# Supplementary material for: Commercial Plant Production and Consumption Still Follow the Latitudinal Gradient in Species Diversity despite Economic Globalization
Source: PLoS One. 2016 Oct 5;11(10):e0163002. doi: 10.1371/journal.pone.0163002 (PMC5051709; doi:10.1371/journal.pone.0163002)
Supplement: S7 File — (XLSX) [file pone.0163002.s010.xlsx]

## Sheet: outputAltFour
FAO Country code	Year	FAO Crop code	Concatenation	Production	Imports	Exports	Consumption
1	1992	15	11992015	141483	367080	0	508563
1	1992	27	11992027	0	48861	0	48861
1	1992	44	11992044	150900	764.682	0	151665
1	1992	56	11992056	4195	204.736	0	4399.74
1	1992	71	11992071	1076	303.063	0	1379.06
1	1992	75	11992075	2295	0	0	2295
1	1992	103	11992103	0	3.14524	0	3.14524
1	1992	116	11992116	322427	38302.4	0	360729
1	1992	156	11992156	0	735532	0	735532
1	1992	157	11992157	800	21135.1	0	21935.1
1	1992	176	11992176	2445	0	0	2445
1	1992	187	11992187	22	0	0	22
1	1992	201	11992201	20	0	0	20
1	1992	211	11992211	0	591.259	0	591.259
1	1992	236	11992236	0	6103.93	0	6103.93
1	1992	267	11992267	0	426.067	0	426.067
1	1992	328	11992328	0	3113.61	0	3113.61
1	1992	333	11992333	60	0	0	60
1	1992	358	11992358	131500	0	0	131500
1	1992	388	11992388	220000	0	0	220000
1	1992	393	11992393	4000	0	0	4000
1	1992	397	11992397	43000	0	0	43000
1	1992	403	11992403	50000	0	0	50000
1	1992	406	11992406	6000	0	0	6000
1	1992	417	11992417	3000	0	0	3000
1	1992	426	11992426	15000	0	0	15000
1	1992	463	11992463	25000	0	0	25000
1	1992	515	11992515	68800	24.0585	0	68824.1
1	1992	521	11992521	17200	0	0	17200
1	1992	526	11992526	16000	0	0	16000
1	1992	534	11992534	12100	0	0	12100
1	1992	536	11992536	8000	0	0	8000
1	1992	541	11992541	7400	0	0	7400
1	1992	558	11992558	300	0	0	300
1	1992	560	11992560	142105	0	0	142105
1	1992	567	11992567	41300	0	0	41300
1	1992	603	11992603	1500	0	0	1500
1	1992	619	11992619	1700	0	11.2	1688.8
1	1992	661	11992661	0	214.427	0	214.427
1	1992	767	11992767	0	2458.74	0	2458.74
1	1992	826	11992826	1484	3190.84	0	4674.84
1	1993	15	11993015	217900	448223	0	666123
1	1993	27	11993027	0	14608.2	0	14608.2
1	1993	44	11993044	83300	765.463	0	84065.5
1	1993	56	11993056	3910	202.299	0	4112.3
1	1993	71	11993071	100	352.654	0	452.654
1	1993	75	11993075	1200	950	0	2150
1	1993	103	11993103	0	3.34181	0	3.34181
1	1993	116	11993116	414000	2306.69	0	416307
1	1993	156	11993156	0	558585	0	558585
1	1993	157	11993157	800	21153.5	0	21953.5
1	1993	176	11993176	3599	0	0	3599
1	1993	187	11993187	27	0	0	27
1	1993	201	11993201	10	0	0	10
1	1993	211	11993211	0	98.8619	0	98.8619
1	1993	236	11993236	0	48.3377	0	48.3377
1	1993	254	11993254	0	257.778	0	257.778
1	1993	256	11993256	0	81.8147	0	81.8147
1	1993	267	11993267	0	548.989	0	548.989
1	1993	270	11993270	0	104.519	0	104.519
1	1993	328	11993328	0	2375.66	0	2375.66
1	1993	358	11993358	103000	0	0	103000
1	1993	388	11993388	199000	0	0	199000
1	1993	393	11993393	3000	0	0	3000
1	1993	397	11993397	36000	0	0	36000
1	1993	403	11993403	37500	0	0	37500
1	1993	406	11993406	7000	0	0	7000
1	1993	417	11993417	2500	0	0	2500
1	1993	426	11993426	12000	0	0	12000
1	1993	463	11993463	17000	0	0	17000
1	1993	515	11993515	25300	150	0	25450
1	1993	521	11993521	6300	0	0	6300
1	1993	526	11993526	5900	0	0	5900
1	1993	534	11993534	4400	0	0	4400
1	1993	536	11993536	3000	0	0	3000
1	1993	541	11993541	2700	0	0	2700
1	1993	558	11993558	100	0	0	100
1	1993	560	11993560	134900	284.363	0	135184
1	1993	567	11993567	32800	0	0	32800
1	1993	603	11993603	600	0	0	600
1	1993	619	11993619	600	0	25.2	574.8
1	1993	661	11993661	0	267.125	0	267.125
1	1993	767	11993767	0	750.75	0	750.75
1	1993	826	11993826	1600	2892.84	0	4492.84
1	1993	999	11993999	0	55	0	55
1	1994	15	11994015	152900	384582	0	537482
1	1994	27	11994027	0	30565.1	0	30565.1
1	1994	44	11994044	69100	1031.2	342.232	69789
1	1994	56	11994056	4900	1006.48	281.606	5624.88
1	1994	71	11994071	120	20440.1	0	20560.1
1	1994	75	11994075	600	0	0	600
1	1994	103	11994103	0	25.555	0	25.555
1	1994	116	11994116	417200	1907.38	897.782	418210
1	1994	156	11994156	0	136042	0	136042
1	1994	157	11994157	800	14714.2	800	14714.2
1	1994	176	11994176	4800	0	0	4800
1	1994	187	11994187	30	0	0	30
1	1994	201	11994201	10	0	0	10
1	1994	211	11994211	0	1067.19	0	1067.19
1	1994	236	11994236	0	14802.8	0	14802.8
1	1994	242	11994242	0	64.2457	0	64.2457
1	1994	254	11994254	0	240.36	0	240.36
1	1994	256	11994256	0	35.702	0	35.702
1	1994	267	11994267	0	5748.2	0	5748.2
1	1994	270	11994270	0	887.501	0	887.501
1	1994	289	11994289	0	55.6303	0	55.6303
1	1994	328	11994328	0	7914.88	0	7914.88
1	1994	358	11994358	105000	0	0	105000
1	1994	388	11994388	195000	753.305	538.3	195215
1	1994	393	11994393	2300	0	0	2300
1	1994	397	11994397	30000	0	0	30000
1	1994	403	11994403	36000	0	0	36000
1	1994	406	11994406	8000	0	0	8000
1	1994	417	11994417	2000	0	0	2000
1	1994	426	11994426	14000	0	0	14000
1	1994	463	11994463	32000	0	0	32000
1	1994	515	11994515	65900	0	0	65900
1	1994	521	11994521	16500	0	0	16500
1	1994	526	11994526	15300	0	0	15300
1	1994	534	11994534	11600	0	0	11600
1	1994	536	11994536	7700	0	0	7700
1	1994	541	11994541	7100	0	70	7030
1	1994	558	11994558	200	0	0	200
1	1994	560	11994560	212400	223.936	0	212624
1	1994	567	11994567	43200	0	0	43200
1	1994	603	11994603	1600	0	0	1600
1	1994	619	11994619	1600	0	11.2	1588.8
1	1994	656	11994656	0	48.7309	0	48.7309
1	1994	661	11994661	0	101.943	0	101.943
1	1994	667	11994667	0	37.4151	0	37.4151
1	1994	767	11994767	0	786.086	0	786.086
1	1994	826	11994826	500	2936.01	0	3436.01
1	1994	999	11994999	0	100	0	100
1	1995	15	11995015	153800	370297	175.253	523922
1	1995	27	11995027	0	7512.03	0	7512.03
1	1995	44	11995044	89300	1345.28	167.607	90477.7
1	1995	56	11995056	4200	12009.4	178.694	16030.7
1	1995	71	11995071	100	11989.9	84.8256	12005
1	1995	75	11995075	800	0	0	800
1	1995	89	11995089	0	62.2142	0	62.2142
1	1995	103	11995103	0	484.111	0	484.111
1	1995	108	11995108	0	0.448824	0	0.448824
1	1995	116	11995116	427700	10829.3	167.134	438362
1	1995	125	11995125	0	1.26172	0	1.26172
1	1995	156	11995156	0	524478	0	524478
1	1995	157	11995157	800	63709.1	800	63709.1
1	1995	176	11995176	3400	0	0	3400
1	1995	187	11995187	30	51.8364	0	81.8364
1	1995	201	11995201	10	0	0	10
1	1995	211	11995211	0	332.873	0	332.873
1	1995	221	11995221	0	3.05059	0	3.05059
1	1995	223	11995223	0	13.4396	0	13.4396
1	1995	236	11995236	0	22712	0	22712
1	1995	242	11995242	0	1542.01	0	1542.01
1	1995	249	11995249	0	57.7251	0	57.7251
1	1995	254	11995254	0	1112.91	0	1112.91
1	1995	256	11995256	0	249.049	0	249.049
1	1995	257	11995257	0	254	0	254
1	1995	260	11995260	0	293.643	0	293.643
1	1995	263	11995263	0	4484.4	0	4484.4
1	1995	267	11995267	0	13423.3	0	13423.3
1	1995	270	11995270	0	474.454	0	474.454
1	1995	289	11995289	0	507.39	0	507.39
1	1995	292	11995292	0	17.7666	0	17.7666
1	1995	328	11995328	0	41862	0	41862
1	1995	333	11995333	0	5055.2	0	5055.2
1	1995	339	11995339	0	31.9865	0	31.9865
1	1995	358	11995358	106000	0	0	106000
1	1995	388	11995388	203000	677.623	147.405	203530
1	1995	393	11995393	3000	0	0	3000
1	1995	397	11995397	35000	20	0	35020
1	1995	403	11995403	45000	378	0	45378
1	1995	406	11995406	11000	0	0	11000
1	1995	414	11995414	0	371.855	0	371.855
1	1995	417	11995417	1500	2001.75	0	3501.75
1	1995	420	11995420	0	402.029	0	402.029
1	1995	426	11995426	17000	0	0	17000
1	1995	446	11995446	0	201.218	0	201.218
1	1995	461	11995461	0	3.66107	0	3.66107
1	1995	463	11995463	28500	2412.33	24	30888.3
1	1995	486	11995486	0	289.651	0	289.651
1	1995	490	11995490	0	2368.42	0	2368.42
1	1995	495	11995495	0	2100	0	2100
1	1995	497	11995497	0	14.4616	0	14.4616
1	1995	507	11995507	0	88	0	88
1	1995	515	11995515	75500	1086.16	666.64	75919.5
1	1995	521	11995521	18900	0	0	18900
1	1995	526	11995526	17600	0	185.216	17414.8
1	1995	534	11995534	13200	0	0	13200
1	1995	536	11995536	8800	0	0	8800
1	1995	541	11995541	8100	0	520	7580
1	1995	558	11995558	300	0	0	300
1	1995	560	11995560	154900	1042.72	48.244	155894
1	1995	567	11995567	54000	242.673	0	54242.7
1	1995	574	11995574	0	2.99585	0	2.99585
1	1995	577	11995577	0	662.114	0	662.114
1	1995	603	11995603	1800	0	0	1800
1	1995	619	11995619	1900	440.743	56.76	2283.98
1	1995	656	11995656	0	1581.98	0	1581.98
1	1995	661	11995661	0	170.437	0	170.437
1	1995	667	11995667	0	84.0649	0	84.0649
1	1995	767	11995767	0	65.8458	0	65.8458
1	1995	826	11995826	200	1249.95	10.85	1439.1
1	1995	999	11995999	0	11412	0	11412
1	1996	15	11996015	201400	293787	93.4276	495093
1	1996	27	11996027	0	85848.7	0	85848.7
1	1996	44	11996044	105200	5465.64	1.50939	110664
1	1996	56	11996056	4381	9234.22	1580.19	12035
1	1996	71	11996071	26	6897.37	1.11171	6922.26
1	1996	75	11996075	1793	2	0	1795
1	1996	89	11996089	0	102.2	0	102.2
1	1996	103	11996103	0	72.0652	0	72.0652
1	1996	108	11996108	0	27.0809	0	27.0809
1	1996	116	11996116	423163	4459.38	2316.7	425306
1	1996	125	11996125	0	0.192621	0	0.192621
1	1996	156	11996156	0	551545	0	551545
1	1996	157	11996157	800	29762.8	800	29762.8
1	1996	176	11996176	5210	502.213	0	5712.21
1	1996	187	11996187	27	48.9536	0	75.9536
1	1996	201	11996201	10	0	0	10
1	1996	211	11996211	0	22.9424	0	22.9424
1	1996	221	11996221	0	33.7749	0	33.7749
1	1996	222	11996222	0	3.45505	0	3.45505
1	1996	223	11996223	0	13.1745	0	13.1745
1	1996	236	11996236	0	15177.3	0	15177.3
1	1996	242	11996242	0	1273.58	0	1273.58
1	1996	249	11996249	0	51.7878	0	51.7878
1	1996	254	11996254	0	737.063	0	737.063
1	1996	256	11996256	0	669.203	0	669.203
1	1996	257	11996257	0	46.5	0	46.5
1	1996	260	11996260	0	26483.9	0	26483.9
1	1996	263	11996263	0	3637.21	0	3637.21
1	1996	267	11996267	0	25869.6	0	25869.6
1	1996	270	11996270	0	124.181	0	124.181
1	1996	289	11996289	0	1379.24	0	1379.24
1	1996	292	11996292	0	2.38871	0	2.38871
1	1996	328	11996328	0	3125.89	0	3125.89
1	1996	339	11996339	0	0.469146	0	0.469146
1	1996	358	11996358	82137	22.2254	0	82159.2
1	1996	388	11996388	180361	8613.17	1379.54	187595
1	1996	393	11996393	3700	0	0	3700
1	1996	397	11996397	48000	1097	0	49097
1	1996	403	11996403	39155	832	0	39987
1	1996	406	11996406	15000	0	0	15000
1	1996	414	11996414	0	104.965	0	104.965
1	1996	417	11996417	1200	371.833	0	1571.83
1	1996	426	11996426	12151	0	0	12151
1	1996	449	11996449	0	69.9509	0	69.9509
1	1996	463	11996463	62800	482.211	0	63282.2
1	1996	486	11996486	0	634.053	0	634.053
1	1996	490	11996490	0	11827.5	0	11827.5
1	1996	495	11996495	0	1676	0	1676
1	1996	497	11996497	0	26.3421	0	26.3421
1	1996	507	11996507	0	637.752	0	637.752
1	1996	515	11996515	80400	3929.22	9444.86	74884.4
1	1996	521	11996521	20100	0	0	20100
1	1996	526	11996526	18700	0.894585	134	18566.9
1	1996	531	11996531	3600	0	0	3600
1	1996	534	11996534	14100	0	0	14100
1	1996	536	11996536	9400	0	0	9400
1	1996	541	11996541	8700	0.194256	194	8506.19
1	1996	558	11996558	300	0	0	300
1	1996	560	11996560	158200	2557.37	155.832	160602
1	1996	567	11996567	60600	1657.01	0	62257
1	1996	574	11996574	0	1374.72	0	1374.72
1	1996	577	11996577	0	1306	0	1306
1	1996	592	11996592	0	578.841	0	578.841
1	1996	603	11996603	1900	178.209	0	2078.21
1	1996	619	11996619	2000	735.921	428.888	2307.03
1	1996	656	11996656	0	2835.91	0	2835.91
1	1996	661	11996661	0	929.984	0	929.984
1	1996	667	11996667	0	31.7203	0	31.7203
1	1996	687	11996687	0	2.04873	0	2.04873
1	1996	702	11996702	0	0.88111	0	0.88111
1	1996	723	11996723	0	0.867225	0	0.867225
1	1996	767	11996767	0	533.916	0	533.916
1	1996	826	11996826	23	1472.52	6	1489.52
1	1996	836	11996836	0	23.2695	0	23.2695
1	1996	999	11996999	0	13310	0	13310
1	1997	15	11997015	183700	373426	42.6218	557084
1	1997	27	11997027	0	20711.1	0	20711.1
1	1997	44	11997044	59327	4418.99	0	63746
1	1997	56	11997056	9565	20010.4	65.1254	29510.3
1	1997	71	11997071	385	568.353	86.3448	867.009
1	1997	75	11997075	1203	0	0	1203
1	1997	89	11997089	0	117.865	0	117.865
1	1997	103	11997103	0	33.8899	0	33.8899
1	1997	108	11997108	0	68.8753	0	68.8753
1	1997	116	11997116	359800	3202.54	100.431	362902
1	1997	156	11997156	0	566440	0	566440
1	1997	157	11997157	800	24627.6	800	24627.6
1	1997	176	11997176	3900	1610	0	5510
1	1997	187	11997187	30	115	0	145
1	1997	201	11997201	8	0	0	8
1	1997	211	11997211	0	81.2729	0	81.2729
1	1997	221	11997221	0	33.0263	0	33.0263
1	1997	223	11997223	0	9.37636	0	9.37636
1	1997	236	11997236	0	15856.5	0	15856.5
1	1997	242	11997242	0	2550.99	0	2550.99
1	1997	249	11997249	0	12.3532	0	12.3532
1	1997	254	11997254	0	13850.8	0	13850.8
1	1997	256	11997256	0	1273.52	0	1273.52
1	1997	257	11997257	0	45.867	0	45.867
1	1997	260	11997260	0	14775.7	0	14775.7
1	1997	263	11997263	0	11100	0	11100
1	1997	267	11997267	0	10898.8	0	10898.8
1	1997	270	11997270	0	446.881	0	446.881
1	1997	289	11997289	0	3240.73	0	3240.73
1	1997	328	11997328	0	8581.07	0	8581.07
1	1997	333	11997333	0	5235.47	0	5235.47
1	1997	358	11997358	88000	27.937	0	88027.9
1	1997	388	11997388	141240	3433.82	1102.2	143572
1	1997	393	11997393	3500	0	0	3500
1	1997	397	11997397	35000	1	0	35001
1	1997	403	11997403	32000	241.082	0	32241.1
1	1997	406	11997406	12000	0	0	12000
1	1997	417	11997417	1000	25.5458	0	1025.55
1	1997	426	11997426	10000	0	0	10000
1	1997	449	11997449	0	4.39239	0	4.39239
1	1997	463	11997463	46500	45.4689	2.22	46543.2
1	1997	486	11997486	0	1119.22	0	1119.22
1	1997	490	11997490	0	8422.8	0	8422.8
1	1997	495	11997495	0	1265	0	1265
1	1997	497	11997497	0	5.9306	0	5.9306
1	1997	507	11997507	0	758.752	0	758.752
1	1997	512	11997512	0	99.9477	0	99.9477
1	1997	515	11997515	49470	3316.25	6314.78	46471.5
1	1997	521	11997521	15100	0	0	15100
1	1997	526	11997526	14100	0	379.546	13720.5
1	1997	531	11997531	2700	0	0	2700
1	1997	534	11997534	10600	0	17	10583
1	1997	536	11997536	7100	0	0	7100
1	1997	541	11997541	6500	0	0	6500
1	1997	558	11997558	300	0	0	300
1	1997	560	11997560	107719	5123.3	747.116	112095
1	1997	567	11997567	62120	1000.76	29	63091.8
1	1997	574	11997574	0	1269.99	0	1269.99
1	1997	577	11997577	0	158.049	0	158.049
1	1997	603	11997603	1400	0	0	1400
1	1997	619	11997619	1500	484.658	1500	484.658
1	1997	656	11997656	0	3786.46	0	3786.46
1	1997	661	11997661	0	136.511	0	136.511
1	1997	667	11997667	0	74.537	0	74.537
1	1997	687	11997687	0	1.78562	0	1.78562
1	1997	723	11997723	0	1.00119	0	1.00119
1	1997	767	11997767	0	86.6147	0	86.6147
1	1997	826	11997826	40	1580.23	40	1580.23
1	1997	836	11997836	0	24.5632	0	24.5632
1	1997	999	11997999	0	748	0	748
1	1998	15	11998015	244300	475170	11.44	719458
1	1998	27	11998027	0	17506.2	0	17506.2
1	1998	44	11998044	71211	4531.92	0	75742.9
1	1998	56	11998056	5738	15296.7	0	21034.7
1	1998	71	11998071	200	149.342	200	149.342
1	1998	75	11998075	1281	39.3015	0	1320.3
1	1998	89	11998089	0	18.269	0	18.269
1	1998	103	11998103	0	8.25624	0	8.25624
1	1998	108	11998108	0	0.203232	0	0.203232
1	1998	116	11998116	440000	741.553	720.049	440022
1	1998	156	11998156	0	586051	0	586051
1	1998	157	11998157	800	18592.6	800	18592.6
1	1998	176	11998176	3195	499.144	0	3694.14
1	1998	187	11998187	25	260	0	285
1	1998	201	11998201	5	0	0	5
1	1998	211	11998211	0	1.59427	0	1.59427
1	1998	221	11998221	0	45.8282	0	45.8282
1	1998	223	11998223	0	8.0504	0	8.0504
1	1998	236	11998236	0	33956.7	0	33956.7
1	1998	242	11998242	0	1316.67	0	1316.67
1	1998	249	11998249	0	11.9216	0	11.9216
1	1998	254	11998254	0	8572.13	0	8572.13
1	1998	256	11998256	0	8.83005	0	8.83005
1	1998	260	11998260	0	20440	0	20440
1	1998	267	11998267	0	4649.85	0	4649.85
1	1998	270	11998270	0	1000.38	0	1000.38
1	1998	289	11998289	0	2491.15	0	2491.15
1	1998	328	11998328	0	4537.89	0	4537.89
1	1998	333	11998333	0	5189.01	0	5189.01
1	1998	358	11998358	90200	18.6484	0	90218.6
1	1998	388	11998388	145000	1877	0	146877
1	1998	393	11998393	3000	0	0	3000
1	1998	397	11998397	40000	0	0	40000
1	1998	403	11998403	36000	95.1588	0	36095.2
1	1998	406	11998406	14000	0	0	14000
1	1998	417	11998417	800	0	0	800
1	1998	426	11998426	12000	0	0	12000
1	1998	463	11998463	54200	13.4053	0	54213.4
1	1998	486	11998486	0	1204.83	0	1204.83
1	1998	490	11998490	0	6170.65	0	6170.65
1	1998	495	11998495	0	2000	0	2000
1	1998	497	11998497	0	22.0362	0	22.0362
1	1998	507	11998507	0	665.984	0	665.984
1	1998	512	11998512	0	92.7276	0	92.7276
1	1998	515	11998515	40700	3843.64	12167.1	32376.6
1	1998	521	11998521	16800	0	0	16800
1	1998	526	11998526	22100	0	472.947	21627.1
1	1998	531	11998531	4300	0	0	4300
1	1998	534	11998534	16600	0	61	16539
1	1998	536	11998536	11100	0	1	11099
1	1998	541	11998541	10200	0	0	10200
1	1998	558	11998558	400	0	0	400
1	1998	560	11998560	105900	5261.53	675.11	110486
1	1998	567	11998567	60600	602.141	25	61177.1
1	1998	574	11998574	0	1793.75	0	1793.75
1	1998	577	11998577	0	460	0	460
1	1998	603	11998603	2200	0	0	2200
1	1998	619	11998619	2300	632.237	1396.72	1535.52
1	1998	656	11998656	0	3562.28	0	3562.28
1	1998	661	11998661	0	322.175	0	322.175
1	1998	667	11998667	0	82.0475	0	82.0475
1	1998	767	11998767	0	80.6915	0	80.6915
1	1998	826	11998826	200	1232.55	169.25	1263.3
1	1998	836	11998836	0	22.1333	0	22.1333
1	1998	999	11998999	0	750	0	750
1	1999	15	11999015	219200	282027	78.0829	501149
1	1999	27	11999027	0	22432	0	22432
1	1999	44	11999044	65200	5342.23	137.524	70404.7
1	1999	56	11999056	11450	27408.6	112.849	38745.8
1	1999	71	11999071	130	11905.3	130	11905.3
1	1999	75	11999075	1124	6.2055	0	1130.21
1	1999	79	11999079	0	85.4427	0	85.4427
1	1999	103	11999103	0	7.3913	0	7.3913
1	1999	108	11999108	0	0.250771	0	0.250771
1	1999	116	11999116	414123	663.067	730.46	414056
1	1999	125	11999125	0	1.16094	0	1.16094
1	1999	156	11999156	0	589714	0	589714
1	1999	157	11999157	800	15481.6	800	15481.6
1	1999	176	11999176	3550	10.245	0	3560.24
1	1999	187	11999187	89	845	0	934
1	1999	191	11999191	0	154	0	154
1	1999	201	11999201	5	199.889	0	204.889
1	1999	221	11999221	0	67.8559	0	67.8559
1	1999	222	11999222	0	1.71336	0	1.71336
1	1999	223	11999223	0	2.99988	0	2.99988
1	1999	234	11999234	0	142.193	0	142.193
1	1999	236	11999236	0	27012.7	0	27012.7
1	1999	242	11999242	0	1261.44	0	1261.44
1	1999	249	11999249	0	15.0915	0	15.0915
1	1999	254	11999254	0	6019.77	0	6019.77
1	1999	256	11999256	0	670.631	0	670.631
1	1999	260	11999260	0	726.208	0	726.208
1	1999	265	11999265	0	2.5	0	2.5
1	1999	267	11999267	0	16622.7	0	16622.7
1	1999	270	11999270	0	429.158	0	429.158
1	1999	280	11999280	0	27.9293	0	27.9293
1	1999	289	11999289	0	1042.31	0	1042.31
1	1999	328	11999328	0	6395.48	0	6395.48
1	1999	333	11999333	0	141.182	0	141.182
1	1999	358	11999358	94019	0	149	93870
1	1999	388	11999388	151400	5398.81	371.34	156427
1	1999	393	11999393	2396	0	0	2396
1	1999	397	11999397	55300	67	0	55367
1	1999	403	11999403	40485	79.7224	5	40559.7
1	1999	406	11999406	6970	0	0	6970
1	1999	417	11999417	150	45.6651	1	194.665
1	1999	420	11999420	0	0.569169	0	0.569169
1	1999	426	11999426	18314	0	0	18314
1	1999	446	11999446	0	20.3677	0	20.3677
1	1999	449	11999449	0	45.8794	0	45.8794
1	1999	463	11999463	80000	254.248	18.528	80235.7
1	1999	486	11999486	0	1394.87	0	1394.87
1	1999	490	11999490	0	10194.7	0	10194.7
1	1999	495	11999495	0	231	0	231
1	1999	497	11999497	0	3.46189	0	3.46189
1	1999	507	11999507	0	32.64	0	32.64
1	1999	512	11999512	0	495.481	0	495.481
1	1999	515	11999515	23522	620.69	10595.5	13547.2
1	1999	521	11999521	16465	0	0	16465
1	1999	526	11999526	15382	241.19	1812.45	13810.7
1	1999	531	11999531	3500	0	0	3500
1	1999	534	11999534	11536	0	0	11536
1	1999	536	11999536	7691	23.0028	0	7714
1	1999	541	11999541	7100	0	0	7100
1	1999	558	11999558	300	0	0	300
1	1999	560	11999560	114754	3182.63	667.059	117270
1	1999	567	11999567	88500	561.113	0	89061.1
1	1999	574	11999574	0	57.0263	0	57.0263
1	1999	577	11999577	0	357.81	0	357.81
1	1999	592	11999592	0	865.593	0	865.593
1	1999	603	11999603	1500	2.34585	0	1502.35
1	1999	619	11999619	1600	657.305	228.088	2029.22
1	1999	656	11999656	0	5979.89	0	5979.89
1	1999	661	11999661	0	588.823	0	588.823
1	1999	667	11999667	0	147.151	0	147.151
1	1999	677	11999677	0	20.6842	0	20.6842
1	1999	687	11999687	0	6.14598	0	6.14598
1	1999	692	11999692	0	1.68255	0	1.68255
1	1999	711	11999711	0	5.69237	0	5.69237
1	1999	720	11999720	0	3.53803	0	3.53803
1	1999	767	11999767	0	390.153	0	390.153
1	1999	780	11999780	0	5	0	5
1	1999	826	11999826	1855	4471.29	1565.22	4761.07
1	1999	836	11999836	0	0.36341	0	0.36341
1	1999	999	11999999	0	1515	0	1515
1	2000	15	12000015	181561	434697	1431.18	614827
1	2000	27	12000027	0	16561.3	0	16561.3
1	2000	44	12000044	32944	3682.71	1762.02	34864.7
1	2000	56	12000056	5915	37710.1	0	43625.1
1	2000	71	12000071	101	16155.9	90.5323	16166.4
1	2000	75	12000075	298	43.4385	0	341.438
1	2000	103	12000103	0	10.2249	0	10.2249
1	2000	108	12000108	0	0.491933	0	0.491933
1	2000	116	12000116	290260	522.986	620.549	290162
1	2000	125	12000125	0	0.667727	0	0.667727
1	2000	156	12000156	0	601690	0	601690
1	2000	157	12000157	800	13223.8	800	13223.8
1	2000	176	12000176	3838	253	0	4091
1	2000	187	12000187	22	1059	0	1081
1	2000	191	12000191	0	57.7062	0	57.7062
1	2000	201	12000201	3	805.945	0	808.945
1	2000	221	12000221	0	62.3912	0	62.3912
1	2000	223	12000223	0	109.132	0	109.132
1	2000	225	12000225	0	46.771	0	46.771
1	2000	234	12000234	0	95.6651	0	95.6651
1	2000	236	12000236	0	17946.2	0	17946.2
1	2000	242	12000242	0	1432.86	0	1432.86
1	2000	249	12000249	0	1114.89	0	1114.89
1	2000	254	12000254	0	1899.01	0	1899.01
1	2000	256	12000256	0	412.195	0	412.195
1	2000	257	12000257	0	16	0	16
1	2000	260	12000260	0	831.675	0	831.675
1	2000	265	12000265	0	2.24991	0	2.24991
1	2000	267	12000267	0	27832.4	0	27832.4
1	2000	270	12000270	0	263.614	0	263.614
1	2000	280	12000280	0	25.2698	0	25.2698
1	2000	289	12000289	0	1492.09	0	1492.09
1	2000	292	12000292	0	0.630177	0	0.630177
1	2000	328	12000328	0	7739.91	0	7739.91
1	2000	333	12000333	0	77.3768	0	77.3768
1	2000	358	12000358	51540	0	0	51540
1	2000	388	12000388	143667	1142.62	5342.8	139467
1	2000	393	12000393	2240	0	0	2240
1	2000	397	12000397	30000	4	0	30004
1	2000	403	12000403	31328	15.4482	0	31343.4
1	2000	406	12000406	6081	0	0	6081
1	2000	417	12000417	1228	0	0	1228
1	2000	420	12000420	0	13.682	0	13.682
1	2000	426	12000426	6631	0	0	6631
1	2000	446	12000446	0	114.361	0	114.361
1	2000	449	12000449	0	6.513	0	6.513
1	2000	463	12000463	103000	94.0559	53.22	103041
1	2000	486	12000486	0	726.272	0	726.272
1	2000	490	12000490	0	937.539	0	937.539
1	2000	495	12000495	0	360	0	360
1	2000	497	12000497	0	6.98193	0	6.98193
1	2000	507	12000507	0	38.92	0	38.92
1	2000	512	12000512	0	61.0511	0	61.0511
1	2000	515	12000515	23230	55.5982	5985.38	17300.2
1	2000	521	12000521	16261	0	0	16261
1	2000	526	12000526	36720	27.8297	119.405	36628.4
1	2000	531	12000531	3000	0	0	3000
1	2000	534	12000534	26800	0	139.503	26660.5
1	2000	536	12000536	11800	51.9709	3	11849
1	2000	541	12000541	7000	0	0	7000
1	2000	558	12000558	400	0	0	400
1	2000	560	12000560	115841	2999.54	449.784	118391
1	2000	567	12000567	52844	202.922	0	53046.9
1	2000	569	12000569	0	11.7375	0	11.7375
1	2000	574	12000574	0	110.915	0	110.915
1	2000	577	12000577	0	251	0	251
1	2000	592	12000592	0	46.487	0	46.487
1	2000	603	12000603	1600	0	0	1600
1	2000	619	12000619	1700	302.794	1416.34	586.454
1	2000	656	12000656	0	6929.87	0	6929.87
1	2000	661	12000661	0	738.592	0	738.592
1	2000	667	12000667	0	115.411	0	115.411
1	2000	677	12000677	0	8.89883	0	8.89883
1	2000	687	12000687	0	17.074	0	17.074
1	2000	689	12000689	0	4.6298	0	4.6298
1	2000	692	12000692	0	1.86384	0	1.86384
1	2000	702	12000702	0	0.802476	0	0.802476
1	2000	723	12000723	0	0.654333	0	0.654333
1	2000	767	12000767	0	181.306	0	181.306
1	2000	780	12000780	0	12	0	12
1	2000	826	12000826	4577	1658.85	107.412	6128.44
1	2000	999	12000999	0	1766	0	1766
1	2001	15	12001015	245579	327042	1293.72	571327
1	2001	27	12001027	0	19957.6	0	19957.6
1	2001	44	12001044	107451	3492.01	1143.03	109800
1	2001	56	12001056	9865	48583.4	2069.72	56378.7
1	2001	71	12001071	182	102.581	182	102.581
1	2001	75	12001075	967	89.877	0	1056.88
1	2001	103	12001103	0	4.39119	0	4.39119
1	2001	108	12001108	0	1.63261	0	1.63261
1	2001	116	12001116	363834	2556.51	10797.9	355593
1	2001	125	12001125	0	0.177688	0	0.177688
1	2001	156	12001156	0	637790	0	637790
1	2001	157	12001157	800	16599.6	800	16599.6
1	2001	176	12001176	3067	14	0	3081
1	2001	187	12001187	27	2727.86	0	2754.86
1	2001	191	12001191	0	1.80119	0	1.80119
1	2001	201	12001201	14	862.413	0	876.413
1	2001	211	12001211	0	2.34326	0	2.34326
1	2001	221	12001221	0	106.728	0	106.728
1	2001	223	12001223	0	315.407	0	315.407
1	2001	225	12001225	0	9.43825	0	9.43825
1	2001	234	12001234	0	71	0	71
1	2001	236	12001236	0	24132.5	0	24132.5
1	2001	242	12001242	0	1752.61	0	1752.61
1	2001	249	12001249	0	528.186	0	528.186
1	2001	254	12001254	0	5080.41	0	5080.41
1	2001	256	12001256	0	473.966	0	473.966
1	2001	257	12001257	0	89.9483	0	89.9483
1	2001	260	12001260	0	1153.72	0	1153.72
1	2001	265	12001265	0	50.6011	0	50.6011
1	2001	267	12001267	0	27483.9	0	27483.9
1	2001	270	12001270	0	254.387	0	254.387
1	2001	289	12001289	0	2028.51	0	2028.51
1	2001	292	12001292	0	1.38108	0	1.38108
1	2001	328	12001328	0	10733.4	0	10733.4
1	2001	333	12001333	0	57.0319	0	57.0319
1	2001	358	12001358	80356	0	0	80356
1	2001	388	12001388	158277	1450.47	26013.2	133714
1	2001	393	12001393	3795	0	0	3795
1	2001	397	12001397	39100	4	0	39104
1	2001	403	12001403	32979	3.48943	0	32982.5
1	2001	406	12001406	6686	5.56715	0	6691.57
1	2001	417	12001417	730	7.18202	0	737.182
1	2001	426	12001426	14114	0	0	14114
1	2001	446	12001446	0	77.5098	0	77.5098
1	2001	449	12001449	0	10.0156	0	10.0156
1	2001	463	12001463	120000	4512.39	114.454	124398
1	2001	486	12001486	0	930.134	0	930.134
1	2001	490	12001490	0	2152.21	0	2152.21
1	2001	495	12001495	0	270	0	270
1	2001	497	12001497	0	32.5926	0	32.5926
1	2001	507	12001507	0	266.465	0	266.465
1	2001	512	12001512	0	164.045	0	164.045
1	2001	515	12001515	35380	223.106	1497.91	34105.2
1	2001	521	12001521	9780	0	0	9780
1	2001	526	12001526	10800	21.0007	51.38	10769.6
1	2001	531	12001531	2000	0	2	1998
1	2001	534	12001534	16000	0	0	16000
1	2001	536	12001536	10500	57.3626	0	10557.4
1	2001	541	12001541	14700	0	0	14700
1	2001	558	12001558	400	0	0	400
1	2001	560	12001560	116500	3786.66	1853.46	118433
1	2001	567	12001567	54797	17.5952	0	54814.6
1	2001	574	12001574	0	1247.27	0	1247.27
1	2001	577	12001577	0	296.36	0	296.36
1	2001	592	12001592	0	25.8411	0	25.8411
1	2001	603	12001603	1400	0	0	1400
1	2001	619	12001619	1500	227.753	1385.46	342.293
1	2001	656	12001656	0	8979.98	0	8979.98
1	2001	661	12001661	0	931.579	0	931.579
1	2001	667	12001667	0	124.477	0	124.477
1	2001	677	12001677	0	13.8797	0	13.8797
1	2001	687	12001687	0	35.9535	0	35.9535
1	2001	689	12001689	0	7.44207	0	7.44207
1	2001	692	12001692	0	3.7518	0	3.7518
1	2001	693	12001693	0	1.60255	0	1.60255
1	2001	702	12001702	0	2.55026	0	2.55026
1	2001	723	12001723	0	2.84123	0	2.84123
1	2001	754	12001754	0	0.791106	0	0.791106
1	2001	767	12001767	0	496.335	0	496.335
1	2001	826	12001826	2541	2642.83	696.993	4486.84
1	2001	999	12001999	0	1442	0	1442
1	2002	15	12002015	289170	365488	3768.64	650889
1	2002	27	12002027	0	22369.2	0	22369.2
1	2002	44	12002044	109495	3644.65	2984.17	110155
1	2002	56	12002056	12156	55975.4	0	68131.4
1	2002	71	12002071	298	206.465	172.94	331.525
1	2002	75	12002075	964	185.963	0	1149.96
1	2002	103	12002103	0	12.8365	0	12.8365
1	2002	108	12002108	0	2.23815	0	2.23815
1	2002	116	12002116	374263	2536.62	5816.09	370984
1	2002	125	12002125	0	1.42876	0	1.42876
1	2002	156	12002156	0	599005	0	599005
1	2002	157	12002157	811	20242.4	811	20242.4
1	2002	176	12002176	3309	3	0	3312
1	2002	187	12002187	48	1388.43	0	1436.43
1	2002	201	12002201	11	2274.92	0	2285.92
1	2002	211	12002211	0	16.2167	0	16.2167
1	2002	221	12002221	0	71.7749	0	71.7749
1	2002	222	12002222	0	12.9817	0	12.9817
1	2002	223	12002223	0	246.434	0	246.434
1	2002	234	12002234	0	52.5093	0	52.5093
1	2002	236	12002236	0	16888.5	0	16888.5
1	2002	242	12002242	0	1446.91	0	1446.91
1	2002	249	12002249	0	1289.84	0	1289.84
1	2002	254	12002254	0	4993.19	0	4993.19
1	2002	256	12002256	0	1050.38	0	1050.38
1	2002	257	12002257	0	33.8956	0	33.8956
1	2002	260	12002260	0	1604.4	0	1604.4
1	2002	265	12002265	0	9.38863	0	9.38863
1	2002	267	12002267	0	42712.1	0	42712.1
1	2002	289	12002289	0	1635.65	0	1635.65
1	2002	292	12002292	0	2.56897	0	2.56897
1	2002	296	12002296	0	1.25175	0	1.25175
1	2002	328	12002328	0	9958.37	0	9958.37
1	2002	333	12002333	0	93.1893	0	93.1893
1	2002	358	12002358	82688	0	0	82688
1	2002	388	12002388	170008	2322.24	16254.8	156075
1	2002	393	12002393	3605	0	0	3605
1	2002	397	12002397	36580	8	0	36588
1	2002	403	12002403	37319	93.5401	0	37412.5
1	2002	406	12002406	5119	1.65058	0	5120.65
1	2002	417	12002417	622	0	0	622
1	2002	426	12002426	12420	0	0	12420
1	2002	446	12002446	0	231.817	0	231.817
1	2002	449	12002449	0	34.2931	0	34.2931
1	2002	463	12002463	118300	54.7048	191.184	118164
1	2002	486	12002486	0	1648.73	0	1648.73
1	2002	490	12002490	0	1638.54	0	1638.54
1	2002	495	12002495	0	66	0	66
1	2002	497	12002497	0	13.8725	0	13.8725
1	2002	507	12002507	0	349.861	0	349.861
1	2002	512	12002512	0	52.7406	0	52.7406
1	2002	515	12002515	35200	288.784	1038.54	34450.2
1	2002	521	12002521	8960	4.34588	0	8964.35
1	2002	526	12002526	5000	18.8596	42.0429	4976.82
1	2002	531	12002531	2800	0	110.547	2689.45
1	2002	534	12002534	10500	1.92558	2	10499.9
1	2002	536	12002536	10000	34.8693	0	10034.9
1	2002	541	12002541	7200	0	0	7200
1	2002	558	12002558	378	0	0	378
1	2002	560	12002560	103962	2939.5	1134.67	105767
1	2002	567	12002567	89742	225.646	0	89967.6
1	2002	569	12002569	0	6.98395	0	6.98395
1	2002	574	12002574	0	1138.81	0	1138.81
1	2002	577	12002577	0	279	0	279
1	2002	592	12002592	0	37.3839	0	37.3839
1	2002	603	12002603	1026	0	0	1026
1	2002	619	12002619	1153	438.888	947.58	644.308
1	2002	656	12002656	0	9029.58	0	9029.58
1	2002	661	12002661	0	1079.94	0	1079.94
1	2002	667	12002667	0	149.452	0	149.452
1	2002	677	12002677	0	8.678	0	8.678
1	2002	687	12002687	0	24.5979	0	24.5979
1	2002	689	12002689	0	14.8979	0	14.8979
1	2002	692	12002692	0	15.2708	0	15.2708
1	2002	693	12002693	0	1.44585	0	1.44585
1	2002	698	12002698	0	0.713409	0	0.713409
1	2002	702	12002702	0	0.839352	0	0.839352
1	2002	720	12002720	0	0.26353	0	0.26353
1	2002	723	12002723	0	5.87468	0	5.87468
1	2002	767	12002767	0	144.828	0	144.828
1	2002	777	12002777	0	0.390206	0	0.390206
1	2002	826	12002826	2714	2272.14	533.5	4452.64
1	2002	999	12002999	0	2405	0	2405
1	2003	15	12003015	220977	303098	6240.82	517835
1	2003	27	12003027	0	25514.6	0	25514.6
1	2003	44	12003044	68273	4766.34	4682.99	68356.3
1	2003	56	12003056	15241	46585.8	313.57	61513.3
1	2003	71	12003071	158	758.38	147.457	768.923
1	2003	75	12003075	594	150.67	0	744.67
1	2003	79	12003079	0	21.9834	0	21.9834
1	2003	103	12003103	0	21.7808	0	21.7808
1	2003	108	12003108	4339	2.43037	0	4341.43
1	2003	116	12003116	507518	3966.09	15142.4	496342
1	2003	125	12003125	0	0.353176	0	0.353176
1	2003	156	12003156	0	764518	0	764518
1	2003	157	12003157	1500	30714.9	1500	30714.9
1	2003	176	12003176	4470	27.5994	0	4497.6
1	2003	187	12003187	81	1024.9	0	1105.9
1	2003	191	12003191	0	17.6388	0	17.6388
1	2003	201	12003201	78	839.355	0	917.355
1	2003	211	12003211	81	0	0	81
1	2003	221	12003221	0	204.949	0	204.949
1	2003	223	12003223	0	325.656	0	325.656
1	2003	225	12003225	0	6	0	6
1	2003	234	12003234	0	74.4805	0	74.4805
1	2003	236	12003236	0	37153.7	0	37153.7
1	2003	242	12003242	0	1625.05	0	1625.05
1	2003	249	12003249	0	2381.36	0	2381.36
1	2003	254	12003254	0	411.355	0	411.355
1	2003	256	12003256	0	1702.11	0	1702.11
1	2003	257	12003257	0	148	0	148
1	2003	260	12003260	0	2582	0	2582
1	2003	265	12003265	0	7.60322	0	7.60322
1	2003	267	12003267	0	31194.1	0	31194.1
1	2003	270	12003270	0	5.96462	0	5.96462
1	2003	289	12003289	0	1527.59	0	1527.59
1	2003	292	12003292	0	3.42137	0	3.42137
1	2003	296	12003296	0	1.45268	0	1.45268
1	2003	328	12003328	0	8518.5	0	8518.5
1	2003	333	12003333	0	42.3831	0	42.3831
1	2003	358	12003358	92585	0.734097	20	92565.7
1	2003	388	12003388	225573	1759.87	28261.4	199072
1	2003	393	12003393	4943	0	0	4943
1	2003	397	12003397	36582	6	0	36588
1	2003	403	12003403	33521	93.9764	0	33615
1	2003	406	12003406	6504	0.361551	0	6504.36
1	2003	417	12003417	274	0	0	274
1	2003	426	12003426	11811	0	0	11811
1	2003	446	12003446	0	322.672	0	322.672
1	2003	449	12003449	0	60.5287	0	60.5287
1	2003	463	12003463	157534	510.664	153.544	157891
1	2003	486	12003486	0	2491.33	0	2491.33
1	2003	490	12003490	0	2764.94	0	2764.94
1	2003	495	12003495	0	82.8316	0	82.8316
1	2003	497	12003497	0	54.6801	0	54.6801
1	2003	507	12003507	0	409.951	0	409.951
1	2003	512	12003512	0	22.442	0	22.442
1	2003	515	12003515	52800	389.777	340.678	52849.1
1	2003	521	12003521	19900	4.13908	0	19904.1
1	2003	526	12003526	4500	37.1842	237.448	4299.74
1	2003	531	12003531	2300	0	210	2090
1	2003	534	12003534	9500	1.94805	23	9478.95
1	2003	536	12003536	9100	173.58	0	9273.58
1	2003	541	12003541	2300	0	0	2300
1	2003	558	12003558	428	0	0	428
1	2003	560	12003560	81600	3545.52	1093.47	84052.1
1	2003	567	12003567	115417	36.1335	0	115453
1	2003	568	12003568	0	2.94649	0	2.94649
1	2003	569	12003569	0	16.5448	0	16.5448
1	2003	574	12003574	0	750.029	0	750.029
1	2003	577	12003577	0	335	0	335
1	2003	592	12003592	0	16.2233	0	16.2233
1	2003	603	12003603	569	0	0	569
1	2003	619	12003619	1730	804.595	1433.4	1101.19
1	2003	656	12003656	0	8159.07	0	8159.07
1	2003	661	12003661	0	1387.87	0	1387.87
1	2003	667	12003667	0	158.037	0	158.037
1	2003	677	12003677	0	14.0545	0	14.0545
1	2003	687	12003687	0	40.9192	0	40.9192
1	2003	689	12003689	0	36.5767	0	36.5767
1	2003	692	12003692	0	6.06829	0	6.06829
1	2003	693	12003693	0	1.4256	0	1.4256
1	2003	698	12003698	0	1.46184	0	1.46184
1	2003	702	12003702	0	1.85922	0	1.85922
1	2003	711	12003711	0	15.4788	0	15.4788
1	2003	723	12003723	0	4.41763	0	4.41763
1	2003	767	12003767	0	258.882	0	258.882
1	2003	777	12003777	0	0.314978	0	0.314978
1	2003	826	12003826	1204	2955.81	464.093	3695.72
1	2003	836	12003836	0	24.6902	0	24.6902
1	2003	999	12003999	0	4453	0	4453
1	2004	15	12004015	299900	392066	5135.09	686831
1	2004	27	12004027	0	25920.8	0	25920.8
1	2004	44	12004044	131138	10122.9	418.707	140842
1	2004	56	12004056	19322	73508.9	1474.22	91356.7
1	2004	71	12004071	404	993.417	404	993.417
1	2004	75	12004075	884	91.014	0	975.014
1	2004	79	12004079	0	18.1612	0	18.1612
1	2004	97	12004097	0	16.2525	0	16.2525
1	2004	103	12004103	0	45.2521	0	45.2521
1	2004	108	12004108	8337	6.41992	0	8343.42
1	2004	116	12004116	576427	3625.76	146.353	579906
1	2004	125	12004125	0	2.26349	0	2.26349
1	2004	156	12004156	0	667403	0	667403
1	2004	157	12004157	6000	37424.4	6000	37424.4
1	2004	176	12004176	4959	79.6264	0	5038.63
1	2004	187	12004187	149	1235.23	0	1384.23
1	2004	191	12004191	0	38.1469	0	38.1469
1	2004	201	12004201	18	1144.12	0	1162.12
1	2004	211	12004211	108	23.6577	0	131.658
1	2004	221	12004221	0	138.917	0	138.917
1	2004	222	12004222	0	475.218	0	475.218
1	2004	223	12004223	0	295.054	0	295.054
1	2004	225	12004225	0	24	0	24
1	2004	234	12004234	0	16.4768	0	16.4768
1	2004	236	12004236	0	10629.4	0	10629.4
1	2004	242	12004242	0	1399.15	0	1399.15
1	2004	249	12004249	0	2070.99	0	2070.99
1	2004	254	12004254	0	7442.48	0	7442.48
1	2004	256	12004256	0	1952.07	0	1952.07
1	2004	257	12004257	0	162.645	0	162.645
1	2004	260	12004260	0	1960.89	0	1960.89
1	2004	267	12004267	0	31909.3	0	31909.3
1	2004	270	12004270	0	4.73964	0	4.73964
1	2004	289	12004289	0	1523.46	0	1523.46
1	2004	292	12004292	0	7.20592	0	7.20592
1	2004	328	12004328	0	8621.71	0	8621.71
1	2004	333	12004333	0	5.60652	0	5.60652
1	2004	358	12004358	93789	0	0	93789
1	2004	388	12004388	229478	2128.96	26921.4	204686
1	2004	393	12004393	6219	0	0	6219
1	2004	397	12004397	60250	67	0	60317
1	2004	401	12004401	0	0.980699	0	0.980699
1	2004	403	12004403	42789	1117.79	0	43906.8
1	2004	406	12004406	7288	0.553441	0	7288.55
1	2004	417	12004417	296	0	0	296
1	2004	426	12004426	14382	0	0	14382
1	2004	446	12004446	0	478.637	0	478.637
1	2004	449	12004449	0	68.0402	0	68.0402
1	2004	463	12004463	146199	180.031	124.323	146255
1	2004	486	12004486	0	3457.9	0	3457.9
1	2004	490	12004490	0	6753.44	0	6753.44
1	2004	495	12004495	0	149.756	0	149.756
1	2004	497	12004497	0	278.38	0	278.38
1	2004	507	12004507	0	783.237	0	783.237
1	2004	512	12004512	0	60.9515	0	60.9515
1	2004	515	12004515	56000	841.758	562.268	56279.5
1	2004	521	12004521	21270	0	0	21270
1	2004	526	12004526	5400	63.8863	68.4483	5395.44
1	2004	531	12004531	2700	0	17	2683
1	2004	534	12004534	11400	0	0	11400
1	2004	536	12004536	11000	118.922	0	11118.9
1	2004	541	12004541	2600	0	0	2600
1	2004	558	12004558	2381	0	0	2381
1	2004	560	12004560	148892	2964.94	122.371	151735
1	2004	567	12004567	112900	26	0	112926
1	2004	569	12004569	0	117.375	0	117.375
1	2004	574	12004574	0	771.693	0	771.693
1	2004	577	12004577	0	175.67	0	175.67
1	2004	592	12004592	0	97.939	0	97.939
1	2004	603	12004603	2250	0	0	2250
1	2004	619	12004619	3500	1261.86	901.66	3860.2
1	2004	656	12004656	0	9613.51	0	9613.51
1	2004	661	12004661	0	1578.73	0	1578.73
1	2004	667	12004667	0	149.149	0	149.149
1	2004	677	12004677	0	17	0	17
1	2004	687	12004687	0	31.1946	0	31.1946
1	2004	689	12004689	0	20.5378	0	20.5378
1	2004	692	12004692	0	10.0148	0	10.0148
1	2004	693	12004693	0	4.08667	0	4.08667
1	2004	698	12004698	0	0.688889	0	0.688889
1	2004	702	12004702	0	0.681554	0	0.681554
1	2004	711	12004711	0	39.1709	0	39.1709
1	2004	723	12004723	0	15.1495	0	15.1495
1	2004	767	12004767	0	256.767	0	256.767
1	2004	780	12004780	0	2.67917	0	2.67917
1	2004	826	12004826	1100	2931.34	556.329	3475.01
1	2004	836	12004836	0	73.8142	0	73.8142
1	2004	999	12004999	0	8110	0	8110
1	2005	15	12005015	265700	321528	1294.62	585933
1	2005	27	12005027	0	78571.4	0	78571.4
1	2005	44	12005044	110771	7095.26	3003.12	114863
1	2005	56	12005056	14127	38863.5	14127	38863.5
1	2005	71	12005071	587	1353.66	587	1353.66
1	2005	75	12005075	650	53.1389	0	703.139
1	2005	79	12005079	0	19	0	19
1	2005	89	12005089	0	1.03707	0	1.03707
1	2005	103	12005103	0	138.677	0	138.677
1	2005	108	12005108	7333	6.947	0	7339.95
1	2005	116	12005116	564211	5422.72	12851.2	556783
1	2005	125	12005125	0	2.14887	0	2.14887
1	2005	156	12005156	0	917868	0	917868
1	2005	157	12005157	16000	51956.3	16000	51956.3
1	2005	176	12005176	4085	0	0	4085
1	2005	187	12005187	166	1589.77	0	1755.77
1	2005	191	12005191	0	89.0712	0	89.0712
1	2005	201	12005201	24	1345	0	1369
1	2005	211	12005211	74	9.30423	0	83.3042
1	2005	220	12005220	0	0.494116	0	0.494116
1	2005	221	12005221	0	121.38	0	121.38
1	2005	222	12005222	0	18	0	18
1	2005	223	12005223	0	332.476	0	332.476
1	2005	225	12005225	0	46	0	46
1	2005	234	12005234	0	19.3398	0	19.3398
1	2005	236	12005236	0	16464.8	0	16464.8
1	2005	242	12005242	0	2195.33	0	2195.33
1	2005	249	12005249	0	4096.44	0	4096.44
1	2005	254	12005254	0	2814.48	0	2814.48
1	2005	256	12005256	0	1805.19	0	1805.19
1	2005	257	12005257	0	104	0	104
1	2005	260	12005260	0	5523.99	0	5523.99
1	2005	265	12005265	0	10.3756	0	10.3756
1	2005	267	12005267	0	42978.2	0	42978.2
1	2005	270	12005270	0	28.7286	0	28.7286
1	2005	289	12005289	0	1745.14	0	1745.14
1	2005	292	12005292	0	3.39794	0	3.39794
1	2005	296	12005296	0	3.10236	0	3.10236
1	2005	328	12005328	0	8946.84	0	8946.84
1	2005	333	12005333	0	117.469	0	117.469
1	2005	339	12005339	0	0.831331	0	0.831331
1	2005	358	12005358	107172	0	0	107172
1	2005	388	12005388	234948	2373.33	28843	208478
1	2005	393	12005393	5621	0	0	5621
1	2005	397	12005397	64407	311	0	64718
1	2005	399	12005399	0	13.4388	0	13.4388
1	2005	401	12005401	0	7.92279	0	7.92279
1	2005	402	12005402	0	0.507474	0	0.507474
1	2005	403	12005403	48787	1175.57	0	49962.6
1	2005	406	12005406	8681	6.70335	0	8687.7
1	2005	414	12005414	0	0.649159	0	0.649159
1	2005	417	12005417	619	1.33396	0	620.334
1	2005	426	12005426	17075	0	0	17075
1	2005	446	12005446	0	701.342	0	701.342
1	2005	449	12005449	0	90.3611	0	90.3611
1	2005	463	12005463	176377	633.123	66.967	176943
1	2005	486	12005486	0	7436.31	0	7436.31
1	2005	490	12005490	0	7881.82	0	7881.82
1	2005	495	12005495	0	1651	0	1651
1	2005	497	12005497	0	307.217	0	307.217
1	2005	507	12005507	0	645.15	0	645.15
1	2005	512	12005512	0	70.5578	0	70.5578
1	2005	515	12005515	210000	1195.93	613.933	210582
1	2005	521	12005521	30000	1.64707	0	30001.6
1	2005	523	12005523	0	8	0	8
1	2005	526	12005526	10000	63.3073	707.241	9356.07
1	2005	531	12005531	7500	0	144	7356
1	2005	534	12005534	25600	0	57	25543
1	2005	536	12005536	15400	88.5334	13.0378	15475.5
1	2005	541	12005541	7200	0	0	7200
1	2005	558	12005558	2700	0	0	2700
1	2005	560	12005560	164353	4035.16	239.726	168148
1	2005	567	12005567	117798	8	0	117806
1	2005	569	12005569	0	99.8125	0	99.8125
1	2005	574	12005574	0	1823.34	0	1823.34
1	2005	577	12005577	0	546.063	0	546.063
1	2005	592	12005592	0	397.503	0	397.503
1	2005	603	12005603	1800	4.86843	0	1804.87
1	2005	619	12005619	5400	1133.26	1854.46	4678.8
1	2005	656	12005656	0	9096.21	0	9096.21
1	2005	661	12005661	0	1727.79	0	1727.79
1	2005	667	12005667	0	242.29	0	242.29
1	2005	677	12005677	0	21.3314	0	21.3314
1	2005	687	12005687	0	42.1266	0	42.1266
1	2005	689	12005689	0	18.0664	0	18.0664
1	2005	692	12005692	0	8.5626	0	8.5626
1	2005	693	12005693	0	4.86499	0	4.86499
1	2005	698	12005698	0	1.05739	0	1.05739
1	2005	702	12005702	0	0.768817	0	0.768817
1	2005	711	12005711	0	4.2014	0	4.2014
1	2005	723	12005723	0	39.6359	0	39.6359
1	2005	767	12005767	0	187.238	0	187.238
1	2005	780	12005780	0	0.906686	0	0.906686
1	2005	826	12005826	500	2851.17	286.713	3064.46
1	2005	836	12005836	0	118.626	0	118.626
1	2005	999	12005999	0	4833	0	4833
1	2006	15	12006015	152900	311267	4667.02	459500
1	2006	27	12006027	0	73285.2	0	73285.2
1	2006	44	12006044	49476	21023	7857.61	62641.4
1	2006	56	12006056	8421	46709.7	8421	46709.7
1	2006	71	12006071	246	1667.29	246	1667.29
1	2006	75	12006075	739	100.85	0	839.85
1	2006	79	12006079	0	13.7013	0	13.7013
1	2006	89	12006089	0	3.20535	0	3.20535
1	2006	103	12006103	0	258.951	0	258.951
1	2006	108	12006108	3161	4.89606	0	3165.9
1	2006	116	12006116	539477	9209.51	1236.38	547450
1	2006	125	12006125	0	12.3141	0	12.3141
1	2006	156	12006156	0	533881	0	533881
1	2006	157	12006157	18000	56613.3	18000	56613.3
1	2006	160	12006160	0	1	0	1
1	2006	176	12006176	3717	170.183	0	3887.18
1	2006	187	12006187	127	1923.39	0	2050.39
1	2006	191	12006191	0	214	0	214
1	2006	201	12006201	22	1934	0	1956
1	2006	211	12006211	100	4.20343	0	104.203
1	2006	217	12006217	0	1.33	0	1.33
1	2006	221	12006221	0	87.3378	0	87.3378
1	2006	222	12006222	0	15.028	0	15.028
1	2006	223	12006223	0	114.39	0	114.39
1	2006	225	12006225	0	290	0	290
1	2006	234	12006234	0	45.655	0	45.655
1	2006	236	12006236	0	12600.4	0	12600.4
1	2006	242	12006242	0	1806.37	0	1806.37
1	2006	249	12006249	0	4421.55	0	4421.55
1	2006	254	12006254	0	11551.5	0	11551.5
1	2006	256	12006256	0	2192.86	0	2192.86
1	2006	257	12006257	0	127.507	0	127.507
1	2006	260	12006260	0	5330.87	0	5330.87
1	2006	265	12006265	0	17.335	0	17.335
1	2006	267	12006267	0	52564.1	0	52564.1
1	2006	270	12006270	0	90.1869	0	90.1869
1	2006	289	12006289	0	1454.97	0	1454.97
1	2006	292	12006292	0	13.6867	0	13.6867
1	2006	296	12006296	0	0.676926	0	0.676926
1	2006	328	12006328	0	7322.72	0	7322.72
1	2006	333	12006333	0	18.1993	0	18.1993
1	2006	339	12006339	0	157.098	0	157.098
1	2006	358	12006358	115934	0	0	115934
1	2006	388	12006388	319285	3076.65	24551	297811
1	2006	393	12006393	7043	0	0	7043
1	2006	397	12006397	72629	116.055	0	72745.1
1	2006	399	12006399	0	15.4471	0	15.4471
1	2006	401	12006401	0	16.0178	0	16.0178
1	2006	403	12006403	62234	4995.39	0	67229.4
1	2006	406	12006406	9198	10.0901	0	9208.09
1	2006	417	12006417	796	0	0	796
1	2006	426	12006426	16030	0	0	16030
1	2006	446	12006446	0	588.693	0	588.693
1	2006	449	12006449	0	101.459	0	101.459
1	2006	463	12006463	176900	435.094	156.448	177179
1	2006	486	12006486	0	7686.01	0	7686.01
1	2006	490	12006490	0	12535.4	0	12535.4
1	2006	495	12006495	0	2222	0	2222
1	2006	497	12006497	0	446.673	0	446.673
1	2006	507	12006507	0	784.885	0	784.885
1	2006	512	12006512	0	29.0266	0	29.0266
1	2006	515	12006515	160800	1389.03	816.28	161373
1	2006	521	12006521	36100	2.41476	0	36102.4
1	2006	523	12006523	0	0.961856	0	0.961856
1	2006	526	12006526	13000	55.7809	1932.45	11123.3
1	2006	531	12006531	8000	0	264	7736
1	2006	534	12006534	30000	0	135	29865
1	2006	536	12006536	15000	9.3355	91	14918.3
1	2006	541	12006541	11800	0	0	11800
1	2006	558	12006558	3000	5	0	3005
1	2006	560	12006560	201371	5197.18	851.118	205717
1	2006	567	12006567	134935	528	0	135463
1	2006	568	12006568	0	16.4603	0	16.4603
1	2006	569	12006569	0	9.82316	0	9.82316
1	2006	571	12006571	0	0.87263	0	0.87263
1	2006	574	12006574	0	3947.41	0	3947.41
1	2006	577	12006577	0	422.599	0	422.599
1	2006	592	12006592	0	336.497	0	336.497
1	2006	603	12006603	2000	43	0	2043
1	2006	619	12006619	6300	1197.96	3253.14	4244.81
1	2006	656	12006656	0	8200.06	0	8200.06
1	2006	661	12006661	0	2142.09	0	2142.09
1	2006	667	12006667	0	187.343	0	187.343
1	2006	677	12006677	0	28.4689	0	28.4689
1	2006	687	12006687	0	53.6103	0	53.6103
1	2006	689	12006689	0	14.2372	0	14.2372
1	2006	692	12006692	0	3.96861	0	3.96861
1	2006	693	12006693	0	2.79916	0	2.79916
1	2006	698	12006698	0	1.4147	0	1.4147
1	2006	702	12006702	0	0.905084	0	0.905084
1	2006	711	12006711	0	7.14439	0	7.14439
1	2006	723	12006723	0	16.4409	0	16.4409
1	2006	767	12006767	0	277.812	0	277.812
1	2006	777	12006777	0	0.220517	0	0.220517
1	2006	780	12006780	0	1	0	1
1	2006	826	12006826	171	3480.3	171	3480.3
1	2006	836	12006836	0	23.0596	0	23.0596
1	2006	999	12006999	0	5238	0	5238
1	2007	15	12007015	254233	504702	9688.89	749246
1	2007	27	12007027	0	62965.2	0	62965.2
1	2007	44	12007044	162533	14295.2	21055.3	155773
1	2007	56	12007056	18860	107151	18860	107151
1	2007	71	12007071	895	2813.84	816.696	2892.14
1	2007	75	12007075	1470	174.909	0	1644.91
1	2007	79	12007079	0	72.7315	0	72.7315
1	2007	89	12007089	0	1.77026	0	1.77026
1	2007	97	12007097	0	5801	0	5801
1	2007	103	12007103	0	353.778	0	353.778
1	2007	108	12007108	9530	36.9391	0	9566.94
1	2007	116	12007116	583934	17638	1078.64	600493
1	2007	125	12007125	0	0.711258	0	0.711258
1	2007	156	12007156	0	796907	0	796907
1	2007	157	12007157	27000	77246.6	27000	77246.6
1	2007	176	12007176	4951	211.334	1	5161.33
1	2007	187	12007187	78	2425.01	0	2503.01
1	2007	191	12007191	0	115.921	0	115.921
1	2007	201	12007201	25	2064.39	0	2089.39
1	2007	211	12007211	109	3.20755	0	112.208
1	2007	217	12007217	0	21.28	0	21.28
1	2007	220	12007220	0	0.472156	0	0.472156
1	2007	221	12007221	0	94.9428	0	94.9428
1	2007	222	12007222	4566	82.654	0	4648.65
1	2007	223	12007223	0	209.418	0	209.418
1	2007	225	12007225	414	119.381	0	533.381
1	2007	234	12007234	0	48.7959	0	48.7959
1	2007	236	12007236	0	23470.2	0	23470.2
1	2007	242	12007242	0	1718.47	0	1718.47
1	2007	249	12007249	0	4891	0	4891
1	2007	254	12007254	0	10598.3	0	10598.3
1	2007	256	12007256	0	2523.57	0	2523.57
1	2007	257	12007257	0	193.566	0	193.566
1	2007	260	12007260	0	10545	0	10545
1	2007	265	12007265	0	1.7429	0	1.7429
1	2007	267	12007267	0	60068.7	0	60068.7
1	2007	270	12007270	0	646.401	0	646.401
1	2007	289	12007289	0	1323.47	0	1323.47
1	2007	292	12007292	0	5.32645	0	5.32645
1	2007	296	12007296	0	0.641701	0	0.641701
1	2007	328	12007328	0	6382.62	0	6382.62
1	2007	333	12007333	0	124.606	0	124.606
1	2007	339	12007339	0	470.091	0	470.091
1	2007	358	12007358	132443	0	0	132443
1	2007	388	12007388	321472	2499.16	27049.1	296922
1	2007	393	12007393	8914	0	0	8914
1	2007	397	12007397	72109	368	0	72477
1	2007	399	12007399	0	22	0	22
1	2007	401	12007401	0	21.2478	0	21.2478
1	2007	403	12007403	56847	5796.22	0	62643.2
1	2007	406	12007406	9058	21.088	0	9079.09
1	2007	414	12007414	0	1.24653	0	1.24653
1	2007	417	12007417	437	1.37286	0	438.373
1	2007	420	12007420	0	20	0	20
1	2007	426	12007426	27236	0	0	27236
1	2007	446	12007446	0	973.795	0	973.795
1	2007	449	12007449	0	163.484	0	163.484
1	2007	463	12007463	216771	217.807	50.525	216938
1	2007	486	12007486	0	15088.2	0	15088.2
1	2007	490	12007490	0	10717.6	0	10717.6
1	2007	495	12007495	0	1216.83	0	1216.83
1	2007	497	12007497	0	646.239	0	646.239
1	2007	507	12007507	0	988.277	0	988.277
1	2007	512	12007512	0	72.0028	0	72.0028
1	2007	515	12007515	111836	1339.83	1120.96	112055
1	2007	521	12007521	27106	21.8024	0	27127.8
1	2007	523	12007523	1917	78	0	1995
1	2007	526	12007526	15681	59.5373	911.897	14828.6
1	2007	530	12007530	3586	0	0	3586
1	2007	531	12007531	3901	0	96	3805
1	2007	534	12007534	63868	9.47109	315	63562.5
1	2007	536	12007536	11226	189.459	214	11201.5
1	2007	541	12007541	833	0	0	833
1	2007	558	12007558	12949	0	0	12949
1	2007	560	12007560	218883	2913.8	1553.36	220243
1	2007	567	12007567	206295	392	0	206687
1	2007	568	12007568	0	55.4685	0	55.4685
1	2007	569	12007569	803	11.825	0	814.825
1	2007	574	12007574	0	2913.76	0	2913.76
1	2007	577	12007577	0	462.065	0	462.065
1	2007	592	12007592	0	423.269	0	423.269
1	2007	603	12007603	4900	26.9421	0	4926.94
1	2007	619	12007619	1554	1537.79	1554	1537.79
1	2007	656	12007656	0	9175.9	0	9175.9
1	2007	661	12007661	0	2396.09	0	2396.09
1	2007	667	12007667	0	230.699	0	230.699
1	2007	677	12007677	0	27.8746	0	27.8746
1	2007	687	12007687	0	48.0804	0	48.0804
1	2007	689	12007689	0	13.636	0	13.636
1	2007	693	12007693	0	0.64842	0	0.64842
1	2007	702	12007702	0	2.86763	0	2.86763
1	2007	711	12007711	0	7.36081	0	7.36081
1	2007	723	12007723	0	25.6899	0	25.6899
1	2007	767	12007767	0	463.562	0	463.562
1	2007	780	12007780	0	1	0	1
1	2007	826	12007826	268	4348.45	268	4348.45
1	2007	999	12007999	0	8373	0	8373
1	2008	15	12008015	225734	334073	19103.9	540703
1	2008	27	12008027	0	42334.7	0	42334.7
1	2008	44	12008044	149091	9929.42	1094.88	157926
1	2008	56	12008056	21172	101719	10566	112325
1	2008	71	12008071	864	3499.86	762.663	3601.2
1	2008	75	12008075	1624	307.586	3.774	1927.81
1	2008	79	12008079	0	21.5125	0	21.5125
1	2008	89	12008089	0	10.1571	0	10.1571
1	2008	103	12008103	0	469.623	0	469.623
1	2008	108	12008108	10697	93.1276	5.56851	10784.6
1	2008	116	12008116	648562	18834.3	41624.2	625772
1	2008	125	12008125	0	6.0875	0	6.0875
1	2008	156	12008156	0	965285	0	965285
1	2008	157	12008157	30000	70711.4	30000	70711.4
1	2008	176	12008176	5903	65.5587	0	5968.56
1	2008	187	12008187	125	2461	0	2586
1	2008	191	12008191	0	138.166	0	138.166
1	2008	201	12008201	11	1622.51	0	1633.51
1	2008	211	12008211	132	4.97932	0	136.979
1	2008	217	12008217	0	26.6	0	26.6
1	2008	221	12008221	0	103.257	0	103.257
1	2008	222	12008222	3974	73.037	5.65219	4041.38
1	2008	223	12008223	0	165.597	0	165.597
1	2008	225	12008225	497	151.436	0	648.436
1	2008	234	12008234	0	78.453	0	78.453
1	2008	236	12008236	0	21445.6	0	21445.6
1	2008	242	12008242	0	2034.51	0	2034.51
1	2008	249	12008249	0	4328.24	0	4328.24
1	2008	254	12008254	0	6973.66	0	6973.66
1	2008	256	12008256	0	1618.61	0	1618.61
1	2008	257	12008257	0	543	0	543
1	2008	260	12008260	0	3986.44	0	3986.44
1	2008	265	12008265	0	11.2388	0	11.2388
1	2008	267	12008267	0	74864.3	0	74864.3
1	2008	270	12008270	0	787.89	0	787.89
1	2008	289	12008289	0	1228.32	0	1228.32
1	2008	292	12008292	0	17.0955	0	17.0955
1	2008	328	12008328	0	8984.91	0	8984.91
1	2008	333	12008333	0	76.5036	0	76.5036
1	2008	339	12008339	0	8.90777	0	8.90777
1	2008	358	12008358	122702	14.951	0	122717
1	2008	388	12008388	293784	3045.25	9120.94	287708
1	2008	393	12008393	6849	0	0	6849
1	2008	397	12008397	81819	161	5.80446	81974.2
1	2008	399	12008399	0	20	0	20
1	2008	401	12008401	0	23.2236	0	23.2236
1	2008	403	12008403	61449	4282.55	0	65731.6
1	2008	406	12008406	9180	37.627	0	9217.63
1	2008	417	12008417	284	0	0	284
1	2008	426	12008426	26970	2.3778	0	26972.4
1	2008	446	12008446	0	1530.75	0	1530.75
1	2008	449	12008449	0	243.376	0	243.376
1	2008	463	12008463	222301	172.964	138.829	222335
1	2008	486	12008486	0	7040.87	0	7040.87
1	2008	490	12008490	0	10029	0	10029
1	2008	495	12008495	0	2047.92	0	2047.92
1	2008	497	12008497	0	697.869	0	697.869
1	2008	507	12008507	0	2006.59	0	2006.59
1	2008	512	12008512	0	32.4446	0	32.4446
1	2008	515	12008515	117199	1986.8	1192.78	117993
1	2008	521	12008521	29322	36.1001	0	29358.1
1	2008	523	12008523	1332	1	0	1333
1	2008	526	12008526	83089	75.637	5280	77884.6
1	2008	530	12008530	3799	0	0	3799
1	2008	531	12008531	6598	0	201	6397
1	2008	534	12008534	41651	16.8939	271	41396.9
1	2008	536	12008536	12077	125.057	270	11932.1
1	2008	541	12008541	1271	0	0	1271
1	2008	558	12008558	15506	0	0	15506
1	2008	560	12008560	185832	2860.71	2425.03	186268
1	2008	567	12008567	182159	529	0	182688
1	2008	568	12008568	0	23.757	0	23.757
1	2008	569	12008569	313	74.3375	0	387.337
1	2008	574	12008574	0	2542.32	0	2542.32
1	2008	577	12008577	0	527	0	527
1	2008	592	12008592	0	241.852	0	241.852
1	2008	603	12008603	4400	46.6202	0	4446.62
1	2008	619	12008619	1206	1721.88	1206	1721.88
1	2008	656	12008656	0	9843.47	0	9843.47
1	2008	661	12008661	0	3172.87	0	3172.87
1	2008	667	12008667	0	258.243	0	258.243
1	2008	677	12008677	0	31.0247	0	31.0247
1	2008	687	12008687	0	93.4263	0	93.4263
1	2008	689	12008689	0	15.2466	0	15.2466
1	2008	692	12008692	0	1.90025	0	1.90025
1	2008	693	12008693	0	3.66784	0	3.66784
1	2008	698	12008698	0	0.613437	0	0.613437
1	2008	702	12008702	0	2.86846	0	2.86846
1	2008	711	12008711	0	1.62115	0	1.62115
1	2008	723	12008723	0	29.9935	0	29.9935
1	2008	767	12008767	0	159.125	0	159.125
1	2008	780	12008780	0	8.45476	0	8.45476
1	2008	821	12008821	0	0.259492	0	0.259492
1	2008	826	12008826	538	3168.93	538	3168.93
1	2008	999	12008999	0	7460	0	7460
1	2009	15	12009015	198080	390977	8847.94	580209
1	2009	27	12009027	0	40690.6	0	40690.6
1	2009	44	12009044	145141	10958	1384.43	154715
1	2009	56	12009056	15232	83001.7	180.114	98053.6
1	2009	71	12009071	543	2583.26	488.051	2638.21
1	2009	75	12009075	1655.3	630.192	0	2285.49
1	2009	79	12009079	0	17.556	0	17.556
1	2009	89	12009089	0	20.6658	0	20.6658
1	2009	103	12009103	0	282.499	0	282.499
1	2009	108	12009108	8425.3	7.24573	6.84172	8425.7
1	2009	116	12009116	593551	9668.69	37967.5	565252
1	2009	122	12009122	0	0.702164	0	0.702164
1	2009	125	12009125	0	25.739	0	25.739
1	2009	156	12009156	0	633212	0	633212
1	2009	157	12009157	10000	61992.8	10000	61992.8
1	2009	176	12009176	5549.4	95.3912	0	5644.79
1	2009	187	12009187	124	2024	0	2148
1	2009	191	12009191	0	287.599	0	287.599
1	2009	201	12009201	5.3	1636	0	1641.3
1	2009	211	12009211	104	0.345654	0	104.346
1	2009	216	12009216	0	1.49852	0	1.49852
1	2009	217	12009217	0	36.28	0	36.28
1	2009	220	12009220	0	1.02062	0	1.02062
1	2009	221	12009221	0	192.544	0	192.544
1	2009	222	12009222	3789	148.401	0	3937.4
1	2009	223	12009223	0	14.8682	0	14.8682
1	2009	225	12009225	544	146.674	0	690.674
1	2009	234	12009234	0	28.9085	0	28.9085
1	2009	236	12009236	0	16713.3	0	16713.3
1	2009	242	12009242	0	2704.2	0	2704.2
1	2009	249	12009249	0	5602.49	0	5602.49
1	2009	254	12009254	0	12031	0	12031
1	2009	256	12009256	0	2759.81	0	2759.81
1	2009	257	12009257	0	810.5	0	810.5
1	2009	260	12009260	0	3644.98	0	3644.98
1	2009	265	12009265	0	15	0	15
1	2009	267	12009267	0	65906.7	0	65906.7
1	2009	270	12009270	0	3.47974	0	3.47974
1	2009	289	12009289	0	1369.01	0	1369.01
1	2009	292	12009292	0	14.6135	0	14.6135
1	2009	328	12009328	0	8316.77	0	8316.77
1	2009	333	12009333	0	1.48527	0	1.48527
1	2009	358	12009358	115889	138.997	0	116028
1	2009	388	12009388	278582	2396.22	3762.38	277216
1	2009	393	12009393	9187	0	0	9187
1	2009	397	12009397	80944	127.433	6	81065.4
1	2009	399	12009399	0	7	0	7
1	2009	401	12009401	0	13.9117	0	13.9117
1	2009	403	12009403	50416.2	4880.89	20	55277.1
1	2009	406	12009406	9261.9	14.8028	0	9276.7
1	2009	417	12009417	334.6	0	0	334.6
1	2009	426	12009426	23404.8	22.8889	0	23427.7
1	2009	446	12009446	0	882.678	0	882.678
1	2009	449	12009449	0	173.296	0	173.296
1	2009	463	12009463	251785	180.194	66.095	251899
1	2009	486	12009486	0	7382.15	0	7382.15
1	2009	490	12009490	0	4905	0	4905
1	2009	495	12009495	0	2836.7	0	2836.7
1	2009	497	12009497	0	723.289	0	723.289
1	2009	507	12009507	0	983.84	0	983.84
1	2009	512	12009512	0	327.11	0	327.11
1	2009	515	12009515	120844	1442.16	1703.85	120582
1	2009	521	12009521	28247	66.9039	1	28312.9
1	2009	523	12009523	1432	41	0	1473
1	2009	526	12009526	80643	106.68	8268.64	72481
1	2009	530	12009530	3698	0	0	3698
1	2009	531	12009531	7682	0	599	7083
1	2009	534	12009534	57883	0	654	57229
1	2009	536	12009536	10344	87.2076	314	10117.2
1	2009	541	12009541	854	0	0	854
1	2009	558	12009558	14140	0	0	14140
1	2009	560	12009560	208649	4574.47	4221.66	209002
1	2009	567	12009567	216101	140	0	216241
1	2009	568	12009568	0	1.96959	0	1.96959
1	2009	569	12009569	520	119.306	42.8571	596.449
1	2009	571	12009571	0	2.78577	0	2.78577
1	2009	574	12009574	0	928.807	0	928.807
1	2009	577	12009577	0	389.258	0	389.258
1	2009	592	12009592	0	438.612	0	438.612
1	2009	603	12009603	4400	28.1794	0	4428.18
1	2009	619	12009619	1532	1466.97	1532	1466.97
1	2009	656	12009656	0	8728.44	0	8728.44
1	2009	661	12009661	0	2574.95	0	2574.95
1	2009	667	12009667	0	196.937	0	196.937
1	2009	677	12009677	0	2.76126	0	2.76126
1	2009	687	12009687	0	77.6797	0	77.6797
1	2009	689	12009689	0	22.1462	0	22.1462
1	2009	692	12009692	0	0.90906	0	0.90906
1	2009	693	12009693	0	2.25836	0	2.25836
1	2009	698	12009698	0	0.470377	0	0.470377
1	2009	702	12009702	0	3.16466	0	3.16466
1	2009	711	12009711	0	11.9277	0	11.9277
1	2009	720	12009720	0	0.254833	0	0.254833
1	2009	723	12009723	0	12.8856	0	12.8856
1	2009	767	12009767	0	317.608	0	317.608
1	2009	780	12009780	0	0.870069	0	0.870069
1	2009	826	12009826	1054.8	2813.02	873.492	2994.32
1	2009	999	12009999	0	6878	0	6878
1	2010	15	12010015	183500	366984	9394.94	541089
1	2010	27	12010027	0	35930.2	0	35930.2
1	2010	44	12010044	118574	42968.5	13070	148472
1	2010	56	12010056	12751	84761.6	6646.98	90865.6
1	2010	71	12010071	345	2773.83	0	3118.83
1	2010	75	12010075	2601	755.813	0	3356.81
1	2010	79	12010079	0	134.357	0	134.357
1	2010	103	12010103	0	402.885	0	402.885
1	2010	108	12010108	4200	16.0291	0	4216.03
1	2010	116	12010116	481956	14280.4	35905.8	460331
1	2010	125	12010125	0	152.278	0	152.278
1	2010	156	12010156	0	624657	0	624657
1	2010	157	12010157	10000	127394	10000	127394
1	2010	176	12010176	4185	161.548	0	4346.55
1	2010	187	12010187	164	2569	0	2733
1	2010	191	12010191	0	1139	0	1139
1	2010	201	12010201	36	2304.98	18	2322.98
1	2010	211	12010211	84	7.16656	0	91.1666
1	2010	217	12010217	0	42.56	0	42.56
1	2010	220	12010220	0	2.75133	0	2.75133
1	2010	221	12010221	0	147.099	0	147.099
1	2010	222	12010222	3800	46.299	0	3846.3
1	2010	223	12010223	0	103.841	0	103.841
1	2010	225	12010225	500	303.666	0	803.666
1	2010	234	12010234	0	11.6846	0	11.6846
1	2010	236	12010236	0	20463.9	0	20463.9
1	2010	242	12010242	0	4191.29	0	4191.29
1	2010	249	12010249	0	13320.5	0	13320.5
1	2010	254	12010254	0	8865.32	0	8865.32
1	2010	256	12010256	0	1993.25	0	1993.25
1	2010	257	12010257	0	474	0	474
1	2010	260	12010260	0	3221.88	0	3221.88
1	2010	265	12010265	0	6.29505	0	6.29505
1	2010	267	12010267	0	53544.9	0	53544.9
1	2010	270	12010270	0	6.90857	0	6.90857
1	2010	289	12010289	0	1766.04	0	1766.04
1	2010	292	12010292	0	12.8409	0	12.8409
1	2010	328	12010328	0	6976.34	0	6976.34
1	2010	333	12010333	0	31.9329	0	31.9329
1	2010	358	12010358	114279	0	629	113650
1	2010	388	12010388	251916	2579.83	2645.28	251851
1	2010	393	12010393	9931	0	0	9931
1	2010	394	12010394	0	6.89973	0	6.89973
1	2010	397	12010397	63282	355.546	1551	62086.5
1	2010	399	12010399	0	230	0	230
1	2010	401	12010401	0	58.9626	0	58.9626
1	2010	403	12010403	38282	7662.26	0	45944.3
1	2010	406	12010406	8810	346.904	19	9137.9
1	2010	407	12010407	0	0.685333	0	0.685333
1	2010	414	12010414	0	1.56014	0	1.56014
1	2010	417	12010417	163	0	0	163
1	2010	426	12010426	20414	0	0	20414
1	2010	446	12010446	0	1224.59	0	1224.59
1	2010	449	12010449	0	99.3923	0	99.3923
1	2010	463	12010463	200517	218.226	179.072	200556
1	2010	486	12010486	0	6717.38	0	6717.38
1	2010	490	12010490	0	9132.66	0	9132.66
1	2010	495	12010495	0	5047	0	5047
1	2010	497	12010497	0	972.168	0	972.168
1	2010	507	12010507	0	1531.5	0	1531.5
1	2010	512	12010512	0	430.598	0	430.598
1	2010	515	12010515	56487	2558.85	1584.8	57461.1
1	2010	521	12010521	16575	88.7469	0	16663.7
1	2010	523	12010523	739	8.12837	0	747.128
1	2010	526	12010526	7671	134.912	1993.61	5812.3
1	2010	530	12010530	1561	0	0	1561
1	2010	531	12010531	1672	56.831	243	1485.83
1	2010	534	12010534	23805	182.156	106	23881.2
1	2010	536	12010536	4014	201.81	152	4063.81
1	2010	541	12010541	300	0	0	300
1	2010	558	12010558	10084	0	0	10084
1	2010	560	12010560	222905	4404.84	5836.08	221474
1	2010	567	12010567	132506	455	0	132961
1	2010	568	12010568	0	12	0	12
1	2010	569	12010569	200	7.825	0	207.825
1	2010	571	12010571	0	5.51652	0	5.51652
1	2010	572	12010572	0	6.25726	0	6.25726
1	2010	574	12010574	0	878.055	0	878.055
1	2010	577	12010577	0	599	0	599
1	2010	592	12010592	0	364.16	0	364.16
1	2010	600	12010600	0	0.926125	0	0.926125
1	2010	603	12010603	5800	298.062	0	6098.06
1	2010	619	12010619	500	1574.6	500	1574.6
1	2010	656	12010656	0	9315.81	0	9315.81
1	2010	661	12010661	0	2267.56	0	2267.56
1	2010	667	12010667	0	278.36	0	278.36
1	2010	677	12010677	0	21.78	0	21.78
1	2010	687	12010687	0	117.311	0	117.311
1	2010	689	12010689	0	32.5404	0	32.5404
1	2010	692	12010692	0	1.79791	0	1.79791
1	2010	693	12010693	0	2.98208	0	2.98208
1	2010	698	12010698	0	1.4801	0	1.4801
1	2010	702	12010702	0	2.48342	0	2.48342
1	2010	711	12010711	0	3.69091	0	3.69091
1	2010	720	12010720	0	2.40654	0	2.40654
1	2010	723	12010723	0	52.0408	0	52.0408
1	2010	767	12010767	0	119.418	0	119.418
1	2010	780	12010780	0	7.05494	0	7.05494
1	2010	821	12010821	0	1.68617	0	1.68617
1	2010	826	12010826	1376	3000.87	500.983	3875.89
1	2010	836	12010836	0	8.65573	0	8.65573
1	2010	999	12010999	0	7362	0	7362
2	1992	15	21992015	1650000	72686.7	0	1.72269e+06
2	1992	27	21992027	300000	162715	0	462715
2	1992	44	21992044	200000	0	0	200000
2	1992	56	21992056	300000	0	0	300000
2	1992	79	21992079	20000	0	0	20000
2	1992	116	21992116	224000	5000	0	229000
2	1992	156	21992156	38000	470229	0	508229
2	1992	157	21992157	1000	11289.6	0	12289.6
2	1992	211	21992211	35000	0	1300	33700
2	1992	221	21992221	9900	0	351	9549
2	1992	222	21992222	5000	0	156.621	4843.38
2	1992	223	21992223	2100	0	104	1996
2	1992	234	21992234	1000	0	0	1000
2	1992	236	21992236	0	4615.32	0	4615.32
2	1992	254	21992254	0	55757.7	0	55757.7
2	1992	256	21992256	0	6788.63	0	6788.63
2	1992	257	21992257	0	1383.41	0	1383.41
2	1992	260	21992260	1100	0	0	1100
2	1992	267	21992267	16028	11877.7	0	27905.7
2	1992	289	21992289	28000	0	500	27500
2	1992	328	21992328	68000	12824	0	80824
2	1992	329	21992329	44000	0	0	44000
2	1992	333	21992333	13524	0	0	13524
2	1992	402	21992402	0	129.957	0	129.957
2	1992	463	21992463	380000	0	0	380000
2	1992	486	21992486	0	3424.82	0	3424.82
2	1992	490	21992490	11600	0	0	11600
2	1992	495	21992495	0	1615.61	0	1615.61
2	1992	512	21992512	5700	0	0	5700
2	1992	515	21992515	17200	0	1514.49	15685.5
2	1992	521	21992521	2081	0	0	2081
2	1992	526	21992526	36700	0	526.529	36173.5
2	1992	534	21992534	13800	0	0	13800
2	1992	536	21992536	34400	0	0	34400
2	1992	541	21992541	20700	0	0	20700
2	1992	558	21992558	51575	0	0	51575
2	1992	560	21992560	330000	0	92975.6	237024
2	1992	567	21992567	90000	0	0	90000
2	1992	568	21992568	22400	0	2500	19900
2	1992	569	21992569	9100	0	257.143	8842.86
2	1992	619	21992619	77000	0.66417	4832.64	72168
2	1992	667	21992667	0	5436.82	0	5436.82
2	1992	711	21992711	500	0	420	80
2	1992	767	21992767	22000	0	7000	15000
2	1992	826	21992826	0	691.818	0	691.818
2	1993	15	21993015	1940000	161848	0	2.10185e+06
2	1993	27	21993027	300000	75918.7	0	375919
2	1993	44	21993044	250000	0	0	250000
2	1993	56	21993056	470000	0	0	470000
2	1993	79	21993079	24163	0	0	24163
2	1993	116	21993116	228000	4000	0	232000
2	1993	156	21993156	38000	393282	0	431282
2	1993	157	21993157	1000	9958.46	0	10958.5
2	1993	211	21993211	40000	211.847	1000	39211.8
2	1993	221	21993221	9000	0	737	8263
2	1993	222	21993222	5000	0	110.93	4889.07
2	1993	223	21993223	2200	0	108	2092
2	1993	234	21993234	1000	0	0	1000
2	1993	236	21993236	0	1611.26	0	1611.26
2	1993	254	21993254	0	8592.61	0	8592.61
2	1993	256	21993256	0	2727.16	0	2727.16
2	1993	260	21993260	900	0	0	900
2	1993	267	21993267	15551	4077.95	0	19628.9
2	1993	289	21993289	24000	0	1200	22800
2	1993	328	21993328	68000	3729.53	0	71729.5
2	1993	329	21993329	44000	0	0	44000
2	1993	333	21993333	13121	0	0	13121
2	1993	402	21993402	0	63.0934	0	63.0934
2	1993	463	21993463	400000	432.074	1250	399182
2	1993	486	21993486	0	2915.83	0	2915.83
2	1993	490	21993490	10627	0	0	10627
2	1993	495	21993495	0	3700	0	3700
2	1993	512	21993512	6417	0	0	6417
2	1993	515	21993515	17000	0	1930.56	15069.4
2	1993	521	21993521	2051	0	0	2051
2	1993	526	21993526	37000	0	1241.65	35758.3
2	1993	534	21993534	13500	0	0	13500
2	1993	536	21993536	34000	0	0	34000
2	1993	541	21993541	20500	0	0	20500
2	1993	558	21993558	53590	0	0	53590
2	1993	560	21993560	330000	0	91772.4	238228
2	1993	567	21993567	91533	0	0	91533
2	1993	568	21993568	22000	0	1500	20500
2	1993	569	21993569	9000	0	772.183	8227.82
2	1993	577	21993577	0	87.8611	0	87.8611
2	1993	619	21993619	97601	0	4400	93201
2	1993	667	21993667	0	8979.56	0	8979.56
2	1993	687	21993687	0	22.2688	0	22.2688
2	1993	711	21993711	582	0	330	252
2	1993	767	21993767	22000	0	7000	15000
2	1993	826	21993826	0	1034.75	0	1034.75
2	1994	15	21994015	2050000	68984.7	0	2.11898e+06
2	1994	27	21994027	342000	76512.3	0	418512
2	1994	44	21994044	230000	0	0	230000
2	1994	56	21994056	500000	624.764	0	500625
2	1994	79	21994079	22000	0	0	22000
2	1994	116	21994116	219796	3300	0	223096
2	1994	156	21994156	38000	367633	0	405633
2	1994	157	21994157	1000	9435.9	0	10435.9
2	1994	211	21994211	45000	592.886	1700	43892.9
2	1994	221	21994221	9000	0	635	8365
2	1994	222	21994222	5000	0	0	5000
2	1994	223	21994223	2300	0	275	2025
2	1994	234	21994234	1000	0	0	1000
2	1994	236	21994236	0	863.766	0	863.766
2	1994	242	21994242	0	69.3854	0	69.3854
2	1994	249	21994249	0	43.8559	0	43.8559
2	1994	254	21994254	0	7257.92	0	7257.92
2	1994	256	21994256	0	1050.06	0	1050.06
2	1994	257	21994257	0	50	0	50
2	1994	260	21994260	1100	0	0	1100
2	1994	267	21994267	15000	1834.16	0	16834.2
2	1994	289	21994289	26000	60.0807	1000	25060.1
2	1994	328	21994328	68000	2496.61	0	70496.6
2	1994	329	21994329	44000	0	0	44000
2	1994	333	21994333	13332	0	0	13332
2	1994	402	21994402	0	7.28436	0	7.28436
2	1994	463	21994463	420000	237.091	9600	410637
2	1994	486	21994486	0	867.728	0	867.728
2	1994	490	21994490	11413	0	1000	10413
2	1994	495	21994495	0	1072.48	0	1072.48
2	1994	512	21994512	6953	0	0	6953
2	1994	515	21994515	17500	0	3458.23	14041.8
2	1994	521	21994521	2073	0	0	2073
2	1994	526	21994526	43184	0	1372.41	41811.6
2	1994	534	21994534	13700	0	0	13700
2	1994	536	21994536	34400	0	0	34400
2	1994	541	21994541	20700	0	0	20700
2	1994	558	21994558	58065	0	0	58065
2	1994	560	21994560	330000	0	85942.1	244058
2	1994	567	21994567	72850	0	0	72850
2	1994	568	21994568	15180	0	6	15174
2	1994	569	21994569	9100	0	1719.25	7380.75
2	1994	577	21994577	0	26.4254	0	26.4254
2	1994	619	21994619	110941	39.7929	5000	105981
2	1994	667	21994667	0	5612.27	0	5612.27
2	1994	687	21994687	0	55.5136	0	55.5136
2	1994	711	21994711	353	0	140	213
2	1994	723	21994723	0	141.062	0	141.062
2	1994	767	21994767	22000	0	7000	15000
2	1994	826	21994826	0	1145.93	0	1145.93
2	1995	15	21995015	2000000	106915	0	2.10691e+06
2	1995	27	21995027	390000	147333	0	537333
2	1995	44	21995044	200000	3540.1	0	203540
2	1995	56	21995056	530000	0	0	530000
2	1995	79	21995079	22985	0	0	22985
2	1995	116	21995116	235000	1700	0	236700
2	1995	156	21995156	38000	352244	0	390244
2	1995	157	21995157	1000	7786.94	0	8786.94
2	1995	211	21995211	50000	234.653	14500	35734.7
2	1995	221	21995221	9000	0	1332	7668
2	1995	222	21995222	5000	0	0	5000
2	1995	223	21995223	2400	0	150	2250
2	1995	234	21995234	1000	0	0	1000
2	1995	236	21995236	0	149915	0	149915
2	1995	242	21995242	0	12015.7	0	12015.7
2	1995	249	21995249	0	40.7721	0	40.7721
2	1995	254	21995254	0	10413.7	0	10413.7
2	1995	256	21995256	0	3198.4	0	3198.4
2	1995	257	21995257	0	850	0	850
2	1995	260	21995260	900	0	0	900
2	1995	267	21995267	12000	34811.1	0	46811.1
2	1995	289	21995289	24000	0	51	23949
2	1995	328	21995328	68000	7262.4	0	75262.4
2	1995	329	21995329	44000	0	0	44000
2	1995	333	21995333	13121	0	0	13121
2	1995	402	21995402	0	49.95	0	49.95
2	1995	463	21995463	460000	67.3555	13400	446667
2	1995	486	21995486	0	1865.85	0	1865.85
2	1995	490	21995490	10709	0	0	10709
2	1995	495	21995495	0	1200	0	1200
2	1995	512	21995512	6762	0	0	6762
2	1995	515	21995515	17053	0	4000	13053
2	1995	521	21995521	2115	0	0	2115
2	1995	526	21995526	37500	0	1133.8	36366.2
2	1995	534	21995534	14000	0	0	14000
2	1995	536	21995536	34500	0	0	34500
2	1995	541	21995541	20132	0	0	20132
2	1995	558	21995558	56471	0	0	56471
2	1995	560	21995560	330000	0	75280.4	254720
2	1995	567	21995567	77047	0	0	77047
2	1995	568	21995568	16376	0	0	16376
2	1995	569	21995569	8850	0	2714.02	6135.98
2	1995	577	21995577	0	4.96337	0	4.96337
2	1995	619	21995619	112716	0	4553.5	108162
2	1995	667	21995667	0	12381.6	0	12381.6
2	1995	687	21995687	0	80.4699	0	80.4699
2	1995	711	21995711	2000	0	1800	200
2	1995	723	21995723	0	16.937	0	16.937
2	1995	767	21995767	22000	0	7000	15000
2	1995	826	21995826	0	1301.97	0	1301.97
2	1996	15	21996015	2300000	120033	0	2.42003e+06
2	1996	27	21996027	340000	73976.9	0	413977
2	1996	44	21996044	220000	0	0	220000
2	1996	56	21996056	360000	254.335	0	360254
2	1996	79	21996079	18881	0	0	18881
2	1996	116	21996116	250373	1500	0	251873
2	1996	156	21996156	38000	316336	0	354336
2	1996	157	21996157	1000	5266.04	0	6266.04
2	1996	211	21996211	65000	0	27000	38000
2	1996	221	21996221	9000	0	1641.12	7358.88
2	1996	222	21996222	5000	0	3.75756	4996.24
2	1996	223	21996223	2500	0	230	2270
2	1996	234	21996234	1000	0	0	1000
2	1996	236	21996236	0	165266	0	165266
2	1996	242	21996242	0	7807.91	0	7807.91
2	1996	249	21996249	0	54.372	0	54.372
2	1996	254	21996254	0	1349.06	0	1349.06
2	1996	256	21996256	0	1294.86	0	1294.86
2	1996	257	21996257	0	350	0	350
2	1996	260	21996260	1100	0	0	1100
2	1996	267	21996267	13000	22660	0	35660
2	1996	289	21996289	22000	20.2064	0	22020.2
2	1996	328	21996328	68000	1872.73	0	69872.7
2	1996	329	21996329	44000	0	0	44000
2	1996	333	21996333	12948	0	0	12948
2	1996	463	21996463	480000	31.3741	26700	453331
2	1996	486	21996486	0	883.082	0	883.082
2	1996	490	21996490	12099	0	0	12099
2	1996	495	21996495	0	500	0	500
2	1996	512	21996512	7113	0	0	7113
2	1996	515	21996515	16880	0	791.312	16088.7
2	1996	521	21996521	2239	0	0	2239
2	1996	526	21996526	39392	0	896.638	38495.4
2	1996	534	21996534	14734	0	0	14734
2	1996	536	21996536	34658	0	0	34658
2	1996	541	21996541	21178	0	0	21178
2	1996	558	21996558	59404	0	0	59404
2	1996	560	21996560	330000	0	81846.4	248154
2	1996	567	21996567	88596	0	0	88596
2	1996	568	21996568	21495	0	0	21495
2	1996	569	21996569	9310	0	243.09	9066.91
2	1996	577	21996577	0	4	0	4
2	1996	619	21996619	115358	308.141	7976.75	107689
2	1996	667	21996667	0	7930.09	0	7930.09
2	1996	711	21996711	4200	0	4100	100
2	1996	723	21996723	0	10.8403	0	10.8403
2	1996	767	21996767	22000	0	7000	15000
2	1996	826	21996826	0	1980.7	0	1980.7
2	1997	15	21997015	2711000	155944	0	2.86694e+06
2	1997	27	21997027	400000	128746	0	528746
2	1997	44	21997044	250000	0	0	250000
2	1997	56	21997056	300000	2408.94	0	302409
2	1997	71	21997071	0	9.2829	0	9.2829
2	1997	79	21997079	21467	0	0	21467
2	1997	103	21997103	0	2.35893	0	2.35893
2	1997	116	21997116	235000	91.046	0	235091
2	1997	156	21997156	38000	436391	0	474391
2	1997	157	21997157	1000	9131.89	0	10131.9
2	1997	211	21997211	50000	0	16500	33500
2	1997	221	21997221	9000	0	1990	7010
2	1997	222	21997222	5000	0	1.887	4998.11
2	1997	223	21997223	2600	0	620	1980
2	1997	234	21997234	1000	0	0	1000
2	1997	236	21997236	0	22744.4	0	22744.4
2	1997	242	21997242	0	3954.68	0	3954.68
2	1997	249	21997249	0	578.485	0	578.485
2	1997	254	21997254	0	9737.37	0	9737.37
2	1997	256	21997256	0	1100.45	0	1100.45
2	1997	257	21997257	0	321.069	0	321.069
2	1997	260	21997260	900	0	0	900
2	1997	267	21997267	14000	5809.63	0	19809.6
2	1997	289	21997289	22000	185.555	126	22059.6
2	1997	328	21997328	68000	2464.68	0	70464.7
2	1997	329	21997329	44000	0	0	44000
2	1997	333	21997333	12929	0	0	12929
2	1997	463	21997463	500000	348.772	21000	479349
2	1997	486	21997486	0	2293.49	0	2293.49
2	1997	490	21997490	13483	0	0	13483
2	1997	495	21997495	0	5500	0	5500
2	1997	512	21997512	7980	0	0	7980
2	1997	515	21997515	17674	0	7614.73	10059.3
2	1997	521	21997521	2303	0	0	2303
2	1997	526	21997526	40496	0	2039.31	38456.7
2	1997	534	21997534	16171	0	0	16171
2	1997	536	21997536	34343	0	0	34343
2	1997	541	21997541	23761	0	0	23761
2	1997	558	21997558	66649	0	0	66649
2	1997	560	21997560	330000	0	76869.2	253131
2	1997	567	21997567	83969	0	0	83969
2	1997	568	21997568	29756	0	100	29656
2	1997	569	21997569	10000	0	1172.57	8827.43
2	1997	577	21997577	0	9.35202	0	9.35202
2	1997	619	21997619	116579	126.255	7590.72	109115
2	1997	656	21997656	0	66.6997	0	66.6997
2	1997	667	21997667	0	19775.1	0	19775.1
2	1997	711	21997711	2500	0	2400	100
2	1997	723	21997723	0	200.238	0	200.238
2	1997	767	21997767	22000	0	3000	19000
2	1997	826	21997826	0	543.883	0	543.883
2	1998	15	21998015	2834000	87554.1	0	2.92155e+06
2	1998	27	21998027	450000	113665	0	563665
2	1998	44	21998044	240000	0	0	240000
2	1998	56	21998056	330000	42735.1	0	372735
2	1998	71	21998071	0	9.39811	0	9.39811
2	1998	79	21998079	22599	0	0	22599
2	1998	103	21998103	0	2.5555	0	2.5555
2	1998	116	21998116	235000	135.3	0	235135
2	1998	156	21998156	38000	410772	0	448772
2	1998	157	21998157	1000	7754.58	0	8754.58
2	1998	211	21998211	41979	0	4500	37479
2	1998	221	21998221	9000	0	3300	5700
2	1998	222	21998222	5000	0	1.72178	4998.28
2	1998	223	21998223	2600	0	2050	550
2	1998	234	21998234	1000	0	0	1000
2	1998	236	21998236	0	70015.6	0	70015.6
2	1998	242	21998242	0	4467.68	0	4467.68
2	1998	254	21998254	0	9385.13	0	9385.13
2	1998	256	21998256	0	860.426	0	860.426
2	1998	257	21998257	0	639.899	0	639.899
2	1998	260	21998260	1100	0	0	1100
2	1998	267	21998267	16000	5298.99	0	21299
2	1998	289	21998289	22000	2984.76	45	24939.8
2	1998	328	21998328	68000	18126.6	0	86126.6
2	1998	329	21998329	44000	0	0	44000
2	1998	333	21998333	12948	0	0	12948
2	1998	463	21998463	520000	0.690995	57000	463001
2	1998	486	21998486	0	2231.17	0	2231.17
2	1998	490	21998490	12798	0	0	12798
2	1998	512	21998512	8542	0	0	8542
2	1998	515	21998515	17555	0	6366.88	11188.1
2	1998	521	21998521	2228	0	0	2228
2	1998	526	21998526	42462	0	7499.29	34962.7
2	1998	534	21998534	18485	0	0	18485
2	1998	536	21998536	35864	0	0	35864
2	1998	541	21998541	25435	0	0	25435
2	1998	558	21998558	71345	0	0	71345
2	1998	560	21998560	330000	0	76413.8	253586
2	1998	567	21998567	100974	0	0	100974
2	1998	568	21998568	36766	0	13.9338	36752.1
2	1998	569	21998569	17000	0	7220.33	9779.67
2	1998	577	21998577	0	20	0	20
2	1998	619	21998619	124793	69.5225	1900	122963
2	1998	667	21998667	0	18753.7	0	18753.7
2	1998	711	21998711	7100	0	7000	100
2	1998	723	21998723	0	11.8469	0	11.8469
2	1998	767	21998767	22000	0	4500	17500
2	1998	826	21998826	0	781.47	0	781.47
2	1999	15	21999015	2499000	189414	0	2.68841e+06
2	1999	27	21999027	280000	158344	0	438344
2	1999	44	21999044	216000	0	0	216000
2	1999	56	21999056	240000	75196.3	0	315196
2	1999	71	21999071	0	42.4621	0	42.4621
2	1999	79	21999079	18969	0	0	18969
2	1999	103	21999103	0	11.7946	0	11.7946
2	1999	116	21999116	235000	3755.23	0	238755
2	1999	156	21999156	38000	557529	0	595529
2	1999	157	21999157	1000	10343	0	11343
2	1999	211	21999211	44624	34.2918	14600	30058.3
2	1999	221	21999221	11000	0	2600	8400
2	1999	222	21999222	5000	0	15.096	4984.9
2	1999	223	21999223	2800	0	560	2240
2	1999	234	21999234	1000	0	0	1000
2	1999	236	21999236	0	143677	0	143677
2	1999	242	21999242	0	5427.93	0	5427.93
2	1999	249	21999249	0	44.4061	0	44.4061
2	1999	254	21999254	0	5762.82	0	5762.82
2	1999	256	21999256	0	549.281	0	549.281
2	1999	257	21999257	0	550	0	550
2	1999	260	21999260	900	0	0	900
2	1999	267	21999267	16095	5788.89	0	21883.9
2	1999	289	21999289	23000	5022.76	158	27864.8
2	1999	328	21999328	68000	26198.8	0	94198.8
2	1999	329	21999329	44000	0	0	44000
2	1999	333	21999333	13025	0	0	13025
2	1999	463	21999463	540000	809.766	32200	508610
2	1999	486	21999486	0	1372.56	0	1372.56
2	1999	490	21999490	13427	0	0	13427
2	1999	495	21999495	0	401	0	401
2	1999	512	21999512	8676	0	0	8676
2	1999	515	21999515	17772	0	7000	10772
2	1999	521	21999521	2198	0	0	2198
2	1999	526	21999526	35558	0	9960.33	25597.7
2	1999	534	21999534	20618	0	0	20618
2	1999	536	21999536	36047	0	0	36047
2	1999	541	21999541	25833	0	0	25833
2	1999	558	21999558	72462	0	0	72462
2	1999	560	21999560	330000	0	93034.7	236965
2	1999	567	21999567	111318	0	0	111318
2	1999	568	21999568	34066	0	300	33766
2	1999	569	21999569	15590	0	6857.14	8732.86
2	1999	577	21999577	0	931.796	0	931.796
2	1999	619	21999619	126747	676.355	19366	108057
2	1999	656	21999656	0	77.9989	0	77.9989
2	1999	667	21999667	0	12199.1	0	12199.1
2	1999	711	21999711	7000	0	6800	200
2	1999	723	21999723	0	0.609514	0	0.609514
2	1999	767	21999767	22000	0	7000	15000
2	1999	826	21999826	0	112.531	0	112.531
2	2000	15	22000015	1469000	948425	0	2417425
2	2000	27	22000027	260000	282543	0	542543
2	2000	44	22000044	74000	5268.77	0	79268.8
2	2000	56	22000056	115000	94507.1	0	209507
2	2000	71	22000071	0	77.3575	0	77.3575
2	2000	79	22000079	22000	0	0	22000
2	2000	103	22000103	0	19.6577	0	19.6577
2	2000	116	22000116	235000	14425.4	5898.62	243527
2	2000	156	22000156	38000	445621	0	483621
2	2000	157	22000157	1000	11207.8	0	12207.8
2	2000	211	22000211	45325	1263.07	23600	22988.1
2	2000	221	22000221	12000	0	6500	5500
2	2000	222	22000222	5000	0	35.1517	4964.85
2	2000	223	22000223	2800	0	1050	1750
2	2000	234	22000234	1000	0	0	1000
2	2000	236	22000236	0	142834	0	142834
2	2000	242	22000242	0	8427.97	0	8427.97
2	2000	249	22000249	0	23.5366	0	23.5366
2	2000	254	22000254	0	5199.44	0	5199.44
2	2000	256	22000256	0	626.333	0	626.333
2	2000	257	22000257	0	1600	0	1600
2	2000	260	22000260	1100	0	0	1100
2	2000	267	22000267	13987	9122.28	0	23109.3
2	2000	289	22000289	23000	8606.89	25	31581.9
2	2000	328	22000328	57000	42042.8	0	99042.8
2	2000	329	22000329	37000	0	0	37000
2	2000	333	22000333	11319	0	0	11319
2	2000	463	22000463	573415	3205.63	25300	551321
2	2000	486	22000486	0	516.347	0	516.347
2	2000	490	22000490	13840	0	0	13840
2	2000	495	22000495	0	3700	0	3700
2	2000	512	22000512	8363	0	0	8363
2	2000	515	22000515	16555	0	7500	9055
2	2000	521	22000521	2398	0	0	2398
2	2000	526	22000526	38207	0	5610.59	32596.4
2	2000	534	22000534	21451	0	0	21451
2	2000	536	22000536	38494	0	0	38494
2	2000	541	22000541	24900	0	0	24900
2	2000	558	22000558	69846	0	0	69846
2	2000	560	22000560	330000	0	91139.1	238861
2	2000	567	22000567	111819	0	4100	107719
2	2000	568	22000568	22500	0	1050	21450
2	2000	569	22000569	20000	0	7817.28	12182.7
2	2000	577	22000577	0	2200	0	2200
2	2000	619	22000619	122170	2732.17	20012.2	104890
2	2000	656	22000656	0	17.4293	0	17.4293
2	2000	667	22000667	0	15026.6	0	15026.6
2	2000	711	22000711	2500	0	2400	100
2	2000	767	22000767	18500	0	12000	6500
2	2000	826	22000826	0	1037.81	0	1037.81
2	2001	15	22001015	1597000	1.27973e+06	0	2.87673e+06
2	2001	27	22001027	242000	386267	0	628267
2	2001	44	22001044	87000	8141.94	0	95141.9
2	2001	56	22001056	160000	73805.6	0	233806
2	2001	71	22001071	0	84.9133	0	84.9133
2	2001	79	22001079	22000	0	0	22000
2	2001	103	22001103	0	25.555	0	25.555
2	2001	116	22001116	235000	6753	3704.38	238049
2	2001	156	22001156	38000	486963	0	524963
2	2001	157	22001157	1000	11711.2	0	12711.2
2	2001	211	22001211	49096	1015.41	13600	36511.4
2	2001	221	22001221	15000	0	11109.4	3890.58
2	2001	222	22001222	5000	0	94.35	4905.65
2	2001	223	22001223	2800	0	920	1880
2	2001	234	22001234	1000	0	0	1000
2	2001	236	22001236	0	141538	0	141538
2	2001	242	22001242	0	5309.69	0	5309.69
2	2001	254	22001254	0	7039.78	0	7039.78
2	2001	256	22001256	0	551.38	0	551.38
2	2001	257	22001257	0	226.999	0	226.999
2	2001	260	22001260	900	0	0	900
2	2001	267	22001267	13963	7038.17	0	21001.2
2	2001	289	22001289	23000	5791.34	0	28791.3
2	2001	328	22001328	57000	29077.5	0	86077.5
2	2001	329	22001329	37000	0	0	37000
2	2001	333	22001333	11300	0	0	11300
2	2001	463	22001463	688834	5127.47	23000	670961
2	2001	486	22001486	0	3468.61	0	3468.61
2	2001	490	22001490	13578	0	0	13578
2	2001	495	22001495	0	7500	0	7500
2	2001	512	22001512	8600	0	0	8600
2	2001	515	22001515	18016	0	18016	0
2	2001	521	22001521	2389	0	0	2389
2	2001	526	22001526	38000	0	5612.69	32387.3
2	2001	534	22001534	24432	0	0	24432
2	2001	536	22001536	38460	0	0	38460
2	2001	541	22001541	25606	0	0	25606
2	2001	558	22001558	71826	0	0	71826
2	2001	560	22001560	365000	0	83890.9	281109
2	2001	567	22001567	119957	0	4700	115257
2	2001	568	22001568	28000	0	3126.69	24873.3
2	2001	569	22001569	17000	0	3195.7	13804.3
2	2001	577	22001577	0	1846.48	0	1846.48
2	2001	619	22001619	125634	1959.91	14348.5	113245
2	2001	667	22001667	0	15829.4	0	15829.4
2	2001	711	22001711	1000	0	650	350
2	2001	767	22001767	18500	0	6400	12100
2	2001	826	22001826	0	1940.58	0	1940.58
2	2001	999	22001999	0	1000	0	1000
2	2002	15	22002015	2686000	1.08149e+06	0	3.76749e+06
2	2002	27	22002027	388000	264468	0	652468
2	2002	44	22002044	345000	3244.77	0	348245
2	2002	56	22002056	298000	74216.9	0	372217
2	2002	71	22002071	0	305.841	0	305.841
2	2002	79	22002079	20000	0	0	20000
2	2002	103	22002103	0	74.6994	0	74.6994
2	2002	116	22002116	230000	22883.7	4775.45	248108
2	2002	156	22002156	38000	716461	0	754461
[truncated: 360,453+ more rows]
