# Supplementary material for: Commercial Plant Production and Consumption Still Follow the Latitudinal Gradient in Species Diversity despite Economic Globalization
Source: PLoS One. 2016 Oct 5;11(10):e0163002. doi: 10.1371/journal.pone.0163002 (PMC5051709; doi:10.1371/journal.pone.0163002)
Supplement: S18 File — (XLSX) [file pone.0163002.s021.xlsx]

## Sheet: PD_FAO_outputAltThree_2014-05-2
country	year	PSVP	SRP	EP	PSVC	SRC	EC
1	1992	0.669637	94	0.353802	0.662394	111	0.373712
1	1993	0.669774	93	0.340602	0.667561	112	0.376557
1	1994	0.669774	93	0.349057	0.67146	117	0.395385
1	1995	0.669774	93	0.348168	0.687863	156	0.399049
1	1996	0.666226	95	0.355763	0.715436	172	0.380617
1	1997	0.666226	95	0.357729	0.702919	154	0.418565
1	1998	0.666226	95	0.361768	0.689022	142	0.42374
1	1999	0.666226	95	0.360409	0.720182	170	0.394089
1	2000	0.666226	95	0.362345	0.722129	172	0.388382
1	2001	0.666226	95	0.363337	0.71967	177	0.374293
1	2002	0.666226	95	0.362163	0.722568	180	0.371115
1	2003	0.663291	107	0.349433	0.729773	194	0.372547
1	2004	0.663291	107	0.355001	0.730587	194	0.388475
1	2005	0.663291	107	0.354349	0.728163	214	0.362023
1	2006	0.663291	107	0.351128	0.721984	216	0.364255
1	2007	0.658982	112	0.376409	0.720256	212	0.387856
1	2008	0.658982	112	0.375174	0.737747	219	0.367365
1	2009	0.658982	112	0.374094	0.726012	204	0.38721
1	2010	0.658982	112	0.373608	0.743784	219	0.384539
2	1992	0.671294	113	0.359778	0.700294	124	0.398946
2	1993	0.671294	113	0.360797	0.708794	126	0.398151
2	1994	0.671294	113	0.361068	0.720717	133	0.388971
2	1995	0.671294	113	0.363347	0.722742	135	0.390282
2	1996	0.671294	113	0.365032	0.704506	130	0.392534
2	1997	0.671294	113	0.364497	0.705697	134	0.396435
2	1998	0.671294	113	0.365396	0.707815	130	0.388814
2	1999	0.671294	113	0.366014	0.705697	134	0.389946
2	2000	0.671294	113	0.367522	0.696408	128	0.410482
2	2001	0.671294	113	0.36653	0.699971	123	0.412873
2	2002	0.671294	113	0.364593	0.715279	139	0.401366
2	2003	0.671294	113	0.368696	0.723727	144	0.394625
2	2004	0.671294	113	0.370034	0.713968	141	0.398406
2	2005	0.671294	113	0.36829	0.711158	140	0.399822
2	2006	0.671294	113	0.366125	0.711158	140	0.402613
2	2007	0.671294	113	0.365285	0.711158	140	0.400698
2	2008	0.671294	113	0.364928	0.711158	140	0.407968
2	2009	0.671294	113	0.363161	0.693756	125	0.421594
2	2010	0.671294	113	0.364271	0.689633	124	0.408144
3	1992	0.674106	116	0.457333	0.680907	123	0.474626
3	1993	0.669872	115	0.454184	0.684698	127	0.469685
3	1994	0.665383	114	0.454167	0.684585	128	0.488483
3	1995	0.664076	115	0.458361	0.683411	129	0.494152
3	1996	0.676281	103	0.518029	0.718222	227	0.384103
3	1997	0.675848	123	0.452245	0.711402	219	0.384579
3	1998	0.676281	103	0.523051	0.704407	156	0.483772
3	1999	0.676281	103	0.523711	0.721818	236	0.392686
3	2000	0.676281	103	0.525713	0.720894	238	0.37721
3	2001	0.676281	103	0.526639	0.725201	246	0.381949
3	2002	0.675848	123	0.456197	0.727877	234	0.400795
3	2003	0.675093	124	0.457227	0.728235	229	0.410658
3	2004	0.677994	129	0.465396	0.714471	217	0.43554
3	2005	0.677994	129	0.467461	0.731612	232	0.407673
3	2006	0.675507	133	0.478525	0.716066	228	0.405628
3	2007	0.675507	133	0.480536	0.709979	232	0.406529
3	2008	0.675507	133	0.483312	0.727009	240	0.401753
3	2009	0.675507	133	0.483723	0.732331	220	0.433082
3	2010	0.675507	133	0.482853	0.713268	227	0.420067
4	1992	0.660031	118	0.471277	0.703874	204	0.401096
4	1993	0.660031	118	0.474891	0.739011	189	0.414903
4	1994	0.655592	117	0.471602	0.731055	200	0.404158
4	1995	0.660031	118	0.47094	0.738366	237	0.368147
4	1996	0.65756	120	0.47441	0.736869	211	0.410339
4	1997	0.65756	120	0.477902	0.736399	200	0.42138
4	1998	0.65756	120	0.476331	0.728553	195	0.427649
4	1999	0.65756	120	0.473503	0.724583	225	0.36888
4	2000	0.65756	120	0.47754	0.736132	207	0.404393
4	2001	0.65756	120	0.472855	0.731567	231	0.386421
4	2002	0.653188	119	0.474712	0.733531	239	0.390674
4	2003	0.653188	119	0.471506	0.730649	247	0.383663
4	2004	0.663222	121	0.472739	0.731171	242	0.389226
4	2005	0.663222	121	0.473256	0.727386	237	0.384658
4	2006	0.663222	121	0.473062	0.727866	233	0.401593
4	2007	0.663222	121	0.474	0.742838	250	0.387217
4	2008	0.663222	121	0.474073	0.748919	247	0.384283
4	2009	0.663222	121	0.472064	0.748106	251	0.384725
4	2010	0.663222	121	0.474408	0.744721	250	0.387766
5	1992	0.758104	57	0.274364	0.776715	76	0.410274
5	1993	0.758104	57	0.275041	0.778885	74	0.40749
5	1994	0.756647	58	0.27576	0.778885	74	0.40103
5	1995	0.756647	58	0.273941	0.780242	73	0.391805
5	1996	0.756647	58	0.27228	0.780003	77	0.393334
5	1997	0.756647	58	0.272377	0.780003	77	0.38487
5	1998	0.760654	56	0.369612	0.765085	94	0.377123
5	1999	0.760654	56	0.385922	0.765085	94	0.37915
5	2000	0.760654	56	0.390824	0.765085	94	0.396689
5	2001	0.760654	56	0.392666	0.765085	94	0.382497
5	2002	0.760654	56	0.393428	0.755897	101	0.369625
5	2003	0.763802	41	0.475698	0.755897	101	0.346302
5	2004	0.763802	41	0.471456	0.755897	101	0.343354
5	2005	0.763802	41	0.465618	0.760708	97	0.342353
5	2006	0.749481	62	0.347562	0.758848	98	0.353471
5	2007	0.749481	62	0.349667	0.760708	97	0.345086
5	2008	0.749481	62	0.349364	0.760708	97	0.35784
5	2009	0.749481	62	0.346197	0.760708	97	0.351593
5	2010	0.749481	62	0.347659	0.760708	97	0.363561
7	1992	0.728723	96	0.341077	0.751471	113	0.387617
7	1993	0.728723	96	0.340811	0.752386	114	0.396247
7	1994	0.728723	96	0.340718	0.752386	114	0.396945
7	1995	0.728723	96	0.341645	0.751471	113	0.392243
7	1996	0.728723	96	0.340243	0.754304	111	0.395545
7	1997	0.728723	96	0.340371	0.752386	114	0.397554
7	1998	0.728723	96	0.342072	0.752386	114	0.400956
7	1999	0.728723	96	0.338772	0.751471	113	0.389557
7	2000	0.728723	96	0.341085	0.751471	113	0.39711
7	2001	0.728723	96	0.34432	0.751471	113	0.399564
7	2002	0.728723	96	0.342979	0.767222	168	0.337442
7	2003	0.728723	96	0.341692	0.753896	163	0.335643
7	2004	0.728723	96	0.342291	0.7351	167	0.335415
7	2005	0.728723	96	0.343	0.730235	184	0.300013
7	2006	0.728723	96	0.34363	0.73858	189	0.290942
7	2007	0.728723	96	0.343905	0.753325	195	0.284687
7	2008	0.728723	96	0.341935	0.753325	195	0.283843
7	2009	0.728723	96	0.343662	0.753325	195	0.2891
7	2010	0.728723	96	0.346671	0.752645	193	0.287141
8	1992	0.707962	85	0.394979	0.725613	150	0.378067
8	1993	0.707962	85	0.39818	0.727509	143	0.399875
8	1994	0.707962	85	0.399864	0.725546	150	0.377335
8	1995	0.707962	85	0.397445	0.725115	141	0.399471
8	1996	0.707962	85	0.401909	0.724954	151	0.368469
8	1997	0.707962	85	0.40144	0.728303	152	0.373263
8	1998	0.707962	85	0.398514	0.738374	138	0.417906
8	1999	0.707962	85	0.402298	0.736382	149	0.409855
8	2000	0.707962	85	0.391637	0.733133	148	0.421022
8	2001	0.707962	85	0.400429	0.727761	141	0.437984
8	2002	0.707962	85	0.397983	0.736382	149	0.406127
8	2003	0.707962	85	0.397373	0.740305	140	0.425906
8	2004	0.707962	85	0.397548	0.737069	148	0.41615
8	2005	0.707962	85	0.394343	0.740895	237	0.384532
8	2006	0.707962	85	0.393295	0.739799	199	0.378864
8	2007	0.707962	85	0.394475	0.754656	199	0.391766
8	2008	0.707962	85	0.392431	0.754656	199	0.38674
8	2009	0.707962	85	0.392801	0.752911	198	0.380934
8	2010	0.707962	85	0.397075	0.737968	188	0.39454
9	1992	0.73803	143	0.544624	0.742972	244	0.414585
9	1993	0.73803	143	0.546277	0.740077	243	0.426227
9	1994	0.73803	143	0.543258	0.736302	237	0.433142
9	1995	0.73803	143	0.541235	0.739754	233	0.437301
9	1996	0.73803	143	0.539057	0.742151	236	0.431384
9	1997	0.73803	143	0.542565	0.737649	238	0.43086
9	1998	0.73803	143	0.541877	0.741881	242	0.424751
9	1999	0.73803	143	0.543875	0.736104	242	0.440716
9	2000	0.73803	143	0.545979	0.742489	235	0.444945
9	2001	0.73803	143	0.547375	0.737758	249	0.420533
9	2002	0.73803	143	0.549401	0.741257	230	0.427285
9	2003	0.73803	143	0.549341	0.741172	229	0.429048
9	2004	0.73803	143	0.544733	0.737878	227	0.434914
9	2005	0.73803	143	0.544083	0.740924	230	0.429702
9	2006	0.73803	143	0.544164	0.742695	225	0.447562
9	2007	0.73803	143	0.543631	0.748683	217	0.458456
9	2008	0.73803	143	0.54329	0.744522	222	0.436136
9	2009	0.73803	143	0.544332	0.751929	223	0.437918
9	2010	0.73803	143	0.54049	0.740854	230	0.434039
10	1992	0.692472	166	0.477247	0.737192	271	0.421813
10	1993	0.692472	166	0.480659	0.725264	264	0.430133
10	1994	0.6961	161	0.483242	0.725973	263	0.43175
10	1995	0.6961	161	0.480238	0.724058	262	0.432395
10	1996	0.6961	161	0.480216	0.726808	261	0.431213
10	1997	0.6961	161	0.480103	0.739216	271	0.416178
10	1998	0.6961	161	0.481794	0.727819	263	0.428776
10	1999	0.6961	161	0.481206	0.724077	262	0.43382
10	2000	0.6961	161	0.48122	0.724886	260	0.433133
10	2001	0.6961	161	0.481396	0.725709	263	0.432702
10	2002	0.6961	161	0.484614	0.736329	269	0.429764
10	2003	0.6961	161	0.483132	0.738338	268	0.433581
10	2004	0.6961	161	0.486221	0.730357	261	0.452578
10	2005	0.6961	161	0.483545	0.731248	265	0.436087
10	2006	0.6961	161	0.486617	0.740464	268	0.441215
10	2007	0.6961	161	0.488112	0.727155	260	0.445642
10	2008	0.6961	161	0.491853	0.732252	257	0.451095
10	2009	0.6961	161	0.488609	0.732688	256	0.450065
10	2010	0.6961	161	0.487405	0.732252	257	0.452675
11	1992	0.664682	92	0.478107	0.738892	273	0.413174
11	1993	0.664682	92	0.478764	0.736893	277	0.404555
11	1994	0.664682	92	0.480942	0.739116	276	0.405329
11	1995	0.675746	95	0.500934	0.743219	279	0.413693
11	1996	0.707666	105	0.481513	0.7446	276	0.433338
11	1997	0.707666	105	0.481091	0.74158	279	0.425794
11	1998	0.706435	107	0.48265	0.740228	278	0.422583
11	1999	0.706435	107	0.485561	0.745803	282	0.424343
11	2000	0.706435	107	0.490483	0.743208	280	0.429362
11	2001	0.706435	107	0.483724	0.743208	280	0.432756
11	2002	0.706435	107	0.487768	0.744525	281	0.434939
11	2003	0.695309	127	0.477582	0.744826	279	0.450705
11	2004	0.695309	127	0.475338	0.744826	279	0.45494
11	2005	0.695309	127	0.475678	0.74346	283	0.449847
11	2006	0.695309	127	0.475419	0.74474	284	0.453147
11	2007	0.695309	127	0.476283	0.744499	280	0.45438
11	2008	0.695738	126	0.470507	0.744499	280	0.456232
11	2009	0.695738	126	0.467377	0.744499	280	0.456882
11	2010	0.698207	127	0.473949	0.744499	280	0.454696
12	1992	0.680661	51	0.346981	0.747301	186	0.339382
12	1993	0.680661	51	0.348587	0.744817	181	0.344819
12	1994	0.680661	51	0.352182	0.732884	179	0.357572
12	1995	0.680661	51	0.355329	0.723058	169	0.359526
12	1996	0.680661	51	0.352239	0.723058	169	0.36143
12	1997	0.680661	51	0.35599	0.735508	222	0.399377
12	1998	0.680661	51	0.353992	0.738149	207	0.401131
12	1999	0.680661	51	0.354123	0.736241	206	0.381909
12	2000	0.680661	51	0.351415	0.720899	248	0.404162
12	2001	0.680661	51	0.35118	0.733859	247	0.399038
12	2002	0.680661	51	0.353027	0.713395	190	0.395414
12	2003	0.680661	51	0.354467	0.706238	183	0.369999
12	2004	0.680661	51	0.354614	0.709173	191	0.364805
12	2005	0.680661	51	0.353981	0.733239	249	0.383777
12	2006	0.680661	51	0.353194	0.72243	243	0.396663
12	2007	0.680661	51	0.353203	0.733609	248	0.384671
12	2008	0.680661	51	0.354794	0.735784	247	0.389984
12	2009	0.680661	51	0.355233	0.735485	249	0.397217
12	2010	0.680661	51	0.357711	0.726109	240	0.404913
13	1992	0.625768	89	0.325626	0.720126	180	0.396636
13	1993	0.625768	89	0.322831	0.720126	180	0.396173
13	1994	0.625768	89	0.323768	0.720126	180	0.398051
13	1995	0.625768	89	0.320701	0.720126	180	0.390247
13	1996	0.625859	88	0.310154	0.720681	179	0.386872
13	1997	0.625859	88	0.307412	0.719044	181	0.423443
13	1998	0.624375	89	0.316034	0.717884	171	0.399346
13	1999	0.624375	89	0.317346	0.721584	175	0.404712
13	2000	0.624375	89	0.322466	0.730427	210	0.445144
13	2001	0.624375	89	0.318298	0.735925	219	0.444188
13	2002	0.624375	89	0.320974	0.744586	224	0.432855
13	2003	0.624375	89	0.314262	0.741266	233	0.431768
13	2004	0.624375	89	0.322777	0.740648	224	0.445632
13	2005	0.624644	90	0.330649	0.741563	232	0.445638
13	2006	0.624644	90	0.328522	0.737667	220	0.438157
13	2007	0.624644	90	0.327127	0.737532	234	0.432536
13	2008	0.624644	90	0.328537	0.737532	234	0.442615
13	2009	0.624644	90	0.328725	0.739129	238	0.421774
13	2010	0.624644	90	0.331531	0.740185	235	0.437316
14	1992	0.704239	102	0.282226	0.747649	224	0.350593
14	1993	0.701749	105	0.30443	0.765611	244	0.334623
14	1994	0.701749	105	0.300183	0.764204	247	0.340908
14	1995	0.701749	105	0.302394	0.765239	245	0.339989
14	1996	0.701749	105	0.299162	0.753909	240	0.354377
14	1997	0.701749	105	0.299776	0.7512	241	0.353656
14	1998	0.701749	105	0.318195	0.754407	234	0.339011
14	1999	0.701749	105	0.314056	0.756683	245	0.355797
14	2000	0.701749	105	0.316307	0.740258	229	0.368164
14	2001	0.701749	105	0.318403	0.75468	243	0.403409
14	2002	0.701749	105	0.313839	0.753763	245	0.401458
14	2003	0.701749	105	0.321098	0.752929	244	0.40376
14	2004	0.701749	105	0.31741	0.753325	243	0.383508
14	2005	0.701749	105	0.316363	0.750434	254	0.387052
14	2006	0.701749	105	0.316437	0.752648	254	0.378385
14	2007	0.701749	105	0.313244	0.752101	256	0.378752
14	2008	0.701749	105	0.313102	0.753308	252	0.379677
14	2009	0.701749	105	0.318858	0.752089	255	0.37994
14	2010	0.701749	105	0.320509	0.749766	251	0.389172
15	1992	0.67705	90	0.49678	0.743427	279	0.419368
15	1993	0.67705	90	0.499673	0.743481	274	0.419181
15	1994	0.67705	90	0.49331	0.746018	281	0.417285
15	1995	0.67705	90	0.493893	0.746117	276	0.418963
15	1996	0.67705	90	0.49266	0.744721	280	0.418132
15	1997	0.67705	90	0.486758	0.744721	280	0.416208
15	1998	0.67705	90	0.489455	0.746018	281	0.417824
15	1999	0.67705	90	0.488091	0.746305	280	0.420267
16	1992	0.72406	176	0.403487	0.740713	237	0.387939
16	1993	0.72406	176	0.401805	0.743214	234	0.386506
16	1994	0.72406	176	0.406892	0.733463	238	0.387469
16	1995	0.72406	176	0.404326	0.738729	247	0.386517
16	1996	0.72406	176	0.405609	0.732845	242	0.38972
16	1997	0.72406	176	0.406357	0.730184	241	0.384171
16	1998	0.72406	176	0.407469	0.732497	240	0.395396
16	1999	0.72406	176	0.406641	0.733275	227	0.39226
16	2000	0.72406	176	0.406524	0.730555	229	0.394885
16	2001	0.72406	176	0.406124	0.730624	230	0.402872
16	2002	0.72406	176	0.406163	0.736176	252	0.40252
16	2003	0.72406	176	0.406155	0.737103	248	0.410341
16	2004	0.72406	176	0.405936	0.730551	244	0.408051
16	2005	0.722948	177	0.411349	0.738451	251	0.394603
16	2006	0.722948	177	0.413256	0.734433	243	0.411624
16	2007	0.722948	177	0.413722	0.735679	242	0.410845
16	2008	0.722948	177	0.411245	0.737392	238	0.420525
16	2009	0.722948	177	0.411667	0.737472	238	0.414983
16	2010	0.722948	177	0.410854	0.733751	236	0.416143
17	1992	0.616385	40	0.317238	0.679638	100	0.409807
17	1993	0.616385	40	0.324166	0.679638	100	0.408688
17	1994	0.616385	40	0.32818	0.679638	100	0.398696
17	1995	0.616385	40	0.329403	0.679638	100	0.403989
17	1996	0.616385	40	0.332862	0.679638	100	0.400876
17	1997	0.616385	40	0.332459	0.679638	100	0.397423
17	1998	0.616385	40	0.323464	0.679638	100	0.402927
17	1999	0.616385	40	0.323077	0.67897	101	0.403635
17	2000	0.616385	40	0.323889	0.67897	101	0.41146
17	2001	0.616385	40	0.324286	0.67897	101	0.417593
17	2002	0.616385	40	0.327776	0.67897	101	0.415744
17	2003	0.616385	40	0.326445	0.67897	101	0.412919
17	2004	0.616385	40	0.322264	0.67897	101	0.405229
17	2005	0.616385	40	0.330001	0.67897	101	0.398339
17	2006	0.616385	40	0.328427	0.67897	101	0.416575
17	2007	0.616385	40	0.327353	0.698412	112	0.375648
17	2008	0.616385	40	0.331218	0.698412	112	0.38472
17	2009	0.616385	40	0.331032	0.698412	112	0.383057
17	2010	0.616385	40	0.33434	0.698412	112	0.401517
18	1992	0.737531	102	0.323857	0.743536	124	0.381526
18	1993	0.737531	102	0.324492	0.737184	171	0.318302
18	1994	0.737531	102	0.323398	0.734967	177	0.327566
18	1995	0.737531	102	0.322129	0.738147	171	0.320557
18	1996	0.737531	102	0.323254	0.73619	175	0.321659
18	1997	0.737531	102	0.322255	0.743071	154	0.357849
18	1998	0.737531	102	0.32276	0.742903	149	0.352507
18	1999	0.734822	106	0.354561	0.739903	153	0.372998
18	2000	0.734822	106	0.359751	0.739903	153	0.381538
18	2001	0.734822	106	0.358805	0.743445	141	0.398522
18	2002	0.734822	106	0.357423	0.743445	141	0.397388
18	2003	0.737255	118	0.394893	0.739171	149	0.425194
18	2004	0.735351	129	0.422981	0.738009	157	0.432257
18	2005	0.735351	129	0.425915	0.737681	158	0.438137
18	2006	0.735351	129	0.425371	0.74117	148	0.454069
18	2007	0.735351	129	0.424696	0.740884	149	0.457475
18	2008	0.735351	129	0.424554	0.740884	149	0.460133
18	2009	0.734836	130	0.427787	0.740422	150	0.465876
18	2010	0.734836	130	0.430176	0.731962	189	0.448079
19	1992	0.712346	147	0.466603	0.710327	194	0.41402
19	1993	0.712346	147	0.466722	0.708532	203	0.399592
19	1994	0.712346	147	0.466424	0.731614	224	0.366967
19	1995	0.712346	147	0.466665	0.72366	226	0.359542
19	1996	0.712346	147	0.465551	0.729398	228	0.362601
19	1997	0.712346	147	0.468596	0.710528	200	0.413385
19	1998	0.712346	147	0.469495	0.708826	204	0.402388
19	1999	0.712346	147	0.468846	0.706847	204	0.409113
19	2000	0.712346	147	0.468981	0.726882	241	0.371273
19	2001	0.712346	147	0.466832	0.730135	237	0.368847
19	2002	0.712346	147	0.46776	0.738581	238	0.36839
19	2003	0.712346	147	0.46615	0.721301	227	0.381421
19	2004	0.712346	147	0.462683	0.73109	223	0.381361
19	2005	0.712346	147	0.461871	0.71169	212	0.400982
19	2006	0.712346	147	0.458958	0.712256	225	0.37742
19	2007	0.712346	147	0.459588	0.719899	212	0.400322
19	2008	0.712346	147	0.459829	0.731328	217	0.39542
19	2009	0.712346	147	0.459011	0.725347	234	0.355649
19	2010	0.712346	147	0.460638	0.731142	212	0.406677
20	1992	0.705869	85	0.287811	0.734823	245	0.384358
20	1993	0.705869	85	0.29181	0.746259	247	0.379514
20	1994	0.705869	85	0.291025	0.736286	240	0.38749
20	1995	0.705869	85	0.284885	0.737741	237	0.385364
20	1996	0.705869	85	0.281267	0.733875	241	0.375932
20	1997	0.705869	85	0.279522	0.744887	257	0.374485
20	1998	0.705869	85	0.279772	0.735529	243	0.39968
20	1999	0.705869	85	0.280017	0.734571	248	0.399932
20	2000	0.705869	85	0.27462	0.735138	247	0.406209
20	2001	0.705869	85	0.263412	0.73267	246	0.409879
20	2002	0.705869	85	0.268153	0.734887	252	0.435973
20	2003	0.705869	85	0.271063	0.735097	230	0.445464
20	2004	0.705869	85	0.271525	0.72786	213	0.43884
20	2005	0.705869	85	0.268328	0.726325	218	0.416799
20	2006	0.705869	85	0.271534	0.724106	216	0.424216
20	2007	0.705869	85	0.268941	0.74144	231	0.413491
20	2008	0.705869	85	0.269239	0.745127	229	0.425532
20	2009	0.695861	82	0.266408	0.747632	240	0.406549
20	2010	0.695861	82	0.280097	0.74596	230	0.419056
21	1992	0.742485	171	0.440921	0.756242	260	0.371359
21	1993	0.742485	171	0.443124	0.753557	269	0.368284
21	1994	0.742485	171	0.439049	0.753784	277	0.361651
21	1995	0.742485	171	0.436857	0.753005	285	0.376147
21	1996	0.742485	171	0.438867	0.754458	285	0.373743
21	1997	0.742485	171	0.439427	0.753194	285	0.373053
21	1998	0.742485	171	0.439081	0.753194	285	0.377589
21	1999	0.742485	171	0.435262	0.751194	271	0.384912
21	2000	0.742485	171	0.435489	0.753997	265	0.393692
21	2001	0.742485	171	0.434991	0.757073	261	0.390662
21	2002	0.742485	171	0.435059	0.754772	266	0.387663
21	2003	0.742485	171	0.43548	0.750712	268	0.386278
21	2004	0.742485	171	0.434266	0.751913	274	0.384655
21	2005	0.744122	172	0.439099	0.75086	269	0.387144
21	2006	0.744122	172	0.438441	0.752823	274	0.389119
21	2007	0.744122	172	0.436718	0.749651	268	0.386809
21	2008	0.744122	172	0.434516	0.749651	268	0.383299
21	2009	0.744122	172	0.434619	0.754099	266	0.389296
21	2010	0.744122	172	0.437655	0.749651	268	0.393921
22	1992	0	0	0	0.718911	149	0.342123
22	1993	0	0	0	0.714017	157	0.326852
22	1994	0	0	0	0.715507	155	0.337573
22	1995	0	0	0	0.706659	150	0.33222
22	1996	0	0	0	0.712168	148	0.316154
22	1997	0	0	0	0.72671	140	0.342717
22	1998	0	0	0	0.729555	140	0.333898
22	1999	0	0	0	0.720509	107	0.377519
22	2000	0	0	0	0.726128	106	0.379402
22	2001	0	0	0	0.716328	99	0.408078
22	2002	0	0	0	0.717178	99	0.412517
22	2003	0	0	0	0.720545	96	0.408805
22	2004	0	0	0	0.704279	83	0.405735
22	2005	0	0	0	0.703584	84	0.397001
22	2006	0	0	0	0.712463	94	0.372375
22	2007	0	0	0	0.712105	95	0.374403
22	2008	0	0	0	0.712929	94	0.381438
22	2009	0	0	0	0.73081	208	0.39673
22	2010	0	0	0	0.731604	211	0.403323
23	1992	0.737427	94	0.385019	0.756788	172	0.38609
23	1993	0.735738	95	0.391699	0.745434	192	0.341112
23	1994	0.735738	95	0.370946	0.75772	193	0.329287
23	1995	0.746112	99	0.371722	0.762402	181	0.36326
23	1996	0.746112	99	0.366212	0.753242	194	0.337126
23	1997	0.746112	99	0.360035	0.763548	182	0.358033
23	1998	0.743112	102	0.364261	0.757154	167	0.379824
23	1999	0.736587	108	0.37734	0.75992	175	0.382516
23	2000	0.736587	108	0.383897	0.758572	192	0.381915
23	2001	0.736587	108	0.389642	0.753953	159	0.397856
23	2002	0.736587	108	0.393383	0.745083	168	0.367943
23	2003	0.736587	108	0.405014	0.75366	201	0.396125
23	2004	0.736587	108	0.389797	0.738655	196	0.364896
23	2005	0.736587	108	0.393758	0.753664	210	0.356149
23	2006	0.736587	108	0.39675	0.76006	194	0.37862
23	2007	0.736587	108	0.387711	0.759382	191	0.383105
23	2008	0.736587	108	0.396259	0.769409	194	0.370744
23	2009	0.736587	108	0.392367	0.774932	188	0.374959
23	2010	0.736587	108	0.391008	0.759411	203	0.368021
25	1992	0.723581	88	0.192591	0.738246	111	0.336105
25	1993	0.723581	88	0.191113	0.739599	110	0.326631
25	1994	0.723581	88	0.192559	0.739599	110	0.297619
25	1995	0.723581	88	0.192138	0.736252	109	0.339003
25	1996	0.723581	88	0.192716	0.739599	110	0.335785
25	1997	0.723581	88	0.194321	0.739599	110	0.29083
25	1998	0.723581	88	0.195863	0.739599	110	0.288706
25	1999	0.723581	88	0.196233	0.736252	109	0.30543
25	2000	0.723581	88	0.195091	0.739599	110	0.289674
25	2001	0.723581	88	0.195448	0.739599	110	0.291393
25	2002	0.723581	88	0.196507	0.756165	156	0.306478
25	2003	0.723581	88	0.197032	0.741327	153	0.284523
25	2004	0.723581	88	0.197435	0.748824	152	0.331228
25	2005	0.723581	88	0.197117	0.7398	169	0.29699
25	2006	0.723581	88	0.196761	0.732386	174	0.28731
25	2007	0.723581	88	0.196759	0.72883	177	0.266835
25	2008	0.723581	88	0.196942	0.7308	174	0.264385
25	2009	0.723581	88	0.197216	0.7308	174	0.262356
25	2010	0.723581	88	0.196627	0.73319	151	0.291067
26	1992	0.720746	80	0.413672	0.729803	218	0.344655
26	1993	0.720746	80	0.416347	0.731561	214	0.34221
26	1994	0.720746	80	0.415453	0.732836	225	0.365945
26	1995	0.720746	80	0.418468	0.730894	224	0.353271
26	1996	0.720746	80	0.421346	0.729475	226	0.373638
26	1997	0.720746	80	0.418109	0.73592	241	0.405152
26	1998	0.720746	80	0.41744	0.73592	241	0.398596
26	1999	0.720746	80	0.422052	0.733866	225	0.387865
26	2000	0.720746	80	0.420995	0.732129	224	0.391789
26	2001	0.720746	80	0.422037	0.733866	225	0.391554
26	2002	0.720746	80	0.418285	0.735393	243	0.423398
26	2003	0.720746	80	0.417835	0.73977	242	0.420917
26	2004	0.720746	80	0.419673	0.750586	251	0.398954
26	2005	0.720746	80	0.418563	0.75297	245	0.402151
26	2006	0.720746	80	0.415571	0.750487	247	0.379993
26	2007	0.720746	80	0.402315	0.751487	249	0.382189
26	2008	0.720746	80	0.403629	0.751487	249	0.375693
26	2009	0.720746	80	0.402797	0.751487	249	0.380414
26	2010	0.720746	80	0.405672	0.752199	239	0.391798
27	1992	0.696249	146	0.452067	0.732681	214	0.419038
27	1993	0.700166	163	0.432729	0.724829	241	0.412684
27	1994	0.703774	163	0.441883	0.732359	249	0.392382
27	1995	0.702968	165	0.440985	0.731162	249	0.398695
27	1996	0.703765	163	0.440681	0.734742	225	0.428881
27	1997	0.703372	163	0.440572	0.732548	237	0.406629
27	1998	0.703765	163	0.444538	0.731463	240	0.406062
27	1999	0.703765	163	0.444869	0.734164	235	0.412927
27	2000	0.703765	163	0.447382	0.731274	237	0.419228
27	2001	0.702865	164	0.450622	0.723996	253	0.410383
27	2002	0.702865	164	0.448837	0.73431	255	0.413919
27	2003	0.702219	166	0.454911	0.733971	247	0.428858
27	2004	0.702219	166	0.452798	0.724398	239	0.444205
27	2005	0.702219	166	0.452548	0.729705	239	0.447065
27	2006	0.694275	175	0.437378	0.741111	269	0.409587
27	2007	0.694275	175	0.439073	0.739766	273	0.417561
27	2008	0.694465	174	0.424652	0.741906	267	0.420592
27	2009	0.693905	176	0.434139	0.745801	271	0.432033
27	2010	0.693905	176	0.431631	0.743848	276	0.419758
28	1992	0.736285	114	0.399594	0.740282	122	0.400796
28	1993	0.736285	114	0.399766	0.740065	123	0.405383
28	1994	0.736285	114	0.400498	0.745143	123	0.405647
28	1995	0.736285	114	0.397033	0.747369	125	0.40649
28	1996	0.736285	114	0.392651	0.765472	174	0.347542
28	1997	0.736285	114	0.394807	0.763196	165	0.354513
28	1998	0.736285	114	0.396422	0.761074	173	0.338244
28	1999	0.736285	114	0.398094	0.762798	174	0.35131
28	2000	0.736285	114	0.399432	0.765992	165	0.367171
28	2001	0.736285	114	0.400629	0.765992	165	0.364384
28	2002	0.736285	114	0.402323	0.764747	168	0.362927
28	2003	0.736285	114	0.40312	0.764018	172	0.366093
28	2004	0.736285	114	0.401715	0.766301	169	0.359422
28	2005	0.736285	114	0.400694	0.752982	155	0.375801
28	2006	0.736285	114	0.401146	0.761873	154	0.384563
28	2007	0.736285	114	0.401361	0.763815	167	0.377061
28	2008	0.736285	114	0.40007	0.764637	165	0.36959
28	2009	0.736285	114	0.396239	0.768227	163	0.363599
28	2010	0.736285	114	0.394769	0.767326	165	0.367915
29	1992	0.755583	88	0.353564	0.76018	92	0.381255
29	1993	0.755583	88	0.350864	0.75783	95	0.38396
29	1994	0.755583	88	0.354131	0.75783	95	0.401866
29	1995	0.755583	88	0.353647	0.76018	92	0.385246
29	1996	0.755583	88	0.354187	0.75783	95	0.389165
29	1997	0.755583	88	0.35439	0.760464	91	0.376013
29	1998	0.755583	88	0.352631	0.754207	124	0.306464
29	1999	0.755583	88	0.353927	0.759422	129	0.309015
29	2000	0.755583	88	0.354118	0.763416	128	0.31583
29	2001	0.755583	88	0.356687	0.762194	136	0.305467
29	2002	0.755583	88	0.356784	0.758123	135	0.33537
29	2003	0.755583	88	0.353957	0.753871	125	0.333971
29	2004	0.755583	88	0.351458	0.762136	140	0.315336
29	2005	0.755583	88	0.344757	0.75032	126	0.341166
29	2006	0.755583	88	0.343973	0.759208	144	0.320908
29	2007	0.755583	88	0.344555	0.76606	156	0.29682
29	2008	0.755583	88	0.341156	0.746038	146	0.283699
29	2009	0.755583	88	0.344869	0.754361	164	0.285804
29	2010	0.755583	88	0.343589	0.74763	172	0.287852
32	1992	0.743324	175	0.357646	0.751545	216	0.345194
32	1993	0.743324	175	0.358977	0.739897	216	0.353149
32	1994	0.743324	175	0.364658	0.747517	228	0.341036
32	1995	0.743324	175	0.366066	0.752002	227	0.339194
32	1996	0.743324	175	0.365784	0.752768	225	0.346288
32	1997	0.743324	175	0.366113	0.752516	226	0.335895
32	1998	0.743324	175	0.368254	0.753502	227	0.349286
32	1999	0.743324	175	0.366998	0.752161	230	0.355595
32	2000	0.743324	175	0.366755	0.752754	229	0.352509
32	2001	0.743324	175	0.367214	0.752904	231	0.351084
32	2002	0.743324	175	0.36716	0.76411	235	0.343065
32	2003	0.743324	175	0.367595	0.751056	229	0.356509
32	2004	0.743324	175	0.368306	0.753185	215	0.374737
32	2005	0.743324	175	0.366316	0.765003	228	0.354089
32	2006	0.743324	175	0.368012	0.754152	226	0.358005
32	2007	0.743324	175	0.368615	0.759312	230	0.353155
32	2008	0.743324	175	0.370888	0.76323	240	0.347757
32	2009	0.743324	175	0.372085	0.755885	226	0.368332
32	2010	0.743324	175	0.371112	0.753414	233	0.355958
33	1992	0.705831	92	0.532976	0.740713	273	0.437774
33	1993	0.70977	100	0.524198	0.740713	273	0.442884
33	1994	0.70977	100	0.527417	0.740713	273	0.44237
33	1995	0.70977	100	0.529074	0.740713	273	0.443297
33	1996	0.708721	101	0.531539	0.740713	273	0.446626
33	1997	0.708721	101	0.531402	0.740713	273	0.445572
33	1998	0.708721	101	0.530814	0.740364	274	0.445667
33	1999	0.708721	101	0.532738	0.740364	274	0.448526
33	2000	0.705777	106	0.522303	0.740751	273	0.447445
33	2001	0.702966	111	0.50755	0.740751	273	0.446843
33	2002	0.702394	123	0.469984	0.741103	272	0.450142
33	2003	0.702394	123	0.467202	0.741103	272	0.450497
33	2004	0.702394	123	0.466618	0.741103	272	0.449678
33	2005	0.702394	123	0.468112	0.741103	272	0.449091
33	2006	0.702394	123	0.469184	0.741103	272	0.450263
33	2007	0.702394	123	0.466772	0.741189	266	0.449698
33	2008	0.707305	122	0.46089	0.741189	266	0.452954
33	2009	0.707305	122	0.463513	0.741189	266	0.453564
33	2010	0.707305	122	0.463604	0.741189	266	0.455064
35	1992	0.648289	83	0.356898	0.727061	160	0.374154
35	1993	0.648289	83	0.364435	0.727061	160	0.375333
35	1994	0.648289	83	0.373218	0.71936	179	0.359753
35	1995	0.648289	83	0.371004	0.723799	177	0.368778
35	1996	0.648289	83	0.387516	0.722201	179	0.376824
35	1997	0.648289	83	0.389955	0.725868	178	0.379886
35	1998	0.648289	83	0.391275	0.727617	209	0.357527
35	1999	0.648289	83	0.382283	0.726316	206	0.370917
35	2000	0.648289	83	0.381625	0.723719	206	0.375421
35	2001	0.648289	83	0.384296	0.723167	207	0.371354
35	2002	0.648289	83	0.389861	0.722818	202	0.374173
35	2003	0.648289	83	0.387011	0.728899	206	0.366214
35	2004	0.648289	83	0.387893	0.720945	213	0.351509
35	2005	0.648289	83	0.387086	0.724452	204	0.387244
35	2006	0.648289	83	0.38635	0.729918	209	0.387244
35	2007	0.648289	83	0.385492	0.730033	209	0.380175
35	2008	0.648289	83	0.38268	0.731987	209	0.392888
35	2009	0.648289	83	0.381004	0.725855	223	0.382561
35	2010	0.648289	83	0.383951	0.721252	222	0.389219
36	1992	0.744315	49	0.421733	0.761012	98	0.399291
36	1993	0.744315	49	0.435922	0.761012	98	0.392326
36	1994	0.744315	49	0.434879	0.761012	98	0.402822
36	1995	0.744315	49	0.430897	0.761012	98	0.405027
36	1996	0.744315	49	0.420657	0.761012	98	0.397552
36	1997	0.744315	49	0.411144	0.761012	98	0.385974
36	1998	0.744315	49	0.426738	0.761012	98	0.402002
36	1999	0.744315	49	0.425028	0.761012	98	0.386367
36	2000	0.744315	49	0.444699	0.761012	98	0.389967
36	2001	0.744315	49	0.450656	0.761012	98	0.395054
36	2002	0.744315	49	0.450834	0.753766	109	0.336423
36	2003	0.744315	49	0.453481	0.756214	107	0.337823
36	2004	0.744315	49	0.459629	0.741968	115	0.292865
36	2005	0.744315	49	0.468408	0.745107	107	0.298201
36	2006	0.744315	49	0.450826	0.75248	110	0.341208
36	2007	0.744315	49	0.442719	0.747461	109	0.285831
36	2008	0.744315	49	0.460995	0.741456	115	0.283116
36	2009	0.744315	49	0.450481	0.741456	115	0.287869
36	2010	0.744315	49	0.441529	0.741456	115	0.301041
37	1992	0.734026	116	0.335059	0.748493	168	0.334133
37	1993	0.734026	116	0.336974	0.745903	172	0.325637
37	1994	0.734026	116	0.335842	0.741311	166	0.33147
37	1995	0.734026	116	0.334884	0.748322	159	0.328929
37	1996	0.734026	116	0.339574	0.732777	163	0.322057
37	1997	0.734026	116	0.337548	0.738088	152	0.337939
37	1998	0.734026	116	0.340535	0.731185	158	0.334934
37	1999	0.734026	116	0.342587	0.739769	167	0.31234
37	2000	0.734026	116	0.344125	0.741872	152	0.340417
37	2001	0.734026	116	0.344218	0.733886	162	0.332186
37	2002	0.734026	116	0.34777	0.740451	153	0.372877
37	2003	0.734026	116	0.356096	0.742112	163	0.349659
37	2004	0.734026	116	0.355067	0.736444	150	0.375864
37	2005	0.734026	116	0.355002	0.740207	155	0.361947
37	2006	0.734026	116	0.352305	0.740377	165	0.339862
37	2007	0.734026	116	0.355328	0.738392	168	0.334925
37	2008	0.734026	116	0.359423	0.754847	173	0.338033
37	2009	0.734026	116	0.357494	0.741013	154	0.369395
37	2010	0.734026	116	0.360997	0.74413	168	0.368106
38	1992	0.749768	117	0.450201	0.738981	215	0.402609
38	1993	0.749768	117	0.449777	0.733999	227	0.373923
38	1994	0.749768	117	0.447836	0.748949	222	0.3838
38	1995	0.749768	117	0.447885	0.743818	239	0.376187
38	1996	0.749768	117	0.447606	0.75412	233	0.393941
38	1997	0.749768	117	0.446273	0.742299	219	0.407181
38	1998	0.749768	117	0.446389	0.744189	234	0.392416
38	1999	0.749768	117	0.445902	0.746094	234	0.392436
38	2000	0.749768	117	0.444506	0.747453	226	0.400508
38	2001	0.749768	117	0.44345	0.74628	231	0.394125
38	2002	0.749768	117	0.446359	0.742364	225	0.408622
38	2003	0.749768	117	0.444799	0.747533	234	0.382711
38	2004	0.749768	117	0.44224	0.733392	221	0.413156
38	2005	0.749768	117	0.443976	0.739991	217	0.40113
38	2006	0.749768	117	0.441811	0.736978	223	0.39302
38	2007	0.749768	117	0.441864	0.742104	232	0.377407
38	2008	0.749768	117	0.442054	0.747855	227	0.389847
38	2009	0.749768	117	0.442745	0.746481	230	0.389739
38	2010	0.749768	117	0.444288	0.747734	237	0.375407
39	1992	0.740905	96	0.330451	0.742863	100	0.395712
39	1993	0.740905	96	0.331967	0.742417	101	0.397734
39	1994	0.740905	96	0.330279	0.749954	154	0.321903
39	1995	0.740905	96	0.327926	0.738687	152	0.331841
39	1996	0.740905	96	0.325697	0.74097	154	0.299951
39	1997	0.740905	96	0.324751	0.736392	146	0.298181
39	1998	0.740905	96	0.332939	0.736392	146	0.317744
39	1999	0.740905	96	0.328905	0.739987	150	0.299091
39	2000	0.740905	96	0.330207	0.741354	142	0.342893
39	2001	0.740905	96	0.330846	0.758246	132	0.313296
39	2002	0.740905	96	0.330748	0.749382	134	0.312897
39	2003	0.740905	96	0.334666	0.757275	133	0.365028
39	2004	0.73543	93	0.324684	0.742592	126	0.367347
39	2005	0.740905	96	0.331842	0.745481	126	0.377755
39	2006	0.740905	96	0.336071	0.751258	128	0.385182
39	2007	0.740905	96	0.341006	0.750169	130	0.387409
39	2008	0.740905	96	0.339854	0.756021	131	0.358881
39	2009	0.740905	96	0.345374	0.756021	131	0.362617
39	2010	0.740905	96	0.344523	0.757445	144	0.330171
40	1992	0.697604	121	0.498953	0.744412	209	0.421404
40	1993	0.697604	121	0.499057	0.744346	209	0.424093
40	1994	0.697604	121	0.498411	0.744519	211	0.426907
40	1995	0.697604	121	0.499494	0.740696	225	0.406038
40	1996	0.697604	121	0.499097	0.740177	228	0.3983
40	1997	0.697604	121	0.500951	0.737143	241	0.380515
40	1998	0.696424	129	0.468264	0.738782	242	0.3775
40	1999	0.696424	129	0.47229	0.74684	237	0.382194
40	2000	0.696424	129	0.472417	0.745538	240	0.386418
40	2001	0.696424	129	0.471734	0.741787	229	0.396662
40	2002	0.696424	129	0.469865	0.741285	256	0.366194
40	2003	0.696424	129	0.469848	0.742668	252	0.374643
40	2004	0.699504	130	0.473925	0.746499	256	0.372549
40	2005	0.699504	130	0.474783	0.748577	246	0.390011
40	2006	0.699504	130	0.474652	0.743065	240	0.395941
40	2007	0.699504	130	0.476308	0.743729	252	0.382107
40	2008	0.699504	130	0.476201	0.744774	250	0.391977
40	2009	0.699504	130	0.476084	0.74238	241	0.39749
40	2010	0.699504	130	0.476781	0.742752	255	0.385677
44	1992	0.749709	145	0.392399	0.758302	264	0.341633
44	1993	0.749709	145	0.393725	0.754864	252	0.351929
44	1994	0.750597	144	0.38916	0.753313	255	0.34654
44	1995	0.751674	143	0.389007	0.753477	262	0.342055
44	1996	0.751674	143	0.383255	0.751324	256	0.360019
44	1997	0.750589	144	0.395334	0.74994	259	0.363146
44	1998	0.750589	144	0.394557	0.746844	262	0.3579
44	1999	0.747295	175	0.403719	0.746527	258	0.367367
44	2000	0.747295	175	0.405772	0.747654	262	0.37129
44	2001	0.747295	175	0.406146	0.750872	263	0.36722
44	2002	0.747295	175	0.406141	0.753488	268	0.359952
44	2003	0.747295	175	0.40783	0.753907	262	0.372507
44	2004	0.747295	175	0.405773	0.75216	257	0.378119
44	2005	0.747295	175	0.40603	0.75035	257	0.38709
44	2006	0.747295	175	0.406396	0.761126	266	0.372846
44	2007	0.747295	175	0.406068	0.754965	258	0.37795
44	2008	0.747295	175	0.406367	0.74969	262	0.373251
44	2009	0.747295	175	0.407516	0.7629	264	0.368367
44	2010	0.747295	175	0.411498	0.751242	258	0.384126
45	1992	0.736248	89	0.308174	0.750418	104	0.378681
45	1993	0.736248	89	0.308344	0.743616	102	0.36986
45	1994	0.736248	89	0.308367	0.743938	101	0.366625
45	1995	0.745671	91	0.311226	0.763781	134	0.344093
45	1996	0.745671	91	0.311716	0.756115	147	0.332716
45	1997	0.745671	91	0.309431	0.755546	135	0.332534
45	1998	0.745671	91	0.311574	0.770137	161	0.290755
45	1999	0.745671	91	0.311004	0.751219	153	0.301727
45	2000	0.745671	91	0.311419	0.756356	135	0.334845
45	2001	0.745671	91	0.311568	0.75252	145	0.327195
45	2002	0.745671	91	0.306473	0.759806	148	0.3377
45	2003	0.745671	91	0.308728	0.768509	151	0.326573
45	2004	0.745671	91	0.305458	0.781761	148	0.329023
45	2005	0.745671	91	0.306908	0.762466	136	0.350421
45	2006	0.745671	91	0.308067	0.763073	141	0.342443
45	2007	0.745671	91	0.311154	0.762792	136	0.35585
45	2008	0.745671	91	0.307671	0.757815	134	0.342248
45	2009	0.745671	91	0.308557	0.758308	133	0.351252
45	2010	0.745671	91	0.308099	0.765533	126	0.370227
46	1992	0.752394	94	0.342751	0.746398	172	0.331862
46	1993	0.756177	98	0.344018	0.754618	162	0.367343
46	1994	0.756177	98	0.343835	0.755342	176	0.323084
46	1995	0.754227	101	0.351648	0.770955	156	0.359245
46	1996	0.741875	115	0.394611	0.737024	147	0.413391
46	1997	0.741875	115	0.394098	0.74534	152	0.400426
46	1998	0.741875	115	0.394116	0.74534	152	0.403957
46	1999	0.741875	115	0.395053	0.74563	145	0.423173
46	2000	0.741875	115	0.395429	0.74654	144	0.429873
46	2001	0.756173	122	0.389012	0.751828	154	0.409757
46	2002	0.756173	122	0.389873	0.75032	184	0.37759
46	2003	0.756173	122	0.39156	0.751613	176	0.391017
46	2004	0.756173	122	0.391314	0.749759	192	0.352343
46	2005	0.756173	122	0.390468	0.760741	197	0.381092
46	2006	0.756173	122	0.387559	0.7683	212	0.347083
46	2007	0.756173	122	0.385329	0.763923	223	0.324562
46	2008	0.756173	122	0.385812	0.770682	219	0.333872
46	2009	0.756173	122	0.387328	0.770188	218	0.33805
46	2010	0.756173	122	0.386594	0.767964	223	0.339612
47	1992	0.703024	71	0.344392	0.742963	146	0.358267
47	1993	0.703024	71	0.330091	0.742963	146	0.350909
47	1994	0.703024	71	0.330348	0.743106	146	0.35722
47	1995	0.703024	71	0.330627	0.743106	146	0.35467
47	1996	0.707285	69	0.311029	0.744982	144	0.348101
47	1997	0.707285	69	0.313453	0.740521	156	0.333852
47	1998	0.707285	69	0.316729	0.746575	133	0.381555
47	1999	0.691834	67	0.313237	0.731086	157	0.337557
47	2000	0.691834	67	0.314381	0.731086	157	0.336698
47	2001	0.691834	67	0.32127	0.734587	140	0.38294
47	2002	0.691834	67	0.326588	0.721536	154	0.342168
47	2003	0.691834	67	0.320415	0.711813	166	0.320399
47	2004	0.696665	64	0.324838	0.72032	168	0.318837
47	2005	0.696665	64	0.324096	0.716752	173	0.32674
47	2006	0.696665	64	0.317492	0.711263	172	0.322831
47	2007	0.696665	64	0.333768	0.715607	155	0.346417
47	2008	0.696665	64	0.339528	0.715607	155	0.345332
47	2009	0.696665	64	0.33772	0.715607	155	0.3437
47	2010	0.696665	64	0.336899	0.741693	161	0.344253
48	1992	0.741285	123	0.371902	0.769541	198	0.351639
48	1993	0.742733	122	0.370912	0.764897	194	0.352922
48	1994	0.742733	122	0.368488	0.755888	218	0.374957
48	1995	0.742733	122	0.368638	0.752697	230	0.356241
48	1996	0.742733	122	0.368285	0.758663	217	0.350894
48	1997	0.742733	122	0.363879	0.75026	237	0.35413
48	1998	0.746412	123	0.367694	0.751667	232	0.370361
48	1999	0.746412	123	0.370661	0.75274	234	0.366526
48	2000	0.746412	123	0.369004	0.74991	240	0.374275
48	2001	0.746412	123	0.366836	0.751701	236	0.374212
48	2002	0.746412	123	0.368377	0.752656	234	0.381742
48	2003	0.746412	123	0.371159	0.753651	232	0.392369
48	2004	0.746412	123	0.368519	0.754575	230	0.40214
48	2005	0.746412	123	0.366147	0.753053	235	0.383776
48	2006	0.746412	123	0.368222	0.752543	236	0.383118
48	2007	0.746412	123	0.367254	0.764869	244	0.376397
48	2008	0.746412	123	0.36468	0.766285	248	0.373214
48	2009	0.746412	123	0.364082	0.767549	235	0.382115
48	2010	0.746412	123	0.365775	0.756214	228	0.39248
49	1992	0.737299	130	0.412399	0.759364	172	0.44081
49	1993	0.737299	130	0.412118	0.758427	176	0.443145
49	1994	0.737299	130	0.411625	0.761128	172	0.442123
49	1995	0.737299	130	0.411896	0.76129	172	0.44075
49	1996	0.737299	130	0.409983	0.761128	172	0.436459
49	1997	0.737299	130	0.407809	0.760729	173	0.436723
49	1998	0.737299	130	0.412356	0.758427	176	0.441272
49	1999	0.73694	131	0.41561	0.757091	243	0.388906
49	2000	0.73694	131	0.417141	0.755448	246	0.389485
49	2001	0.73694	131	0.417635	0.764366	255	0.38194
49	2002	0.73694	131	0.419105	0.766308	258	0.371691
49	2003	0.73694	131	0.41861	0.758747	242	0.398556
49	2004	0.73694	131	0.419357	0.765007	253	0.383798
49	2005	0.73694	131	0.419788	0.763359	243	0.389325
49	2006	0.73694	131	0.418907	0.752171	211	0.404772
49	2007	0.73694	131	0.421222	0.761966	234	0.401709
49	2008	0.73694	131	0.419433	0.772581	226	0.38379
49	2009	0.73694	131	0.419649	0.76604	217	0.394082
49	2010	0.73694	131	0.42079	0.766615	223	0.399185
50	1992	0.664477	144	0.465326	0.729594	232	0.420065
50	1993	0.664477	144	0.464534	0.73251	230	0.418646
50	1994	0.664477	144	0.470067	0.72701	233	0.414782
50	1995	0.664477	144	0.46626	0.727195	239	0.408322
50	1996	0.664477	144	0.462511	0.731247	229	0.420686
50	1997	0.664477	144	0.465594	0.722699	232	0.412942
50	1998	0.664477	144	0.462348	0.728232	235	0.413105
50	1999	0.664477	144	0.460712	0.728436	237	0.423023
50	2000	0.664477	144	0.460463	0.7272	238	0.418122
50	2001	0.664477	144	0.460262	0.732512	249	0.407342
50	2002	0.664477	144	0.458108	0.728345	237	0.424422
50	2003	0.664477	144	0.455407	0.726866	236	0.418543
50	2004	0.664477	144	0.455779	0.74343	258	0.404542
50	2005	0.664477	144	0.45724	0.726513	243	0.416712
50	2006	0.664477	144	0.459887	0.731081	250	0.40964
50	2007	0.664477	144	0.462184	0.736241	253	0.410571
50	2008	0.664477	144	0.463406	0.735008	256	0.416389
50	2009	0.664477	144	0.464719	0.73454	260	0.408246
50	2010	0.664477	144	0.460103	0.736178	256	0.408989
51	1992	0.687955	137	0.43829	0.716682	182	0.463875
52	1992	0.664888	120	0.41182	0.673129	124	0.43964
52	1993	0.664888	120	0.420216	0.677796	126	0.465731
52	1994	0.664888	120	0.421356	0.705372	166	0.451521
52	1995	0.664888	120	0.421026	0.717284	152	0.433333
52	1996	0.693188	128	0.399975	0.719664	145	0.438181
52	1997	0.693188	128	0.408245	0.718424	146	0.441988
52	1998	0.684551	142	0.425421	0.714606	162	0.453399
52	1999	0.656371	135	0.44912	0.720143	186	0.461741
52	2000	0.658523	147	0.419764	0.711958	184	0.429188
52	2001	0.658523	147	0.418592	0.699035	195	0.426377
52	2002	0.659722	146	0.419158	0.727382	212	0.407168
52	2003	0.659393	147	0.420705	0.721324	211	0.394206
52	2004	0.68118	155	0.40785	0.722391	205	0.414967
52	2005	0.680817	156	0.405121	0.713062	203	0.423578
52	2006	0.683547	157	0.411696	0.7107	225	0.395414
52	2007	0.680817	156	0.412271	0.722907	224	0.412291
52	2008	0.683059	159	0.421926	0.733991	229	0.405575
52	2009	0.683059	159	0.419267	0.730069	218	0.434854
52	2010	0.683059	159	0.418525	0.728207	241	0.404327
53	1992	0.751701	119	0.355454	0.752118	169	0.371799
53	1993	0.751701	119	0.352455	0.752355	161	0.365878
53	1994	0.751701	119	0.354657	0.748678	168	0.353968
53	1995	0.750811	120	0.354035	0.753092	164	0.351146
53	1996	0.750811	120	0.352572	0.752656	161	0.367089
53	1997	0.746066	132	0.331397	0.748811	173	0.35888
53	1998	0.745308	133	0.333095	0.739816	177	0.344048
53	1999	0.745308	133	0.332741	0.754407	170	0.38115
53	2000	0.745308	133	0.330731	0.747886	165	0.362339
53	2001	0.745308	133	0.327839	0.740569	183	0.337843
53	2002	0.745308	133	0.327234	0.740415	183	0.343875
53	2003	0.745308	133	0.326732	0.743555	186	0.348978
53	2004	0.745308	133	0.326985	0.758076	218	0.315396
53	2005	0.745308	133	0.328644	0.760452	198	0.338668
53	2006	0.745308	133	0.326309	0.75976	199	0.342195
53	2007	0.745308	133	0.328161	0.764667	198	0.358542
53	2008	0.745308	133	0.32906	0.763755	218	0.321687
53	2009	0.745308	133	0.325877	0.761719	222	0.327991
53	2010	0.747418	130	0.33005	0.746746	202	0.34945
54	1992	0.634436	74	0.366716	0.742087	278	0.392428
54	1993	0.63291	76	0.359449	0.732821	271	0.397662
54	1994	0.63291	76	0.363169	0.732535	271	0.405606
54	1995	0.63291	76	0.371781	0.734303	272	0.407703
54	1996	0.629463	75	0.364872	0.734244	272	0.413392
54	1997	0.636825	76	0.368775	0.73418	266	0.419145
54	1998	0.636825	76	0.369273	0.73354	268	0.414042
54	1999	0.636825	76	0.366719	0.732684	265	0.421489
54	2000	0.653285	78	0.376004	0.734491	266	0.429035
54	2001	0.653285	78	0.376477	0.743707	278	0.417037
54	2002	0.653285	78	0.379649	0.732815	271	0.432211
54	2003	0.653703	79	0.386663	0.732611	272	0.448149
54	2004	0.658757	86	0.381476	0.733031	271	0.441474
54	2005	0.658448	85	0.380982	0.734078	273	0.432155
54	2006	0.658757	86	0.386275	0.734078	273	0.432511
54	2007	0.658757	86	0.38538	0.744265	277	0.42094
54	2008	0.658757	86	0.385659	0.742628	276	0.423696
54	2009	0.658757	86	0.387428	0.742628	276	0.430164
54	2010	0.659399	89	0.395534	0.743908	276	0.428082
55	1992	0.746099	122	0.357189	0.761545	149	0.407039
55	1993	0.746099	122	0.356924	0.759143	145	0.420754
55	1994	0.746099	122	0.356067	0.756097	153	0.407028
55	1995	0.742714	130	0.339047	0.760584	175	0.38121
55	1996	0.742714	130	0.340413	0.753178	185	0.355868
55	1997	0.742714	130	0.338479	0.753493	180	0.372016
55	1998	0.742714	130	0.34124	0.753493	180	0.376387
55	1999	0.742714	130	0.345342	0.753493	180	0.376929
55	2000	0.742714	130	0.343214	0.75606	175	0.413604
55	2001	0.742714	130	0.343636	0.753292	176	0.406249
55	2002	0.742714	130	0.344389	0.754394	177	0.41808
55	2003	0.742714	130	0.345825	0.757278	174	0.41767
55	2004	0.742714	130	0.345118	0.75238	176	0.412637
55	2005	0.742714	130	0.347644	0.747182	190	0.394262
55	2006	0.742714	130	0.344405	0.752105	177	0.413854
55	2007	0.742714	130	0.344739	0.75113	178	0.419739
55	2008	0.742714	130	0.346038	0.752347	177	0.415172
55	2009	0.742714	130	0.347814	0.755648	176	0.427029
55	2010	0.742714	130	0.342365	0.76026	169	0.426903
56	1992	0.735671	135	0.410094	0.756245	171	0.442649
56	1993	0.735671	135	0.40936	0.754398	174	0.439829
56	1994	0.735671	135	0.409316	0.752763	180	0.42663
56	1995	0.738842	131	0.408257	0.755779	172	0.445744
56	1996	0.738842	131	0.411092	0.755779	172	0.451511
56	1997	0.738842	131	0.407985	0.753264	179	0.425247
56	1998	0.738842	131	0.408517	0.756765	170	0.445793
56	1999	0.738842	131	0.410184	0.756765	170	0.44447
56	2000	0.738842	131	0.408261	0.756765	170	0.445217
56	2001	0.738842	131	0.408817	0.756765	170	0.446116
56	2002	0.738842	131	0.40979	0.745808	197	0.405642
56	2003	0.738842	131	0.410354	0.743412	205	0.39209
56	2004	0.738842	131	0.409081	0.742332	207	0.387519
56	2005	0.738842	131	0.409002	0.750031	197	0.41594
56	2006	0.738842	131	0.407446	0.75882	217	0.381315
56	2007	0.738842	131	0.407384	0.755517	215	0.38502
56	2008	0.738842	131	0.40629	0.755517	215	0.385153
56	2009	0.737625	132	0.407048	0.75882	217	0.384539
56	2010	0.737625	132	0.40484	0.75882	217	0.384504
57	1992	0.677001	68	0.464248	0.685141	116	0.447002
57	1993	0.677001	68	0.465624	0.694958	124	0.426453
57	1994	0.677001	68	0.462586	0.708432	119	0.465101
57	1995	0.687434	72	0.456299	0.713516	123	0.472656
57	1996	0.687434	72	0.462578	0.713516	123	0.473976
57	1997	0.687434	72	0.468712	0.713516	123	0.478392
57	1998	0.687434	72	0.467646	0.730784	224	0.377598
57	1999	0.687434	72	0.468518	0.734166	225	0.370888
57	2000	0.687434	72	0.471595	0.733396	219	0.375101
57	2001	0.687434	72	0.470729	0.731071	244	0.354987
57	2002	0.687434	72	0.47089	0.731039	233	0.365605
57	2003	0.686338	78	0.483135	0.729269	230	0.373748
57	2004	0.686338	78	0.481142	0.732514	246	0.380125
57	2005	0.686338	78	0.4826	0.732448	241	0.371293
57	2006	0.686463	79	0.490387	0.731421	243	0.378711
57	2007	0.686463	79	0.488608	0.732825	244	0.372824
57	2008	0.686463	79	0.489827	0.739317	241	0.370008
57	2009	0.686463	79	0.490661	0.748057	250	0.365023
57	2010	0.686463	79	0.493222	0.737215	240	0.388961
58	1992	0.727977	180	0.424403	0.736856	222	0.394085
58	1993	0.72736	181	0.430079	0.734069	237	0.378311
58	1994	0.72736	181	0.429226	0.733069	235	0.382422
58	1995	0.726783	182	0.427291	0.730313	243	0.37837
58	1996	0.726783	182	0.433548	0.740509	256	0.366602
58	1997	0.726783	182	0.425396	0.731926	247	0.370014
58	1998	0.726783	182	0.428666	0.736295	243	0.38064
58	1999	0.731912	184	0.4379	0.74292	246	0.38255
58	2000	0.731912	184	0.436996	0.741731	255	0.373965
58	2001	0.731912	184	0.436273	0.74308	241	0.394952
58	2002	0.731912	184	0.438072	0.744964	250	0.391352
58	2003	0.731912	184	0.437764	0.746861	241	0.394691
58	2004	0.731912	184	0.437061	0.74036	253	0.384899
58	2005	0.731912	184	0.439977	0.76287	233	0.407513
58	2006	0.731912	184	0.437719	0.754637	254	0.379915
58	2007	0.731912	184	0.438279	0.741253	251	0.382078
58	2008	0.731912	184	0.43851	0.74635	266	0.369614
58	2009	0.731912	184	0.43858	0.744689	255	0.381641
58	2010	0.731912	184	0.440565	0.754144	251	0.386528
59	1992	0.670258	173	0.437733	0.721716	235	0.412087
59	1993	0.670258	173	0.43815	0.711968	231	0.412747
59	1994	0.670258	173	0.440172	0.711867	243	0.417361
59	1995	0.670258	173	0.440568	0.708268	239	0.415018
59	1996	0.670258	173	0.439513	0.712521	229	0.432674
59	1997	0.670258	173	0.437549	0.707461	242	0.407798
59	1998	0.670258	173	0.437754	0.71797	245	0.408063
59	1999	0.670258	173	0.438062	0.724325	251	0.405685
59	2000	0.670004	174	0.441348	0.726594	250	0.404376
59	2001	0.670004	174	0.441409	0.713332	245	0.415325
59	2002	0.670004	174	0.443106	0.717712	246	0.423522
59	2003	0.670004	174	0.442163	0.740463	260	0.397924
59	2004	0.670004	174	0.44109	0.722819	250	0.416013
59	2005	0.670004	174	0.44229	0.719278	249	0.416954
59	2006	0.670004	174	0.443029	0.727094	257	0.41332
59	2007	0.670004	174	0.443372	0.73402	247	0.420223
59	2008	0.670004	174	0.444937	0.731283	260	0.411766
59	2009	0.670004	174	0.445225	0.736324	261	0.414709
59	2010	0.670004	174	0.446156	0.734927	259	0.41633
60	1992	0.703391	114	0.401072	0.740656	185	0.397313
60	1993	0.703391	114	0.401023	0.730501	212	0.381384
60	1994	0.708112	115	0.41134	0.746106	223	0.375833
60	1995	0.711337	103	0.440056	0.721729	217	0.395883
60	1996	0.711337	103	0.453511	0.723961	225	0.380968
60	1997	0.717057	99	0.453738	0.731911	218	0.399503
60	1998	0.711337	103	0.446727	0.725497	227	0.382341
60	1999	0.706674	108	0.441815	0.736624	227	0.397574
60	2000	0.706674	108	0.441646	0.743901	244	0.409045
60	2001	0.706674	108	0.44746	0.733366	251	0.408115
60	2002	0.706674	108	0.449106	0.740828	260	0.407474
60	2003	0.706674	108	0.451463	0.743866	256	0.402198
60	2004	0.706674	108	0.442814	0.740521	261	0.383762
60	2005	0.706674	108	0.416458	0.752357	265	0.37109
60	2006	0.704011	110	0.423537	0.75265	264	0.382732
60	2007	0.704011	110	0.421655	0.750027	256	0.395727
60	2008	0.704011	110	0.422271	0.747113	254	0.39322
60	2009	0.704011	110	0.416987	0.748703	264	0.38768
60	2010	0.704011	110	0.418114	0.748706	264	0.385928
61	1992	0.78739	22	0.480634	0.70804	48	0.393091
61	1993	0.78739	22	0.477875	0.70804	48	0.388226
61	1994	0.78739	22	0.481855	0.777893	32	0.56141
61	1995	0.78739	22	0.48327	0.78048	33	0.578712
61	1996	0.78739	22	0.484413	0.777893	32	0.57031
61	1997	0.78739	22	0.483885	0.78048	33	0.584315
61	1998	0.78739	22	0.483431	0.777893	32	0.580199
61	1999	0.78739	22	0.48198	0.78048	33	0.583395
61	2000	0.78739	22	0.483915	0.777893	32	0.587512
61	2001	0.78739	22	0.483988	0.777893	32	0.58846
61	2002	0.78739	22	0.482562	0.751201	58	0.388953
61	2003	0.78739	22	0.481832	0.751201	58	0.39722
61	2004	0.78739	22	0.480855	0.751201	58	0.394622
61	2005	0.78739	22	0.481386	0.713491	75	0.323557
61	2006	0.78739	22	0.4811	0.713942	74	0.317558
61	2007	0.78739	22	0.48164	0.713942	74	0.314642
61	2008	0.78739	22	0.48033	0.713942	74	0.314033
61	2009	0.78739	22	0.481218	0.713942	74	0.319368
61	2010	0.78739	22	0.479776	0.751201	58	0.409969
62	1992	0.765064	185	0.393522	0.770731	213	0.399704
63	1992	0.669314	64	0.464172	0.709013	183	0.367293
63	1993	0.669314	64	0.466261	0.72573	210	0.357833
63	1994	0.669314	64	0.465425	0.724461	225	0.355284
63	1995	0.669314	64	0.464944	0.744392	233	0.349582
63	1996	0.669314	64	0.462204	0.734613	228	0.385575
63	1997	0.669314	64	0.472215	0.728651	231	0.384662
63	1998	0.669314	64	0.454743	0.741476	239	0.37942
63	1999	0.669314	64	0.448254	0.742458	241	0.371007
63	2000	0.669314	64	0.457196	0.729458	230	0.382679
63	2001	0.675909	65	0.469059	0.731155	231	0.381915
63	2002	0.675909	65	0.458621	0.730896	231	0.376012
63	2003	0.679347	63	0.445696	0.730254	233	0.381608
63	2004	0.692089	74	0.421319	0.731819	238	0.40139
63	2005	0.692089	74	0.412441	0.733843	237	0.404238
63	2006	0.692089	74	0.403595	0.743602	252	0.392305
63	2007	0.692089	74	0.401653	0.744619	249	0.403274
63	2008	0.674457	81	0.377662	0.742568	249	0.406492
63	2009	0.674457	81	0.374987	0.74446	246	0.413319
63	2010	0.674457	81	0.387084	0.743462	253	0.410396
64	1992	0	1	0	0.730224	205	0.311176
64	1993	0	1	0	0.727208	194	0.305369
64	1994	0	1	0	0.727132	200	0.30021
64	1995	0	1	0	0.730079	177	0.336604
64	1996	0	1	0	0.732318	206	0.304196
64	1997	0	1	0	0.724086	195	0.313056
64	1998	0	1	0	0.729826	201	0.304498
64	1999	0	1	0	0.72557	193	0.315194
64	2000	0	1	0	0.725071	194	0.317473
64	2001	0	1	0	0.723091	200	0.299526
64	2002	0	1	0	0.722105	204	0.310653
64	2003	0	1	0	0.719808	197	0.324433
64	2004	0	1	0	0.724119	200	0.329917
64	2005	0	1	0	0.712835	182	0.346307
64	2006	0	1	0	0.713416	175	0.34786
64	2007	0	1	0	0.719646	181	0.355698
64	2008	0	1	0	0.719646	181	0.36241
64	2009	0	1	0	0.724413	187	0.361041
64	2010	0	1	0	0.74514	157	0.40589
65	2003	0	0	0	1	3	1
65	2004	0	0	0	1	3	1
65	2005	0	0	0	1	3	1
65	2006	0	0	0	1	3	1
65	2007	0	0	0	1	3	1
66	1992	0.728534	117	0.299214	0.739286	214	0.341622
66	1993	0.721878	124	0.317585	0.748295	238	0.349422
66	1994	0.721878	124	0.326274	0.751669	225	0.36431
66	1995	0.721878	124	0.323068	0.741353	212	0.372488
66	1996	0.721878	124	0.317793	0.74383	212	0.369943
66	1997	0.721878	124	0.322796	0.744572	211	0.369427
66	1998	0.721878	124	0.330697	0.74404	211	0.368413
66	1999	0.721878	124	0.321225	0.746926	215	0.365498
66	2000	0.721878	124	0.323649	0.735054	221	0.378152
66	2001	0.721878	124	0.32116	0.735916	228	0.371313
66	2002	0.721878	124	0.321872	0.727715	233	0.365133
66	2003	0.721878	124	0.330025	0.736058	243	0.379671
66	2004	0.72592	110	0.351471	0.744892	229	0.394372
66	2005	0.72592	110	0.351274	0.743677	229	0.395718
66	2006	0.72592	110	0.353635	0.740924	230	0.402079
66	2007	0.72592	110	0.351508	0.737589	227	0.401348
66	2008	0.72592	110	0.354522	0.736692	230	0.394737
66	2009	0.72592	110	0.353375	0.751755	226	0.393621
66	2010	0.72592	110	0.357334	0.740353	227	0.402708
67	1992	0.686747	59	0.420867	0.730936	234	0.3933
67	1993	0.686586	60	0.42132	0.73106	234	0.395975
67	1994	0.683019	67	0.41141	0.731017	241	0.395175
67	1995	0.678029	72	0.400185	0.73412	238	0.404928
67	1996	0.688687	76	0.399064	0.730819	247	0.401445
67	1997	0.688687	76	0.395514	0.734442	259	0.390637
67	1998	0.688687	76	0.39652	0.732529	265	0.384973
67	1999	0.688687	76	0.397507	0.74203	272	0.374254
67	2000	0.688687	76	0.401062	0.731729	267	0.388878
67	2001	0.688687	76	0.400945	0.729828	266	0.389533
67	2002	0.688687	76	0.399605	0.728617	263	0.401177
67	2003	0.688687	76	0.403043	0.730867	269	0.393701
67	2004	0.688687	76	0.402475	0.727762	266	0.391532
67	2005	0.695051	77	0.398941	0.739989	276	0.384321
67	2006	0.695051	77	0.400762	0.731171	262	0.398447
67	2007	0.695051	77	0.395164	0.743609	267	0.399692
67	2008	0.695051	77	0.391576	0.740268	271	0.395355
67	2009	0.695051	77	0.395029	0.744283	271	0.397203
67	2010	0.695051	77	0.399221	0.741164	274	0.39324
68	1992	0.679741	135	0.540506	0.743897	282	0.445578
68	1993	0.679741	135	0.539018	0.743897	282	0.445512
68	1994	0.679741	135	0.5374	0.745176	283	0.45093
68	1995	0.679741	135	0.535481	0.745852	281	0.445929
68	1996	0.679741	135	0.535817	0.745515	282	0.444985
68	1997	0.679741	135	0.535793	0.745176	283	0.444548
68	1998	0.679741	135	0.535529	0.745176	283	0.442292
68	1999	0.679741	135	0.5356	0.745176	283	0.445826
68	2000	0.679058	123	0.575837	0.745515	282	0.449001
68	2001	0.699826	132	0.549721	0.743879	282	0.446699
68	2002	0.699826	132	0.549818	0.744218	281	0.444608
68	2003	0.699826	132	0.549576	0.744218	281	0.44673
68	2004	0.699826	132	0.549247	0.744218	281	0.447749
68	2005	0.700364	130	0.551366	0.744218	281	0.445125
68	2006	0.700364	130	0.554061	0.744218	281	0.447361
68	2007	0.700364	130	0.553187	0.743968	277	0.448484
68	2008	0.701786	140	0.516542	0.743968	277	0.448086
68	2009	0.701786	140	0.517392	0.743968	277	0.449887
68	2010	0.701786	140	0.519833	0.743968	277	0.455627
69	1992	0.685273	62	0.363981	0.685273	62	0.363981
69	1993	0.692945	63	0.373336	0.692945	63	0.373336
69	1994	0.679698	92	0.354188	0.679698	92	0.354188
69	1995	0.679698	92	0.359287	0.679698	92	0.359287
69	1996	0.679698	92	0.364034	0.679698	92	0.364034
69	1997	0.679698	92	0.363632	0.679698	92	0.363632
69	1998	0.688294	86	0.351167	0.688294	86	0.351167
69	1999	0.688294	86	0.352367	0.688294	86	0.352367
69	2000	0.688294	86	0.352408	0.688294	86	0.352408
69	2001	0.688294	86	0.351877	0.688294	86	0.351877
69	2002	0.688294	86	0.351926	0.688294	86	0.351926
69	2003	0.688294	86	0.35051	0.688294	86	0.35051
69	2004	0.688294	86	0.3504	0.688294	86	0.3504
69	2005	0.688294	86	0.355762	0.688294	86	0.355762
69	2006	0.688294	86	0.34498	0.688294	86	0.34498
69	2007	0.688294	86	0.347884	0.688294	86	0.347884
69	2008	0.688294	86	0.348681	0.688294	86	0.348681
69	2009	0.688294	86	0.34824	0.688294	86	0.34824
69	2010	0.688294	86	0.350683	0.688294	86	0.350683
70	1992	0.701343	103	0.347669	0.714907	214	0.363747
70	1993	0.701343	103	0.353275	0.741448	228	0.349664
70	1994	0.701343	103	0.357814	0.740341	225	0.350255
70	1995	0.701343	103	0.359349	0.710912	210	0.369514
70	1996	0.701343	103	0.362383	0.715785	211	0.36712
70	1997	0.701343	103	0.365453	0.714108	214	0.361538
70	1998	0.701343	103	0.367419	0.715325	212	0.364251
70	1999	0.701343	103	0.368028	0.714582	213	0.366838
70	2000	0.701343	103	0.371352	0.714582	213	0.366932
70	2001	0.701343	103	0.372336	0.721017	224	0.374202
70	2002	0.701343	103	0.373517	0.715687	216	0.384413
70	2003	0.701343	103	0.372502	0.713363	222	0.377708
70	2004	0.701343	103	0.37421	0.730015	232	0.361557
70	2005	0.701343	103	0.372475	0.726358	229	0.366383
70	2006	0.701343	103	0.370536	0.731618	236	0.36564
70	2007	0.701343	103	0.372724	0.723414	230	0.37573
70	2008	0.701343	103	0.374697	0.72515	227	0.374259
70	2009	0.701343	103	0.376533	0.742107	244	0.357547
70	2010	0.701343	103	0.373707	0.747664	245	0.354186
72	1992	0.654679	78	0.473601	0.728027	162	0.408205
72	1993	0.654679	78	0.473775	0.728027	162	0.401591
72	1994	0.654679	78	0.469038	0.728027	162	0.396339
72	1995	0.654679	78	0.4734	0.728027	162	0.397975
72	1996	0.654679	78	0.47384	0.728027	162	0.413427
72	1997	0.654679	78	0.471333	0.728804	161	0.385807
72	1998	0.654679	78	0.470277	0.727463	163	0.384839
72	1999	0.654679	78	0.473592	0.725529	165	0.386107
72	2000	0.654679	78	0.472942	0.721641	166	0.386866
72	2001	0.654679	78	0.480632	0.726108	168	0.41009
72	2002	0.654679	78	0.475355	0.722573	186	0.397094
72	2003	0.654679	78	0.470742	0.722583	198	0.381171
72	2004	0.654679	78	0.463554	0.714502	183	0.370881
72	2005	0.654679	78	0.467756	0.719898	191	0.364247
72	2006	0.654679	78	0.46639	0.730533	192	0.358301
72	2007	0.654679	78	0.468584	0.724489	199	0.349423
72	2008	0.654679	78	0.467618	0.724131	200	0.351719
72	2009	0.654679	78	0.46978	0.724131	200	0.360357
72	2010	0.65487	77	0.466521	0.711979	185	0.379118
73	1992	0.65999	98	0.468396	0.673016	109	0.486929
73	1993	0.65999	98	0.465376	0.706271	135	0.453038
73	1994	0.675379	104	0.456661	0.70182	141	0.445263
73	1995	0.675379	104	0.457104	0.697368	140	0.459125
73	1996	0.675379	104	0.460252	0.694884	137	0.459262
73	1997	0.675379	104	0.448143	0.700551	143	0.452393
73	1998	0.670526	107	0.449412	0.710671	151	0.449244
73	1999	0.671272	106	0.455654	0.711616	149	0.441772
73	2000	0.671203	115	0.441676	0.712306	181	0.436169
73	2001	0.671203	115	0.443648	0.707224	182	0.428635
73	2002	0.671232	107	0.463427	0.723621	191	0.414114
73	2003	0.671203	115	0.437982	0.717523	193	0.425454
73	2004	0.675078	119	0.45066	0.722012	206	0.407469
73	2005	0.683104	123	0.447659	0.726664	196	0.422154
73	2006	0.683104	123	0.450625	0.726251	209	0.4197
73	2007	0.683104	123	0.448383	0.730815	208	0.422252
73	2008	0.683104	123	0.451661	0.731735	212	0.421647
73	2009	0.679124	122	0.445588	0.734156	207	0.409512
73	2010	0.679124	122	0.449091	0.733628	188	0.449229
74	1992	0.719053	84	0.266903	0.746395	165	0.345751
74	1993	0.717511	86	0.27727	0.747849	212	0.315174
74	1994	0.717511	86	0.278368	0.740301	225	0.276473
74	1995	0.717511	86	0.277275	0.756972	205	0.301233
74	1996	0.717511	86	0.280294	0.750764	205	0.318602
74	1997	0.717511	86	0.278697	0.750706	213	0.32477
74	1998	0.717511	86	0.280148	0.762349	213	0.322405
74	1999	0.717511	86	0.280434	0.75187	212	0.333026
74	2000	0.717511	86	0.28126	0.75187	216	0.340443
74	2001	0.717511	86	0.279494	0.751288	230	0.317065
74	2002	0.717511	86	0.281811	0.756538	203	0.321055
74	2003	0.717511	86	0.281303	0.759258	219	0.307167
74	2004	0.717511	86	0.280511	0.760225	205	0.345484
74	2005	0.717511	86	0.280762	0.761412	221	0.32582
74	2006	0.717511	86	0.281019	0.761543	207	0.34159
74	2007	0.717511	86	0.278585	0.762498	205	0.321093
74	2008	0.717511	86	0.279363	0.763292	204	0.319474
74	2009	0.717511	86	0.285859	0.763292	204	0.319034
74	2010	0.717511	86	0.289254	0.755087	187	0.345776
75	1992	0.690748	79	0.212792	0.731922	99	0.337306
75	1993	0.690748	79	0.212379	0.732399	96	0.339879
75	1994	0.690748	79	0.214328	0.731922	99	0.341159
75	1995	0.690748	79	0.21257	0.7364	115	0.314694
75	1996	0.690748	79	0.218237	0.738754	106	0.322918
75	1997	0.690748	79	0.219873	0.736703	110	0.325179
75	1998	0.690748	79	0.223065	0.73537	118	0.313832
75	1999	0.690748	79	0.220787	0.732696	156	0.31722
75	2000	0.690748	79	0.220584	0.734605	151	0.322456
75	2001	0.690748	79	0.221076	0.741579	152	0.325119
75	2002	0.690748	79	0.224439	0.737618	161	0.312102
75	2003	0.690748	79	0.224191	0.741439	152	0.319234
75	2004	0.690748	79	0.224672	0.733679	147	0.327944
75	2005	0.690748	79	0.225	0.735809	172	0.297297
75	2006	0.690748	79	0.224941	0.752873	170	0.294212
75	2007	0.690748	79	0.228055	0.743474	155	0.335634
75	2008	0.690748	79	0.227653	0.744541	160	0.311395
75	2009	0.690748	79	0.226041	0.739171	167	0.307513
75	2010	0.690748	79	0.224356	0.749345	165	0.321802
79	1992	0.661	89	0.538206	0.741852	282	0.454796
79	1993	0.661	89	0.531751	0.741852	282	0.452866
79	1994	0.661	89	0.527708	0.74474	284	0.44997
79	1995	0.664576	87	0.52144	0.742915	280	0.445626
79	1996	0.664576	87	0.522554	0.742915	280	0.44921
79	1997	0.680457	80	0.552331	0.742915	280	0.44783
79	1998	0.680457	80	0.554579	0.742915	280	0.447974
79	1999	0.680457	80	0.554789	0.747195	278	0.45165
79	2000	0.680457	80	0.558108	0.742577	281	0.451998
79	2001	0.680457	80	0.553368	0.744279	276	0.454946
79	2002	0.680457	80	0.555086	0.747195	278	0.456094
79	2003	0.665624	87	0.529665	0.743712	282	0.455585
79	2004	0.665624	87	0.529617	0.745302	283	0.456365
79	2005	0.664276	94	0.50984	0.746683	279	0.461354
79	2006	0.67006	104	0.506375	0.744024	282	0.458884
79	2007	0.67006	104	0.505331	0.745072	279	0.465117
79	2008	0.675462	105	0.509014	0.745072	279	0.450343
79	2009	0.675462	105	0.50951	0.745072	279	0.450403
79	2010	0.675462	105	0.510034	0.745072	279	0.454527
80	1992	0.651444	91	0.492561	0.698111	139	0.471397
80	1993	0.651367	87	0.511063	0.702374	138	0.480713
80	1994	0.651367	87	0.513457	0.709999	138	0.48422
80	1995	0.651367	87	0.511953	0.709367	139	0.483295
80	1996	0.651367	87	0.50721	0.709114	140	0.49343
80	1997	0.651367	87	0.490965	0.709114	140	0.492796
80	1998	0.651367	87	0.49038	0.710223	139	0.470114
80	1999	0.651367	87	0.487236	0.709114	140	0.474368
80	2000	0.651367	87	0.491107	0.709114	140	0.494881
80	2001	0.651367	87	0.490775	0.709114	140	0.492742
80	2002	0.651139	88	0.495289	0.708644	141	0.492442
80	2003	0.650766	89	0.501351	0.729647	226	0.395891
80	2004	0.649948	94	0.499068	0.731847	250	0.389899
80	2005	0.650821	102	0.495134	0.728429	233	0.413307
80	2006	0.650821	102	0.504376	0.728866	237	0.404581
80	2007	0.650821	102	0.499808	0.729436	228	0.419003
80	2008	0.650821	102	0.49909	0.733755	241	0.396877
80	2009	0.656012	103	0.500172	0.724026	238	0.408465
80	2010	0.656161	104	0.508499	0.727318	234	0.422732
81	1992	0.753973	118	0.32509	0.76756	146	0.340985
81	1993	0.753973	118	0.326686	0.76756	146	0.350784
81	1994	0.753973	118	0.326752	0.76756	146	0.353753
81	1995	0.753973	118	0.338012	0.76756	146	0.357395
81	1996	0.751474	146	0.313244	0.766439	215	0.296544
81	1997	0.751474	146	0.31644	0.767451	218	0.290855
81	1998	0.751474	146	0.319401	0.76647	219	0.311163
81	1999	0.751474	146	0.31905	0.764158	219	0.319935
81	2000	0.751474	146	0.319546	0.770131	223	0.320971
81	2001	0.751474	146	0.320816	0.765949	226	0.328381
81	2002	0.751474	146	0.323461	0.768053	229	0.337415
81	2003	0.751474	146	0.322686	0.75706	232	0.342778
81	2004	0.751474	146	0.322452	0.752184	219	0.335771
81	2005	0.751474	146	0.32327	0.765694	242	0.338505
81	2006	0.751474	146	0.323798	0.768866	233	0.328312
81	2007	0.751474	146	0.324597	0.752202	235	0.337806
81	2008	0.751474	146	0.325576	0.768487	238	0.329682
81	2009	0.751474	146	0.325272	0.764069	245	0.324949
81	2010	0.751474	146	0.325901	0.758871	251	0.312015
83	1992	0.703832	58	0.22723	0.739307	117	0.342935
83	1993	0.703832	58	0.229408	0.739307	117	0.333814
83	1994	0.703832	58	0.228424	0.734244	129	0.309574
83	1995	0.703832	58	0.226072	0.743782	139	0.311358
83	1996	0.703832	58	0.226309	0.722385	138	0.303391
83	1997	0.703832	58	0.22713	0.729028	144	0.296418
83	1998	0.703832	58	0.227706	0.741932	122	0.326144
83	1999	0.703832	58	0.227741	0.747547	124	0.344022
83	2000	0.703832	58	0.230133	0.745845	126	0.341552
83	2001	0.703832	58	0.229483	0.745845	126	0.329103
83	2002	0.703832	58	0.22951	0.73736	123	0.310751
83	2003	0.703832	58	0.229057	0.737923	122	0.315872
83	2004	0.703832	58	0.226508	0.737923	122	0.318748
83	2005	0.703832	58	0.224507	0.705745	164	0.325985
83	2006	0.703832	58	0.223806	0.725176	165	0.329541
83	2007	0.703832	58	0.223088	0.726384	163	0.326972
83	2008	0.703832	58	0.224547	0.726954	162	0.31943
83	2009	0.703832	58	0.224658	0.728006	142	0.358893
83	2010	0.703832	58	0.225777	0.734771	143	0.362972
84	1992	0.671321	150	0.516016	0.729761	230	0.441057
84	1993	0.680641	158	0.497647	0.726996	256	0.409812
84	1994	0.679571	160	0.49712	0.730974	262	0.406166
84	1995	0.679511	158	0.495102	0.732343	257	0.4128
84	1996	0.679511	158	0.496533	0.735309	262	0.412849
84	1997	0.679511	158	0.495667	0.731806	265	0.406743
84	1998	0.670447	154	0.506971	0.734145	266	0.415287
84	1999	0.670274	152	0.509644	0.732201	265	0.418768
84	2000	0.670274	152	0.508494	0.732335	265	0.415366
84	2001	0.670274	152	0.509129	0.733736	267	0.415006
84	2002	0.670274	152	0.509253	0.733231	262	0.424149
84	2003	0.670274	152	0.508329	0.735212	268	0.421002
84	2004	0.670274	152	0.506523	0.743903	271	0.414647
84	2005	0.670274	152	0.505018	0.742358	270	0.412744
84	2006	0.676803	158	0.505639	0.743718	271	0.41833
84	2007	0.676803	158	0.505329	0.744751	268	0.420631
84	2008	0.676803	158	0.506121	0.745028	267	0.432572
84	2009	0.676803	158	0.507073	0.745081	273	0.424967
84	2010	0.676803	158	0.507511	0.746012	270	0.428267
86	1992	0.733312	137	0.426311	0.746699	184	0.427377
86	1993	0.733312	137	0.425147	0.746699	184	0.42328
86	1994	0.733312	137	0.42466	0.74708	183	0.425527
86	1995	0.733312	137	0.422178	0.745783	185	0.419805
86	1996	0.734127	136	0.419545	0.748009	186	0.410974
86	1997	0.734127	136	0.416417	0.736547	182	0.401229
86	1998	0.734127	136	0.418476	0.745151	186	0.399307
86	1999	0.734127	136	0.420431	0.746275	184	0.415021
86	2000	0.734127	136	0.414716	0.746275	184	0.411409
86	2001	0.734127	136	0.416686	0.737651	180	0.406329
86	2002	0.734127	136	0.415065	0.749503	209	0.390946
86	2003	0.734127	136	0.417452	0.749975	213	0.38337
86	2004	0.734127	136	0.413953	0.743161	222	0.388307
86	2005	0.735306	139	0.428315	0.736861	218	0.394232
86	2006	0.735306	139	0.429801	0.736591	210	0.406841
86	2007	0.735306	139	0.430823	0.74618	211	0.394077
86	2008	0.735306	139	0.427984	0.738452	198	0.395331
86	2009	0.735306	139	0.43204	0.745675	216	0.397162
86	2010	0.735306	139	0.433943	0.745622	211	0.394503
87	1992	0.71139	122	0.382971	0.71139	122	0.382971
87	1993	0.711962	121	0.381872	0.711962	121	0.381872
87	1994	0.711962	121	0.377504	0.711962	121	0.377504
87	1995	0.711962	121	0.375795	0.711962	121	0.375795
87	1996	0.711962	121	0.38033	0.711962	121	0.38033
87	1997	0.711962	121	0.380622	0.711962	121	0.380622
87	1998	0.711962	121	0.384846	0.711962	121	0.384846
87	1999	0.711962	121	0.384391	0.711962	121	0.384391
87	2000	0.711962	121	0.378313	0.711962	121	0.378313
87	2001	0.711962	121	0.384175	0.711962	121	0.384175
87	2002	0.711962	121	0.384257	0.711962	121	0.384257
87	2003	0.711962	121	0.379283	0.711962	121	0.379283
87	2004	0.711962	121	0.370623	0.711962	121	0.370623
87	2005	0.711962	121	0.370707	0.711962	121	0.370707
87	2006	0.711962	121	0.373499	0.711962	121	0.373499
87	2007	0.711962	121	0.37231	0.711962	121	0.37231
87	2008	0.711962	121	0.372657	0.711962	121	0.372657
87	2009	0.711962	121	0.377197	0.711962	121	0.377197
87	2010	0.711962	121	0.375491	0.711962	121	0.375491
88	1992	0.685779	75	0.341988	0.704898	94	0.419655
88	1993	0.685779	75	0.343094	0.704898	94	0.406771
88	1994	0.685779	75	0.346214	0.704898	94	0.409916
88	1995	0.685779	75	0.340398	0.704898	94	0.402324
88	1996	0.685779	75	0.340709	0.704898	94	0.405835
88	1997	0.685779	75	0.33924	0.704898	94	0.400945
88	1998	0.685779	75	0.338251	0.704898	94	0.406897
88	1999	0.685779	75	0.341416	0.704898	94	0.404198
88	2000	0.685779	75	0.342608	0.704898	94	0.411159
88	2001	0.685779	75	0.342911	0.704898	94	0.414759
88	2002	0.685779	75	0.343415	0.704898	94	0.420304
88	2003	0.685779	75	0.338723	0.723791	111	0.384251
88	2004	0.685779	75	0.34489	0.724943	110	0.359922
88	2005	0.685779	75	0.348099	0.707156	117	0.328077
88	2006	0.685779	75	0.345632	0.707156	117	0.323373
88	2007	0.685779	75	0.352139	0.707156	117	0.327905
88	2008	0.685779	75	0.353174	0.711104	82	0.365828
88	2009	0.685779	75	0.350452	0.711104	82	0.370544
88	2010	0.685779	75	0.350728	0.685779	75	0.350728
89	1992	0.737737	150	0.38438	0.738964	177	0.37392
89	1993	0.733453	156	0.409771	0.754329	232	0.367051
89	1994	0.733453	156	0.41033	0.751848	237	0.366535
89	1995	0.733453	156	0.411063	0.740492	243	0.351246
89	1996	0.733453	156	0.410172	0.739862	247	0.346834
89	1997	0.733453	156	0.412228	0.751822	260	0.344475
89	1998	0.733453	156	0.411813	0.738744	250	0.362454
89	1999	0.733453	156	0.412782	0.738445	251	0.367372
89	2000	0.733453	156	0.413259	0.740194	241	0.379886
89	2001	0.733453	156	0.412372	0.744344	243	0.373179
89	2002	0.733453	156	0.411961	0.736823	251	0.359294
89	2003	0.733453	156	0.411444	0.731626	242	0.376769
89	2004	0.733453	156	0.410809	0.739942	247	0.365324
89	2005	0.733453	156	0.410371	0.735814	242	0.37735
89	2006	0.733453	156	0.409086	0.73436	246	0.372776
89	2007	0.733453	156	0.410044	0.738366	251	0.3732
89	2008	0.733453	156	0.407058	0.74008	249	0.374287
89	2009	0.733453	156	0.406033	0.752755	258	0.359653
89	2010	0.733453	156	0.405332	0.748725	262	0.353709
90	1992	0.751171	105	0.321723	0.756663	115	0.377082
90	1993	0.751171	105	0.319939	0.756027	116	0.382722
90	1994	0.751171	105	0.321083	0.756027	116	0.385079
90	1995	0.751171	105	0.320142	0.762466	184	0.31287
90	1996	0.751171	105	0.320304	0.762716	201	0.273998
90	1997	0.751171	105	0.319408	0.760134	189	0.289185
90	1998	0.751171	105	0.321085	0.764798	181	0.297757
90	1999	0.751171	105	0.319217	0.752153	199	0.293138
90	2000	0.751171	105	0.31805	0.742502	195	0.293333
90	2001	0.751171	105	0.318492	0.757894	189	0.296222
90	2002	0.751171	105	0.319709	0.747363	199	0.301181
90	2003	0.750341	106	0.325629	0.745643	202	0.283041
90	2004	0.750341	106	0.325416	0.741606	199	0.292554
90	2005	0.750341	106	0.325282	0.73846	191	0.29733
90	2006	0.750341	106	0.325497	0.753489	198	0.279218
90	2007	0.750341	106	0.3252	0.753489	198	0.282142
90	2008	0.750341	106	0.326549	0.756348	177	0.326288
90	2009	0.750341	106	0.326349	0.755145	179	0.324454
90	2010	0.750341	106	0.326249	0.746918	198	0.297018
91	1992	0.702276	85	0.365581	0.72947	104	0.437138
91	1993	0.702276	85	0.365257	0.72947	104	0.437121
91	1994	0.702276	85	0.36424	0.72947	104	0.434456
91	1995	0.702276	85	0.366563	0.738057	106	0.433925
91	1996	0.702276	85	0.362928	0.730905	121	0.385777
91	1997	0.731545	114	0.4176	0.749795	227	0.340332
91	1998	0.731545	114	0.419496	0.7542	214	0.365902
91	1999	0.723319	131	0.390625	0.747061	228	0.362955
91	2000	0.730643	141	0.394121	0.750106	215	0.394552
91	2001	0.730643	141	0.40382	0.746811	227	0.383719
91	2002	0.730643	141	0.400348	0.750666	219	0.386662
91	2003	0.730643	141	0.403886	0.757083	205	0.412262
91	2004	0.730643	141	0.403752	0.755214	204	0.418888
91	2005	0.730643	141	0.406923	0.754516	206	0.414236
91	2006	0.730643	141	0.404583	0.750958	217	0.391694
91	2007	0.730643	141	0.404841	0.748791	237	0.381815
91	2008	0.730643	141	0.407909	0.751792	223	0.393773
91	2009	0.730643	141	0.401266	0.751792	223	0.388043
91	2010	0.730643	141	0.400573	0.753538	229	0.391448
93	1992	0.72309	131	0.424115	0.74746	149	0.443388
93	1993	0.72309	131	0.424261	0.74746	149	0.446196
93	1994	0.72309	131	0.426154	0.74746	149	0.444588
93	1995	0.72309	131	0.425754	0.74746	149	0.445212
93	1996	0.72309	131	0.428589	0.742186	170	0.449198
93	1997	0.72309	131	0.429368	0.728325	186	0.414304
93	1998	0.72309	131	0.430118	0.733886	194	0.411841
93	1999	0.72309	131	0.430185	0.740511	191	0.412486
93	2000	0.72309	131	0.429809	0.739584	192	0.420816
93	2001	0.72309	131	0.430318	0.74144	189	0.42252
93	2002	0.72309	131	0.429914	0.741031	190	0.417065
93	2003	0.72309	131	0.43113	0.736261	182	0.410785
93	2004	0.72309	131	0.430611	0.740667	186	0.409401
93	2005	0.72309	131	0.431177	0.743001	184	0.413759
93	2006	0.72309	131	0.430915	0.746309	175	0.430002
93	2007	0.72309	131	0.431056	0.743152	186	0.405489
93	2008	0.72309	131	0.430442	0.741436	188	0.405316
93	2009	0.72309	131	0.430286	0.736272	187	0.409273
93	2010	0.72309	131	0.430158	0.741029	189	0.403979
95	1992	0.735243	123	0.392349	0.743245	166	0.385279
95	1993	0.730827	128	0.409498	0.739736	203	0.361617
95	1994	0.730827	128	0.410085	0.734147	200	0.362992
95	1995	0.730827	128	0.408399	0.731072	202	0.358434
95	1996	0.730827	128	0.41088	0.725535	221	0.333145
95	1997	0.730827	128	0.410324	0.731816	231	0.341792
95	1998	0.730827	128	0.408107	0.721941	228	0.336671
95	1999	0.730827	128	0.407934	0.723119	228	0.363532
95	2000	0.730827	128	0.411212	0.719217	227	0.361461
95	2001	0.730827	128	0.409182	0.722986	213	0.37301
95	2002	0.730827	128	0.409886	0.727194	219	0.370387
95	2003	0.730827	128	0.409825	0.726531	232	0.356038
95	2004	0.730827	128	0.410948	0.739446	241	0.353875
95	2005	0.730827	128	0.41049	0.732364	233	0.363855
95	2006	0.730827	128	0.408526	0.733356	236	0.357059
95	2007	0.730827	128	0.407665	0.738392	222	0.382178
95	2008	0.730827	128	0.408143	0.751612	223	0.376588
95	2009	0.730827	128	0.405011	0.748708	240	0.348434
95	2010	0.730827	128	0.40557	0.745663	248	0.346181
96	1992	0	0	0	0.733711	249	0.442349
96	1993	0	0	0	0.735668	244	0.437245
96	1994	0	0	0	0.735208	245	0.433086
96	1995	0	0	0	0.734769	244	0.439536
96	1996	0	0	0	0.737384	243	0.439392
96	1997	0	0	0	0.734194	243	0.433845
96	1998	0	0	0	0.734445	247	0.423817
96	1999	0	0	0	0.734199	248	0.426827
96	2000	0	0	0	0.732917	247	0.433692
96	2001	0	0	0	0.734452	247	0.428484
96	2002	0	0	0	0.736058	248	0.440938
96	2003	0	0	0	0.735931	246	0.443081
96	2004	0	0	0	0.733535	245	0.443807
96	2005	0	0	0	0.732204	249	0.433967
96	2006	0	0	0	0.735614	245	0.431854
96	2007	0	0	0	0.734683	247	0.427319
96	2008	0	0	0	0.735232	241	0.43669
96	2009	0	0	0	0.733601	241	0.435921
96	2010	0	0	0	0.723518	233	0.447122
97	1992	0.707146	168	0.435936	0.727758	233	0.439857
97	1993	0.700365	160	0.44831	0.737707	239	0.426818
97	1994	0.699893	161	0.448394	0.748996	246	0.422385
97	1995	0.700957	160	0.44296	0.745359	242	0.422995
97	1996	0.696896	156	0.442812	0.73308	236	0.432333
97	1997	0.697423	155	0.439625	0.731508	236	0.430227
97	1998	0.697423	155	0.443652	0.723232	244	0.428546
97	1999	0.697423	155	0.444861	0.730621	238	0.44316
97	2000	0.697423	155	0.441715	0.730869	247	0.420582
97	2001	0.698502	154	0.437937	0.734486	239	0.432856
97	2002	0.698502	154	0.437374	0.732713	258	0.414887
97	2003	0.704769	164	0.437769	0.733028	242	0.440421
97	2004	0.704769	164	0.435901	0.730907	264	0.412261
97	2005	0.704769	164	0.43645	0.743304	268	0.418951
97	2006	0.704769	164	0.436447	0.726596	248	0.445114
97	2007	0.704769	164	0.433781	0.743943	266	0.41644
97	2008	0.704769	164	0.433613	0.741635	257	0.42769
97	2009	0.704769	164	0.434529	0.74439	250	0.438597
97	2010	0.704769	164	0.427938	0.74312	274	0.413818
98	1992	0.684389	102	0.562675	0.729372	235	0.38451
98	1993	0.684389	102	0.563983	0.735536	213	0.425802
98	1994	0.683964	102	0.559702	0.732098	239	0.400056
98	1995	0.68465	101	0.5586	0.732949	237	0.398605
98	1996	0.68465	101	0.563316	0.727197	241	0.410847
98	1997	0.68465	101	0.559135	0.729243	235	0.415109
98	1998	0.68465	101	0.56193	0.729523	234	0.3989
98	1999	0.684616	100	0.564605	0.728861	236	0.414687
98	2000	0.684616	100	0.566193	0.744231	231	0.439762
98	2001	0.684616	100	0.564941	0.74288	239	0.426878
98	2002	0.684616	100	0.56454	0.724645	236	0.427188
98	2003	0.684616	100	0.563754	0.728441	238	0.424676
98	2004	0.684616	100	0.560636	0.74535	262	0.407084
98	2005	0.684616	100	0.560064	0.741552	253	0.418279
98	2006	0.684616	100	0.561413	0.743931	256	0.415969
98	2007	0.684616	100	0.565167	0.74247	252	0.421584
98	2008	0.694299	102	0.560855	0.747411	262	0.407828
98	2009	0.694299	102	0.565516	0.741952	262	0.408812
98	2010	0.69717	103	0.569313	0.746756	252	0.431369
99	1992	0.890145	11	0.555929	0.731454	223	0.327558
99	1993	0.890145	11	0.571542	0.732295	221	0.329546
99	1994	0.890145	11	0.571614	0.730791	225	0.330949
99	1995	0.890145	11	0.571989	0.735702	235	0.32109
99	1996	0.890145	11	0.572735	0.734445	238	0.328543
99	1997	0.890145	11	0.574939	0.734854	237	0.328756
99	1998	0.890145	11	0.562619	0.735814	235	0.335808
99	1999	0.890145	11	0.568137	0.729142	229	0.347745
99	2000	0.890145	11	0.569954	0.729392	228	0.358355
99	2001	0.890145	11	0.574724	0.730503	226	0.364442
99	2002	0.890145	11	0.5804	0.733953	240	0.358249
99	2003	0.890145	11	0.582531	0.73329	235	0.361773
99	2004	0.890145	11	0.579761	0.729655	228	0.381025
99	2005	0.890145	11	0.576558	0.734599	236	0.378359
99	2006	0.890145	11	0.578775	0.730574	242	0.370071
99	2007	0.890145	11	0.585394	0.717761	222	0.39995
99	2008	0.890145	11	0.589217	0.724369	230	0.388701
99	2009	0.890145	11	0.596966	0.734987	237	0.382178
99	2010	0.890145	11	0.593647	0.742838	235	0.382338
100	1992	0.706024	204	0.443219	0.717992	236	0.432865
100	1993	0.706024	204	0.444516	0.729376	245	0.417491
100	1994	0.706024	204	0.443994	0.732513	248	0.417227
100	1995	0.706024	204	0.443413	0.724862	248	0.417618
100	1996	0.706024	204	0.443706	0.735816	261	0.404714
100	1997	0.706024	204	0.44346	0.735706	260	0.401756
100	1998	0.706024	204	0.4437	0.724585	254	0.415915
100	1999	0.706024	204	0.444538	0.73411	264	0.410334
100	2000	0.706024	204	0.445083	0.732601	264	0.411392
100	2001	0.706024	204	0.446144	0.731974	265	0.41182
100	2002	0.706024	204	0.44535	0.736605	269	0.416133
100	2003	0.706024	204	0.445533	0.735759	271	0.415676
100	2004	0.706024	204	0.444023	0.735121	263	0.407264
100	2005	0.706024	204	0.443528	0.735898	266	0.407974
100	2006	0.706024	204	0.444457	0.732795	259	0.41903
100	2007	0.706024	204	0.44381	0.736524	263	0.409099
100	2008	0.706024	204	0.444698	0.737775	264	0.409537
100	2009	0.706024	204	0.443701	0.73467	262	0.409981
100	2010	0.706024	204	0.444236	0.738061	263	0.410022
101	1992	0.739346	168	0.366641	0.746021	277	0.352673
101	1993	0.739346	168	0.365741	0.737411	264	0.373395
101	1994	0.739346	168	0.365558	0.745884	277	0.363498
101	1995	0.739346	168	0.365793	0.735452	270	0.3731
101	1996	0.739346	168	0.364064	0.736386	268	0.383501
101	1997	0.739346	168	0.362716	0.736568	268	0.377059
101	1998	0.739346	168	0.364263	0.736962	269	0.367113
101	1999	0.739346	168	0.363748	0.737624	265	0.379533
101	2000	0.739346	168	0.363837	0.736268	271	0.383368
101	2001	0.739346	168	0.36414	0.738439	265	0.386568
101	2002	0.739346	168	0.3652	0.737072	269	0.381646
101	2003	0.739346	168	0.364042	0.736504	268	0.390995
101	2004	0.739346	168	0.365815	0.73707	269	0.387907
101	2005	0.739346	168	0.36534	0.738035	266	0.395518
101	2006	0.739346	168	0.364761	0.73707	269	0.389138
101	2007	0.739346	168	0.365008	0.736914	267	0.389554
101	2008	0.739346	168	0.365336	0.736662	270	0.385944
101	2009	0.739346	168	0.364162	0.73637	268	0.377822
101	2010	0.739346	168	0.362614	0.747733	273	0.366157
102	1992	0.687823	185	0.460806	0.695226	192	0.47459
102	1993	0.687823	185	0.463947	0.695335	191	0.482153
102	1994	0.688492	183	0.467843	0.724303	208	0.45453
102	1995	0.688492	183	0.466484	0.700784	194	0.47591
102	1996	0.688492	183	0.467926	0.700784	194	0.478358
102	1997	0.688492	183	0.468476	0.713347	213	0.448139
102	1998	0.688492	183	0.467997	0.721593	208	0.461275
102	1999	0.688492	183	0.469863	0.71681	207	0.468276
102	2000	0.688492	183	0.469881	0.722016	207	0.469931
102	2001	0.688492	183	0.469337	0.728047	208	0.470591
102	2002	0.688492	183	0.468837	0.725121	220	0.450304
102	2003	0.688492	183	0.474668	0.72866	238	0.422301
102	2004	0.688492	183	0.475512	0.72671	226	0.462255
102	2005	0.687423	197	0.444223	0.725027	229	0.460365
102	2006	0.687423	197	0.444736	0.721013	242	0.434396
102	2007	0.687423	197	0.444366	0.736722	251	0.41941
102	2008	0.687423	197	0.445382	0.724441	237	0.44068
102	2009	0.687423	197	0.446434	0.724163	238	0.438914
102	2010	0.688492	183	0.480787	0.739756	243	0.43316
103	1992	0.69238	132	0.497059	0.726044	171	0.44632
103	1993	0.69238	132	0.492351	0.726812	164	0.456048
103	1994	0.69238	132	0.493488	0.732577	164	0.460546
103	1995	0.69238	132	0.495224	0.726757	156	0.467002
103	1996	0.69238	132	0.493542	0.726757	156	0.47093
103	1997	0.69238	132	0.492202	0.726757	156	0.464148
103	1998	0.69238	132	0.491166	0.724759	161	0.457811
103	1999	0.69238	132	0.488665	0.726757	156	0.471109
103	2000	0.69238	132	0.489431	0.726757	156	0.474474
103	2001	0.693728	130	0.489584	0.728924	160	0.460847
103	2002	0.693728	130	0.479726	0.738103	178	0.417401
103	2003	0.690935	129	0.483393	0.74038	183	0.430209
103	2004	0.689579	131	0.483707	0.731522	189	0.415077
103	2005	0.689579	131	0.483153	0.733117	192	0.441835
103	2006	0.689579	131	0.487757	0.741078	197	0.414665
103	2007	0.689579	131	0.486474	0.746778	201	0.420793
103	2008	0.69238	132	0.491682	0.746778	201	0.426833
103	2009	0.69238	132	0.488759	0.746778	201	0.419378
103	2010	0.69238	132	0.488059	0.746778	201	0.418227
104	1992	0.669683	81	0.384412	0.725479	265	0.395905
104	1993	0.671322	80	0.38022	0.742454	274	0.373602
104	1994	0.671322	80	0.380576	0.743578	271	0.37521
104	1995	0.671322	80	0.379947	0.741078	268	0.370985
104	1996	0.671322	80	0.38363	0.742979	272	0.382289
104	1997	0.671322	80	0.382505	0.742509	272	0.373717
104	1998	0.671322	80	0.379728	0.746352	272	0.376916
104	1999	0.671322	80	0.382875	0.745397	278	0.387914
104	2000	0.671322	80	0.38552	0.732815	271	0.399419
104	2001	0.671322	80	0.38616	0.742287	274	0.397013
104	2002	0.671322	80	0.383208	0.746426	272	0.404353
104	2003	0.671322	80	0.38116	0.744365	272	0.4082
104	2004	0.671322	80	0.379123	0.734357	268	0.422586
104	2005	0.671322	80	0.382768	0.732325	268	0.413327
104	2006	0.682126	84	0.386048	0.735684	269	0.429124
104	2007	0.682126	84	0.385285	0.734377	267	0.431927
104	2008	0.682126	84	0.384971	0.734377	267	0.429713
104	2009	0.682126	84	0.382288	0.735067	265	0.423441
104	2010	0.682126	84	0.38151	0.735811	264	0.433825
105	1992	0.670961	172	0.420015	0.720737	248	0.436138
105	1993	0.671318	171	0.42003	0.720737	248	0.439303
105	1994	0.671318	171	0.417074	0.72136	246	0.438138
105	1995	0.671318	171	0.417931	0.72338	241	0.439215
105	1996	0.67171	170	0.416486	0.722474	243	0.436877
105	1997	0.670006	175	0.41301	0.734243	254	0.419269
105	1998	0.670006	175	0.413479	0.722777	242	0.435267
105	1999	0.670006	175	0.417047	0.72436	250	0.436435
105	2000	0.670006	175	0.417415	0.724029	251	0.44052
105	2001	0.670006	175	0.418888	0.736742	258	0.429364
105	2002	0.670006	175	0.421472	0.724457	250	0.443455
105	2003	0.670006	175	0.421413	0.725109	248	0.442974
105	2004	0.670006	175	0.419992	0.724884	248	0.445306
105	2005	0.670006	175	0.422592	0.732248	257	0.432273
105	2006	0.670006	175	0.420289	0.731863	252	0.435241
105	2007	0.670006	175	0.420812	0.732506	251	0.439387
105	2008	0.670006	175	0.424091	0.731714	253	0.438797
105	2009	0.670006	175	0.425791	0.742993	262	0.424692
105	2010	0.670006	175	0.422537	0.737835	255	0.441317
106	1992	0.682631	170	0.497113	0.73992	282	0.422265
106	1993	0.681719	164	0.507937	0.741202	284	0.424028
106	1994	0.685916	162	0.518538	0.742836	284	0.429648
106	1995	0.683097	161	0.514134	0.741542	283	0.42293
106	1996	0.677143	158	0.517583	0.742496	285	0.424516
106	1997	0.677143	158	0.518518	0.742836	284	0.423112
106	1998	0.677143	158	0.518895	0.742836	284	0.426067
106	1999	0.676686	159	0.523139	0.742836	284	0.42958
106	2000	0.676686	159	0.522926	0.744341	285	0.436227
106	2001	0.676686	159	0.522902	0.741524	283	0.436023
106	2002	0.676351	160	0.52577	0.741524	283	0.441561
106	2003	0.674478	165	0.522066	0.743043	284	0.443953
106	2004	0.674478	165	0.521796	0.743043	284	0.442757
106	2005	0.674478	165	0.520385	0.743043	284	0.443761
106	2006	0.674478	165	0.52202	0.743043	284	0.445622
106	2007	0.674478	165	0.520704	0.742361	281	0.448528
106	2008	0.674478	165	0.521876	0.742361	281	0.450236
106	2009	0.674478	165	0.522099	0.742361	281	0.448818
106	2010	0.674478	165	0.522904	0.742361	281	0.450471
107	1992	0.750426	151	0.350857	0.742679	195	0.380168
107	1993	0.750426	151	0.350331	0.743381	194	0.374078
107	1994	0.750426	151	0.350527	0.743381	194	0.375243
107	1995	0.750426	151	0.351028	0.750369	218	0.349994
107	1996	0.746045	163	0.331737	0.750369	218	0.352941
107	1997	0.751661	172	0.334665	0.7467	253	0.369215
107	1998	0.750969	173	0.337471	0.751151	255	0.373587
107	1999	0.750969	173	0.336922	0.750816	256	0.373907
107	2000	0.750969	173	0.342059	0.75351	251	0.376174
107	2001	0.748058	181	0.337055	0.752878	257	0.37838
107	2002	0.748058	181	0.336073	0.752517	253	0.377264
107	2003	0.748058	181	0.335227	0.759977	254	0.3697
107	2004	0.748058	181	0.337505	0.763055	262	0.376368
107	2005	0.748058	181	0.336792	0.760419	270	0.364479
107	2006	0.748058	181	0.338696	0.752485	262	0.378475
107	2007	0.748058	181	0.339766	0.765109	264	0.375314
107	2008	0.748058	181	0.340048	0.7545	252	0.386162
107	2009	0.748058	181	0.339414	0.752593	252	0.372785
107	2010	0.748058	181	0.3397	0.754055	253	0.383155
108	1992	0.703748	106	0.500225	0.705822	131	0.464599
108	1993	0.703748	106	0.498312	0.704816	146	0.452895
108	1994	0.703748	106	0.494906	0.720555	151	0.446425
108	1995	0.697225	123	0.450235	0.750993	208	0.397694
108	1996	0.697225	123	0.452183	0.736276	215	0.38557
108	1997	0.697225	123	0.455721	0.730686	177	0.448777
108	1998	0.696945	131	0.440898	0.722747	195	0.418792
108	1999	0.696945	131	0.445563	0.742211	194	0.405199
108	2000	0.698335	137	0.453057	0.735546	243	0.388914
108	2001	0.702803	144	0.433104	0.740963	234	0.401632
108	2002	0.702803	144	0.432473	0.741023	234	0.406582
108	2003	0.702803	144	0.433781	0.731411	217	0.421748
108	2004	0.702803	144	0.43116	0.734401	249	0.3829
108	2005	0.702803	144	0.431724	0.73141	253	0.372385
108	2006	0.702803	144	0.426992	0.7337	237	0.387729
108	2007	0.702803	144	0.425769	0.729915	240	0.393877
108	2008	0.702803	144	0.423508	0.748699	245	0.393173
108	2009	0.702803	144	0.42573	0.746906	240	0.402482
108	2010	0.702803	144	0.426068	0.74725	239	0.398711
109	1992	0.756422	133	0.457139	0.757925	231	0.389339
109	1993	0.756422	133	0.454276	0.756893	233	0.376134
109	1994	0.756422	133	0.449674	0.756919	233	0.386641
109	1995	0.756422	133	0.453227	0.764412	232	0.389222
109	1996	0.756422	133	0.452175	0.757369	239	0.393117
109	1997	0.756422	133	0.452693	0.761974	225	0.412382
109	1998	0.756422	133	0.451076	0.765112	213	0.415323
109	1999	0.756422	133	0.454637	0.761305	235	0.401387
109	2000	0.756422	133	0.452503	0.767616	208	0.43238
109	2001	0.756422	133	0.453581	0.760037	261	0.401278
109	2002	0.756422	133	0.45054	0.754813	227	0.402985
109	2003	0.756422	133	0.451858	0.744476	221	0.405606
109	2004	0.756422	133	0.450593	0.753728	252	0.413073
109	2005	0.756422	133	0.451921	0.762145	257	0.406618
109	2006	0.756422	133	0.449829	0.760367	253	0.386904
109	2007	0.755514	134	0.455287	0.754871	251	0.407378
109	2008	0.755514	134	0.45422	0.752583	257	0.402474
109	2009	0.755514	134	0.455442	0.753199	257	0.406523
109	2010	0.755514	134	0.45608	0.761291	261	0.399831
110	1992	0.738015	140	0.49356	0.757636	283	0.435826
110	1993	0.738015	140	0.486199	0.757992	282	0.427574
110	1994	0.738644	139	0.486192	0.758402	281	0.432912
110	1995	0.738644	139	0.486443	0.758402	281	0.430778
110	1996	0.738644	139	0.487262	0.758402	281	0.431912
110	1997	0.741479	127	0.51678	0.758402	281	0.427921
110	1998	0.750057	121	0.535645	0.758839	280	0.431557
110	1999	0.74839	123	0.539028	0.758402	281	0.434587
110	2000	0.74839	123	0.539924	0.758402	281	0.439541
110	2001	0.74839	123	0.539156	0.758402	281	0.439391
110	2002	0.74839	123	0.539162	0.749212	273	0.451292
110	2003	0.744925	134	0.540192	0.747654	277	0.450056
110	2004	0.744925	134	0.540119	0.747654	277	0.45107
110	2005	0.744925	134	0.539514	0.747654	277	0.447747
110	2006	0.745522	133	0.538285	0.747654	277	0.447273
110	2007	0.745522	133	0.537474	0.749707	272	0.446746
110	2008	0.745522	133	0.537371	0.749707	272	0.446944
110	2009	0.745522	133	0.537584	0.749707	272	0.446961
110	2010	0.745522	133	0.537625	0.749707	272	0.447273
112	1992	0.659923	112	0.501704	0.738377	236	0.388212
112	1993	0.661725	128	0.455962	0.736722	225	0.401853
112	1994	0.690885	136	0.445725	0.72092	225	0.410221
112	1995	0.690885	136	0.441989	0.741965	245	0.388914
112	1996	0.695958	131	0.441951	0.731089	234	0.382569
112	1997	0.695958	131	0.446435	0.734151	227	0.415449
112	1998	0.695958	131	0.452194	0.723941	236	0.404164
112	1999	0.695958	131	0.446172	0.731758	234	0.408265
112	2000	0.695958	131	0.456338	0.731976	237	0.425162
112	2001	0.695958	131	0.454597	0.738354	227	0.425829
112	2002	0.695958	131	0.452756	0.727974	237	0.42317
112	2003	0.695958	131	0.451513	0.729702	227	0.430679
112	2004	0.695958	131	0.446657	0.728826	235	0.417695
112	2005	0.695958	131	0.448561	0.731759	238	0.414504
112	2006	0.695958	131	0.447184	0.729205	233	0.422705
112	2007	0.695958	131	0.442478	0.732933	236	0.428301
112	2008	0.670625	125	0.467031	0.735359	235	0.427613
112	2009	0.670625	125	0.465164	0.744621	250	0.406255
112	2010	0.670625	125	0.469609	0.732908	242	0.415653
113	1992	0.679419	141	0.401415	0.68288	142	0.402105
113	1993	0.678956	142	0.402871	0.688763	147	0.413397
113	1994	0.678956	142	0.405031	0.688115	149	0.423402
113	1995	0.678956	142	0.395084	0.688115	149	0.411499
113	1996	0.678956	142	0.391426	0.686518	153	0.412812
113	1997	0.678956	142	0.402813	0.686994	152	0.432626
113	1998	0.67791	143	0.407121	0.706069	212	0.374162
113	1999	0.704041	156	0.408128	0.712117	205	0.415056
113	2000	0.703089	157	0.413286	0.709087	202	0.424794
113	2001	0.703089	157	0.416175	0.721291	234	0.379537
113	2002	0.702253	158	0.425249	0.706542	222	0.413445
113	2003	0.696385	169	0.405588	0.70714	224	0.406337
113	2004	0.696385	169	0.402878	0.707564	225	0.401466
113	2005	0.694023	168	0.403654	0.715657	209	0.434876
113	2006	0.691554	167	0.406348	0.712991	211	0.428514
113	2007	0.694023	168	0.409579	0.708222	222	0.397221
113	2008	0.694023	168	0.404591	0.712543	209	0.410691
113	2009	0.694023	168	0.410348	0.712616	209	0.413822
113	2010	0.696385	169	0.408248	0.712746	208	0.400908
114	1992	0.753815	218	0.435	0.750783	243	0.428338
114	1993	0.753815	218	0.435331	0.753728	241	0.434463
114	1994	0.754634	220	0.440181	0.755334	242	0.437296
114	1995	0.754634	220	0.439477	0.753915	245	0.435571
114	1996	0.753857	221	0.438144	0.75414	245	0.425744
114	1997	0.753857	221	0.439715	0.753033	247	0.436218
114	1998	0.753857	221	0.441787	0.751988	250	0.42746
114	1999	0.753857	221	0.441538	0.752527	254	0.425856
114	2000	0.753857	221	0.442759	0.754515	249	0.437661
114	2001	0.753857	221	0.441593	0.765255	254	0.416628
114	2002	0.753857	221	0.443261	0.763324	258	0.421941
114	2003	0.753857	221	0.445716	0.764106	257	0.415261
114	2004	0.753857	221	0.44831	0.763864	262	0.418383
114	2005	0.753857	221	0.446515	0.760978	269	0.406581
114	2006	0.753857	221	0.444345	0.751253	258	0.418125
114	2007	0.753857	221	0.444454	0.75154	257	0.430724
114	2008	0.753857	221	0.448849	0.752812	254	0.4325
114	2009	0.753857	221	0.447909	0.752812	254	0.430349
114	2010	0.753857	221	0.446962	0.752033	256	0.43171
115	1992	0.719557	119	0.357104	0.742175	125	0.37098
115	1993	0.719557	119	0.359437	0.741187	126	0.381622
115	1994	0.719557	119	0.361133	0.73324	130	0.382822
115	1995	0.719557	119	0.358949	0.731607	128	0.396254
115	1996	0.719557	119	0.355513	0.747855	159	0.372943
115	1997	0.719557	119	0.357365	0.737759	142	0.390225
115	1998	0.719557	119	0.358105	0.738008	148	0.390707
115	1999	0.719557	119	0.353417	0.738797	141	0.393406
115	2000	0.719557	119	0.353832	0.743538	200	0.382123
115	2001	0.719557	119	0.353162	0.746048	188	0.371195
115	2002	0.719557	119	0.356216	0.725195	196	0.355005
115	2003	0.719557	119	0.350112	0.734761	182	0.367446
115	2004	0.719557	119	0.352205	0.725063	203	0.344725
115	2005	0.719557	119	0.348316	0.719088	190	0.34693
115	2006	0.719557	119	0.346707	0.727026	193	0.342543
115	2007	0.719557	119	0.344754	0.724698	197	0.351917
115	2008	0.719557	119	0.342817	0.724698	197	0.351365
115	2009	0.719557	119	0.342384	0.724698	197	0.358868
115	2010	0.719557	119	0.342893	0.730107	225	0.348809
116	1992	0.712192	102	0.419075	0.719378	119	0.465596
116	1993	0.712192	102	0.418498	0.720799	117	0.467015
116	1994	0.712192	102	0.418357	0.720799	117	0.465363
116	1995	0.712192	102	0.419929	0.728964	119	0.45531
116	1996	0.712192	102	0.417757	0.728445	120	0.473557
116	1997	0.712192	102	0.417675	0.728964	119	0.459222
116	1998	0.712192	102	0.416823	0.727453	121	0.46196
116	1999	0.712192	102	0.419341	0.716725	129	0.443163
116	2000	0.712192	102	0.419143	0.716725	129	0.449888
116	2001	0.712192	102	0.420219	0.716324	130	0.445336
116	2002	0.712192	102	0.421202	0.716324	130	0.445799
116	2003	0.712192	102	0.42156	0.716725	129	0.444031
116	2004	0.712192	102	0.421174	0.716725	129	0.445715
116	2005	0.712192	102	0.421149	0.716725	129	0.433076
116	2006	0.712192	102	0.421451	0.716725	129	0.42936
116	2007	0.712192	102	0.420228	0.716725	129	0.425336
116	2008	0.712192	102	0.420523	0.727453	121	0.455735
116	2009	0.712192	102	0.421363	0.727453	121	0.454099
116	2010	0.712192	102	0.421284	0.727453	121	0.456075
117	1992	0.696693	151	0.441309	0.748075	246	0.413374
117	1993	0.697963	147	0.440776	0.74713	244	0.413304
117	1994	0.698462	146	0.438729	0.750933	248	0.415586
117	1995	0.698462	146	0.438323	0.748595	245	0.41423
117	1996	0.699482	145	0.432574	0.740621	239	0.429506
117	1997	0.699482	145	0.434273	0.73966	241	0.433061
117	1998	0.699482	145	0.431503	0.74005	235	0.424076
117	1999	0.699482	145	0.431568	0.739711	236	0.43603
117	2000	0.700009	144	0.431382	0.737322	242	0.437061
117	2001	0.700009	144	0.431747	0.7387	243	0.4337
117	2002	0.700009	144	0.433412	0.737506	255	0.420959
117	2003	0.700009	144	0.432209	0.731039	265	0.414132
117	2004	0.697557	143	0.432744	0.732495	264	0.420115
117	2005	0.704051	145	0.439137	0.733486	262	0.41905
117	2006	0.704051	145	0.439386	0.735653	257	0.431794
117	2007	0.704051	145	0.43876	0.733469	257	0.416419
117	2008	0.704051	145	0.438154	0.745193	265	0.411528
117	2009	0.704051	145	0.439797	0.745193	265	0.41416
117	2010	0.704051	145	0.442451	0.742962	269	0.409861
118	1992	0.680356	89	0.366485	0.733252	209	0.439708
118	1993	0.680356	89	0.372573	0.729112	220	0.416543
118	1994	0.680356	89	0.374746	0.730303	222	0.419284
118	1995	0.680356	89	0.377767	0.730303	222	0.419175
118	1996	0.680356	89	0.374602	0.727028	220	0.420242
118	1997	0.680356	89	0.383942	0.728543	221	0.421973
118	1998	0.680356	89	0.3903	0.728543	221	0.421739
118	1999	0.680356	89	0.380807	0.727028	220	0.407194
118	2000	0.680356	89	0.379062	0.736447	225	0.450679
118	2001	0.680356	89	0.378346	0.720455	187	0.484268
118	2002	0.680356	89	0.378044	0.725951	221	0.411938
118	2003	0.680356	89	0.3802	0.725951	221	0.406848
118	2004	0.680356	89	0.382191	0.725951	221	0.414677
118	2005	0.680356	89	0.384149	0.743526	230	0.403267
118	2006	0.680356	89	0.38428	0.740041	228	0.406217
118	2007	0.680356	89	0.384081	0.743118	231	0.403127
118	2008	0.680356	89	0.387158	0.743118	231	0.396536
118	2009	0.680356	89	0.388046	0.74193	230	0.398682
118	2010	0.680356	89	0.392938	0.743118	231	0.402686
119	1992	0.677778	76	0.411676	0.702242	123	0.409223
119	1993	0.677778	76	0.425336	0.729241	225	0.373505
119	1994	0.677778	76	0.417002	0.737271	219	0.387422
119	1995	0.677778	76	0.419812	0.737229	216	0.38578
119	1996	0.677778	76	0.41995	0.735458	220	0.386319
119	1997	0.666599	86	0.42746	0.731244	228	0.393617
119	1998	0.66857	85	0.426304	0.73541	239	0.384558
119	1999	0.678186	91	0.416891	0.728379	237	0.384908
119	2000	0.678186	91	0.426829	0.727117	239	0.397968
119	2001	0.678186	91	0.434475	0.724567	246	0.398649
119	2002	0.678186	91	0.425921	0.722133	241	0.398687
119	2003	0.67696	92	0.430222	0.72169	242	0.404229
119	2004	0.675762	94	0.435481	0.722813	250	0.408446
119	2005	0.675762	94	0.441414	0.727023	244	0.42055
119	2006	0.670532	109	0.389283	0.723388	249	0.412863
119	2007	0.668576	111	0.394568	0.73657	258	0.402327
119	2008	0.6695	110	0.365167	0.737678	266	0.388984
119	2009	0.6695	110	0.365145	0.741549	266	0.394869
119	2010	0.6695	110	0.362879	0.741275	270	0.394443
120	1992	0.671121	94	0.38211	0.699003	102	0.385566
120	1993	0.671121	94	0.383699	0.700951	99	0.386068
120	1994	0.671121	94	0.384477	0.717769	131	0.353487
120	1995	0.671121	94	0.379566	0.714224	137	0.34333
120	1996	0.671121	94	0.379165	0.713849	138	0.355158
120	1997	0.671121	94	0.381153	0.708029	127	0.386913
120	1998	0.671121	94	0.383528	0.710903	135	0.352994
120	1999	0.671121	94	0.388677	0.713523	138	0.362633
120	2000	0.671121	94	0.390154	0.701536	131	0.37134
120	2001	0.671121	94	0.395133	0.701536	131	0.374938
120	2002	0.671121	94	0.394375	0.701212	132	0.374525
120	2003	0.671121	94	0.396601	0.709576	138	0.380641
120	2004	0.671121	94	0.394269	0.698155	129	0.387341
120	2005	0.671121	94	0.39546	0.701361	131	0.398096
120	2006	0.671121	94	0.392851	0.70881	152	0.35944
120	2007	0.671121	94	0.391381	0.704903	152	0.358098
120	2008	0.671121	94	0.391751	0.704903	152	0.357381
120	2009	0.671121	94	0.394075	0.704903	152	0.367062
120	2010	0.671121	94	0.393602	0.704903	152	0.3672
121	1992	0.665618	140	0.490718	0.707739	177	0.508359
121	1993	0.665618	140	0.491256	0.707739	177	0.505756
121	1994	0.665618	140	0.490304	0.720649	203	0.456189
121	1995	0.665618	140	0.49004	0.720649	203	0.462019
121	1996	0.665618	140	0.490825	0.720649	203	0.464053
121	1997	0.667769	138	0.486717	0.738496	228	0.45548
121	1998	0.671033	140	0.495461	0.732609	230	0.453779
121	1999	0.671033	140	0.49576	0.739187	231	0.453979
121	2000	0.671346	139	0.496691	0.736505	231	0.462035
121	2001	0.667482	138	0.495225	0.734456	232	0.460156
121	2002	0.667596	138	0.489719	0.748156	246	0.43739
121	2003	0.667596	138	0.487941	0.745289	243	0.449935
121	2004	0.667596	138	0.488374	0.72916	254	0.42869
121	2005	0.676916	131	0.504673	0.731948	256	0.427335
121	2006	0.667596	138	0.488615	0.733153	248	0.425896
121	2007	0.667596	138	0.487343	0.733239	246	0.423765
121	2008	0.667596	138	0.487359	0.734972	245	0.428235
121	2009	0.667596	138	0.492278	0.732557	250	0.429375
121	2010	0.667596	138	0.492589	0.733922	247	0.434337
122	1992	0.676513	54	0.275601	0.731508	108	0.396688
122	1993	0.676513	54	0.269502	0.732237	107	0.396918
122	1994	0.676513	54	0.270675	0.734199	105	0.395314
122	1995	0.676513	54	0.284875	0.734968	104	0.398983
122	1996	0.676513	54	0.275326	0.731508	108	0.399083
122	1997	0.676513	54	0.281927	0.731508	108	0.403334
122	1998	0.676513	54	0.277971	0.731508	108	0.403255
122	1999	0.676513	54	0.27436	0.727527	104	0.420841
122	2000	0.676513	54	0.277741	0.727527	104	0.424983
122	2001	0.676513	54	0.274921	0.727527	104	0.419862
122	2002	0.676513	54	0.279577	0.727527	104	0.41703
122	2003	0.676513	54	0.2822	0.72805	103	0.418783
122	2004	0.676513	54	0.283607	0.72805	103	0.413409
122	2005	0.676513	54	0.278403	0.72805	103	0.410721
122	2006	0.676513	54	0.269213	0.728831	102	0.41054
122	2007	0.676513	54	0.286214	0.728831	102	0.41896
122	2008	0.676513	54	0.280093	0.728831	102	0.416637
122	2009	0.676513	54	0.278387	0.728831	102	0.417502
122	2010	0.676513	54	0.281433	0.728831	102	0.416383
123	1992	0.725603	92	0.26805	0.749981	137	0.273262
123	1993	0.725603	92	0.267976	0.742106	137	0.28217
123	1994	0.725603	92	0.269137	0.751386	143	0.274961
123	1995	0.725603	92	0.27134	0.750829	144	0.280504
123	1996	0.725603	92	0.272344	0.750829	144	0.281839
123	1997	0.725603	92	0.269741	0.7516	143	0.283454
123	1998	0.725603	92	0.270635	0.752155	142	0.278128
123	1999	0.725603	92	0.270982	0.750829	144	0.281769
123	2000	0.725603	92	0.271216	0.750829	144	0.282495
123	2001	0.725603	92	0.270174	0.750829	144	0.282026
123	2002	0.725603	92	0.27035	0.7516	143	0.282283
123	2003	0.725603	92	0.270232	0.750829	144	0.286054
123	2004	0.725603	92	0.270529	0.750829	144	0.299167
123	2005	0.725603	92	0.271482	0.749822	146	0.302179
123	2006	0.725603	92	0.26939	0.750348	145	0.302721
123	2007	0.725603	92	0.269265	0.750348	145	0.301449
123	2008	0.725603	92	0.269666	0.750348	145	0.297653
123	2009	0.725603	92	0.26789	0.750348	145	0.297501
123	2010	0.725603	92	0.267681	0.760546	166	0.27333
124	1992	0.696027	99	0.432993	0.75175	218	0.355345
124	1993	0.696027	99	0.433803	0.75175	218	0.342706
124	1994	0.696027	99	0.434277	0.748349	216	0.346684
124	1995	0.696027	99	0.434416	0.750425	221	0.338252
124	1996	0.696027	99	0.435244	0.752533	213	0.347765
124	1997	0.696027	99	0.436416	0.742487	206	0.348309
124	1998	0.696027	99	0.436767	0.737724	218	0.339467
124	1999	0.696027	99	0.436741	0.735127	213	0.342391
124	2000	0.696027	99	0.435168	0.732363	204	0.347642
124	2001	0.696027	99	0.43389	0.726218	215	0.374229
124	2002	0.696027	99	0.435869	0.726865	197	0.402481
124	2003	0.696027	99	0.436419	0.726763	215	0.38122
124	2004	0.696027	99	0.438002	0.732111	214	0.399803
124	2005	0.696027	99	0.438412	0.735577	222	0.387026
124	2006	0.696027	99	0.439519	0.7339	222	0.380013
124	2007	0.696027	99	0.439869	0.735251	223	0.38158
124	2008	0.696027	99	0.43962	0.735251	223	0.375717
124	2009	0.696027	99	0.438354	0.735251	223	0.379618
124	2010	0.696027	99	0.439261	0.747576	231	0.371684
125	1992	0	1	0	0	1	0
125	1993	0	1	0	0	1	0
125	1994	0	1	0	0	1	0
125	1995	0	1	0	0	1	0
125	1996	0	1	0	0	1	0
125	1997	0	1	0	0	1	0
125	1998	0	1	0	0	1	0
125	1999	0	1	0	0	1	0
125	2000	0	1	0	0	1	0
125	2001	0	1	0	0	1	0
125	2002	0	1	0	0	1	0
125	2003	0	1	0	0	1	0
125	2004	0	1	0	0	1	0
125	2005	0	1	0	0	1	0
125	2006	0	1	0	0	1	0
125	2007	0	1	0	0	1	0
125	2008	0	1	0	0	1	0
125	2009	0	1	0	0	1	0
125	2010	0	1	0	0	1	0
126	1992	0.639503	67	0.433061	0.681391	121	0.427292
126	1993	0.647873	69	0.45624	0.684919	129	0.436244
126	1994	0.647873	69	0.456333	0.724683	210	0.372225
126	1995	0.647873	69	0.458526	0.736041	222	0.367472
126	1996	0.647873	69	0.464398	0.73326	224	0.382939
126	1997	0.647873	69	0.468194	0.730816	230	0.382311
126	1998	0.647873	69	0.460293	0.721716	218	0.402646
126	1999	0.644099	74	0.462527	0.72628	229	0.393431
[truncated: 2,061 more rows]
