# Supplementary material for: Commercial Plant Production and Consumption Still Follow the Latitudinal Gradient in Species Diversity despite Economic Globalization
Source: PLoS One. 2016 Oct 5;11(10):e0163002. doi: 10.1371/journal.pone.0163002 (PMC5051709; doi:10.1371/journal.pone.0163002)
Supplement: S20 File — (XLSX) [file pone.0163002.s023.xlsx]

## Sheet: PD_FAO_outputAltFive_2014-05-28
country	year	PSVP	SRP	EP	PSVC	SRC	EC
1	1992	0.669637	94	0.353802	0.662394	111	0.372992
1	1993	0.669774	93	0.340602	0.673628	112	0.368821
1	1994	0.669774	93	0.349057	0.670719	117	0.388156
1	1995	0.669774	93	0.348168	0.682592	151	0.399335
1	1996	0.666226	95	0.355763	0.715436	172	0.37458
1	1997	0.666226	95	0.357729	0.697757	150	0.418684
1	1998	0.666226	95	0.361768	0.681583	141	0.433263
1	1999	0.666226	95	0.360409	0.719267	166	0.402226
1	2000	0.666226	95	0.362345	0.720501	169	0.39717
1	2001	0.666226	95	0.363337	0.717971	174	0.378588
1	2002	0.666226	95	0.362163	0.720967	177	0.370276
1	2003	0.663291	107	0.349433	0.73132	195	0.367319
1	2004	0.663291	107	0.355001	0.732077	195	0.3812
1	2005	0.663291	107	0.354349	0.729648	215	0.357505
1	2006	0.663291	107	0.351128	0.723547	217	0.359715
1	2007	0.658982	112	0.376409	0.720256	212	0.380613
1	2008	0.658982	112	0.375174	0.737747	219	0.358425
1	2009	0.658982	112	0.374094	0.726012	204	0.377223
1	2010	0.658982	112	0.373608	0.743784	219	0.377599
2	1992	0.671294	113	0.359778	0.700826	124	0.387584
2	1993	0.671294	113	0.360797	0.71296	127	0.39867
2	1994	0.671294	113	0.361068	0.722742	135	0.393029
2	1995	0.671294	113	0.363347	0.722742	135	0.38263
2	1996	0.671294	113	0.365032	0.704506	130	0.382028
2	1997	0.671294	113	0.364497	0.705697	134	0.390291
2	1998	0.671294	113	0.365396	0.704288	129	0.378825
2	1999	0.671294	113	0.366014	0.705697	134	0.381876
2	2000	0.671294	113	0.367522	0.696408	128	0.399498
2	2001	0.671294	113	0.36653	0.693707	124	0.407883
2	2002	0.671294	113	0.364593	0.712067	138	0.37496
2	2003	0.671294	113	0.368696	0.720804	143	0.370843
2	2004	0.671294	113	0.370034	0.710823	140	0.373305
2	2005	0.671294	113	0.36829	0.711158	140	0.379036
2	2006	0.671294	113	0.366125	0.711158	140	0.379903
2	2007	0.671294	113	0.365285	0.711158	140	0.371607
2	2008	0.671294	113	0.364928	0.711158	140	0.384232
2	2009	0.671294	113	0.363161	0.693756	125	0.393045
2	2010	0.671294	113	0.364271	0.689633	124	0.378641
3	1992	0.674106	116	0.457333	0.684658	124	0.47032
3	1993	0.669872	115	0.454184	0.688266	128	0.467473
3	1994	0.665383	114	0.454167	0.688134	129	0.484891
3	1995	0.664076	115	0.458361	0.686919	130	0.489069
3	1996	0.676281	103	0.518029	0.715095	223	0.38339
3	1997	0.675848	123	0.452245	0.70788	215	0.383209
3	1998	0.676281	103	0.523051	0.703012	152	0.480824
3	1999	0.676281	103	0.523711	0.735753	241	0.378827
3	2000	0.676281	103	0.525713	0.734787	243	0.362482
3	2001	0.676281	103	0.526639	0.72277	242	0.38175
3	2002	0.675848	123	0.456197	0.725465	230	0.399732
3	2003	0.675093	124	0.457227	0.742185	234	0.395013
3	2004	0.677994	129	0.465396	0.73017	222	0.42176
3	2005	0.677994	129	0.467461	0.729356	228	0.408828
3	2006	0.675507	133	0.478525	0.713145	224	0.405281
3	2007	0.675507	133	0.480536	0.706537	228	0.403303
3	2008	0.675507	133	0.483312	0.724571	236	0.398335
3	2009	0.675507	133	0.483723	0.729969	216	0.427703
3	2010	0.675507	133	0.482853	0.709911	223	0.415565
4	1992	0.660031	118	0.471277	0.703874	204	0.393189
4	1993	0.660031	118	0.474891	0.736439	185	0.407877
4	1994	0.655592	117	0.471602	0.730593	201	0.398281
4	1995	0.660031	118	0.47094	0.736412	233	0.36695
4	1996	0.65756	120	0.47441	0.736869	211	0.403019
4	1997	0.65756	120	0.477902	0.736399	200	0.412004
4	1998	0.65756	120	0.476331	0.728553	195	0.418872
4	1999	0.65756	120	0.473503	0.722054	221	0.367332
4	2000	0.65756	120	0.47754	0.736132	207	0.396662
4	2001	0.65756	120	0.472855	0.729361	227	0.381341
4	2002	0.653188	119	0.474712	0.748408	248	0.367602
4	2003	0.653188	119	0.471506	0.745401	256	0.360944
4	2004	0.663222	121	0.472739	0.728963	238	0.382673
4	2005	0.663222	121	0.473256	0.727386	237	0.376531
4	2006	0.663222	121	0.473062	0.725444	229	0.393199
4	2007	0.663222	121	0.474	0.742838	250	0.375249
4	2008	0.663222	121	0.474073	0.748919	247	0.373761
4	2009	0.663222	121	0.472064	0.748106	251	0.375305
4	2010	0.663222	121	0.474408	0.744721	250	0.377205
5	1992	0.758104	57	0.274364	0.768822	79	0.421276
5	1993	0.758104	57	0.275041	0.771013	77	0.414613
5	1994	0.756647	58	0.27576	0.771013	77	0.417688
5	1995	0.756647	58	0.273941	0.771013	77	0.410687
5	1996	0.756647	58	0.27228	0.771013	77	0.420598
5	1997	0.756647	58	0.272377	0.771013	77	0.426484
5	1998	0.760654	56	0.369612	0.755277	94	0.413733
5	1999	0.760654	56	0.385922	0.755277	94	0.415003
5	2000	0.760654	56	0.390824	0.755277	94	0.418195
5	2001	0.760654	56	0.392666	0.755277	94	0.408314
5	2002	0.760654	56	0.393428	0.749617	104	0.36866
5	2003	0.763802	41	0.475698	0.749617	104	0.333017
5	2004	0.763802	41	0.471456	0.749617	104	0.334886
5	2005	0.763802	41	0.465618	0.754229	100	0.327628
5	2006	0.749481	62	0.347562	0.752451	101	0.340882
5	2007	0.749481	62	0.349667	0.754229	100	0.334165
5	2008	0.749481	62	0.349364	0.754229	100	0.349669
5	2009	0.749481	62	0.346197	0.754229	100	0.34371
5	2010	0.749481	62	0.347659	0.754229	100	0.351531
7	1992	0.728723	96	0.341077	0.748907	112	0.382838
7	1993	0.728723	96	0.340811	0.749899	113	0.392336
7	1994	0.728723	96	0.340718	0.749899	113	0.39325
7	1995	0.728723	96	0.341645	0.748907	112	0.388067
7	1996	0.728723	96	0.340243	0.751838	110	0.389426
7	1997	0.728723	96	0.340371	0.749899	113	0.391779
7	1998	0.728723	96	0.342072	0.749899	113	0.395458
7	1999	0.728723	96	0.338772	0.748907	112	0.383865
7	2000	0.728723	96	0.341085	0.748907	112	0.391216
7	2001	0.728723	96	0.34432	0.748907	112	0.393289
7	2002	0.728723	96	0.342979	0.766327	164	0.340972
7	2003	0.728723	96	0.341692	0.752324	159	0.337736
7	2004	0.728723	96	0.342291	0.732511	163	0.337766
7	2005	0.728723	96	0.343	0.727505	180	0.303332
7	2006	0.728723	96	0.34363	0.736218	185	0.29221
7	2007	0.728723	96	0.343905	0.751734	191	0.286428
7	2008	0.728723	96	0.341935	0.751734	191	0.284834
7	2009	0.728723	96	0.343662	0.751734	191	0.28982
7	2010	0.728723	96	0.346671	0.750952	189	0.286643
8	1992	0.707962	85	0.394979	0.723433	148	0.378172
8	1993	0.707962	85	0.39818	0.72534	141	0.395751
8	1994	0.707962	85	0.399864	0.722799	149	0.37954
8	1995	0.707962	85	0.397445	0.722233	140	0.396507
8	1996	0.707962	85	0.401909	0.722799	149	0.369105
8	1997	0.707962	85	0.40144	0.726199	150	0.369509
8	1998	0.707962	85	0.398514	0.736394	136	0.414492
8	1999	0.707962	85	0.402298	0.734457	147	0.404531
8	2000	0.707962	85	0.391637	0.730439	147	0.414727
8	2001	0.707962	85	0.400429	0.724808	140	0.434882
8	2002	0.707962	85	0.397983	0.734457	147	0.402873
8	2003	0.707962	85	0.397373	0.737661	139	0.422932
8	2004	0.707962	85	0.397548	0.734457	147	0.415232
8	2005	0.707962	85	0.394343	0.738592	233	0.38712
8	2006	0.707962	85	0.393295	0.73689	195	0.376766
8	2007	0.707962	85	0.394475	0.752289	195	0.39151
8	2008	0.707962	85	0.392431	0.752289	195	0.383901
8	2009	0.707962	85	0.392801	0.750461	194	0.379628
8	2010	0.707962	85	0.397075	0.734885	184	0.390035
9	1992	0.73803	143	0.544624	0.744506	241	0.419222
9	1993	0.73803	143	0.546277	0.741631	240	0.430111
9	1994	0.73803	143	0.543258	0.736302	237	0.435337
9	1995	0.73803	143	0.541235	0.741355	230	0.44537
9	1996	0.73803	143	0.539057	0.743785	233	0.436283
9	1997	0.73803	143	0.542565	0.739246	235	0.438278
9	1998	0.73803	143	0.541877	0.743449	239	0.43268
9	1999	0.73803	143	0.543875	0.736104	242	0.441122
9	2000	0.73803	143	0.545979	0.744112	232	0.450105
9	2001	0.73803	143	0.547375	0.73927	246	0.426166
9	2002	0.73803	143	0.549401	0.741325	230	0.427998
9	2003	0.73803	143	0.549341	0.742849	226	0.44027
9	2004	0.73803	143	0.544733	0.739558	224	0.440551
9	2005	0.73803	143	0.544083	0.742594	227	0.438374
9	2006	0.73803	143	0.544164	0.744422	222	0.453739
9	2007	0.73803	143	0.543631	0.750587	214	0.464158
9	2008	0.73803	143	0.54329	0.746304	219	0.44409
9	2009	0.73803	143	0.544332	0.753747	220	0.444617
9	2010	0.73803	143	0.54049	0.742529	227	0.440392
10	1992	0.692472	166	0.477247	0.750113	280	0.405382
10	1993	0.692472	166	0.480659	0.737934	269	0.418444
10	1994	0.6961	161	0.483242	0.740404	272	0.418633
10	1995	0.6961	161	0.480238	0.724058	262	0.425767
10	1996	0.6961	161	0.480216	0.741262	270	0.411044
10	1997	0.6961	161	0.480103	0.739216	271	0.408596
10	1998	0.6961	161	0.481794	0.727819	263	0.423544
10	1999	0.6961	161	0.481206	0.724077	262	0.426513
10	2000	0.6961	161	0.48122	0.724886	260	0.423737
10	2001	0.6961	161	0.481396	0.725709	263	0.423334
10	2002	0.6961	161	0.484614	0.736329	269	0.418623
10	2003	0.6961	161	0.483132	0.738338	268	0.423969
10	2004	0.6961	161	0.486221	0.730357	261	0.441309
10	2005	0.6961	161	0.483545	0.745066	274	0.41676
10	2006	0.6961	161	0.486617	0.753206	277	0.420967
10	2007	0.6961	161	0.488112	0.741625	269	0.423708
10	2008	0.6961	161	0.491853	0.746363	266	0.42986
10	2009	0.6961	161	0.488609	0.746807	265	0.428501
10	2010	0.6961	161	0.487405	0.746363	266	0.431543
11	1992	0.664682	92	0.478107	0.751171	279	0.399567
11	1993	0.664682	92	0.478764	0.735164	273	0.40209
11	1994	0.664682	92	0.480942	0.737448	272	0.40488
11	1995	0.675746	95	0.500934	0.741674	275	0.414108
11	1996	0.707666	105	0.481513	0.756606	285	0.413389
11	1997	0.707666	105	0.481091	0.74158	279	0.4206
11	1998	0.706435	107	0.48265	0.740228	278	0.41729
11	1999	0.706435	107	0.485561	0.757461	291	0.409591
11	2000	0.706435	107	0.490483	0.755193	289	0.413493
11	2001	0.706435	107	0.483724	0.755193	289	0.417612
11	2002	0.706435	107	0.487768	0.756344	290	0.420093
11	2003	0.695309	127	0.477582	0.756679	288	0.43841
11	2004	0.695309	127	0.475338	0.756679	288	0.441401
11	2005	0.695309	127	0.475678	0.755292	292	0.435211
11	2006	0.695309	127	0.475419	0.756411	293	0.433618
11	2007	0.695309	127	0.476283	0.756346	289	0.434519
11	2008	0.695738	126	0.470507	0.756346	289	0.434613
11	2009	0.695738	126	0.467377	0.756346	289	0.436842
11	2010	0.698207	127	0.473949	0.756346	289	0.433234
12	1992	0.680661	51	0.346981	0.742916	188	0.344752
12	1993	0.680661	51	0.348587	0.740348	183	0.348408
12	1994	0.680661	51	0.352182	0.728121	181	0.369581
12	1995	0.680661	51	0.355329	0.717582	172	0.366405
12	1996	0.680661	51	0.352239	0.717582	172	0.361497
12	1997	0.680661	51	0.35599	0.751901	230	0.390119
12	1998	0.680661	51	0.353992	0.755321	215	0.391368
12	1999	0.680661	51	0.354123	0.753729	214	0.376138
12	2000	0.680661	51	0.351415	0.720899	248	0.403696
12	2001	0.680661	51	0.35118	0.733859	247	0.402447
12	2002	0.680661	51	0.353027	0.7128	191	0.387306
12	2003	0.680661	51	0.354467	0.706182	183	0.369234
12	2004	0.680661	51	0.354614	0.708636	192	0.367999
12	2005	0.680661	51	0.353981	0.733239	249	0.387514
12	2006	0.680661	51	0.353194	0.72243	243	0.398804
12	2007	0.680661	51	0.353203	0.733609	248	0.385987
12	2008	0.680661	51	0.354794	0.735784	247	0.392336
12	2009	0.680661	51	0.355233	0.735485	249	0.399052
12	2010	0.680661	51	0.357711	0.726109	240	0.403967
13	1992	0.625768	89	0.325626	0.723805	178	0.382133
13	1993	0.625768	89	0.322831	0.723805	178	0.378051
13	1994	0.625768	89	0.323768	0.723805	178	0.384806
13	1995	0.625768	89	0.320701	0.723805	178	0.375042
13	1996	0.625859	88	0.310154	0.724379	177	0.363849
13	1997	0.625859	88	0.307412	0.722702	179	0.408852
13	1998	0.624375	89	0.316034	0.721772	169	0.377491
13	1999	0.624375	89	0.317346	0.725318	173	0.382762
13	2000	0.624375	89	0.322466	0.747334	219	0.42688
13	2001	0.624375	89	0.318298	0.751663	228	0.422982
13	2002	0.624375	89	0.320974	0.758991	233	0.410678
13	2003	0.624375	89	0.314262	0.755577	242	0.409766
13	2004	0.624375	89	0.322777	0.755532	233	0.425691
13	2005	0.624644	90	0.330649	0.755891	241	0.427098
13	2006	0.624644	90	0.328522	0.753132	229	0.41015
13	2007	0.624644	90	0.327127	0.752242	243	0.410043
13	2008	0.624644	90	0.328537	0.752242	243	0.417772
13	2009	0.624644	90	0.328725	0.753407	247	0.403314
13	2010	0.624644	90	0.331531	0.7545	244	0.412245
14	1992	0.704239	102	0.282226	0.747649	224	0.356618
14	1993	0.701749	105	0.30443	0.765094	245	0.337153
14	1994	0.701749	105	0.300183	0.763063	243	0.345723
14	1995	0.701749	105	0.302394	0.765239	245	0.340672
14	1996	0.701749	105	0.299162	0.753909	240	0.354332
14	1997	0.701749	105	0.299776	0.7512	241	0.355028
14	1998	0.701749	105	0.318195	0.754407	234	0.341485
14	1999	0.701749	105	0.314056	0.756683	245	0.353198
14	2000	0.701749	105	0.316307	0.740258	229	0.368098
14	2001	0.701749	105	0.318403	0.75321	239	0.404403
14	2002	0.701749	105	0.313839	0.752269	241	0.396544
14	2003	0.701749	105	0.321098	0.751331	240	0.405522
14	2004	0.701749	105	0.31741	0.751736	239	0.382
14	2005	0.701749	105	0.316363	0.748826	250	0.390811
14	2006	0.701749	105	0.316437	0.752648	254	0.373216
14	2007	0.701749	105	0.313244	0.752101	256	0.374547
14	2008	0.701749	105	0.313102	0.751767	248	0.38081
14	2009	0.701749	105	0.318858	0.750521	251	0.380688
14	2010	0.701749	105	0.320509	0.749766	251	0.381094
15	1992	0.67705	90	0.49678	0.754201	284	0.403448
15	1993	0.67705	90	0.499673	0.754442	279	0.401298
15	1994	0.67705	90	0.49331	0.756532	286	0.40325
15	1995	0.67705	90	0.493893	0.75681	281	0.405869
15	1996	0.67705	90	0.49266	0.755365	285	0.398429
15	1997	0.67705	90	0.486758	0.755365	285	0.399088
15	1998	0.67705	90	0.489455	0.756532	286	0.401718
15	1999	0.67705	90	0.488091	0.756833	285	0.404858
16	1992	0.72406	176	0.403487	0.740616	230	0.389741
16	1993	0.72406	176	0.401805	0.741487	230	0.382199
16	1994	0.72406	176	0.406892	0.731368	234	0.384716
16	1995	0.72406	176	0.404326	0.75114	252	0.372531
16	1996	0.72406	176	0.405609	0.730265	239	0.381493
16	1997	0.72406	176	0.406357	0.727955	237	0.376743
16	1998	0.72406	176	0.407469	0.730392	236	0.387574
16	1999	0.72406	176	0.406641	0.731161	223	0.388141
16	2000	0.72406	176	0.406524	0.728309	225	0.386728
16	2001	0.72406	176	0.406124	0.7284	226	0.391966
16	2002	0.72406	176	0.406163	0.74851	257	0.383378
16	2003	0.72406	176	0.406155	0.749533	253	0.393842
16	2004	0.72406	176	0.405936	0.728392	240	0.398015
16	2005	0.722948	177	0.411349	0.750708	256	0.372344
16	2006	0.722948	177	0.413256	0.734433	243	0.392984
16	2007	0.722948	177	0.413722	0.735679	242	0.391341
16	2008	0.722948	177	0.411245	0.737392	238	0.401628
16	2009	0.722948	177	0.411667	0.736975	239	0.397448
16	2010	0.722948	177	0.410854	0.733751	236	0.396668
17	1992	0.616385	40	0.317238	0.682063	95	0.396672
17	1993	0.616385	40	0.324166	0.682063	95	0.395581
17	1994	0.616385	40	0.32818	0.682063	95	0.386318
17	1995	0.616385	40	0.329403	0.682063	95	0.385238
17	1996	0.616385	40	0.332862	0.682063	95	0.373481
17	1997	0.616385	40	0.332459	0.682063	95	0.37251
17	1998	0.616385	40	0.323464	0.682063	95	0.375677
17	1999	0.616385	40	0.323077	0.681399	96	0.385323
17	2000	0.616385	40	0.323889	0.681399	96	0.387899
17	2001	0.616385	40	0.324286	0.681399	96	0.385943
17	2002	0.616385	40	0.327776	0.681399	96	0.380623
17	2003	0.616385	40	0.326445	0.681399	96	0.376299
17	2004	0.616385	40	0.322264	0.681399	96	0.370752
17	2005	0.616385	40	0.330001	0.681399	96	0.369174
17	2006	0.616385	40	0.328427	0.681399	96	0.37625
17	2007	0.616385	40	0.327353	0.698841	104	0.350732
17	2008	0.616385	40	0.331218	0.694133	103	0.357331
17	2009	0.616385	40	0.331032	0.694133	103	0.35794
17	2010	0.616385	40	0.33434	0.694133	103	0.365908
18	1992	0.737531	102	0.323857	0.741945	119	0.3818
18	1993	0.737531	102	0.324492	0.732415	166	0.317504
18	1994	0.737531	102	0.323398	0.730129	172	0.327768
18	1995	0.737531	102	0.322129	0.734026	165	0.312946
18	1996	0.737531	102	0.323254	0.732009	169	0.31602
18	1997	0.737531	102	0.322255	0.740214	151	0.358238
18	1998	0.737531	102	0.32276	0.739993	146	0.349542
18	1999	0.734822	106	0.354561	0.736786	150	0.376464
18	2000	0.734822	106	0.359751	0.736786	150	0.384946
18	2001	0.734822	106	0.358805	0.737707	137	0.397867
18	2002	0.734822	106	0.357423	0.740356	138	0.403001
18	2003	0.737255	118	0.394893	0.733299	145	0.431894
18	2004	0.735351	129	0.422981	0.735431	153	0.440112
18	2005	0.735351	129	0.425915	0.732067	154	0.447723
18	2006	0.735351	129	0.425371	0.736902	142	0.458106
18	2007	0.735351	129	0.424696	0.736048	144	0.464058
18	2008	0.735351	129	0.424554	0.736616	143	0.46562
18	2009	0.734836	130	0.427787	0.73614	144	0.465676
18	2010	0.734836	130	0.430176	0.729568	185	0.444597
19	1992	0.712346	147	0.466603	0.710789	193	0.410013
19	1993	0.712346	147	0.466722	0.708969	202	0.399308
19	1994	0.712346	147	0.466424	0.732085	223	0.364889
19	1995	0.712346	147	0.466665	0.725765	222	0.361264
19	1996	0.712346	147	0.465551	0.730696	226	0.364901
19	1997	0.712346	147	0.468596	0.71239	197	0.416375
19	1998	0.712346	147	0.469495	0.710155	202	0.406424
19	1999	0.712346	147	0.468846	0.708641	201	0.413886
19	2000	0.712346	147	0.468981	0.742382	250	0.354729
19	2001	0.712346	147	0.466832	0.747323	243	0.356318
19	2002	0.712346	147	0.46776	0.753055	247	0.352704
19	2003	0.712346	147	0.46615	0.737744	237	0.362922
19	2004	0.712346	147	0.462683	0.73059	224	0.376238
19	2005	0.712346	147	0.461871	0.71169	212	0.400036
19	2006	0.712346	147	0.458958	0.712199	225	0.37398
19	2007	0.712346	147	0.459588	0.737808	222	0.382894
19	2008	0.712346	147	0.459829	0.730813	218	0.392138
19	2009	0.712346	147	0.459011	0.724892	235	0.35278
19	2010	0.712346	147	0.460638	0.748083	221	0.389151
20	1992	0.705869	85	0.287811	0.749289	254	0.364809
20	1993	0.705869	85	0.29181	0.746259	247	0.372788
20	1994	0.705869	85	0.291025	0.750846	249	0.376088
20	1995	0.705869	85	0.284885	0.752315	246	0.370733
20	1996	0.705869	85	0.281267	0.733875	241	0.372285
20	1997	0.705869	85	0.279522	0.757676	266	0.362288
20	1998	0.705869	85	0.279772	0.750024	252	0.386882
20	1999	0.705869	85	0.280017	0.748937	257	0.383602
20	2000	0.705869	85	0.27462	0.749503	256	0.38808
20	2001	0.705869	85	0.263412	0.73267	246	0.40824
20	2002	0.705869	85	0.268153	0.749007	261	0.421252
20	2003	0.705869	85	0.271063	0.735097	230	0.441579
20	2004	0.705869	85	0.271525	0.72786	213	0.435537
20	2005	0.705869	85	0.268328	0.726325	218	0.412163
20	2006	0.705869	85	0.271534	0.724106	216	0.413128
20	2007	0.705869	85	0.268941	0.74144	231	0.406232
20	2008	0.705869	85	0.269239	0.759133	238	0.399565
20	2009	0.695861	82	0.266408	0.747632	240	0.396792
20	2010	0.695861	82	0.280097	0.759784	239	0.394429
21	1992	0.742485	171	0.440921	0.756242	260	0.37664
21	1993	0.742485	171	0.443124	0.755084	266	0.378218
21	1994	0.742485	171	0.439049	0.753357	278	0.368941
21	1995	0.742485	171	0.436857	0.754474	286	0.373107
21	1996	0.742485	171	0.438867	0.755913	286	0.378868
21	1997	0.742485	171	0.439427	0.754663	286	0.374394
21	1998	0.742485	171	0.439081	0.754663	286	0.378422
21	1999	0.742485	171	0.435262	0.751194	271	0.384174
21	2000	0.742485	171	0.435489	0.753997	265	0.394756
21	2001	0.742485	171	0.434991	0.757073	261	0.395228
21	2002	0.742485	171	0.435059	0.754772	266	0.393662
21	2003	0.742485	171	0.43548	0.750712	268	0.391882
21	2004	0.742485	171	0.434266	0.751913	274	0.385346
21	2005	0.744122	172	0.439099	0.75086	269	0.389469
21	2006	0.744122	172	0.438441	0.752823	274	0.391269
21	2007	0.744122	172	0.436718	0.749651	268	0.385902
21	2008	0.744122	172	0.434516	0.749651	268	0.382286
21	2009	0.744122	172	0.434619	0.754099	266	0.389858
21	2010	0.744122	172	0.437655	0.749651	268	0.395198
22	1992	0	0	0	0.718105	150	0.343927
22	1993	0	0	0	0.713269	158	0.327001
22	1994	0	0	0	0.711067	151	0.34006
22	1995	0	0	0	0.701598	146	0.339057
22	1996	0	0	0	0.712101	148	0.320733
22	1997	0	0	0	0.723608	139	0.339599
22	1998	0	0	0	0.725615	140	0.332627
22	1999	0	0	0	0.720685	107	0.373566
22	2000	0	0	0	0.726342	106	0.370281
22	2001	0	0	0	0.716518	99	0.397216
22	2002	0	0	0	0.717366	99	0.396232
22	2003	0	0	0	0.720735	96	0.391716
22	2004	0	0	0	0.691604	77	0.379664
22	2005	0	0	0	0.690894	78	0.372326
22	2006	0	0	0	0.702462	88	0.349979
22	2007	0	0	0	0.702118	89	0.352393
22	2008	0	0	0	0.702996	88	0.356275
22	2009	0	0	0	0.745411	214	0.38272
22	2010	0	0	0	0.748164	221	0.383436
23	1992	0.737427	94	0.385019	0.760567	165	0.409876
23	1993	0.735738	95	0.391699	0.747386	186	0.356993
23	1994	0.735738	95	0.370946	0.755064	190	0.345611
23	1995	0.746112	99	0.371722	0.763018	174	0.383007
23	1996	0.746112	99	0.366212	0.753442	187	0.346844
23	1997	0.746112	99	0.360035	0.76098	179	0.366441
23	1998	0.743112	102	0.364261	0.754189	164	0.395513
23	1999	0.736587	108	0.37734	0.757144	172	0.394791
23	2000	0.736587	108	0.383897	0.758133	190	0.389127
23	2001	0.736587	108	0.389642	0.751608	155	0.408414
23	2002	0.736587	108	0.393383	0.745561	160	0.383795
23	2003	0.736587	108	0.405014	0.756421	194	0.414777
23	2004	0.736587	108	0.389797	0.738103	189	0.383029
23	2005	0.736587	108	0.393758	0.75376	207	0.368529
23	2006	0.736587	108	0.39675	0.759734	192	0.389325
23	2007	0.736587	108	0.387711	0.759623	188	0.395594
23	2008	0.736587	108	0.396259	0.769372	192	0.376938
23	2009	0.736587	108	0.392367	0.77309	185	0.387865
23	2010	0.736587	108	0.391008	0.759003	201	0.373692
25	1992	0.723581	88	0.192591	0.738307	106	0.269197
25	1993	0.723581	88	0.191113	0.738306	105	0.277115
25	1994	0.723581	88	0.192559	0.741682	106	0.288852
25	1995	0.723581	88	0.192138	0.741682	106	0.335114
25	1996	0.723581	88	0.192716	0.741682	106	0.282793
25	1997	0.723581	88	0.194321	0.741682	106	0.292546
25	1998	0.723581	88	0.195863	0.741682	106	0.285545
25	1999	0.723581	88	0.196233	0.741682	106	0.285598
25	2000	0.723581	88	0.195091	0.741682	106	0.290786
25	2001	0.723581	88	0.195448	0.741682	106	0.345747
25	2002	0.723581	88	0.196507	0.759433	152	0.268663
25	2003	0.723581	88	0.197032	0.741557	145	0.282008
25	2004	0.723581	88	0.197435	0.752229	148	0.299226
25	2005	0.723581	88	0.197117	0.742844	165	0.26922
25	2006	0.723581	88	0.196761	0.735191	170	0.280824
25	2007	0.723581	88	0.196759	0.728313	169	0.269026
25	2008	0.723581	88	0.196942	0.730467	166	0.260475
25	2009	0.723581	88	0.197216	0.730467	166	0.261739
25	2010	0.723581	88	0.196627	0.73306	143	0.292609
26	1992	0.720746	80	0.413672	0.73075	208	0.337403
26	1993	0.720746	80	0.416347	0.732472	204	0.329717
26	1994	0.720746	80	0.415453	0.731931	218	0.359428
26	1995	0.720746	80	0.418468	0.729703	217	0.349357
26	1996	0.720746	80	0.421346	0.728211	219	0.354268
26	1997	0.720746	80	0.418109	0.73592	241	0.395736
26	1998	0.720746	80	0.41744	0.73592	241	0.3917
26	1999	0.720746	80	0.422052	0.733866	225	0.3726
26	2000	0.720746	80	0.420995	0.732129	224	0.378362
26	2001	0.720746	80	0.422037	0.733866	225	0.368885
26	2002	0.720746	80	0.418285	0.733305	239	0.412657
26	2003	0.720746	80	0.417835	0.753851	251	0.394201
26	2004	0.720746	80	0.419673	0.763028	260	0.370758
26	2005	0.720746	80	0.418563	0.765418	254	0.379252
26	2006	0.720746	80	0.415571	0.763124	256	0.350423
26	2007	0.720746	80	0.402315	0.763924	258	0.356942
26	2008	0.720746	80	0.403629	0.763924	258	0.353496
26	2009	0.720746	80	0.402797	0.763924	258	0.356813
26	2010	0.720746	80	0.405672	0.765029	248	0.364239
27	1992	0.696249	146	0.452067	0.732681	214	0.4157
27	1993	0.700166	163	0.432729	0.724829	241	0.402242
27	1994	0.703774	163	0.441883	0.733969	250	0.39258
27	1995	0.702968	165	0.440985	0.732793	250	0.397137
27	1996	0.703765	163	0.440681	0.734742	225	0.422041
27	1997	0.703372	163	0.440572	0.734193	234	0.406104
27	1998	0.703765	163	0.444538	0.731463	240	0.401685
27	1999	0.703765	163	0.444869	0.735821	232	0.409566
27	2000	0.703765	163	0.447382	0.73292	234	0.416341
27	2001	0.702865	164	0.450622	0.723996	253	0.401353
27	2002	0.702865	164	0.448837	0.73431	255	0.407259
27	2003	0.702219	166	0.454911	0.733971	247	0.421756
27	2004	0.702219	166	0.452798	0.724398	239	0.439595
27	2005	0.702219	166	0.452548	0.729705	239	0.442252
27	2006	0.694275	175	0.437378	0.741111	269	0.400092
27	2007	0.694275	175	0.439073	0.739766	273	0.406085
27	2008	0.694465	174	0.424652	0.741906	267	0.410723
27	2009	0.693905	176	0.434139	0.757868	280	0.409088
27	2010	0.693905	176	0.431631	0.743848	276	0.409468
28	1992	0.736285	114	0.399594	0.740282	122	0.383354
28	1993	0.736285	114	0.399766	0.740065	123	0.381661
28	1994	0.736285	114	0.400498	0.74764	124	0.388992
28	1995	0.736285	114	0.397033	0.747369	125	0.389991
28	1996	0.736285	114	0.392651	0.78013	183	0.314404
28	1997	0.736285	114	0.394807	0.778496	174	0.324491
28	1998	0.736285	114	0.396422	0.776342	182	0.30884
28	1999	0.736285	114	0.398094	0.777718	183	0.322223
28	2000	0.736285	114	0.399432	0.781007	174	0.335927
28	2001	0.736285	114	0.400629	0.781007	174	0.334288
28	2002	0.736285	114	0.402323	0.779789	177	0.332681
28	2003	0.736285	114	0.40312	0.778852	181	0.339551
28	2004	0.736285	114	0.401715	0.781005	178	0.32821
28	2005	0.736285	114	0.400694	0.752982	155	0.361262
28	2006	0.736285	114	0.401146	0.777666	163	0.348934
28	2007	0.736285	114	0.401361	0.779019	176	0.348443
28	2008	0.736285	114	0.40007	0.779822	174	0.334255
28	2009	0.736285	114	0.396239	0.78294	172	0.329206
28	2010	0.736285	114	0.394769	0.782235	174	0.33372
29	1992	0.755583	88	0.353564	0.75733	91	0.374833
29	1993	0.755583	88	0.350864	0.755053	94	0.377125
29	1994	0.755583	88	0.354131	0.755053	94	0.397685
29	1995	0.755583	88	0.353647	0.75733	91	0.38114
29	1996	0.755583	88	0.354187	0.755053	94	0.382665
29	1997	0.755583	88	0.35439	0.757617	90	0.370692
29	1998	0.755583	88	0.352631	0.752588	122	0.301944
29	1999	0.755583	88	0.353927	0.758941	124	0.311104
29	2000	0.755583	88	0.354118	0.764165	127	0.313341
29	2001	0.755583	88	0.356687	0.765865	131	0.308999
29	2002	0.755583	88	0.356784	0.759813	129	0.337971
29	2003	0.755583	88	0.353957	0.754585	124	0.328281
29	2004	0.755583	88	0.351458	0.761116	136	0.316462
29	2005	0.755583	88	0.344757	0.754126	121	0.347099
29	2006	0.755583	88	0.343973	0.759985	139	0.317067
29	2007	0.755583	88	0.344555	0.766699	146	0.30317
29	2008	0.755583	88	0.341156	0.744063	142	0.281341
29	2009	0.755583	88	0.344869	0.756978	160	0.281073
29	2010	0.755583	88	0.343589	0.751061	167	0.286942
32	1992	0.743324	175	0.357646	0.749802	212	0.35235
32	1993	0.743324	175	0.358977	0.737787	212	0.359577
32	1994	0.743324	175	0.364658	0.745679	224	0.346436
32	1995	0.743324	175	0.366066	0.75038	223	0.344172
32	1996	0.743324	175	0.365784	0.75113	221	0.351132
32	1997	0.743324	175	0.366113	0.750834	222	0.341655
32	1998	0.743324	175	0.368254	0.751902	223	0.35575
32	1999	0.743324	175	0.366998	0.750535	226	0.361389
32	2000	0.743324	175	0.366755	0.752754	229	0.351826
32	2001	0.743324	175	0.367214	0.752904	231	0.35023
32	2002	0.743324	175	0.36716	0.762984	231	0.34831
32	2003	0.743324	175	0.367595	0.749335	225	0.361811
32	2004	0.743324	175	0.368306	0.751501	211	0.381186
32	2005	0.743324	175	0.366316	0.765003	228	0.354719
32	2006	0.743324	175	0.368012	0.752591	222	0.364326
32	2007	0.743324	175	0.368615	0.758821	231	0.352203
32	2008	0.743324	175	0.370888	0.76323	240	0.347731
32	2009	0.743324	175	0.372085	0.753827	223	0.372822
32	2010	0.743324	175	0.371112	0.751809	229	0.361438
33	1992	0.705831	92	0.532976	0.740713	273	0.439099
33	1993	0.70977	100	0.524198	0.740713	273	0.439636
33	1994	0.70977	100	0.527417	0.740713	273	0.439936
33	1995	0.70977	100	0.529074	0.740713	273	0.440565
33	1996	0.708721	101	0.531539	0.740713	273	0.441031
33	1997	0.708721	101	0.531402	0.740713	273	0.441434
33	1998	0.708721	101	0.530814	0.740364	274	0.44302
33	1999	0.708721	101	0.532738	0.740364	274	0.447223
33	2000	0.705777	106	0.522303	0.740751	273	0.44602
33	2001	0.702966	111	0.50755	0.740751	273	0.445606
33	2002	0.702394	123	0.469984	0.741103	272	0.448051
33	2003	0.702394	123	0.467202	0.741103	272	0.449454
33	2004	0.702394	123	0.466618	0.741103	272	0.447957
33	2005	0.702394	123	0.468112	0.741103	272	0.44791
33	2006	0.702394	123	0.469184	0.741103	272	0.445526
33	2007	0.702394	123	0.466772	0.741189	266	0.443325
33	2008	0.707305	122	0.46089	0.741189	266	0.447585
33	2009	0.707305	122	0.463513	0.741189	266	0.446219
33	2010	0.707305	122	0.463604	0.741189	266	0.446543
35	1992	0.648289	83	0.356898	0.753351	167	0.364857
35	1993	0.648289	83	0.364435	0.753351	167	0.364996
35	1994	0.648289	83	0.373218	0.744319	186	0.348134
35	1995	0.648289	83	0.371004	0.74472	186	0.356434
35	1996	0.648289	83	0.387516	0.743091	188	0.363581
35	1997	0.648289	83	0.389955	0.746374	187	0.365476
35	1998	0.648289	83	0.391275	0.745262	218	0.342046
35	1999	0.648289	83	0.382283	0.744792	214	0.356429
35	2000	0.648289	83	0.381625	0.744073	212	0.360835
35	2001	0.648289	83	0.384296	0.742042	215	0.352457
35	2002	0.648289	83	0.389861	0.741456	211	0.351941
35	2003	0.648289	83	0.387011	0.744772	210	0.349446
35	2004	0.648289	83	0.387893	0.740932	219	0.335826
35	2005	0.648289	83	0.387086	0.743418	212	0.370271
35	2006	0.648289	83	0.38635	0.747815	217	0.367212
35	2007	0.648289	83	0.385492	0.747371	218	0.364105
35	2008	0.648289	83	0.38268	0.749615	217	0.380995
35	2009	0.648289	83	0.381004	0.743182	231	0.370657
35	2010	0.648289	83	0.383951	0.739163	230	0.370231
36	1992	0.744315	49	0.421733	0.764805	92	0.398012
36	1993	0.744315	49	0.435922	0.764805	92	0.396996
36	1994	0.744315	49	0.434879	0.764805	92	0.401244
36	1995	0.744315	49	0.430897	0.764805	92	0.399978
36	1996	0.744315	49	0.420657	0.764805	92	0.39304
36	1997	0.744315	49	0.411144	0.764805	92	0.384199
36	1998	0.744315	49	0.426738	0.764805	92	0.400268
36	1999	0.744315	49	0.425028	0.764805	92	0.385515
36	2000	0.744315	49	0.444699	0.764805	92	0.385863
36	2001	0.744315	49	0.450656	0.764805	92	0.388982
36	2002	0.744315	49	0.450834	0.756853	103	0.337155
36	2003	0.744315	49	0.453481	0.759599	101	0.341816
36	2004	0.744315	49	0.459629	0.748712	109	0.297228
36	2005	0.744315	49	0.468408	0.752103	101	0.304435
36	2006	0.744315	49	0.450826	0.756853	103	0.34766
36	2007	0.744315	49	0.442719	0.743738	105	0.294865
36	2008	0.744315	49	0.460995	0.748092	109	0.28724
36	2009	0.744315	49	0.450481	0.748092	109	0.293087
36	2010	0.744315	49	0.441529	0.748092	109	0.304124
37	1992	0.734026	116	0.335059	0.744331	163	0.339302
37	1993	0.734026	116	0.336974	0.740933	168	0.329328
37	1994	0.734026	116	0.335842	0.738936	162	0.335336
37	1995	0.734026	116	0.334884	0.746273	155	0.333551
37	1996	0.734026	116	0.339574	0.727638	158	0.327529
37	1997	0.734026	116	0.337548	0.735735	151	0.335537
37	1998	0.734026	116	0.340535	0.728094	158	0.331402
37	1999	0.734026	116	0.342587	0.737373	163	0.317401
37	2000	0.734026	116	0.344125	0.741872	152	0.337038
37	2001	0.734026	116	0.344218	0.72811	158	0.336098
37	2002	0.734026	116	0.34777	0.738163	152	0.367279
37	2003	0.734026	116	0.356096	0.737578	158	0.353192
37	2004	0.734026	116	0.355067	0.736444	150	0.368301
37	2005	0.734026	116	0.355002	0.740207	155	0.357495
37	2006	0.734026	116	0.352305	0.737376	162	0.337004
37	2007	0.734026	116	0.355328	0.735312	165	0.336956
37	2008	0.734026	116	0.359423	0.752734	170	0.33496
37	2009	0.734026	116	0.357494	0.736425	149	0.370816
37	2010	0.734026	116	0.360997	0.739225	164	0.366004
38	1992	0.749768	117	0.450201	0.753934	218	0.384405
38	1993	0.749768	117	0.449777	0.75084	234	0.353917
38	1994	0.749768	117	0.447836	0.764185	228	0.367548
38	1995	0.749768	117	0.447885	0.757487	248	0.360163
38	1996	0.749768	117	0.447606	0.76691	242	0.366102
38	1997	0.749768	117	0.446273	0.740436	215	0.3968
38	1998	0.749768	117	0.446389	0.758005	243	0.365761
38	1999	0.749768	117	0.445902	0.759689	243	0.363137
38	2000	0.749768	117	0.444506	0.760108	231	0.379669
38	2001	0.749768	117	0.44345	0.75881	236	0.375293
38	2002	0.749768	117	0.446359	0.756901	234	0.381013
38	2003	0.749768	117	0.444799	0.759737	239	0.364033
38	2004	0.749768	117	0.44224	0.747526	226	0.391413
38	2005	0.749768	117	0.443976	0.755312	226	0.373749
38	2006	0.749768	117	0.441811	0.751777	233	0.361435
38	2007	0.749768	117	0.441864	0.755878	242	0.348704
38	2008	0.749768	117	0.442054	0.761555	236	0.362328
38	2009	0.749768	117	0.442745	0.760182	239	0.366196
38	2010	0.749768	117	0.444288	0.759825	242	0.354486
39	1992	0.740905	96	0.330451	0.742863	100	0.39519
39	1993	0.740905	96	0.331967	0.742417	101	0.39718
39	1994	0.740905	96	0.330279	0.749954	154	0.3141
39	1995	0.740905	96	0.327926	0.7356	151	0.326306
39	1996	0.740905	96	0.325697	0.743257	155	0.28892
39	1997	0.740905	96	0.324751	0.732997	145	0.288654
39	1998	0.740905	96	0.332939	0.732997	145	0.307488
39	1999	0.740905	96	0.328905	0.736874	149	0.293344
39	2000	0.740905	96	0.330207	0.741354	142	0.339468
39	2001	0.740905	96	0.330846	0.754985	131	0.305625
39	2002	0.740905	96	0.330748	0.749382	134	0.310512
39	2003	0.740905	96	0.334666	0.758083	133	0.368756
39	2004	0.73543	93	0.324684	0.742592	126	0.356386
39	2005	0.740905	96	0.331842	0.745481	126	0.373014
39	2006	0.740905	96	0.336071	0.751258	128	0.375806
39	2007	0.740905	96	0.341006	0.750169	130	0.375739
39	2008	0.740905	96	0.339854	0.756021	131	0.350345
39	2009	0.740905	96	0.345374	0.756021	131	0.352631
39	2010	0.740905	96	0.344523	0.757445	144	0.320258
40	1992	0.697604	121	0.498953	0.743902	203	0.434064
40	1993	0.697604	121	0.499057	0.744333	202	0.437941
40	1994	0.697604	121	0.498411	0.746321	208	0.430092
40	1995	0.697604	121	0.499494	0.74196	223	0.409596
40	1996	0.697604	121	0.499097	0.741944	225	0.401085
40	1997	0.697604	121	0.500951	0.736675	242	0.376674
40	1998	0.696424	129	0.468264	0.740446	239	0.379477
40	1999	0.696424	129	0.47229	0.762053	243	0.3709
40	2000	0.696424	129	0.472417	0.760738	246	0.374771
40	2001	0.696424	129	0.471734	0.743551	226	0.399263
40	2002	0.696424	129	0.469865	0.754484	265	0.34973
40	2003	0.696424	129	0.469848	0.755905	261	0.359482
40	2004	0.699504	130	0.473925	0.759142	265	0.356113
40	2005	0.699504	130	0.474783	0.761452	255	0.372597
40	2006	0.699504	130	0.474652	0.756829	249	0.375721
40	2007	0.699504	130	0.476308	0.756823	261	0.36244
40	2008	0.699504	130	0.476201	0.75786	259	0.374014
40	2009	0.699504	130	0.476084	0.756158	250	0.379254
40	2010	0.699504	130	0.476781	0.755816	264	0.364765
44	1992	0.749709	145	0.392399	0.758671	257	0.349192
44	1993	0.749709	145	0.393725	0.753483	248	0.354682
44	1994	0.750597	144	0.38916	0.754943	252	0.348428
44	1995	0.751674	143	0.389007	0.751898	258	0.344637
44	1996	0.751674	143	0.383255	0.749853	252	0.362403
44	1997	0.750589	144	0.395334	0.748434	255	0.365906
44	1998	0.750589	144	0.394557	0.745261	258	0.360756
44	1999	0.747295	175	0.403719	0.744919	254	0.367852
44	2000	0.747295	175	0.405772	0.746091	258	0.371902
44	2001	0.747295	175	0.406146	0.749404	259	0.368621
44	2002	0.747295	175	0.406141	0.7537	265	0.361866
44	2003	0.747295	175	0.40783	0.752527	258	0.375943
44	2004	0.747295	175	0.405773	0.750706	253	0.380329
44	2005	0.747295	175	0.40603	0.75035	257	0.385005
44	2006	0.747295	175	0.406396	0.762614	267	0.372254
44	2007	0.747295	175	0.406068	0.756571	259	0.374192
44	2008	0.747295	175	0.406367	0.751326	263	0.370372
44	2009	0.747295	175	0.407516	0.764383	265	0.364777
44	2010	0.747295	175	0.411498	0.754077	256	0.381713
45	1992	0.736248	89	0.308174	0.75584	101	0.363831
45	1993	0.736248	89	0.308344	0.749265	99	0.356172
45	1994	0.736248	89	0.308367	0.74954	98	0.364139
45	1995	0.745671	91	0.311226	0.761235	130	0.351088
45	1996	0.745671	91	0.311716	0.754157	142	0.331826
45	1997	0.745671	91	0.309431	0.753289	130	0.339741
45	1998	0.745671	91	0.311574	0.769204	156	0.302209
45	1999	0.745671	91	0.311004	0.751942	152	0.305811
45	2000	0.745671	91	0.311419	0.750953	135	0.33862
45	2001	0.745671	91	0.311568	0.749524	141	0.340131
45	2002	0.745671	91	0.306473	0.756441	145	0.346239
45	2003	0.745671	91	0.308728	0.769683	143	0.33333
45	2004	0.745671	91	0.305458	0.781179	143	0.330965
45	2005	0.745671	91	0.306908	0.763295	135	0.337601
45	2006	0.745671	91	0.308067	0.760524	137	0.333033
45	2007	0.745671	91	0.311154	0.760925	131	0.346934
45	2008	0.745671	91	0.307671	0.755643	129	0.340356
45	2009	0.745671	91	0.308557	0.756144	128	0.344124
45	2010	0.745671	91	0.308099	0.766378	125	0.346803
46	1992	0.752394	94	0.342751	0.753936	166	0.329478
46	1993	0.756177	98	0.344018	0.759445	157	0.360835
46	1994	0.756177	98	0.343835	0.755319	177	0.315193
46	1995	0.754227	101	0.351648	0.775109	154	0.356565
46	1996	0.741875	115	0.394611	0.739384	145	0.417083
46	1997	0.741875	115	0.394098	0.747603	150	0.404928
46	1998	0.741875	115	0.394116	0.747603	150	0.406523
46	1999	0.741875	115	0.395053	0.747741	147	0.425101
46	2000	0.741875	115	0.395429	0.748642	146	0.428275
46	2001	0.756173	122	0.389012	0.753768	156	0.408441
46	2002	0.756173	122	0.389873	0.7548	182	0.384084
46	2003	0.756173	122	0.39156	0.75563	175	0.395058
46	2004	0.756173	122	0.391314	0.753549	191	0.352393
46	2005	0.756173	122	0.390468	0.76269	198	0.379411
46	2006	0.756173	122	0.387559	0.771994	210	0.349824
46	2007	0.756173	122	0.385329	0.765145	225	0.322298
46	2008	0.756173	122	0.385812	0.771816	221	0.332682
46	2009	0.756173	122	0.387328	0.771358	220	0.339791
46	2010	0.756173	122	0.386594	0.769644	224	0.337743
47	1992	0.703024	71	0.344392	0.740755	141	0.363504
47	1993	0.703024	71	0.330091	0.740755	141	0.35662
47	1994	0.703024	71	0.330348	0.739922	142	0.36589
47	1995	0.703024	71	0.330627	0.739922	142	0.36188
47	1996	0.707285	69	0.311029	0.741877	140	0.352901
47	1997	0.707285	69	0.313453	0.740715	149	0.343534
47	1998	0.707285	69	0.316729	0.744551	128	0.387508
47	1999	0.691834	67	0.313237	0.728476	152	0.341684
47	2000	0.691834	67	0.314381	0.728476	152	0.340229
47	2001	0.691834	67	0.32127	0.731972	135	0.386412
47	2002	0.691834	67	0.326588	0.720767	146	0.348666
47	2003	0.691834	67	0.320415	0.708081	161	0.320369
47	2004	0.696665	64	0.324838	0.716983	163	0.316166
47	2005	0.696665	64	0.324096	0.713288	168	0.327408
47	2006	0.696665	64	0.317492	0.707576	167	0.322879
47	2007	0.696665	64	0.333768	0.711834	150	0.339319
47	2008	0.696665	64	0.339528	0.711834	150	0.340211
47	2009	0.696665	64	0.33772	0.711834	150	0.334388
47	2010	0.696665	64	0.336899	0.741504	154	0.345302
48	1992	0.741285	123	0.371902	0.771432	199	0.341972
48	1993	0.742733	122	0.370912	0.764897	194	0.348974
48	1994	0.742733	122	0.368488	0.755888	218	0.370589
48	1995	0.742733	122	0.368638	0.756275	228	0.358378
48	1996	0.742733	122	0.368285	0.762449	215	0.352712
48	1997	0.742733	122	0.363879	0.753783	235	0.350936
48	1998	0.746412	123	0.367694	0.753424	229	0.374373
48	1999	0.746412	123	0.370661	0.75274	234	0.361936
48	2000	0.746412	123	0.369004	0.751683	241	0.365104
48	2001	0.746412	123	0.366836	0.753484	237	0.371042
48	2002	0.746412	123	0.368377	0.756178	232	0.37674
48	2003	0.746412	123	0.371159	0.75212	228	0.391409
48	2004	0.746412	123	0.368519	0.75637	231	0.387491
48	2005	0.746412	123	0.366147	0.75483	236	0.385335
48	2006	0.746412	123	0.368222	0.754318	237	0.377446
48	2007	0.746412	123	0.367254	0.764869	244	0.371903
48	2008	0.746412	123	0.36468	0.766285	248	0.370482
48	2009	0.746412	123	0.364082	0.769161	236	0.379969
48	2010	0.746412	123	0.365775	0.758007	229	0.38944
49	1992	0.737299	130	0.412399	0.761167	173	0.433916
49	1993	0.737299	130	0.412118	0.7602	177	0.428325
49	1994	0.737299	130	0.411625	0.762888	173	0.431667
49	1995	0.737299	130	0.411896	0.763048	173	0.429776
49	1996	0.737299	130	0.409983	0.762888	173	0.421037
49	1997	0.737299	130	0.407809	0.762489	174	0.424109
49	1998	0.737299	130	0.412356	0.7602	177	0.428278
49	1999	0.73694	131	0.41561	0.757091	243	0.392985
49	2000	0.73694	131	0.417141	0.753681	242	0.39436
49	2001	0.73694	131	0.417635	0.764366	255	0.379922
49	2002	0.73694	131	0.419105	0.766308	258	0.370857
49	2003	0.73694	131	0.41861	0.758747	242	0.400699
49	2004	0.73694	131	0.419357	0.765007	253	0.38293
49	2005	0.73694	131	0.419788	0.761326	240	0.392432
49	2006	0.73694	131	0.418907	0.749344	208	0.408577
49	2007	0.73694	131	0.421222	0.761429	235	0.401521
49	2008	0.73694	131	0.419433	0.771085	223	0.38611
49	2009	0.73694	131	0.419649	0.765473	218	0.393424
49	2010	0.73694	131	0.42079	0.76607	224	0.395695
50	1992	0.664477	144	0.465326	0.727236	228	0.42164
50	1993	0.664477	144	0.464534	0.730221	226	0.41769
50	1994	0.664477	144	0.470067	0.72701	233	0.4108
50	1995	0.664477	144	0.46626	0.724802	235	0.40746
50	1996	0.664477	144	0.462511	0.728925	225	0.415438
50	1997	0.664477	144	0.465594	0.720121	228	0.411011
50	1998	0.664477	144	0.462348	0.728232	235	0.405676
50	1999	0.664477	144	0.460712	0.726065	233	0.423245
50	2000	0.664477	144	0.460463	0.7272	238	0.410515
50	2001	0.664477	144	0.460262	0.745298	257	0.388645
50	2002	0.664477	144	0.458108	0.728345	237	0.415574
50	2003	0.664477	144	0.455407	0.726866	236	0.408836
50	2004	0.664477	144	0.455779	0.754356	263	0.391816
50	2005	0.664477	144	0.45724	0.725543	240	0.419484
50	2006	0.664477	144	0.459887	0.728881	246	0.410224
50	2007	0.664477	144	0.462184	0.734258	249	0.407426
50	2008	0.664477	144	0.463406	0.733002	252	0.412511
50	2009	0.664477	144	0.464719	0.733801	257	0.40406
50	2010	0.664477	144	0.460103	0.734202	252	0.404855
51	1992	0.687955	137	0.43829	0.717117	181	0.468394
52	1992	0.664888	120	0.41182	0.676942	125	0.43585
52	1993	0.664888	120	0.420216	0.677065	126	0.460731
52	1994	0.664888	120	0.421356	0.705852	165	0.445928
52	1995	0.664888	120	0.421026	0.71953	153	0.434193
52	1996	0.693188	128	0.399975	0.722027	146	0.436724
52	1997	0.693188	128	0.408245	0.720799	147	0.438977
52	1998	0.684551	142	0.425421	0.714192	162	0.450428
52	1999	0.656371	135	0.44912	0.720143	186	0.456167
52	2000	0.658523	147	0.419764	0.712387	183	0.425052
52	2001	0.658523	147	0.418592	0.699035	195	0.418737
52	2002	0.659722	146	0.419158	0.742691	216	0.391005
52	2003	0.659393	147	0.420705	0.738608	221	0.374314
52	2004	0.68118	155	0.40785	0.739478	211	0.400176
52	2005	0.680817	156	0.405121	0.709831	199	0.419849
52	2006	0.683547	157	0.411696	0.707637	221	0.395297
52	2007	0.680817	156	0.412271	0.720145	220	0.406902
52	2008	0.683059	159	0.421926	0.733991	229	0.396365
52	2009	0.683059	159	0.419267	0.730069	218	0.426539
52	2010	0.683059	159	0.418525	0.728207	241	0.393643
53	1992	0.751701	119	0.355454	0.753975	170	0.365419
53	1993	0.751701	119	0.352455	0.750625	157	0.372296
53	1994	0.751701	119	0.354657	0.746855	164	0.359351
53	1995	0.750811	120	0.354035	0.751391	160	0.356823
53	1996	0.750811	120	0.352572	0.754597	162	0.359488
53	1997	0.746066	132	0.331397	0.750687	174	0.352091
53	1998	0.745308	133	0.333095	0.736963	174	0.34811
53	1999	0.745308	133	0.332741	0.752781	166	0.379594
53	2000	0.745308	133	0.330731	0.74534	162	0.366212
53	2001	0.745308	133	0.327839	0.740569	183	0.336025
53	2002	0.745308	133	0.327234	0.738246	179	0.348635
53	2003	0.745308	133	0.326732	0.741522	182	0.358806
53	2004	0.745308	133	0.326985	0.756867	214	0.318442
53	2005	0.745308	133	0.328644	0.761864	190	0.353954
53	2006	0.745308	133	0.326309	0.761644	196	0.326017
53	2007	0.745308	133	0.328161	0.766568	195	0.340021
53	2008	0.745308	133	0.32906	0.765607	215	0.323278
53	2009	0.745308	133	0.325877	0.761719	222	0.307363
53	2010	0.747418	130	0.33005	0.746154	203	0.339524
54	1992	0.634436	74	0.366716	0.754253	287	0.372137
54	1993	0.63291	76	0.359449	0.746203	280	0.372902
54	1994	0.63291	76	0.363169	0.732535	271	0.395985
54	1995	0.63291	76	0.371781	0.747497	281	0.387682
54	1996	0.629463	75	0.364872	0.747442	281	0.38338
54	1997	0.636825	76	0.368775	0.73418	266	0.406397
54	1998	0.636825	76	0.369273	0.73354	268	0.401968
54	1999	0.636825	76	0.366719	0.732684	265	0.411037
54	2000	0.653285	78	0.376004	0.747936	275	0.405612
54	2001	0.653285	78	0.376477	0.755715	287	0.391334
54	2002	0.653285	78	0.379649	0.746198	280	0.404834
54	2003	0.653703	79	0.386663	0.745973	281	0.423486
54	2004	0.658757	86	0.381476	0.7464	280	0.413168
54	2005	0.658448	85	0.380982	0.747253	282	0.40572
54	2006	0.658757	86	0.386275	0.747253	282	0.405131
54	2007	0.658757	86	0.38538	0.756265	286	0.395241
54	2008	0.658757	86	0.385659	0.742628	276	0.411365
54	2009	0.658757	86	0.387428	0.742628	276	0.416981
54	2010	0.659399	89	0.395534	0.755958	285	0.400529
55	1992	0.746099	122	0.357189	0.762482	140	0.416636
55	1993	0.746099	122	0.356924	0.762482	140	0.419587
55	1994	0.746099	122	0.356067	0.759404	148	0.407299
55	1995	0.742714	130	0.339047	0.761489	166	0.387872
55	1996	0.742714	130	0.340413	0.753683	176	0.359539
55	1997	0.742714	130	0.338479	0.7539	171	0.377842
55	1998	0.742714	130	0.34124	0.7539	171	0.380237
55	1999	0.742714	130	0.345342	0.7539	171	0.382474
55	2000	0.742714	130	0.343214	0.754315	170	0.416067
55	2001	0.742714	130	0.343636	0.751346	171	0.3939
55	2002	0.742714	130	0.344389	0.752575	172	0.405791
55	2003	0.742714	130	0.345825	0.754933	170	0.409128
55	2004	0.742714	130	0.345118	0.750489	171	0.417827
55	2005	0.742714	130	0.347644	0.744654	186	0.397269
55	2006	0.742714	130	0.344405	0.750216	172	0.419603
55	2007	0.742714	130	0.344739	0.74855	174	0.424013
55	2008	0.742714	130	0.346038	0.750473	172	0.419922
55	2009	0.742714	130	0.347814	0.753249	172	0.435694
55	2010	0.742714	130	0.342365	0.758017	165	0.431716
56	1992	0.735671	135	0.410094	0.75461	166	0.446142
56	1993	0.735671	135	0.40936	0.752684	169	0.444181
56	1994	0.735671	135	0.409316	0.750994	175	0.431244
56	1995	0.738842	131	0.408257	0.756133	164	0.450777
56	1996	0.738842	131	0.411092	0.754126	167	0.453788
56	1997	0.738842	131	0.407985	0.751513	174	0.425902
56	1998	0.738842	131	0.408517	0.755151	165	0.449252
56	1999	0.738842	131	0.410184	0.757177	162	0.450116
56	2000	0.738842	131	0.408261	0.755151	165	0.445354
56	2001	0.738842	131	0.408817	0.757177	162	0.450989
56	2002	0.738842	131	0.40979	0.746385	196	0.404047
56	2003	0.738842	131	0.410354	0.743964	204	0.391147
56	2004	0.738842	131	0.409081	0.742872	206	0.38556
56	2005	0.738842	131	0.409002	0.750602	196	0.415529
56	2006	0.738842	131	0.407446	0.759352	216	0.380218
56	2007	0.738842	131	0.407384	0.75605	214	0.382167
56	2008	0.738842	131	0.40629	0.75605	214	0.38318
56	2009	0.737625	132	0.407048	0.759352	216	0.382195
56	2010	0.737625	132	0.40484	0.759352	216	0.381634
57	1992	0.677001	68	0.464248	0.679413	116	0.452023
57	1993	0.677001	68	0.465624	0.695798	121	0.431078
57	1994	0.677001	68	0.462586	0.71019	116	0.468643
57	1995	0.687434	72	0.456299	0.715237	120	0.476505
57	1996	0.687434	72	0.462578	0.715237	120	0.478354
57	1997	0.687434	72	0.468712	0.715237	120	0.479949
57	1998	0.687434	72	0.467646	0.730784	224	0.380388
57	1999	0.687434	72	0.468518	0.734616	224	0.379465
57	2000	0.687434	72	0.471595	0.733396	219	0.383825
57	2001	0.687434	72	0.470729	0.731071	244	0.357772
57	2002	0.687434	72	0.47089	0.731039	233	0.364657
57	2003	0.686338	78	0.483135	0.729269	230	0.376201
57	2004	0.686338	78	0.481142	0.747176	255	0.365873
57	2005	0.686338	78	0.4826	0.747396	250	0.358083
57	2006	0.686463	79	0.490387	0.731421	243	0.375629
57	2007	0.686463	79	0.488608	0.747547	253	0.361876
57	2008	0.686463	79	0.489827	0.739317	241	0.373155
57	2009	0.686463	79	0.490661	0.760845	259	0.351996
57	2010	0.686463	79	0.493222	0.751708	249	0.3749
58	1992	0.727977	180	0.424403	0.736856	222	0.393464
58	1993	0.72736	181	0.430079	0.731641	233	0.384609
58	1994	0.72736	181	0.429226	0.733069	235	0.378879
58	1995	0.726783	182	0.427291	0.730313	243	0.378257
58	1996	0.726783	182	0.433548	0.740509	256	0.365127
58	1997	0.726783	182	0.425396	0.729506	243	0.374077
58	1998	0.726783	182	0.428666	0.733978	239	0.385136
58	1999	0.731912	184	0.4379	0.741143	242	0.38546
58	2000	0.731912	184	0.436996	0.741731	255	0.370717
58	2001	0.731912	184	0.436273	0.741251	237	0.396174
58	2002	0.731912	184	0.438072	0.744964	250	0.387457
58	2003	0.731912	184	0.437764	0.745206	237	0.398366
58	2004	0.731912	184	0.437061	0.73853	249	0.389587
58	2005	0.731912	184	0.439977	0.76287	233	0.408461
58	2006	0.731912	184	0.437719	0.754637	254	0.379292
58	2007	0.731912	184	0.438279	0.741253	251	0.382926
58	2008	0.731912	184	0.43851	0.74635	266	0.370084
58	2009	0.731912	184	0.43858	0.757622	264	0.367225
58	2010	0.731912	184	0.440565	0.754144	251	0.386138
59	1992	0.670258	173	0.437733	0.721716	235	0.404745
59	1993	0.670258	173	0.43815	0.711968	231	0.400238
59	1994	0.670258	173	0.440172	0.708779	239	0.419555
59	1995	0.670258	173	0.440568	0.70501	235	0.411894
59	1996	0.670258	173	0.439513	0.709215	225	0.426662
59	1997	0.670258	173	0.437549	0.704172	238	0.405486
59	1998	0.670258	173	0.437754	0.71797	245	0.403725
59	1999	0.670258	173	0.438062	0.724325	251	0.403101
59	2000	0.670004	174	0.441348	0.726594	250	0.396462
59	2001	0.670004	174	0.441409	0.710304	241	0.411543
59	2002	0.670004	174	0.443106	0.717712	246	0.41515
59	2003	0.670004	174	0.442163	0.740463	260	0.393025
59	2004	0.670004	174	0.44109	0.720432	246	0.402911
59	2005	0.670004	174	0.44229	0.719278	249	0.408016
59	2006	0.670004	174	0.443029	0.724871	253	0.405359
59	2007	0.670004	174	0.443372	0.73402	247	0.41328
59	2008	0.670004	174	0.444937	0.731283	260	0.402491
59	2009	0.670004	174	0.445225	0.736324	261	0.40834
59	2010	0.670004	174	0.446156	0.734927	259	0.402493
60	1992	0.703391	114	0.401072	0.740656	185	0.39066
60	1993	0.703391	114	0.401023	0.730501	212	0.368557
60	1994	0.708112	115	0.41134	0.748037	220	0.374389
60	1995	0.711337	103	0.440056	0.721729	217	0.386791
60	1996	0.711337	103	0.453511	0.722758	218	0.372039
60	1997	0.717057	99	0.453738	0.729133	214	0.386785
60	1998	0.711337	103	0.446727	0.725497	227	0.367527
60	1999	0.706674	108	0.441815	0.736624	227	0.379409
60	2000	0.706674	108	0.441646	0.743901	244	0.397507
60	2001	0.706674	108	0.44746	0.733366	251	0.396576
60	2002	0.706674	108	0.449106	0.740828	260	0.391604
60	2003	0.706674	108	0.451463	0.743866	256	0.388708
60	2004	0.706674	108	0.442814	0.740521	261	0.370001
60	2005	0.706674	108	0.416458	0.752357	265	0.361506
60	2006	0.704011	110	0.423537	0.75265	264	0.368559
60	2007	0.704011	110	0.421655	0.750027	256	0.382831
60	2008	0.704011	110	0.422271	0.747113	254	0.380332
60	2009	0.704011	110	0.416987	0.748703	264	0.375614
60	2010	0.704011	110	0.418114	0.748706	264	0.369611
61	1992	0.78739	22	0.480634	0.709206	49	0.400424
61	1993	0.78739	22	0.477875	0.709206	49	0.396321
61	1994	0.78739	22	0.481855	0.778533	33	0.568367
61	1995	0.78739	22	0.48327	0.780671	34	0.588036
61	1996	0.78739	22	0.484413	0.778533	33	0.577766
61	1997	0.78739	22	0.483885	0.780671	34	0.591755
61	1998	0.78739	22	0.483431	0.778533	33	0.584782
61	1999	0.78739	22	0.48198	0.780671	34	0.589581
61	2000	0.78739	22	0.483915	0.778533	33	0.594985
61	2001	0.78739	22	0.483988	0.778533	33	0.5961
61	2002	0.78739	22	0.482562	0.75213	56	0.411246
61	2003	0.78739	22	0.481832	0.75213	56	0.420842
61	2004	0.78739	22	0.480855	0.75213	56	0.414419
61	2005	0.78739	22	0.481386	0.712076	73	0.3376
61	2006	0.78739	22	0.4811	0.711911	72	0.330688
61	2007	0.78739	22	0.48164	0.711911	72	0.32844
61	2008	0.78739	22	0.48033	0.711911	72	0.326977
61	2009	0.78739	22	0.481218	0.711911	72	0.332243
61	2010	0.78739	22	0.479776	0.75213	56	0.429375
62	1992	0.765064	185	0.393522	0.769718	215	0.393553
63	1992	0.669314	64	0.464172	0.709498	182	0.361894
63	1993	0.669314	64	0.466261	0.725213	211	0.35662
63	1994	0.669314	64	0.465425	0.723969	226	0.359934
63	1995	0.669314	64	0.464944	0.744392	233	0.354936
63	1996	0.669314	64	0.462204	0.734613	228	0.382719
63	1997	0.669314	64	0.472215	0.728651	231	0.38693
63	1998	0.669314	64	0.454743	0.741476	239	0.382488
63	1999	0.669314	64	0.448254	0.742458	241	0.370857
63	2000	0.669314	64	0.457196	0.729458	230	0.385955
63	2001	0.675909	65	0.469059	0.731155	231	0.38019
63	2002	0.675909	65	0.458621	0.730896	231	0.371968
63	2003	0.679347	63	0.445696	0.730254	233	0.379812
63	2004	0.692089	74	0.421319	0.73312	239	0.400239
63	2005	0.692089	74	0.412441	0.733055	234	0.407763
63	2006	0.692089	74	0.403595	0.744656	253	0.386095
63	2007	0.692089	74	0.401653	0.745666	250	0.397328
63	2008	0.674457	81	0.377662	0.742568	249	0.396997
63	2009	0.674457	81	0.374987	0.745519	247	0.405376
63	2010	0.674457	81	0.387084	0.743462	253	0.398234
64	1992	0	1	0	0.730224	205	0.304808
64	1993	0	1	0	0.725556	188	0.302134
64	1994	0	1	0	0.72545	194	0.304802
64	1995	0	1	0	0.728365	171	0.340609
64	1996	0	1	0	0.731508	199	0.304137
64	1997	0	1	0	0.726794	191	0.310826
64	1998	0	1	0	0.732514	197	0.304601
64	1999	0	1	0	0.726087	192	0.311408
64	2000	0	1	0	0.725071	194	0.29024
64	2001	0	1	0	0.723091	200	0.267503
64	2002	0	1	0	0.722585	203	0.30498
64	2003	0	1	0	0.720295	196	0.317031
64	2004	0	1	0	0.724615	199	0.320995
64	2005	0	1	0	0.710985	175	0.348801
64	2006	0	1	0	0.711478	168	0.351418
64	2007	0	1	0	0.717991	174	0.356523
64	2008	0	1	0	0.717991	174	0.365881
64	2009	0	1	0	0.726689	184	0.356574
64	2010	0	1	0	0.747405	155	0.402373
65	2003	0	0	0	1	3	1
65	2004	0	0	0	1	3	1
65	2005	0	0	0	1	3	1
65	2006	0	0	0	1	3	1
65	2007	0	0	0	1	3	1
66	1992	0.728534	117	0.299214	0.738761	207	0.356222
66	1993	0.721878	124	0.317585	0.747841	232	0.354753
66	1994	0.721878	124	0.326274	0.751328	219	0.374239
66	1995	0.721878	124	0.323068	0.740824	205	0.381919
66	1996	0.721878	124	0.317793	0.742876	206	0.367378
66	1997	0.721878	124	0.322796	0.744188	204	0.368002
66	1998	0.721878	124	0.330697	0.743078	205	0.371306
66	1999	0.721878	124	0.321225	0.746076	209	0.365541
66	2000	0.721878	124	0.323649	0.735054	221	0.373892
66	2001	0.721878	124	0.32116	0.733371	224	0.359357
66	2002	0.721878	124	0.321872	0.727715	233	0.350631
66	2003	0.721878	124	0.330025	0.733129	240	0.377055
66	2004	0.72592	110	0.351471	0.744369	230	0.385654
66	2005	0.72592	110	0.351274	0.743677	229	0.392846
66	2006	0.72592	110	0.353635	0.738577	226	0.400495
66	2007	0.72592	110	0.351508	0.737589	227	0.392836
66	2008	0.72592	110	0.354522	0.736692	230	0.384943
66	2009	0.72592	110	0.353375	0.751755	226	0.3829
66	2010	0.72592	110	0.357334	0.737953	223	0.39492
67	1992	0.686747	59	0.420867	0.730936	234	0.390865
67	1993	0.686586	60	0.42132	0.73106	234	0.38844
67	1994	0.683019	67	0.41141	0.746067	250	0.374725
67	1995	0.678029	72	0.400185	0.748996	247	0.384275
67	1996	0.688687	76	0.399064	0.730819	247	0.391452
67	1997	0.688687	76	0.395514	0.748266	268	0.370928
67	1998	0.688687	76	0.39652	0.746263	274	0.36743
67	1999	0.688687	76	0.397507	0.74203	272	0.369827
67	2000	0.688687	76	0.401062	0.746491	277	0.372417
67	2001	0.688687	76	0.400945	0.74485	276	0.372666
67	2002	0.688687	76	0.399605	0.742809	272	0.38016
67	2003	0.688687	76	0.403043	0.745633	279	0.376558
67	2004	0.688687	76	0.402475	0.727762	266	0.385667
67	2005	0.695051	77	0.398941	0.741042	277	0.379956
67	2006	0.695051	77	0.400762	0.732412	263	0.391639
67	2007	0.695051	77	0.395164	0.74464	268	0.39384
67	2008	0.695051	77	0.391576	0.740268	271	0.388379
67	2009	0.695051	77	0.395029	0.756569	280	0.375588
67	2010	0.695051	77	0.399221	0.754531	284	0.376041
68	1992	0.679741	135	0.540506	0.75452	287	0.431983
68	1993	0.679741	135	0.539018	0.75452	287	0.430207
68	1994	0.679741	135	0.5374	0.755672	288	0.438013
68	1995	0.679741	135	0.535481	0.756372	286	0.431529
68	1996	0.679741	135	0.535817	0.756023	287	0.42755
68	1997	0.679741	135	0.535793	0.755672	288	0.428029
68	1998	0.679741	135	0.535529	0.755672	288	0.428226
68	1999	0.679741	135	0.5356	0.755672	288	0.431544
68	2000	0.679058	123	0.575837	0.756023	287	0.435463
68	2001	0.699826	132	0.549721	0.754503	287	0.433822
68	2002	0.699826	132	0.549818	0.754855	286	0.430464
68	2003	0.699826	132	0.549576	0.754855	286	0.431788
68	2004	0.699826	132	0.549247	0.754855	286	0.43142
68	2005	0.700364	130	0.551366	0.754855	286	0.430215
68	2006	0.700364	130	0.554061	0.754855	286	0.431686
68	2007	0.700364	130	0.553187	0.754774	282	0.437058
68	2008	0.701786	140	0.516542	0.754774	282	0.432128
68	2009	0.701786	140	0.517392	0.754774	282	0.433789
68	2010	0.701786	140	0.519833	0.754774	282	0.438716
69	1992	0.685273	62	0.363981	0.685273	62	0.363981
69	1993	0.692945	63	0.373336	0.692945	63	0.373336
69	1994	0.679698	92	0.354188	0.679698	92	0.354188
69	1995	0.679698	92	0.359287	0.679698	92	0.359287
69	1996	0.679698	92	0.364034	0.679698	92	0.364034
69	1997	0.679698	92	0.363632	0.679698	92	0.363632
69	1998	0.688294	86	0.351167	0.688294	86	0.351167
69	1999	0.688294	86	0.352367	0.688294	86	0.352367
69	2000	0.688294	86	0.352408	0.688294	86	0.352408
69	2001	0.688294	86	0.351877	0.688294	86	0.351877
69	2002	0.688294	86	0.351926	0.688294	86	0.351926
69	2003	0.688294	86	0.35051	0.688294	86	0.35051
69	2004	0.688294	86	0.3504	0.688294	86	0.3504
69	2005	0.688294	86	0.355762	0.688294	86	0.355762
69	2006	0.688294	86	0.34498	0.688294	86	0.34498
69	2007	0.688294	86	0.347884	0.688294	86	0.347884
69	2008	0.688294	86	0.348681	0.688294	86	0.348681
69	2009	0.688294	86	0.34824	0.688294	86	0.34824
69	2010	0.688294	86	0.350683	0.688294	86	0.350683
70	1992	0.701343	103	0.347669	0.736046	222	0.35312
70	1993	0.701343	103	0.353275	0.75794	233	0.339282
70	1994	0.701343	103	0.357814	0.741652	222	0.349006
70	1995	0.701343	103	0.359349	0.713865	209	0.366463
70	1996	0.701343	103	0.362383	0.719113	209	0.365094
70	1997	0.701343	103	0.365453	0.717454	212	0.357252
70	1998	0.701343	103	0.367419	0.718682	210	0.361972
70	1999	0.701343	103	0.368028	0.717944	211	0.363796
70	2000	0.701343	103	0.371352	0.717944	211	0.365365
70	2001	0.701343	103	0.372336	0.721017	224	0.369976
70	2002	0.701343	103	0.373517	0.715687	216	0.379523
70	2003	0.701343	103	0.372502	0.713363	222	0.373976
70	2004	0.701343	103	0.37421	0.730015	232	0.358718
70	2005	0.701343	103	0.372475	0.726358	229	0.365848
70	2006	0.701343	103	0.370536	0.731618	236	0.364947
70	2007	0.701343	103	0.372724	0.723414	230	0.372943
70	2008	0.701343	103	0.374697	0.72515	227	0.372767
70	2009	0.701343	103	0.376533	0.742107	244	0.355766
70	2010	0.701343	103	0.373707	0.747664	245	0.349759
72	1992	0.654679	78	0.473601	0.732711	160	0.389422
72	1993	0.654679	78	0.473775	0.732711	160	0.371621
72	1994	0.654679	78	0.469038	0.732711	160	0.380673
72	1995	0.654679	78	0.4734	0.732711	160	0.374324
72	1996	0.654679	78	0.47384	0.732711	160	0.354125
72	1997	0.654679	78	0.471333	0.733549	159	0.340888
72	1998	0.654679	78	0.470277	0.734814	158	0.354252
72	1999	0.654679	78	0.473592	0.730149	163	0.344751
72	2000	0.654679	78	0.472942	0.725851	164	0.346787
72	2001	0.654679	78	0.480632	0.730625	166	0.375533
72	2002	0.654679	78	0.475355	0.726474	180	0.370053
72	2003	0.654679	78	0.470742	0.722583	198	0.344742
72	2004	0.654679	78	0.463554	0.716108	180	0.332711
72	2005	0.654679	78	0.467756	0.72147	188	0.330953
72	2006	0.654679	78	0.46639	0.730533	192	0.318846
72	2007	0.654679	78	0.468584	0.726023	196	0.311987
72	2008	0.654679	78	0.467618	0.72566	197	0.312362
72	2009	0.654679	78	0.46978	0.72566	197	0.318634
72	2010	0.65487	77	0.466521	0.713453	182	0.329313
73	1992	0.65999	98	0.468396	0.680106	106	0.481293
73	1993	0.65999	98	0.465376	0.702222	130	0.462187
73	1994	0.675379	104	0.456661	0.697954	133	0.444937
73	1995	0.675379	104	0.457104	0.68812	134	0.456623
73	1996	0.675379	104	0.460252	0.68923	132	0.467292
73	1997	0.675379	104	0.448143	0.691777	137	0.454836
73	1998	0.670526	107	0.449412	0.706049	142	0.461834
73	1999	0.671272	106	0.455654	0.709893	141	0.456784
73	2000	0.671203	115	0.441676	0.70828	178	0.434173
73	2001	0.671203	115	0.443648	0.707224	182	0.423404
73	2002	0.671232	107	0.463427	0.725245	192	0.411083
73	2003	0.671203	115	0.437982	0.717523	193	0.418677
73	2004	0.675078	119	0.45066	0.722012	206	0.402948
73	2005	0.683104	123	0.447659	0.726664	196	0.416335
73	2006	0.683104	123	0.450625	0.728066	206	0.41769
73	2007	0.683104	123	0.448383	0.730815	208	0.41386
73	2008	0.683104	123	0.451661	0.731735	212	0.415338
73	2009	0.679124	122	0.445588	0.734156	207	0.403137
73	2010	0.679124	122	0.449091	0.733628	188	0.443922
74	1992	0.719053	84	0.266903	0.743782	156	0.341254
74	1993	0.717511	86	0.27727	0.749457	209	0.306734
74	1994	0.717511	86	0.278368	0.740749	224	0.269898
74	1995	0.717511	86	0.277275	0.755337	201	0.295245
74	1996	0.717511	86	0.280294	0.74947	200	0.30961
74	1997	0.717511	86	0.278697	0.751191	212	0.315877
74	1998	0.717511	86	0.280148	0.760307	210	0.32352
74	1999	0.717511	86	0.280434	0.752368	211	0.324754
74	2000	0.717511	86	0.28126	0.75187	216	0.3327
74	2001	0.717511	86	0.279494	0.750061	225	0.30591
74	2002	0.717511	86	0.281811	0.754911	195	0.315845
74	2003	0.717511	86	0.281303	0.759762	218	0.294232
74	2004	0.717511	86	0.280511	0.759308	200	0.337533
74	2005	0.717511	86	0.280762	0.760201	217	0.316462
74	2006	0.717511	86	0.281019	0.760686	202	0.336224
74	2007	0.717511	86	0.278585	0.761665	200	0.315226
74	2008	0.717511	86	0.279363	0.762496	199	0.312605
74	2009	0.717511	86	0.285859	0.762496	199	0.308817
74	2010	0.717511	86	0.289254	0.751637	182	0.329428
75	1992	0.690748	79	0.212792	0.731922	99	0.338148
75	1993	0.690748	79	0.212379	0.732399	96	0.339938
75	1994	0.690748	79	0.214328	0.731922	99	0.341036
75	1995	0.690748	79	0.21257	0.7364	115	0.313797
75	1996	0.690748	79	0.218237	0.737401	107	0.325566
75	1997	0.690748	79	0.219873	0.736703	110	0.322542
75	1998	0.690748	79	0.223065	0.73537	118	0.311372
75	1999	0.690748	79	0.220787	0.732057	157	0.319203
75	2000	0.690748	79	0.220584	0.754889	161	0.304015
75	2001	0.690748	79	0.221076	0.76071	162	0.308571
75	2002	0.690748	79	0.224439	0.756592	171	0.298272
75	2003	0.690748	79	0.224191	0.741439	152	0.314109
75	2004	0.690748	79	0.224672	0.733006	148	0.318964
75	2005	0.690748	79	0.225	0.753912	182	0.287356
75	2006	0.690748	79	0.224941	0.768408	180	0.280546
75	2007	0.690748	79	0.228055	0.761916	165	0.318326
75	2008	0.690748	79	0.227653	0.762493	170	0.297464
75	2009	0.690748	79	0.226041	0.757212	177	0.292355
75	2010	0.690748	79	0.224356	0.766046	175	0.304751
79	1992	0.661	89	0.538206	0.740278	278	0.449216
79	1993	0.661	89	0.531751	0.740278	278	0.445055
79	1994	0.661	89	0.527708	0.755227	289	0.431321
79	1995	0.664576	87	0.52144	0.741365	276	0.44014
79	1996	0.664576	87	0.522554	0.741365	276	0.438122
79	1997	0.680457	80	0.552331	0.741365	276	0.43917
79	1998	0.680457	80	0.554579	0.741365	276	0.440554
79	1999	0.680457	80	0.554789	0.757739	283	0.430824
79	2000	0.680457	80	0.558108	0.741021	277	0.442991
79	2001	0.680457	80	0.553368	0.742754	272	0.444733
79	2002	0.680457	80	0.555086	0.757739	283	0.431891
79	2003	0.665624	87	0.529665	0.742191	278	0.44779
79	2004	0.665624	87	0.529617	0.755794	288	0.436147
79	2005	0.664276	94	0.50984	0.757221	284	0.439928
79	2006	0.67006	104	0.506375	0.754643	287	0.436472
79	2007	0.67006	104	0.505331	0.755728	284	0.440282
79	2008	0.675462	105	0.509014	0.755728	284	0.436923
79	2009	0.675462	105	0.50951	0.755728	284	0.436989
79	2010	0.675462	105	0.510034	0.755728	284	0.438783
80	1992	0.651444	91	0.492561	0.706857	132	0.471868
80	1993	0.651367	87	0.511063	0.702127	133	0.490804
80	1994	0.651367	87	0.513457	0.71347	134	0.48569
80	1995	0.651367	87	0.511953	0.707614	131	0.491741
80	1996	0.651367	87	0.50721	0.712504	136	0.484901
80	1997	0.651367	87	0.490965	0.707345	132	0.495627
80	1998	0.651367	87	0.49038	0.708579	131	0.485506
80	1999	0.651367	87	0.487236	0.707345	132	0.483655
80	2000	0.651367	87	0.491107	0.707345	132	0.498377
80	2001	0.651367	87	0.490775	0.712504	136	0.49929
80	2002	0.651139	88	0.495289	0.711992	137	0.491819
80	2003	0.650766	89	0.501351	0.729647	226	0.389206
80	2004	0.649948	94	0.499068	0.731058	247	0.390649
80	2005	0.650821	102	0.495134	0.728429	233	0.409179
80	2006	0.650821	102	0.504376	0.728866	237	0.399259
80	2007	0.650821	102	0.499808	0.729436	228	0.412636
80	2008	0.650821	102	0.49909	0.733755	241	0.390436
80	2009	0.656012	103	0.500172	0.724026	238	0.401295
80	2010	0.656161	104	0.508499	0.727318	234	0.414214
81	1992	0.753973	118	0.32509	0.766631	142	0.349182
81	1993	0.753973	118	0.326686	0.766631	142	0.359622
81	1994	0.753973	118	0.326752	0.766631	142	0.362705
81	1995	0.753973	118	0.338012	0.766631	142	0.366591
81	1996	0.751474	146	0.313244	0.767971	207	0.301522
81	1997	0.751474	146	0.31644	0.766964	213	0.291153
81	1998	0.751474	146	0.319401	0.766956	218	0.305633
81	1999	0.751474	146	0.31905	0.764158	219	0.313225
81	2000	0.751474	146	0.319546	0.769585	224	0.315187
81	2001	0.751474	146	0.320816	0.76642	225	0.324189
81	2002	0.751474	146	0.323461	0.768053	229	0.330197
81	2003	0.751474	146	0.322686	0.75706	232	0.339046
81	2004	0.751474	146	0.322452	0.750165	216	0.336686
81	2005	0.751474	146	0.32327	0.765694	242	0.333388
81	2006	0.751474	146	0.323798	0.768386	234	0.318386
81	2007	0.751474	146	0.324597	0.752202	235	0.331241
81	2008	0.751474	146	0.325576	0.768487	238	0.322229
81	2009	0.751474	146	0.325272	0.764069	245	0.320092
81	2010	0.751474	146	0.325901	0.758871	251	0.310572
83	1992	0.703832	58	0.22723	0.741244	112	0.336521
83	1993	0.703832	58	0.229408	0.741244	112	0.347434
83	1994	0.703832	58	0.228424	0.735667	124	0.306614
83	1995	0.703832	58	0.226072	0.746052	133	0.296352
83	1996	0.703832	58	0.226309	0.723144	132	0.305238
83	1997	0.703832	58	0.22713	0.729986	138	0.288858
83	1998	0.703832	58	0.227706	0.744624	116	0.325036
83	1999	0.703832	58	0.227741	0.75036	118	0.344194
83	2000	0.703832	58	0.230133	0.748496	120	0.341988
83	2001	0.703832	58	0.229483	0.748496	120	0.324369
83	2002	0.703832	58	0.22951	0.740589	116	0.307193
83	2003	0.703832	58	0.229057	0.74122	115	0.323812
83	2004	0.703832	58	0.226508	0.74122	115	0.328868
83	2005	0.703832	58	0.224507	0.700477	161	0.32458
83	2006	0.703832	58	0.223806	0.721263	161	0.314928
83	2007	0.703832	58	0.223088	0.722516	159	0.284884
83	2008	0.703832	58	0.224547	0.723067	158	0.286689
83	2009	0.703832	58	0.224658	0.723194	139	0.362964
83	2010	0.703832	58	0.225777	0.731271	139	0.363693
84	1992	0.671321	150	0.516016	0.727466	226	0.440781
84	1993	0.680641	158	0.497647	0.72476	252	0.40929
84	1994	0.679571	160	0.49712	0.728901	258	0.4066
84	1995	0.679511	158	0.495102	0.744746	262	0.399729
84	1996	0.679511	158	0.496533	0.747284	267	0.394649
84	1997	0.679511	158	0.495667	0.729803	261	0.403804
84	1998	0.670447	154	0.506971	0.746071	271	0.400005
84	1999	0.670274	152	0.509644	0.730209	261	0.416918
84	2000	0.670274	152	0.508494	0.730347	261	0.412867
84	2001	0.670274	152	0.509129	0.745645	272	0.398599
84	2002	0.670274	152	0.509253	0.731255	258	0.41951
84	2003	0.670274	152	0.508329	0.746971	273	0.403067
84	2004	0.670274	152	0.506523	0.754926	276	0.3984
84	2005	0.670274	152	0.505018	0.740752	266	0.408352
84	2006	0.676803	158	0.505639	0.743718	271	0.411081
84	2007	0.676803	158	0.505329	0.744751	268	0.413299
84	2008	0.676803	158	0.506121	0.745028	267	0.423578
84	2009	0.676803	158	0.507073	0.757139	282	0.40533
84	2010	0.676803	158	0.507511	0.75692	275	0.407647
86	1992	0.733312	137	0.426311	0.743833	180	0.43136
86	1993	0.733312	137	0.425147	0.743833	180	0.422221
86	1994	0.733312	137	0.42466	0.744216	179	0.431402
86	1995	0.733312	137	0.422178	0.742889	181	0.420046
86	1996	0.734127	136	0.419545	0.745232	182	0.407824
86	1997	0.734127	136	0.416417	0.733225	178	0.402448
86	1998	0.734127	136	0.418476	0.742233	182	0.401631
86	1999	0.734127	136	0.420431	0.743378	180	0.416493
86	2000	0.734127	136	0.414716	0.743378	180	0.407558
86	2001	0.734127	136	0.416686	0.734346	176	0.404185
86	2002	0.734127	136	0.415065	0.747156	205	0.389797
86	2003	0.734127	136	0.417452	0.751931	214	0.376599
86	2004	0.734127	136	0.413953	0.745121	223	0.384981
86	2005	0.735306	139	0.428315	0.734197	214	0.395373
86	2006	0.735306	139	0.429801	0.736017	211	0.401207
86	2007	0.735306	139	0.430823	0.747669	213	0.388805
86	2008	0.735306	139	0.427984	0.74014	200	0.391393
86	2009	0.735306	139	0.43204	0.74269	213	0.397813
86	2010	0.735306	139	0.433943	0.747092	213	0.386896
87	1992	0.71139	122	0.382971	0.71139	122	0.382971
87	1993	0.711962	121	0.381872	0.711962	121	0.381872
87	1994	0.711962	121	0.377504	0.711962	121	0.377504
87	1995	0.711962	121	0.375795	0.711962	121	0.375795
87	1996	0.711962	121	0.38033	0.711962	121	0.38033
87	1997	0.711962	121	0.380622	0.711962	121	0.380622
87	1998	0.711962	121	0.384846	0.711962	121	0.384846
87	1999	0.711962	121	0.384391	0.711962	121	0.384391
87	2000	0.711962	121	0.378313	0.711962	121	0.378313
87	2001	0.711962	121	0.384175	0.711962	121	0.384175
87	2002	0.711962	121	0.384257	0.711962	121	0.384257
87	2003	0.711962	121	0.379283	0.711962	121	0.379283
87	2004	0.711962	121	0.370623	0.711962	121	0.370623
87	2005	0.711962	121	0.370707	0.711962	121	0.370707
87	2006	0.711962	121	0.373499	0.711962	121	0.373499
87	2007	0.711962	121	0.37231	0.711962	121	0.37231
87	2008	0.711962	121	0.372657	0.711962	121	0.372657
87	2009	0.711962	121	0.377197	0.711962	121	0.377197
87	2010	0.711962	121	0.375491	0.711962	121	0.375491
88	1992	0.685779	75	0.341988	0.7187	92	0.413643
88	1993	0.685779	75	0.343094	0.7187	92	0.401207
88	1994	0.685779	75	0.346214	0.7187	92	0.402941
88	1995	0.685779	75	0.340398	0.7187	92	0.396236
88	1996	0.685779	75	0.340709	0.7187	92	0.400308
88	1997	0.685779	75	0.33924	0.7187	92	0.394925
88	1998	0.685779	75	0.338251	0.7187	92	0.399636
88	1999	0.685779	75	0.341416	0.7187	92	0.397547
88	2000	0.685779	75	0.342608	0.7187	92	0.403587
88	2001	0.685779	75	0.342911	0.7187	92	0.405816
88	2002	0.685779	75	0.343415	0.7187	92	0.411057
88	2003	0.685779	75	0.338723	0.726732	104	0.392917
88	2004	0.685779	75	0.34489	0.726732	104	0.380801
88	2005	0.685779	75	0.348099	0.700309	114	0.337658
88	2006	0.685779	75	0.345632	0.700309	114	0.334598
88	2007	0.685779	75	0.352139	0.700309	114	0.338536
88	2008	0.685779	75	0.353174	0.711104	82	0.351006
88	2009	0.685779	75	0.350452	0.711104	82	0.357479
88	2010	0.685779	75	0.350728	0.685779	75	0.350728
89	1992	0.737737	150	0.38438	0.735959	173	0.381651
89	1993	0.733453	156	0.409771	0.754329	232	0.365621
89	1994	0.733453	156	0.41033	0.749886	234	0.368666
89	1995	0.733453	156	0.411063	0.740492	243	0.350012
89	1996	0.733453	156	0.410172	0.739862	247	0.345325
89	1997	0.733453	156	0.412228	0.750392	256	0.347375
89	1998	0.733453	156	0.411813	0.738744	250	0.36294
89	1999	0.733453	156	0.412782	0.736504	247	0.370089
89	2000	0.733453	156	0.413259	0.738205	237	0.381099
89	2001	0.733453	156	0.412372	0.742541	239	0.374919
89	2002	0.733453	156	0.411961	0.734833	247	0.360367
89	2003	0.733453	156	0.411444	0.731626	242	0.374856
89	2004	0.733453	156	0.410809	0.738025	243	0.367799
89	2005	0.733453	156	0.410371	0.735814	242	0.37532
89	2006	0.733453	156	0.409086	0.732219	242	0.373029
89	2007	0.733453	156	0.410044	0.736419	247	0.376287
89	2008	0.733453	156	0.407058	0.738172	245	0.375883
89	2009	0.733453	156	0.406033	0.752755	258	0.35819
89	2010	0.733453	156	0.405332	0.747237	258	0.354951
90	1992	0.751171	105	0.321723	0.756063	116	0.381525
90	1993	0.751171	105	0.319939	0.75543	117	0.387466
90	1994	0.751171	105	0.321083	0.75543	117	0.390801
90	1995	0.751171	105	0.320142	0.762466	184	0.314363
90	1996	0.751171	105	0.320304	0.762716	201	0.275669
90	1997	0.751171	105	0.319408	0.759526	190	0.290492
90	1998	0.751171	105	0.321085	0.764187	182	0.298393
90	1999	0.751171	105	0.319217	0.751521	200	0.293243
90	2000	0.751171	105	0.31805	0.739913	192	0.298991
90	2001	0.751171	105	0.318492	0.757253	190	0.297505
90	2002	0.751171	105	0.319709	0.746778	200	0.302299
90	2003	0.750341	106	0.325629	0.743206	199	0.287717
90	2004	0.750341	106	0.325416	0.739066	196	0.293082
90	2005	0.750341	106	0.325282	0.735796	188	0.298898
90	2006	0.750341	106	0.325497	0.7529	199	0.273853
90	2007	0.750341	106	0.3252	0.752289	200	0.280456
90	2008	0.750341	106	0.326549	0.754148	174	0.329907
90	2009	0.750341	106	0.326349	0.752892	176	0.32771
90	2010	0.750341	106	0.326249	0.744977	194	0.299581
91	1992	0.702276	85	0.365581	0.733108	105	0.428458
91	1993	0.702276	85	0.365257	0.733108	105	0.430057
91	1994	0.702276	85	0.36424	0.733108	105	0.427916
91	1995	0.702276	85	0.366563	0.741495	107	0.427756
91	1996	0.702276	85	0.362928	0.734195	122	0.382804
91	1997	0.731545	114	0.4176	0.748736	225	0.349358
91	1998	0.731545	114	0.419496	0.755067	213	0.375488
91	1999	0.723319	131	0.390625	0.74667	226	0.373928
91	2000	0.730643	141	0.394121	0.749549	216	0.396887
91	2001	0.730643	141	0.40382	0.744481	224	0.392642
91	2002	0.730643	141	0.400348	0.748342	216	0.390913
91	2003	0.730643	141	0.403886	0.757555	207	0.402466
91	2004	0.730643	141	0.403752	0.754472	198	0.414884
91	2005	0.730643	141	0.406923	0.753962	207	0.40038
91	2006	0.730643	141	0.404583	0.750435	218	0.382456
91	2007	0.730643	141	0.404841	0.748275	238	0.37154
91	2008	0.730643	141	0.407909	0.749592	220	0.384234
91	2009	0.730643	141	0.401266	0.749592	220	0.380033
91	2010	0.730643	141	0.400573	0.753045	230	0.376167
93	1992	0.72309	131	0.424115	0.748955	151	0.427491
93	1993	0.72309	131	0.424261	0.748955	151	0.424198
93	1994	0.72309	131	0.426154	0.748955	151	0.431877
93	1995	0.72309	131	0.425754	0.748955	151	0.434253
93	1996	0.72309	131	0.428589	0.742186	170	0.423385
93	1997	0.72309	131	0.429368	0.728325	186	0.394717
93	1998	0.72309	131	0.430118	0.736281	195	0.398412
93	1999	0.72309	131	0.430185	0.740511	191	0.39944
93	2000	0.72309	131	0.429809	0.739584	192	0.405786
93	2001	0.72309	131	0.430318	0.74144	189	0.403035
93	2002	0.72309	131	0.429914	0.741031	190	0.398596
93	2003	0.72309	131	0.43113	0.738371	183	0.388902
93	2004	0.72309	131	0.430611	0.740667	186	0.387583
93	2005	0.72309	131	0.431177	0.743001	184	0.395072
93	2006	0.72309	131	0.430915	0.746309	175	0.406224
93	2007	0.72309	131	0.431056	0.743152	186	0.385868
93	2008	0.72309	131	0.430442	0.741436	188	0.385804
93	2009	0.72309	131	0.430286	0.736272	187	0.392391
93	2010	0.72309	131	0.430158	0.741029	189	0.383316
95	1992	0.735243	123	0.392349	0.740334	162	0.387879
95	1993	0.730827	128	0.409498	0.737014	200	0.363805
95	1994	0.730827	128	0.410085	0.734147	200	0.35678
95	1995	0.730827	128	0.408399	0.730516	203	0.353724
95	1996	0.730827	128	0.41088	0.725005	222	0.329044
95	1997	0.730827	128	0.410324	0.731816	231	0.33809
95	1998	0.730827	128	0.408107	0.721941	228	0.334152
95	1999	0.730827	128	0.407934	0.723119	228	0.356454
95	2000	0.730827	128	0.411212	0.719217	227	0.355472
95	2001	0.730827	128	0.409182	0.722986	213	0.366843
95	2002	0.730827	128	0.409886	0.727194	219	0.363543
95	2003	0.730827	128	0.409825	0.726531	232	0.350634
95	2004	0.730827	128	0.410948	0.739446	241	0.348866
95	2005	0.730827	128	0.41049	0.732364	233	0.360671
95	2006	0.730827	128	0.408526	0.74845	245	0.344566
95	2007	0.730827	128	0.407665	0.738392	222	0.379633
95	2008	0.730827	128	0.408143	0.765158	232	0.359405
95	2009	0.730827	128	0.405011	0.748708	240	0.346157
95	2010	0.730827	128	0.40557	0.745663	248	0.345131
96	1992	0	0	0	0.748098	258	0.432233
96	1993	0	0	0	0.750113	253	0.422058
96	1994	0	0	0	0.749647	254	0.416137
96	1995	0	0	0	0.749279	253	0.419195
96	1996	0	0	0	0.751672	252	0.412523
96	1997	0	0	0	0.747195	248	0.421653
96	1998	0	0	0	0.748859	256	0.404138
96	1999	0	0	0	0.746986	253	0.411633
96	2000	0	0	0	0.745832	252	0.415522
96	2001	0	0	0	0.747255	252	0.406288
96	2002	0	0	0	0.750249	257	0.410225
96	2003	0	0	0	0.750206	255	0.413961
96	2004	0	0	0	0.747641	251	0.423836
96	2005	0	0	0	0.746767	258	0.409406
96	2006	0	0	0	0.748412	250	0.41112
96	2007	0	0	0	0.747489	252	0.40586
96	2008	0	0	0	0.748273	246	0.416525
96	2009	0	0	0	0.749564	251	0.415509
96	2010	0	0	0	0.737705	238	0.431035
97	1992	0.707146	168	0.435936	0.727758	233	0.436729
97	1993	0.700365	160	0.44831	0.737707	239	0.424794
97	1994	0.699893	161	0.448394	0.748996	246	0.421394
97	1995	0.700957	160	0.44296	0.746901	239	0.426523
97	1996	0.696896	156	0.442812	0.73308	236	0.426348
97	1997	0.697423	155	0.439625	0.731508	236	0.418486
97	1998	0.697423	155	0.443652	0.720781	240	0.425035
97	1999	0.697423	155	0.444861	0.730621	238	0.434471
97	2000	0.697423	155	0.441715	0.728708	243	0.421646
97	2001	0.698502	154	0.437937	0.734486	239	0.42573
97	2002	0.698502	154	0.437374	0.746622	267	0.394548
97	2003	0.704769	164	0.437769	0.733028	242	0.438366
97	2004	0.704769	164	0.435901	0.730907	264	0.409209
97	2005	0.704769	164	0.43645	0.743304	268	0.41444
97	2006	0.704769	164	0.436447	0.726596	248	0.442913
97	2007	0.704769	164	0.433781	0.743943	266	0.414703
97	2008	0.704769	164	0.433613	0.741635	257	0.420087
97	2009	0.704769	164	0.434529	0.74439	250	0.429698
97	2010	0.704769	164	0.427938	0.755334	283	0.393716
98	1992	0.684389	102	0.562675	0.729372	235	0.380878
98	1993	0.684389	102	0.563983	0.735536	213	0.422506
98	1994	0.683964	102	0.559702	0.732098	239	0.399085
98	1995	0.68465	101	0.5586	0.732949	237	0.39776
98	1996	0.68465	101	0.563316	0.727197	241	0.406052
98	1997	0.68465	101	0.559135	0.729243	235	0.411112
98	1998	0.68465	101	0.56193	0.729523	234	0.398185
98	1999	0.684616	100	0.564605	0.728861	236	0.410437
98	2000	0.684616	100	0.566193	0.742499	227	0.437731
98	2001	0.684616	100	0.564941	0.74288	239	0.418463
98	2002	0.684616	100	0.56454	0.724645	236	0.421196
98	2003	0.684616	100	0.563754	0.728441	238	0.419176
98	2004	0.684616	100	0.560636	0.74535	262	0.400896
98	2005	0.684616	100	0.560064	0.741552	253	0.409128
98	2006	0.684616	100	0.561413	0.743931	256	0.406227
98	2007	0.684616	100	0.565167	0.74247	252	0.411668
98	2008	0.694299	102	0.560855	0.759686	271	0.385062
98	2009	0.694299	102	0.565516	0.741952	262	0.39845
98	2010	0.69717	103	0.569313	0.746756	252	0.418837
99	1992	0.890145	11	0.555929	0.728471	220	0.330681
99	1993	0.890145	11	0.571542	0.732295	221	0.32624
99	1994	0.890145	11	0.571614	0.72832	221	0.334827
99	1995	0.890145	11	0.571989	0.748971	240	0.31185
99	1996	0.890145	11	0.572735	0.747651	243	0.315809
99	1997	0.890145	11	0.574939	0.749796	246	0.314105
99	1998	0.890145	11	0.562619	0.75077	244	0.320607
99	1999	0.890145	11	0.568137	0.726658	225	0.348105
99	2000	0.890145	11	0.569954	0.729392	228	0.350006
99	2001	0.890145	11	0.574724	0.730503	226	0.355194
99	2002	0.890145	11	0.5804	0.747113	245	0.342348
99	2003	0.890145	11	0.582531	0.731036	231	0.363018
99	2004	0.890145	11	0.579761	0.729655	228	0.374557
99	2005	0.890145	11	0.576558	0.749602	245	0.361243
99	2006	0.890145	11	0.578775	0.730574	242	0.362491
99	2007	0.890145	11	0.585394	0.717761	222	0.392695
99	2008	0.890145	11	0.589217	0.740981	239	0.368702
99	2009	0.890145	11	0.596966	0.749919	246	0.365805
99	2010	0.890145	11	0.593647	0.742838	235	0.37342
100	1992	0.706024	204	0.443219	0.715239	232	0.430642
100	1993	0.706024	204	0.444516	0.727109	241	0.416014
100	1994	0.706024	204	0.443994	0.73036	244	0.416602
100	1995	0.706024	204	0.443413	0.722449	244	0.41459
100	1996	0.706024	204	0.443706	0.733885	257	0.39865
100	1997	0.706024	204	0.44346	0.733788	256	0.397864
100	1998	0.706024	204	0.4437	0.722228	250	0.413302
100	1999	0.706024	204	0.444538	0.732178	260	0.406569
100	2000	0.706024	204	0.445083	0.730622	260	0.408238
100	2001	0.706024	204	0.446144	0.729985	261	0.405463
100	2002	0.706024	204	0.44535	0.748156	274	0.40013
100	2003	0.706024	204	0.445533	0.747283	276	0.399683
100	2004	0.706024	204	0.444023	0.733215	259	0.402256
100	2005	0.706024	204	0.443528	0.734026	262	0.403809
100	2006	0.706024	204	0.444457	0.730787	255	0.413992
100	2007	0.706024	204	0.44381	0.734657	259	0.403958
100	2008	0.706024	204	0.444698	0.735942	260	0.404208
100	2009	0.706024	204	0.443701	0.732739	258	0.406793
100	2010	0.706024	204	0.444236	0.736232	259	0.408471
101	1992	0.739346	168	0.366641	0.757795	286	0.348142
101	1993	0.739346	168	0.365741	0.750605	273	0.367491
101	1994	0.739346	168	0.365558	0.757667	286	0.355417
101	1995	0.739346	168	0.365793	0.748577	279	0.367139
101	1996	0.739346	168	0.364064	0.749517	277	0.372154
101	1997	0.739346	168	0.362716	0.749687	277	0.367596
101	1998	0.739346	168	0.364263	0.750023	278	0.358045
101	1999	0.739346	168	0.363748	0.750771	274	0.370935
101	2000	0.739346	168	0.363837	0.749309	280	0.375564
101	2001	0.739346	168	0.36414	0.751533	274	0.377152
101	2002	0.739346	168	0.3652	0.750125	278	0.375211
101	2003	0.739346	168	0.364042	0.749627	277	0.38817
101	2004	0.739346	168	0.365815	0.750123	278	0.380741
101	2005	0.739346	168	0.36534	0.751123	275	0.386039
101	2006	0.739346	168	0.364761	0.750123	278	0.38184
101	2007	0.739346	168	0.365008	0.750042	276	0.382519
101	2008	0.739346	168	0.365336	0.74971	279	0.376984
101	2009	0.739346	168	0.364162	0.749501	277	0.365519
101	2010	0.739346	168	0.362614	0.759503	282	0.35513
102	1992	0.687823	185	0.460806	0.695226	192	0.468211
102	1993	0.687823	185	0.463947	0.695335	191	0.471245
102	1994	0.688492	183	0.467843	0.724303	208	0.44822
102	1995	0.688492	183	0.466484	0.700784	194	0.468708
102	1996	0.688492	183	0.467926	0.700784	194	0.467154
102	1997	0.688492	183	0.468476	0.713347	213	0.444061
102	1998	0.688492	183	0.467997	0.719841	216	0.442019
102	1999	0.688492	183	0.469863	0.71681	207	0.460438
102	2000	0.688492	183	0.469881	0.722016	207	0.466393
102	2001	0.688492	183	0.469337	0.723545	212	0.459173
102	2002	0.688492	183	0.468837	0.722539	216	0.449226
102	2003	0.688492	183	0.474668	0.726264	234	0.419955
102	2004	0.688492	183	0.475512	0.724149	222	0.459779
102	2005	0.687423	197	0.444223	0.722505	225	0.456892
102	2006	0.687423	197	0.444736	0.718387	238	0.425595
102	2007	0.687423	197	0.444366	0.734786	247	0.414611
102	2008	0.687423	197	0.445382	0.721888	233	0.434667
102	2009	0.687423	197	0.446434	0.72161	234	0.433723
102	2010	0.688492	183	0.480787	0.739764	231	0.435809
103	1992	0.69238	132	0.497059	0.72553	168	0.445488
103	1993	0.69238	132	0.492351	0.723803	160	0.446445
103	1994	0.69238	132	0.493488	0.72986	160	0.455161
103	1995	0.69238	132	0.495224	0.726398	153	0.462293
103	1996	0.69238	132	0.493542	0.723741	152	0.456099
103	1997	0.69238	132	0.492202	0.723741	152	0.451473
103	1998	0.69238	132	0.491166	0.72167	157	0.448116
103	1999	0.69238	132	0.488665	0.723741	152	0.460886
103	2000	0.69238	132	0.489431	0.723741	152	0.465313
103	2001	0.693728	130	0.489584	0.725991	156	0.448101
103	2002	0.693728	130	0.479726	0.738103	178	0.399155
103	2003	0.690935	129	0.483393	0.74038	183	0.412384
103	2004	0.689579	131	0.483707	0.731522	189	0.394634
103	2005	0.689579	131	0.483153	0.733117	192	0.423184
103	2006	0.689579	131	0.487757	0.741078	197	0.396132
103	2007	0.689579	131	0.486474	0.746778	201	0.40226
103	2008	0.69238	132	0.491682	0.746778	201	0.406908
103	2009	0.69238	132	0.488759	0.746778	201	0.400661
103	2010	0.69238	132	0.488059	0.746778	201	0.397163
104	1992	0.669683	81	0.384412	0.739801	274	0.379199
104	1993	0.671322	80	0.38022	0.754769	283	0.359195
104	1994	0.671322	80	0.380576	0.755908	280	0.361263
104	1995	0.671322	80	0.379947	0.742138	269	0.368534
104	1996	0.671322	80	0.38363	0.742979	272	0.375244
104	1997	0.671322	80	0.382505	0.742509	272	0.368118
104	1998	0.671322	80	0.379728	0.759178	282	0.359786
104	1999	0.671322	80	0.382875	0.757241	287	0.371642
104	2000	0.671322	80	0.38552	0.746198	280	0.380393
104	2001	0.671322	80	0.38616	0.7433	275	0.387481
104	2002	0.671322	80	0.383208	0.758425	281	0.376995
104	2003	0.671322	80	0.38116	0.744365	272	0.393027
104	2004	0.671322	80	0.379123	0.747743	277	0.396349
104	2005	0.671322	80	0.382768	0.746923	278	0.391147
104	2006	0.682126	84	0.386048	0.748888	278	0.401785
104	2007	0.682126	84	0.385285	0.747795	276	0.405298
104	2008	0.682126	84	0.384971	0.747795	276	0.402616
104	2009	0.682126	84	0.382288	0.748509	274	0.397322
104	2010	0.682126	84	0.38151	0.749238	273	0.40309
105	1992	0.670961	172	0.420015	0.720737	248	0.432505
105	1993	0.671318	171	0.42003	0.720737	248	0.433872
105	1994	0.671318	171	0.417074	0.72136	246	0.435091
105	1995	0.671318	171	0.417931	0.72338	241	0.436657
105	1996	0.67171	170	0.416486	0.722474	243	0.431482
105	1997	0.670006	175	0.41301	0.734243	254	0.417881
105	1998	0.670006	175	0.413479	0.722777	242	0.431158
105	1999	0.670006	175	0.417047	0.72436	250	0.430912
105	2000	0.670006	175	0.417415	0.724029	251	0.434942
105	2001	0.670006	175	0.418888	0.736742	258	0.424799
105	2002	0.670006	175	0.421472	0.724457	250	0.436199
105	2003	0.670006	175	0.421413	0.725109	248	0.435335
105	2004	0.670006	175	0.419992	0.724884	248	0.438398
105	2005	0.670006	175	0.422592	0.74636	266	0.413193
105	2006	0.670006	175	0.420289	0.746261	261	0.411702
105	2007	0.670006	175	0.420812	0.746899	260	0.419904
105	2008	0.670006	175	0.424091	0.746082	262	0.415731
105	2009	0.670006	175	0.425791	0.755754	271	0.403187
105	2010	0.670006	175	0.422537	0.737835	255	0.433527
106	1992	0.682631	170	0.497113	0.73992	282	0.418895
106	1993	0.681719	164	0.507937	0.753146	293	0.409867
106	1994	0.685916	162	0.518538	0.754624	293	0.415617
106	1995	0.683097	161	0.514134	0.753491	292	0.40998
106	1996	0.677143	158	0.517583	0.754278	294	0.407536
106	1997	0.677143	158	0.518518	0.754624	293	0.408971
106	1998	0.677143	158	0.518895	0.754624	293	0.411785
106	1999	0.676686	159	0.523139	0.754624	293	0.414006
106	2000	0.676686	159	0.522926	0.756011	294	0.419732
106	2001	0.676686	159	0.522902	0.753475	292	0.418122
106	2002	0.676351	160	0.52577	0.753475	292	0.42412
106	2003	0.674478	165	0.522066	0.754874	293	0.427999
106	2004	0.674478	165	0.521796	0.754874	293	0.426462
106	2005	0.674478	165	0.520385	0.754874	293	0.427559
106	2006	0.674478	165	0.52202	0.754874	293	0.428273
106	2007	0.674478	165	0.520704	0.754371	290	0.431287
106	2008	0.674478	165	0.521876	0.754371	290	0.432673
106	2009	0.674478	165	0.522099	0.754371	290	0.429869
106	2010	0.674478	165	0.522904	0.754371	290	0.430127
107	1992	0.750426	151	0.350857	0.740613	191	0.377439
107	1993	0.750426	151	0.350331	0.743266	191	0.377648
107	1994	0.750426	151	0.350527	0.74134	190	0.375811
107	1995	0.750426	151	0.351028	0.750369	218	0.34647
107	1996	0.746045	163	0.331737	0.751891	219	0.352441
107	1997	0.751661	172	0.334665	0.7467	253	0.371252
107	1998	0.750969	173	0.337471	0.751151	255	0.374135
107	1999	0.750969	173	0.336922	0.750816	256	0.374067
107	2000	0.750969	173	0.342059	0.75351	251	0.376859
107	2001	0.748058	181	0.337055	0.752878	257	0.378868
107	2002	0.748058	181	0.336073	0.752517	253	0.376515
107	2003	0.748058	181	0.335227	0.759977	254	0.367475
107	2004	0.748058	181	0.337505	0.761995	258	0.377655
107	2005	0.748058	181	0.336792	0.759293	266	0.366797
107	2006	0.748058	181	0.338696	0.751032	258	0.381089
107	2007	0.748058	181	0.339766	0.764082	260	0.380648
107	2008	0.748058	181	0.340048	0.753079	248	0.391486
107	2009	0.748058	181	0.339414	0.752593	252	0.370382
107	2010	0.748058	181	0.3397	0.752607	249	0.384741
108	1992	0.703748	106	0.500225	0.70236	130	0.462636
108	1993	0.703748	106	0.498312	0.701679	145	0.45008
108	1994	0.703748	106	0.494906	0.717787	150	0.442935
108	1995	0.697225	123	0.450235	0.751485	207	0.392891
108	1996	0.697225	123	0.452183	0.736276	215	0.375588
108	1997	0.697225	123	0.455721	0.733432	177	0.438057
108	1998	0.696945	131	0.440898	0.723197	194	0.408986
108	1999	0.696945	131	0.445563	0.742727	193	0.398068
108	2000	0.698335	137	0.453057	0.75004	252	0.372112
108	2001	0.702803	144	0.433104	0.755259	243	0.376407
108	2002	0.702803	144	0.432473	0.755234	243	0.381274
108	2003	0.702803	144	0.433781	0.731411	217	0.410962
108	2004	0.702803	144	0.43116	0.734401	249	0.374347
108	2005	0.702803	144	0.431724	0.73141	253	0.364039
108	2006	0.702803	144	0.426992	0.7337	237	0.380675
108	2007	0.702803	144	0.425769	0.729915	240	0.386716
108	2008	0.702803	144	0.423508	0.748699	245	0.385012
108	2009	0.702803	144	0.42573	0.746906	240	0.395694
108	2010	0.702803	144	0.426068	0.74725	239	0.392598
109	1992	0.756422	133	0.457139	0.757383	232	0.385729
109	1993	0.756422	133	0.454276	0.754661	230	0.380862
109	1994	0.756422	133	0.449674	0.75814	235	0.382092
109	1995	0.756422	133	0.453227	0.764133	230	0.389608
109	1996	0.756422	133	0.452175	0.75685	240	0.386156
109	1997	0.756422	133	0.452693	0.761427	226	0.406243
109	1998	0.756422	133	0.451076	0.763529	209	0.412947
109	1999	0.756422	133	0.454637	0.760956	233	0.397508
109	2000	0.756422	133	0.452503	0.765532	205	0.428126
109	2001	0.756422	133	0.453581	0.760012	255	0.401742
109	2002	0.756422	133	0.45054	0.754266	228	0.393295
109	2003	0.756422	133	0.451858	0.744414	221	0.398902
109	2004	0.756422	133	0.450593	0.751515	249	0.408785
109	2005	0.756422	133	0.451921	0.762021	255	0.403474
109	2006	0.756422	133	0.449829	0.761451	255	0.378502
109	2007	0.755514	134	0.455287	0.756028	253	0.393391
109	2008	0.755514	134	0.45422	0.752511	254	0.392293
109	2009	0.755514	134	0.455442	0.753125	254	0.398598
109	2010	0.755514	134	0.45608	0.762809	262	0.385852
110	1992	0.738015	140	0.49356	0.757636	283	0.428926
110	1993	0.738015	140	0.486199	0.757992	282	0.419016
110	1994	0.738644	139	0.486192	0.758402	281	0.425911
110	1995	0.738644	139	0.486443	0.758402	281	0.424423
110	1996	0.738644	139	0.487262	0.758402	281	0.421346
110	1997	0.741479	127	0.51678	0.758402	281	0.419234
110	1998	0.750057	121	0.535645	0.758839	280	0.423954
110	1999	0.74839	123	0.539028	0.758402	281	0.426586
110	2000	0.74839	123	0.539924	0.758402	281	0.430456
110	2001	0.74839	123	0.539156	0.758402	281	0.429489
110	2002	0.74839	123	0.539162	0.749212	273	0.439485
110	2003	0.744925	134	0.540192	0.747654	277	0.439855
110	2004	0.744925	134	0.540119	0.747654	277	0.442098
110	2005	0.744925	134	0.539514	0.747654	277	0.438993
110	2006	0.745522	133	0.538285	0.747654	277	0.437185
110	2007	0.745522	133	0.537474	0.749707	272	0.435999
110	2008	0.745522	133	0.537371	0.749707	272	0.436609
110	2009	0.745522	133	0.537584	0.749707	272	0.436325
110	2010	0.745522	133	0.537625	0.749707	272	0.435836
112	1992	0.659923	112	0.501704	0.738377	236	0.376698
112	1993	0.661725	128	0.455962	0.736722	225	0.380956
112	1994	0.690885	136	0.445725	0.718189	221	0.400177
112	1995	0.690885	136	0.441989	0.740236	241	0.37724
112	1996	0.695958	131	0.441951	0.73059	227	0.369189
112	1997	0.695958	131	0.446435	0.731946	223	0.40096
112	1998	0.695958	131	0.452194	0.72145	232	0.396269
112	1999	0.695958	131	0.446172	0.733474	231	0.396463
112	2000	0.695958	131	0.456338	0.731976	237	0.408345
112	2001	0.695958	131	0.454597	0.7402	224	0.407627
112	2002	0.695958	131	0.452756	0.725662	233	0.407252
112	2003	0.695958	131	0.451513	0.729702	227	0.413349
112	2004	0.695958	131	0.446657	0.728826	235	0.398363
112	2005	0.695958	131	0.448561	0.731759	238	0.39915
112	2006	0.695958	131	0.447184	0.729205	233	0.40359
112	2007	0.695958	131	0.442478	0.732933	236	0.414923
112	2008	0.670625	125	0.467031	0.735359	235	0.412267
112	2009	0.670625	125	0.465164	0.744621	250	0.392776
112	2010	0.670625	125	0.469609	0.732908	242	0.40073
113	1992	0.679419	141	0.401415	0.68288	142	0.400932
113	1993	0.678956	142	0.402871	0.688763	147	0.406478
113	1994	0.678956	142	0.405031	0.688575	148	0.415439
113	1995	0.678956	142	0.395084	0.688575	148	0.405635
113	1996	0.678956	142	0.391426	0.687022	152	0.410543
113	1997	0.678956	142	0.402813	0.687476	151	0.425367
113	1998	0.67791	143	0.407121	0.703078	207	0.378061
113	1999	0.704041	156	0.408128	0.709316	200	0.413217
113	2000	0.703089	157	0.413286	0.706138	197	0.430461
113	2001	0.703089	157	0.416175	0.719123	229	0.376786
113	2002	0.702253	158	0.425249	0.703686	217	0.408449
113	2003	0.696385	169	0.405588	0.704356	219	0.401039
113	2004	0.696385	169	0.402878	0.704443	221	0.395992
113	2005	0.694023	168	0.403654	0.712696	205	0.430302
113	2006	0.691554	167	0.406348	0.712991	211	0.417965
113	2007	0.694023	168	0.409579	0.705025	218	0.392401
113	2008	0.694023	168	0.404591	0.709396	205	0.404656
113	2009	0.694023	168	0.410348	0.709473	205	0.408399
113	2010	0.696385	169	0.408248	0.710142	203	0.394904
114	1992	0.753815	218	0.435	0.750289	244	0.414122
114	1993	0.753815	218	0.435331	0.753728	241	0.416081
114	1994	0.754634	220	0.440181	0.755334	242	0.425193
114	1995	0.754634	220	0.439477	0.753915	245	0.423607
114	1996	0.753857	221	0.438144	0.755832	246	0.402635
114	1997	0.753857	221	0.439715	0.753033	247	0.420873
114	1998	0.753857	221	0.441787	0.750454	246	0.419077
114	1999	0.753857	221	0.441538	0.754183	255	0.413144
114	2000	0.753857	221	0.442759	0.756182	250	0.425285
114	2001	0.753857	221	0.441593	0.76677	255	0.400391
114	2002	0.753857	221	0.443261	0.764835	259	0.405998
114	2003	0.753857	221	0.445716	0.765617	258	0.400252
114	2004	0.753857	221	0.44831	0.765349	263	0.402056
114	2005	0.753857	221	0.446515	0.762454	270	0.392155
114	2006	0.753857	221	0.444345	0.752898	259	0.400258
114	2007	0.753857	221	0.444454	0.753188	258	0.411978
114	2008	0.753857	221	0.448849	0.754466	255	0.418678
114	2009	0.753857	221	0.447909	0.754466	255	0.413994
114	2010	0.753857	221	0.446962	0.753682	257	0.411936
115	1992	0.719557	119	0.357104	0.742175	125	0.358414
115	1993	0.719557	119	0.359437	0.741187	126	0.359474
115	1994	0.719557	119	0.361133	0.73324	130	0.375136
115	1995	0.719557	119	0.358949	0.734592	129	0.363064
115	1996	0.719557	119	0.355513	0.747855	159	0.354052
115	1997	0.719557	119	0.357365	0.737759	142	0.373359
115	1998	0.719557	119	0.358105	0.738008	148	0.374456
115	1999	0.719557	119	0.353417	0.738797	141	0.373724
115	2000	0.719557	119	0.353832	0.75733	206	0.36051
115	2001	0.719557	119	0.353162	0.760425	194	0.346788
115	2002	0.719557	119	0.356216	0.740857	202	0.32914
115	2003	0.719557	119	0.350112	0.752495	192	0.334439
115	2004	0.719557	119	0.352205	0.740223	209	0.322623
115	2005	0.719557	119	0.348316	0.715675	186	0.338213
115	2006	0.719557	119	0.346707	0.723363	190	0.3341
115	2007	0.719557	119	0.344754	0.742516	207	0.328853
115	2008	0.719557	119	0.342817	0.742516	207	0.32959
115	2009	0.719557	119	0.342384	0.742516	207	0.332161
115	2010	0.719557	119	0.342893	0.72787	221	0.339939
116	1992	0.712192	102	0.419075	0.714989	119	0.45695
116	1993	0.712192	102	0.418498	0.71637	117	0.463761
116	1994	0.712192	102	0.418357	0.717001	116	0.463073
116	1995	0.712192	102	0.419929	0.725354	118	0.451535
116	1996	0.712192	102	0.417757	0.724843	119	0.465653
116	1997	0.712192	102	0.417675	0.724673	119	0.453735
116	1998	0.712192	102	0.416823	0.723199	121	0.461667
116	1999	0.712192	102	0.419341	0.71278	128	0.438548
116	2000	0.712192	102	0.419143	0.712285	129	0.446735
116	2001	0.712192	102	0.420219	0.711904	130	0.436865
116	2002	0.712192	102	0.421202	0.711904	130	0.439279
116	2003	0.712192	102	0.42156	0.712285	129	0.441081
116	2004	0.712192	102	0.421174	0.712285	129	0.442779
116	2005	0.712192	102	0.421149	0.712285	129	0.429913
116	2006	0.712192	102	0.421451	0.712285	129	0.428555
116	2007	0.712192	102	0.420228	0.712285	129	0.421791
116	2008	0.712192	102	0.420523	0.723199	121	0.44288
116	2009	0.712192	102	0.421363	0.723199	121	0.442531
116	2010	0.712192	102	0.421284	0.723199	121	0.444748
117	1992	0.696693	151	0.441309	0.748075	246	0.408664
117	1993	0.697963	147	0.440776	0.759009	249	0.398493
117	1994	0.698462	146	0.438729	0.763365	257	0.404674
117	1995	0.698462	146	0.438323	0.761425	254	0.397702
117	1996	0.699482	145	0.432574	0.754675	248	0.40629
117	1997	0.699482	145	0.434273	0.75371	250	0.416194
117	1998	0.699482	145	0.431503	0.754375	244	0.408743
117	1999	0.699482	145	0.431568	0.754022	245	0.42232
117	2000	0.700009	144	0.431382	0.751577	251	0.422448
117	2001	0.700009	144	0.431747	0.752745	252	0.417645
117	2002	0.700009	144	0.433412	0.7512	264	0.40731
117	2003	0.700009	144	0.432209	0.744871	274	0.395972
117	2004	0.697557	143	0.432744	0.746203	273	0.407042
117	2005	0.704051	145	0.439137	0.7472	271	0.403992
117	2006	0.704051	145	0.439386	0.7494	266	0.415263
117	2007	0.704051	145	0.43876	0.747431	266	0.400806
117	2008	0.704051	145	0.438154	0.757592	274	0.396534
117	2009	0.704051	145	0.439797	0.757592	274	0.398206
117	2010	0.704051	145	0.442451	0.75539	278	0.392502
118	1992	0.680356	89	0.366485	0.734608	206	0.433157
118	1993	0.680356	89	0.372573	0.730408	217	0.404981
118	1994	0.680356	89	0.374746	0.730969	220	0.413048
118	1995	0.680356	89	0.377767	0.730969	220	0.413619
118	1996	0.680356	89	0.374602	0.727693	218	0.405621
118	1997	0.680356	89	0.383942	0.729206	219	0.410756
118	1998	0.680356	89	0.3903	0.729206	219	0.411638
118	1999	0.680356	89	0.380807	0.727693	218	0.39764
118	2000	0.680356	89	0.379062	0.737663	222	0.438521
118	2001	0.680356	89	0.378346	0.718196	180	0.476396
118	2002	0.680356	89	0.378044	0.727208	218	0.399827
118	2003	0.680356	89	0.3802	0.725951	221	0.393973
118	2004	0.680356	89	0.382191	0.727208	218	0.402453
118	2005	0.680356	89	0.384149	0.744818	227	0.391369
118	2006	0.680356	89	0.38428	0.739437	229	0.390983
118	2007	0.680356	89	0.384081	0.742518	232	0.388637
118	2008	0.680356	89	0.387158	0.743799	229	0.379427
118	2009	0.680356	89	0.388046	0.742617	228	0.383762
118	2010	0.680356	89	0.392938	0.743799	229	0.384878
119	1992	0.677778	76	0.411676	0.711473	122	0.411388
119	1993	0.677778	76	0.425336	0.727298	220	0.375755
119	1994	0.677778	76	0.417002	0.735145	215	0.391768
119	1995	0.677778	76	0.419812	0.73554	211	0.387889
119	1996	0.677778	76	0.41995	0.733171	216	0.387596
119	1997	0.666599	86	0.42746	0.728906	224	0.400686
119	1998	0.66857	85	0.426304	0.733313	235	0.388977
119	1999	0.678186	91	0.416891	0.725987	233	0.384926
119	2000	0.678186	91	0.426829	0.724697	235	0.396695
119	2001	0.678186	91	0.434475	0.722113	242	0.397154
119	2002	0.678186	91	0.425921	0.719568	237	0.398966
119	2003	0.67696	92	0.430222	0.719118	238	0.406057
119	2004	0.675762	94	0.435481	0.720333	246	0.410081
119	2005	0.675762	94	0.441414	0.72611	241	0.424366
119	2006	0.670532	109	0.389283	0.722408	246	0.414727
119	2007	0.668576	111	0.394568	0.735886	255	0.400708
119	2008	0.6695	110	0.365167	0.738762	267	0.385765
119	2009	0.6695	110	0.365145	0.742587	267	0.394141
119	2010	0.6695	110	0.362879	0.741275	270	0.393252
120	1992	0.671121	94	0.38211	0.691342	98	0.394984
120	1993	0.671121	94	0.383699	0.693262	95	0.396941
120	1994	0.671121	94	0.384477	0.711499	128	0.347543
120	1995	0.671121	94	0.379566	0.709023	133	0.337646
120	1996	0.671121	94	0.379165	0.708656	134	0.35412
120	1997	0.671121	94	0.381153	0.702248	123	0.380417
120	1998	0.671121	94	0.383528	0.705514	131	0.345759
120	1999	0.671121	94	0.388677	0.708313	134	0.354456
120	2000	0.671121	94	0.390154	0.695439	127	0.371049
120	2001	0.671121	94	0.395133	0.695439	127	0.374839
120	2002	0.671121	94	0.394375	0.695133	128	0.379359
120	2003	0.671121	94	0.396601	0.704142	134	0.377282
120	2004	0.671121	94	0.394269	0.701361	131	0.380583
120	2005	0.671121	94	0.39546	0.701361	131	0.395897
120	2006	0.671121	94	0.392851	0.70881	152	0.357619
120	2007	0.671121	94	0.391381	0.704903	152	0.353534
120	2008	0.671121	94	0.391751	0.699778	148	0.354071
120	2009	0.671121	94	0.394075	0.704903	152	0.361471
120	2010	0.671121	94	0.393602	0.704903	152	0.363839
121	1992	0.665618	140	0.490718	0.707739	177	0.504983
121	1993	0.665618	140	0.491256	0.707739	177	0.498364
121	1994	0.665618	140	0.490304	0.722359	200	0.457724
121	1995	0.665618	140	0.49004	0.722359	200	0.460421
121	1996	0.665618	140	0.490825	0.722359	200	0.459882
121	1997	0.667769	138	0.486717	0.740227	225	0.456009
121	1998	0.671033	140	0.495461	0.734269	227	0.454888
121	1999	0.671033	140	0.49576	0.753752	236	0.437078
121	2000	0.671346	139	0.496691	0.73818	228	0.457755
121	2001	0.667482	138	0.495225	0.747793	240	0.435425
121	2002	0.667596	138	0.489719	0.759443	254	0.413897
121	2003	0.667596	138	0.487941	0.756977	251	0.42689
121	2004	0.667596	138	0.488374	0.742045	262	0.40825
121	2005	0.676916	131	0.504673	0.744468	264	0.405144
121	2006	0.667596	138	0.488615	0.733153	248	0.417525
121	2007	0.667596	138	0.487343	0.733239	246	0.412133
121	2008	0.667596	138	0.487359	0.734972	245	0.42065
121	2009	0.667596	138	0.492278	0.732557	250	0.419961
121	2010	0.667596	138	0.492589	0.733922	247	0.425649
122	1992	0.676513	54	0.275601	0.73032	100	0.396229
122	1993	0.676513	54	0.269502	0.730853	99	0.397837
122	1994	0.676513	54	0.270675	0.733192	97	0.395283
122	1995	0.676513	54	0.284875	0.733755	96	0.398849
122	1996	0.676513	54	0.275326	0.73032	100	0.398093
122	1997	0.676513	54	0.281927	0.73032	100	0.40339
122	1998	0.676513	54	0.277971	0.73032	100	0.403918
122	1999	0.676513	54	0.27436	0.73032	100	0.412429
122	2000	0.676513	54	0.277741	0.73032	100	0.41475
122	2001	0.676513	54	0.274921	0.73032	100	0.409273
122	2002	0.676513	54	0.279577	0.73032	100	0.40541
122	2003	0.676513	54	0.2822	0.730853	99	0.406651
122	2004	0.676513	54	0.283607	0.730853	99	0.403377
122	2005	0.676513	54	0.278403	0.730853	99	0.399725
122	2006	0.676513	54	0.269213	0.731387	98	0.399189
122	2007	0.676513	54	0.286214	0.731387	98	0.40676
122	2008	0.676513	54	0.280093	0.731387	98	0.404614
122	2009	0.676513	54	0.278387	0.731387	98	0.4058
122	2010	0.676513	54	0.281433	0.731387	98	0.404961
123	1992	0.725603	92	0.26805	0.753345	133	0.276969
123	1993	0.725603	92	0.267976	0.745758	132	0.280632
123	1994	0.725603	92	0.269137	0.74926	138	0.270407
123	1995	0.725603	92	0.27134	0.751624	135	0.280661
123	1996	0.725603	92	0.272344	0.754448	139	0.279742
123	1997	0.725603	92	0.269741	0.752436	134	0.278223
123	1998	0.725603	92	0.270635	0.753031	133	0.272335
123	1999	0.725603	92	0.270982	0.751624	135	0.277988
123	2000	0.725603	92	0.271216	0.751624	135	0.276915
123	2001	0.725603	92	0.270174	0.751624	135	0.278278
123	2002	0.725603	92	0.27035	0.75237	142	0.270837
123	2003	0.725603	92	0.270232	0.747867	140	0.279852
123	2004	0.725603	92	0.270529	0.750829	144	0.276421
123	2005	0.725603	92	0.271482	0.749822	146	0.289787
123	2006	0.725603	92	0.26939	0.751135	144	0.285705
123	2007	0.725603	92	0.269265	0.750348	145	0.287602
123	2008	0.725603	92	0.269666	0.750348	145	0.282772
123	2009	0.725603	92	0.26789	0.750348	145	0.282775
123	2010	0.725603	92	0.267681	0.760546	166	0.260394
124	1992	0.696027	99	0.432993	0.753639	215	0.3577
124	1993	0.696027	99	0.433803	0.753639	215	0.342323
124	1994	0.696027	99	0.434277	0.750245	213	0.351463
124	1995	0.696027	99	0.434416	0.750425	221	0.342708
124	1996	0.696027	99	0.435244	0.752533	213	0.350803
124	1997	0.696027	99	0.436416	0.742487	206	0.348994
124	1998	0.696027	99	0.436767	0.737197	219	0.33468
124	1999	0.696027	99	0.436741	0.734611	214	0.340578
124	2000	0.696027	99	0.435168	0.731822	205	0.346988
124	2001	0.696027	99	0.43389	0.726218	215	0.374402
124	2002	0.696027	99	0.435869	0.726865	197	0.397215
124	2003	0.696027	99	0.436419	0.726763	215	0.382401
124	2004	0.696027	99	0.438002	0.732111	214	0.400512
124	2005	0.696027	99	0.438412	0.735577	222	0.384924
124	2006	0.696027	99	0.439519	0.7339	222	0.37601
124	2007	0.696027	99	0.439869	0.735251	223	0.376736
124	2008	0.696027	99	0.43962	0.735251	223	0.369943
124	2009	0.696027	99	0.438354	0.735251	223	0.371603
124	2010	0.696027	99	0.439261	0.747576	231	0.362832
125	1992	0	1	0	0	1	0
125	1993	0	1	0	0	1	0
125	1994	0	1	0	0	1	0
125	1995	0	1	0	0	1	0
125	1996	0	1	0	0	1	0
125	1997	0	1	0	0	1	0
125	1998	0	1	0	0	1	0
125	1999	0	1	0	0	1	0
125	2000	0	1	0	0	1	0
125	2001	0	1	0	0	1	0
125	2002	0	1	0	0	1	0
125	2003	0	1	0	0	1	0
125	2004	0	1	0	0	1	0
125	2005	0	1	0	0	1	0
125	2006	0	1	0	0	1	0
125	2007	0	1	0	0	1	0
125	2008	0	1	0	0	1	0
125	2009	0	1	0	0	1	0
125	2010	0	1	0	0	1	0
126	1992	0.639503	67	0.433061	0.680741	121	0.435256
126	1993	0.647873	69	0.45624	0.689422	129	0.43717
126	1994	0.647873	69	0.456333	0.724683	210	0.379014
126	1995	0.647873	69	0.458526	0.736041	222	0.37201
126	1996	0.647873	69	0.464398	0.73326	224	0.375794
126	1997	0.647873	69	0.468194	0.730816	230	0.375418
126	1998	0.647873	69	0.460293	0.721716	218	0.398519
126	1999	0.644099	74	0.462527	0.72628	229	0.385973
[truncated: 2,061 more rows]
