# Supplementary material for: Commercial Plant Production and Consumption Still Follow the Latitudinal Gradient in Species Diversity despite Economic Globalization
Source: PLoS One. 2016 Oct 5;11(10):e0163002. doi: 10.1371/journal.pone.0163002 (PMC5051709; doi:10.1371/journal.pone.0163002)
Supplement: S25 File — (XLSX) [file pone.0163002.s028.xlsx]

## Sheet: PD_FAO_outputAltTen_2014-05-28
country	year	PSVP	SRP	EP	PSVC	SRC	EC
1	1992	0.669637	94	0.353802	0.662394	111	0.371565
1	1993	0.669774	93	0.340602	0.662176	111	0.365902
1	1994	0.669774	93	0.349057	0.670347	118	0.391792
1	1995	0.669774	93	0.348168	0.687603	157	0.395537
1	1996	0.666226	95	0.355763	0.715047	173	0.3745
1	1997	0.666226	95	0.357729	0.702919	154	0.416245
1	1998	0.666226	95	0.361768	0.687681	145	0.424804
1	1999	0.666226	95	0.360409	0.721618	172	0.39571
1	2000	0.666226	95	0.362345	0.723888	174	0.390522
1	2001	0.666226	95	0.363337	0.721456	179	0.376594
1	2002	0.666226	95	0.362163	0.724272	182	0.371763
1	2003	0.663291	107	0.349433	0.730988	196	0.369829
1	2004	0.663291	107	0.355001	0.731766	196	0.386044
1	2005	0.663291	107	0.354349	0.729297	216	0.361026
1	2006	0.663291	107	0.351128	0.723216	218	0.366088
1	2007	0.658982	112	0.376409	0.719949	213	0.385559
1	2008	0.658982	112	0.375174	0.737412	220	0.36726
1	2009	0.658982	112	0.374094	0.72573	205	0.384243
1	2010	0.658982	112	0.373608	0.74346	220	0.380741
2	1992	0.671294	113	0.359778	0.696305	123	0.385181
2	1993	0.671294	113	0.360797	0.704955	125	0.384866
2	1994	0.671294	113	0.361068	0.719597	134	0.379486
2	1995	0.671294	113	0.363347	0.722742	135	0.383134
2	1996	0.671294	113	0.365032	0.704506	130	0.383074
2	1997	0.671294	113	0.364497	0.703112	133	0.388046
2	1998	0.671294	113	0.365396	0.705246	129	0.381399
2	1999	0.671294	113	0.366014	0.705351	131	0.376418
2	2000	0.671294	113	0.367522	0.693564	127	0.399624
2	2001	0.671294	113	0.36653	0.697159	122	0.402491
2	2002	0.671294	113	0.364593	0.715279	139	0.393081
2	2003	0.671294	113	0.368696	0.723727	144	0.3877
2	2004	0.671294	113	0.370034	0.713968	141	0.394154
2	2005	0.671294	113	0.36829	0.711158	140	0.402786
2	2006	0.671294	113	0.366125	0.711158	140	0.406601
2	2007	0.671294	113	0.365285	0.711158	140	0.399863
2	2008	0.671294	113	0.364928	0.711158	140	0.410461
2	2009	0.671294	113	0.363161	0.689771	125	0.423617
2	2010	0.671294	113	0.364271	0.685534	124	0.408448
3	1992	0.674106	116	0.457333	0.676347	122	0.46806
3	1993	0.669872	115	0.454184	0.680371	126	0.464437
3	1994	0.665383	114	0.454167	0.680285	127	0.482644
3	1995	0.664076	115	0.458361	0.67912	128	0.485772
3	1996	0.676281	103	0.518029	0.718222	227	0.379761
3	1997	0.675848	123	0.452245	0.711092	220	0.389562
3	1998	0.676281	103	0.523051	0.704186	157	0.484154
3	1999	0.676281	103	0.523711	0.736178	244	0.378894
3	2000	0.676281	103	0.525713	0.73523	246	0.36539
3	2001	0.676281	103	0.526639	0.725201	246	0.382522
3	2002	0.675848	123	0.456197	0.727877	234	0.400053
3	2003	0.675093	124	0.457227	0.741832	238	0.396983
3	2004	0.677994	129	0.465396	0.730637	225	0.419041
3	2005	0.677994	129	0.467461	0.731309	233	0.409985
3	2006	0.675507	133	0.478525	0.715778	229	0.407303
3	2007	0.675507	133	0.480536	0.709979	232	0.405384
3	2008	0.675507	133	0.483312	0.727009	240	0.401742
3	2009	0.675507	133	0.483723	0.732331	220	0.43362
3	2010	0.675507	133	0.482853	0.712972	228	0.419729
4	1992	0.660031	118	0.471277	0.703538	205	0.399662
4	1993	0.660031	118	0.474891	0.738596	190	0.416506
4	1994	0.655592	117	0.471602	0.73199	194	0.42047
4	1995	0.660031	118	0.47094	0.738014	238	0.367035
4	1996	0.65756	120	0.47441	0.736517	212	0.405965
4	1997	0.65756	120	0.477902	0.73788	193	0.436153
4	1998	0.65756	120	0.476331	0.729909	188	0.44215
4	1999	0.65756	120	0.473503	0.72593	218	0.381406
4	2000	0.65756	120	0.47754	0.735815	208	0.402558
4	2001	0.65756	120	0.472855	0.731263	232	0.385432
4	2002	0.653188	119	0.474712	0.746302	248	0.376759
4	2003	0.653188	119	0.471506	0.743301	256	0.371814
4	2004	0.663222	121	0.472739	0.730816	243	0.389169
4	2005	0.663222	121	0.473256	0.727094	238	0.385798
4	2006	0.663222	121	0.473062	0.727528	234	0.400942
4	2007	0.663222	121	0.474	0.742838	250	0.38737
4	2008	0.663222	121	0.474073	0.748572	248	0.38697
4	2009	0.663222	121	0.472064	0.747764	252	0.387709
4	2010	0.663222	121	0.474408	0.744721	250	0.38773
5	1992	0.758104	57	0.274364	0.771807	80	0.410819
5	1993	0.758104	57	0.275041	0.773943	78	0.41814
5	1994	0.756647	58	0.27576	0.773943	78	0.411095
5	1995	0.756647	58	0.273941	0.773943	78	0.408933
5	1996	0.756647	58	0.27228	0.774546	82	0.395289
5	1997	0.756647	58	0.272377	0.774546	82	0.399163
5	1998	0.760654	56	0.369612	0.760638	99	0.397254
5	1999	0.760654	56	0.385922	0.760638	99	0.394345
5	2000	0.760654	56	0.390824	0.760638	99	0.395822
5	2001	0.760654	56	0.392666	0.760638	99	0.392176
5	2002	0.760654	56	0.393428	0.752601	105	0.367925
5	2003	0.763802	41	0.475698	0.752601	105	0.321491
5	2004	0.763802	41	0.471456	0.750506	104	0.324964
5	2005	0.763802	41	0.465618	0.753393	101	0.319997
5	2006	0.749481	62	0.347562	0.753393	101	0.332739
5	2007	0.749481	62	0.349667	0.753393	101	0.324635
5	2008	0.749481	62	0.349364	0.753393	101	0.337488
5	2009	0.749481	62	0.346197	0.753393	101	0.335388
5	2010	0.749481	62	0.347659	0.753393	101	0.347814
7	1992	0.728723	96	0.341077	0.751471	113	0.386449
7	1993	0.728723	96	0.340811	0.752386	114	0.396057
7	1994	0.728723	96	0.340718	0.752386	114	0.396564
7	1995	0.728723	96	0.341645	0.751471	113	0.391686
7	1996	0.728723	96	0.340243	0.751838	110	0.388906
7	1997	0.728723	96	0.340371	0.749899	113	0.390639
7	1998	0.728723	96	0.342072	0.749899	113	0.394168
7	1999	0.728723	96	0.338772	0.748907	112	0.382345
7	2000	0.728723	96	0.341085	0.748907	112	0.390031
7	2001	0.728723	96	0.34432	0.748907	112	0.391878
7	2002	0.728723	96	0.342979	0.767222	168	0.336429
7	2003	0.728723	96	0.341692	0.753896	163	0.333316
7	2004	0.728723	96	0.342291	0.7351	167	0.330608
7	2005	0.728723	96	0.343	0.730235	184	0.299212
7	2006	0.728723	96	0.34363	0.73858	189	0.288022
7	2007	0.728723	96	0.343905	0.753325	195	0.284353
7	2008	0.728723	96	0.341935	0.753325	195	0.284973
7	2009	0.728723	96	0.343662	0.753325	195	0.288673
7	2010	0.728723	96	0.346671	0.752645	193	0.285056
8	1992	0.707962	85	0.394979	0.725613	150	0.364663
8	1993	0.707962	85	0.39818	0.727509	143	0.388673
8	1994	0.707962	85	0.399864	0.724954	151	0.370333
8	1995	0.707962	85	0.397445	0.724494	142	0.38948
8	1996	0.707962	85	0.401909	0.724954	151	0.358188
8	1997	0.707962	85	0.40144	0.728303	152	0.362497
8	1998	0.707962	85	0.398514	0.738374	138	0.402622
8	1999	0.707962	85	0.402298	0.736382	149	0.396724
8	2000	0.707962	85	0.391637	0.732465	149	0.411644
8	2001	0.707962	85	0.400429	0.727086	142	0.426091
8	2002	0.707962	85	0.397983	0.736382	149	0.39347
8	2003	0.707962	85	0.397373	0.739573	141	0.409654
8	2004	0.707962	85	0.397548	0.736382	149	0.404659
8	2005	0.707962	85	0.394343	0.740895	237	0.37907
8	2006	0.707962	85	0.393295	0.739202	200	0.371014
8	2007	0.707962	85	0.394475	0.756815	192	0.399482
8	2008	0.707962	85	0.392431	0.756815	192	0.396159
8	2009	0.707962	85	0.392801	0.755063	191	0.39093
8	2010	0.707962	85	0.397075	0.73994	181	0.401361
9	1992	0.73803	143	0.544624	0.742972	244	0.415334
9	1993	0.73803	143	0.546277	0.740077	243	0.42721
9	1994	0.73803	143	0.543258	0.736302	237	0.431768
9	1995	0.73803	143	0.541235	0.739754	233	0.437464
9	1996	0.73803	143	0.539057	0.742151	236	0.429869
9	1997	0.73803	143	0.542565	0.737649	238	0.429759
9	1998	0.73803	143	0.541877	0.741881	242	0.425453
9	1999	0.73803	143	0.543875	0.736104	242	0.440825
9	2000	0.73803	143	0.545979	0.742489	235	0.444307
9	2001	0.73803	143	0.547375	0.737758	249	0.41905
9	2002	0.73803	143	0.549401	0.742644	223	0.439963
9	2003	0.73803	143	0.549341	0.741172	229	0.428807
9	2004	0.73803	143	0.544733	0.737878	227	0.430884
9	2005	0.73803	143	0.544083	0.740924	230	0.430271
9	2006	0.73803	143	0.544164	0.742695	225	0.443905
9	2007	0.73803	143	0.543631	0.748683	217	0.457789
9	2008	0.73803	143	0.54329	0.744522	222	0.438029
9	2009	0.73803	143	0.544332	0.751929	223	0.437583
9	2010	0.73803	143	0.54049	0.740854	230	0.430966
10	1992	0.692472	166	0.477247	0.748569	279	0.411214
10	1993	0.692472	166	0.480659	0.738012	272	0.421115
10	1994	0.6961	161	0.483242	0.738714	271	0.425244
10	1995	0.6961	161	0.480238	0.724058	262	0.435022
10	1996	0.6961	161	0.480216	0.739567	269	0.417456
10	1997	0.6961	161	0.480103	0.739216	271	0.418618
10	1998	0.6961	161	0.481794	0.727819	263	0.433071
10	1999	0.6961	161	0.481206	0.724077	262	0.435258
10	2000	0.6961	161	0.48122	0.724886	260	0.432478
10	2001	0.6961	161	0.481396	0.725709	263	0.434386
10	2002	0.6961	161	0.484614	0.736329	269	0.430099
10	2003	0.6961	161	0.483132	0.738338	268	0.434281
10	2004	0.6961	161	0.486221	0.730357	261	0.452145
10	2005	0.6961	161	0.483545	0.743435	273	0.425279
10	2006	0.6961	161	0.486617	0.751676	276	0.431105
10	2007	0.6961	161	0.488112	0.739928	268	0.434043
10	2008	0.6961	161	0.491853	0.744695	265	0.440282
10	2009	0.6961	161	0.488609	0.745137	264	0.439887
10	2010	0.6961	161	0.487405	0.744695	265	0.439971
11	1992	0.664682	92	0.478107	0.75098	282	0.404704
11	1993	0.664682	92	0.478764	0.736893	277	0.407684
11	1994	0.664682	92	0.480942	0.738797	277	0.407429
11	1995	0.675746	95	0.500934	0.742897	280	0.416962
11	1996	0.707666	105	0.481513	0.755151	284	0.41999
11	1997	0.707666	105	0.481091	0.74158	279	0.427244
11	1998	0.706435	107	0.48265	0.740228	278	0.425789
11	1999	0.706435	107	0.485561	0.756045	290	0.414686
11	2000	0.706435	107	0.490483	0.753745	288	0.417043
11	2001	0.706435	107	0.483724	0.753745	288	0.420934
11	2002	0.706435	107	0.487768	0.754913	289	0.423218
11	2003	0.695309	127	0.477582	0.755242	287	0.436799
11	2004	0.695309	127	0.475338	0.755242	287	0.442379
11	2005	0.695309	127	0.475678	0.75386	291	0.437254
11	2006	0.695309	127	0.475419	0.754996	292	0.440372
11	2007	0.695309	127	0.476283	0.75491	288	0.440742
11	2008	0.695738	126	0.470507	0.75491	288	0.444103
11	2009	0.695738	126	0.467377	0.75491	288	0.445243
11	2010	0.698207	127	0.473949	0.75491	288	0.440596
12	1992	0.680661	51	0.346981	0.744354	190	0.342767
12	1993	0.680661	51	0.348587	0.741868	185	0.352715
12	1994	0.680661	51	0.352182	0.729909	183	0.366493
12	1995	0.680661	51	0.355329	0.722271	175	0.368378
12	1996	0.680661	51	0.352239	0.722271	175	0.361378
12	1997	0.680661	51	0.35599	0.749534	230	0.381611
12	1998	0.680661	51	0.353992	0.752812	215	0.386103
12	1999	0.680661	51	0.354123	0.751189	214	0.36657
12	2000	0.680661	51	0.351415	0.720899	248	0.401429
12	2001	0.680661	51	0.35118	0.733859	247	0.401561
12	2002	0.680661	51	0.353027	0.7128	191	0.388717
12	2003	0.680661	51	0.354467	0.705692	184	0.363909
12	2004	0.680661	51	0.354614	0.708636	192	0.363757
12	2005	0.680661	51	0.353981	0.733239	249	0.387015
12	2006	0.680661	51	0.353194	0.72243	243	0.398731
12	2007	0.680661	51	0.353203	0.733609	248	0.386984
12	2008	0.680661	51	0.354794	0.735784	247	0.395766
12	2009	0.680661	51	0.355233	0.735485	249	0.401033
12	2010	0.680661	51	0.357711	0.726109	240	0.401953
13	1992	0.625768	89	0.325626	0.721374	177	0.397251
13	1993	0.625768	89	0.322831	0.721374	177	0.398348
13	1994	0.625768	89	0.323768	0.721374	177	0.397798
13	1995	0.625768	89	0.320701	0.721374	177	0.389562
13	1996	0.625859	88	0.310154	0.721945	176	0.38418
13	1997	0.625859	88	0.307412	0.720268	178	0.428261
13	1998	0.624375	89	0.316034	0.719176	168	0.405038
13	1999	0.624375	89	0.317346	0.722856	172	0.408531
13	2000	0.624375	89	0.322466	0.745334	218	0.425984
13	2001	0.624375	89	0.318298	0.747221	219	0.438361
13	2002	0.624375	89	0.320974	0.755122	224	0.426121
13	2003	0.624375	89	0.314262	0.751623	233	0.424759
13	2004	0.624375	89	0.322777	0.753382	233	0.42541
13	2005	0.624644	90	0.330649	0.754165	240	0.430288
13	2006	0.624644	90	0.328522	0.750924	229	0.42209
13	2007	0.624644	90	0.327127	0.750139	243	0.417589
13	2008	0.624644	90	0.328537	0.750139	243	0.430863
13	2009	0.624644	90	0.328725	0.751695	246	0.40987
13	2010	0.624644	90	0.331531	0.75278	243	0.420468
14	1992	0.704239	102	0.282226	0.747649	224	0.353622
14	1993	0.701749	105	0.30443	0.763469	237	0.349572
14	1994	0.701749	105	0.300183	0.762525	239	0.351858
14	1995	0.701749	105	0.302394	0.763611	237	0.353767
14	1996	0.701749	105	0.299162	0.753909	240	0.355407
14	1997	0.701749	105	0.299776	0.7512	241	0.360625
14	1998	0.701749	105	0.318195	0.754407	234	0.345721
14	1999	0.701749	105	0.314056	0.756683	245	0.357351
14	2000	0.701749	105	0.316307	0.740258	229	0.371186
14	2001	0.701749	105	0.318403	0.75468	243	0.402465
14	2002	0.701749	105	0.313839	0.753763	245	0.399969
14	2003	0.701749	105	0.321098	0.752929	244	0.405664
14	2004	0.701749	105	0.31741	0.753325	243	0.37877
14	2005	0.701749	105	0.316363	0.750434	254	0.390884
14	2006	0.701749	105	0.316437	0.752648	254	0.382242
14	2007	0.701749	105	0.313244	0.752101	256	0.383064
14	2008	0.701749	105	0.313102	0.753308	252	0.38445
14	2009	0.701749	105	0.318858	0.752089	255	0.385916
14	2010	0.701749	105	0.320509	0.749766	251	0.392176
15	1992	0.67705	90	0.49678	0.753974	287	0.405047
15	1993	0.67705	90	0.499673	0.754198	282	0.40656
15	1994	0.67705	90	0.49331	0.75627	289	0.404651
15	1995	0.67705	90	0.493893	0.756529	284	0.406821
15	1996	0.67705	90	0.49266	0.75512	288	0.403827
15	1997	0.67705	90	0.486758	0.75512	288	0.404168
15	1998	0.67705	90	0.489455	0.75627	289	0.406495
15	1999	0.67705	90	0.488091	0.756563	288	0.407932
16	1992	0.72406	176	0.403487	0.740713	237	0.388746
16	1993	0.72406	176	0.401805	0.743214	234	0.388267
16	1994	0.72406	176	0.406892	0.733463	238	0.388485
16	1995	0.72406	176	0.404326	0.748697	247	0.38512
16	1996	0.72406	176	0.405609	0.732365	243	0.388552
16	1997	0.72406	176	0.406357	0.730184	241	0.385124
16	1998	0.72406	176	0.407469	0.732497	240	0.398905
16	1999	0.72406	176	0.406641	0.732956	228	0.396944
16	2000	0.72406	176	0.406524	0.730555	229	0.39384
16	2001	0.72406	176	0.406124	0.730624	230	0.403694
16	2002	0.72406	176	0.406163	0.748345	260	0.391612
16	2003	0.72406	176	0.406155	0.747019	248	0.407924
16	2004	0.72406	176	0.405936	0.730551	244	0.407879
16	2005	0.722948	177	0.411349	0.750511	259	0.380995
16	2006	0.722948	177	0.413256	0.734433	243	0.412624
16	2007	0.722948	177	0.413722	0.735679	242	0.411545
16	2008	0.722948	177	0.411245	0.737392	238	0.423318
16	2009	0.722948	177	0.411667	0.736975	239	0.418729
16	2010	0.722948	177	0.410854	0.733751	236	0.417819
17	1992	0.616385	40	0.317238	0.675618	95	0.385386
17	1993	0.616385	40	0.324166	0.675618	95	0.385042
17	1994	0.616385	40	0.32818	0.675618	95	0.380943
17	1995	0.616385	40	0.329403	0.675618	95	0.385574
17	1996	0.616385	40	0.332862	0.675618	95	0.384215
17	1997	0.616385	40	0.332459	0.675618	95	0.383111
17	1998	0.616385	40	0.323464	0.675618	95	0.382641
17	1999	0.616385	40	0.323077	0.674933	96	0.392741
17	2000	0.616385	40	0.323889	0.674933	96	0.394811
17	2001	0.616385	40	0.324286	0.674933	96	0.396097
17	2002	0.616385	40	0.327776	0.674933	96	0.395343
17	2003	0.616385	40	0.326445	0.674933	96	0.386402
17	2004	0.616385	40	0.322264	0.674933	96	0.376794
17	2005	0.616385	40	0.330001	0.674933	96	0.381622
17	2006	0.616385	40	0.328427	0.674933	96	0.392599
17	2007	0.616385	40	0.327353	0.70035	108	0.35242
17	2008	0.616385	40	0.331218	0.695751	107	0.364087
17	2009	0.616385	40	0.331032	0.695751	107	0.361239
17	2010	0.616385	40	0.33434	0.695751	107	0.376073
18	1992	0.737531	102	0.323857	0.743536	124	0.381475
18	1993	0.737531	102	0.324492	0.735614	170	0.321999
18	1994	0.737531	102	0.323398	0.734967	177	0.32833
18	1995	0.737531	102	0.322129	0.738147	171	0.320388
18	1996	0.737531	102	0.323254	0.73619	175	0.322335
18	1997	0.737531	102	0.322255	0.744748	147	0.375995
18	1998	0.737531	102	0.32276	0.744583	142	0.364473
18	1999	0.734822	106	0.354561	0.741653	146	0.392092
18	2000	0.734822	106	0.359751	0.741653	146	0.399275
18	2001	0.734822	106	0.358805	0.745144	134	0.419574
18	2002	0.734822	106	0.357423	0.745144	134	0.418532
18	2003	0.737255	118	0.394893	0.740865	142	0.443695
18	2004	0.735351	129	0.422981	0.739506	150	0.453188
18	2005	0.735351	129	0.425915	0.73919	151	0.457958
18	2006	0.735351	129	0.425371	0.74117	148	0.454759
18	2007	0.735351	129	0.424696	0.740884	149	0.457073
18	2008	0.735351	129	0.424554	0.740884	149	0.45695
18	2009	0.734836	130	0.427787	0.740422	150	0.460848
18	2010	0.734836	130	0.430176	0.730268	193	0.446629
19	1992	0.712346	147	0.466603	0.710327	194	0.408833
19	1993	0.712346	147	0.466722	0.708532	203	0.397851
19	1994	0.712346	147	0.466424	0.731614	224	0.366239
19	1995	0.712346	147	0.466665	0.72366	226	0.356294
19	1996	0.712346	147	0.465551	0.72889	229	0.3587
19	1997	0.712346	147	0.468596	0.710039	201	0.411683
19	1998	0.712346	147	0.469495	0.708341	205	0.398039
19	1999	0.712346	147	0.468846	0.706847	204	0.404164
19	2000	0.712346	147	0.468981	0.740565	249	0.355255
19	2001	0.712346	147	0.466832	0.743763	245	0.355714
19	2002	0.712346	147	0.46776	0.753463	238	0.364314
19	2003	0.712346	147	0.46615	0.737675	228	0.37635
19	2004	0.712346	147	0.462683	0.732568	216	0.390192
19	2005	0.712346	147	0.461871	0.713529	204	0.4133
19	2006	0.712346	147	0.458958	0.71347	218	0.386246
19	2007	0.712346	147	0.459588	0.737924	213	0.395293
19	2008	0.712346	147	0.459829	0.732839	210	0.405639
19	2009	0.712346	147	0.459011	0.72666	227	0.362269
19	2010	0.712346	147	0.460638	0.746091	220	0.387628
20	1992	0.705869	85	0.287811	0.747573	253	0.371644
20	1993	0.705869	85	0.29181	0.746259	247	0.381064
20	1994	0.705869	85	0.291025	0.749114	248	0.375691
20	1995	0.705869	85	0.284885	0.750577	245	0.375573
20	1996	0.705869	85	0.281267	0.733875	241	0.371282
20	1997	0.705869	85	0.279522	0.756128	265	0.366385
20	1998	0.705869	85	0.279772	0.748303	251	0.390709
20	1999	0.705869	85	0.280017	0.747235	256	0.389532
20	2000	0.705869	85	0.27462	0.7478	255	0.391883
20	2001	0.705869	85	0.263412	0.73267	246	0.407492
20	2002	0.705869	85	0.268153	0.747332	260	0.421555
20	2003	0.705869	85	0.271063	0.735097	230	0.446373
20	2004	0.705869	85	0.271525	0.727503	214	0.44153
20	2005	0.705869	85	0.268328	0.72598	219	0.419429
20	2006	0.705869	85	0.271534	0.72377	217	0.423674
20	2007	0.705869	85	0.268941	0.74144	231	0.412944
20	2008	0.705869	85	0.269239	0.757428	237	0.410963
20	2009	0.695861	82	0.266408	0.747632	240	0.408848
20	2010	0.695861	82	0.280097	0.758097	238	0.404957
21	1992	0.742485	171	0.440921	0.756242	260	0.369592
21	1993	0.742485	171	0.443124	0.753557	269	0.367579
21	1994	0.742485	171	0.439049	0.753357	278	0.368588
21	1995	0.742485	171	0.436857	0.753005	285	0.375829
21	1996	0.742485	171	0.438867	0.754458	285	0.37812
21	1997	0.742485	171	0.439427	0.751293	277	0.386612
21	1998	0.742485	171	0.439081	0.751293	277	0.392101
21	1999	0.742485	171	0.435262	0.751194	271	0.385077
21	2000	0.742485	171	0.435489	0.753997	265	0.395819
21	2001	0.742485	171	0.434991	0.757073	261	0.393695
21	2002	0.742485	171	0.435059	0.754772	266	0.393379
21	2003	0.742485	171	0.43548	0.750712	268	0.391669
21	2004	0.742485	171	0.434266	0.751913	274	0.384481
21	2005	0.744122	172	0.439099	0.75086	269	0.385885
21	2006	0.744122	172	0.438441	0.752823	274	0.390215
21	2007	0.744122	172	0.436718	0.749651	268	0.388361
21	2008	0.744122	172	0.434516	0.749651	268	0.384459
21	2009	0.744122	172	0.434619	0.754099	266	0.389283
21	2010	0.744122	172	0.437655	0.749651	268	0.393832
22	1992	NA	NA	NA	0.71984	143	0.348982
22	1993	NA	NA	NA	0.7127	159	0.316288
22	1994	NA	NA	NA	0.714847	156	0.326041
22	1995	NA	NA	NA	0.705991	151	0.319629
22	1996	NA	NA	NA	0.713705	141	0.326924
22	1997	NA	NA	NA	0.729123	133	0.349179
22	1998	NA	NA	NA	0.727756	142	0.317744
22	1999	NA	NA	NA	0.722513	100	0.386366
22	2000	NA	NA	NA	0.725239	107	0.351543
22	2001	NA	NA	NA	0.715397	100	0.383443
22	2002	NA	NA	NA	0.716228	100	0.379094
22	2003	NA	NA	NA	0.719563	97	0.372966
22	2004	NA	NA	NA	0.704279	83	0.386502
22	2005	NA	NA	NA	0.703584	84	0.379124
22	2006	NA	NA	NA	0.712463	94	0.356839
22	2007	NA	NA	NA	0.712105	95	0.363927
22	2008	NA	NA	NA	0.712929	94	0.37248
22	2009	NA	NA	NA	0.745653	217	0.372237
22	2010	NA	NA	NA	0.746159	220	0.378835
23	1992	0.737427	94	0.385019	0.756788	172	0.391296
23	1993	0.735738	95	0.391699	0.744842	193	0.3413
23	1994	0.735738	95	0.370946	0.757125	194	0.333503
23	1995	0.746112	99	0.371722	0.76171	182	0.369497
23	1996	0.746112	99	0.366212	0.752582	195	0.33445
23	1997	0.746112	99	0.360035	0.762927	183	0.361117
23	1998	0.743112	102	0.364261	0.759393	160	0.402508
23	1999	0.736587	108	0.37734	0.75925	176	0.384847
23	2000	0.736587	108	0.383897	0.757968	193	0.376774
23	2001	0.736587	108	0.389642	0.753953	159	0.401556
23	2002	0.736587	108	0.393383	0.747005	161	0.385294
23	2003	0.736587	108	0.405014	0.75366	201	0.394215
23	2004	0.736587	108	0.389797	0.738068	197	0.371197
23	2005	0.736587	108	0.393758	0.753664	210	0.356339
23	2006	0.736587	108	0.39675	0.759497	195	0.378719
23	2007	0.736587	108	0.387711	0.759455	191	0.380528
23	2008	0.736587	108	0.396259	0.768864	195	0.368335
23	2009	0.736587	108	0.392367	0.776955	181	0.392088
23	2010	0.736587	108	0.391008	0.758865	204	0.362466
25	1992	0.723581	88	0.192591	0.740011	108	0.331177
25	1993	0.723581	88	0.191113	0.738965	105	0.323159
25	1994	0.723581	88	0.192559	0.742329	106	0.315155
25	1995	0.723581	88	0.192138	0.738965	105	0.326189
25	1996	0.723581	88	0.192716	0.742329	106	0.295728
25	1997	0.723581	88	0.194321	0.742329	106	0.332521
25	1998	0.723581	88	0.195863	0.742329	106	0.287614
25	1999	0.723581	88	0.196233	0.738965	105	0.331266
25	2000	0.723581	88	0.195091	0.742329	106	0.316793
25	2001	0.723581	88	0.195448	0.742329	106	0.287449
25	2002	0.723581	88	0.196507	0.75275	148	0.289798
25	2003	0.723581	88	0.197032	0.7367	145	0.28432
25	2004	0.723581	88	0.197435	0.744679	144	0.307522
25	2005	0.723581	88	0.197117	0.735516	161	0.298545
25	2006	0.723581	88	0.196761	0.72777	166	0.293567
25	2007	0.723581	88	0.196759	0.72883	177	0.265042
25	2008	0.723581	88	0.196942	0.7308	174	0.258968
25	2009	0.723581	88	0.197216	0.7308	174	0.262327
25	2010	0.723581	88	0.196627	0.73319	151	0.287573
26	1992	0.720746	80	0.413672	0.731225	215	0.340629
26	1993	0.720746	80	0.416347	0.732873	211	0.343637
26	1994	0.720746	80	0.415453	0.734214	222	0.360345
26	1995	0.720746	80	0.418468	0.73212	221	0.349163
26	1996	0.720746	80	0.421346	0.730666	223	0.368529
26	1997	0.720746	80	0.418109	0.73592	241	0.410535
26	1998	0.720746	80	0.41744	0.73592	241	0.40592
26	1999	0.720746	80	0.422052	0.733866	225	0.390038
26	2000	0.720746	80	0.420995	0.732129	224	0.383393
26	2001	0.720746	80	0.422037	0.733866	225	0.386269
26	2002	0.720746	80	0.418285	0.735393	243	0.424883
26	2003	0.720746	80	0.417835	0.752165	250	0.405422
26	2004	0.720746	80	0.419673	0.761502	259	0.385164
26	2005	0.720746	80	0.418563	0.763883	253	0.389449
26	2006	0.720746	80	0.415571	0.761575	255	0.367202
26	2007	0.720746	80	0.402315	0.762396	257	0.367638
26	2008	0.720746	80	0.403629	0.762396	257	0.363899
26	2009	0.720746	80	0.402797	0.762396	257	0.368472
26	2010	0.720746	80	0.405672	0.763451	247	0.376539
27	1992	0.696249	146	0.452067	0.732315	215	0.420334
27	1993	0.700166	163	0.432729	0.724829	241	0.414875
27	1994	0.703774	163	0.441883	0.732029	250	0.395149
27	1995	0.702968	165	0.440985	0.730832	250	0.401096
27	1996	0.703765	163	0.440681	0.734389	226	0.430469
27	1997	0.703372	163	0.440572	0.73222	238	0.409168
27	1998	0.703765	163	0.444538	0.731142	241	0.408737
27	1999	0.703765	163	0.444869	0.733828	236	0.414913
27	2000	0.703765	163	0.447382	0.730949	238	0.420134
27	2001	0.702865	164	0.450622	0.723711	254	0.411536
27	2002	0.702865	164	0.448837	0.73431	255	0.412896
27	2003	0.702219	166	0.454911	0.733971	247	0.427331
27	2004	0.702219	166	0.452798	0.724398	239	0.442395
27	2005	0.702219	166	0.452548	0.729705	239	0.444902
27	2006	0.694275	175	0.437378	0.741111	269	0.409772
27	2007	0.694275	175	0.439073	0.739766	273	0.414924
27	2008	0.694465	174	0.424652	0.741906	267	0.420685
27	2009	0.693905	176	0.434139	0.756402	279	0.418647
27	2010	0.693905	176	0.431631	0.743848	276	0.416154
28	1992	0.736285	114	0.399594	0.740282	122	0.393248
28	1993	0.736285	114	0.399766	0.740065	123	0.401402
28	1994	0.736285	114	0.400498	0.745143	123	0.39975
28	1995	0.736285	114	0.397033	0.747369	125	0.400788
28	1996	0.736285	114	0.392651	0.777889	173	0.341075
28	1997	0.736285	114	0.394807	0.776516	173	0.338028
28	1998	0.736285	114	0.396422	0.773829	172	0.342252
28	1999	0.736285	114	0.398094	0.775334	173	0.351908
28	2000	0.736285	114	0.399432	0.778712	164	0.358713
28	2001	0.736285	114	0.400629	0.778712	164	0.356884
28	2002	0.736285	114	0.402323	0.777849	176	0.342035
28	2003	0.736285	114	0.40312	0.776941	180	0.341379
28	2004	0.736285	114	0.401715	0.779096	177	0.335382
28	2005	0.736285	114	0.400694	0.752982	155	0.370388
28	2006	0.736285	114	0.401146	0.774906	153	0.378397
28	2007	0.736285	114	0.401361	0.776534	166	0.371437
28	2008	0.736285	114	0.40007	0.777851	173	0.350762
28	2009	0.736285	114	0.396239	0.781001	171	0.343988
28	2010	0.736285	114	0.394769	0.780292	173	0.345617
29	1992	0.755583	88	0.353564	0.756632	92	0.373225
29	1993	0.755583	88	0.350864	0.754199	95	0.376184
29	1994	0.755583	88	0.354131	0.754199	95	0.39434
29	1995	0.755583	88	0.353647	0.756632	92	0.37739
29	1996	0.755583	88	0.354187	0.754199	95	0.383355
29	1997	0.755583	88	0.35439	0.756942	91	0.368552
29	1998	0.755583	88	0.352631	0.754207	124	0.301632
29	1999	0.755583	88	0.353927	0.759422	129	0.301711
29	2000	0.755583	88	0.354118	0.763416	128	0.309602
29	2001	0.755583	88	0.356687	0.762194	136	0.298629
29	2002	0.755583	88	0.356784	0.758123	135	0.327858
29	2003	0.755583	88	0.353957	0.753871	125	0.32554
29	2004	0.755583	88	0.351458	0.763919	133	0.323139
29	2005	0.755583	88	0.344757	0.75032	126	0.329072
29	2006	0.755583	88	0.343973	0.757369	135	0.333072
29	2007	0.755583	88	0.344555	0.764952	147	0.298379
29	2008	0.755583	88	0.341156	0.745484	147	0.277836
29	2009	0.755583	88	0.344869	0.752732	149	0.311802
29	2010	0.755583	88	0.343589	0.74763	172	0.28546
32	1992	0.743324	175	0.357646	0.751545	216	0.342572
32	1993	0.743324	175	0.358977	0.739897	216	0.353306
32	1994	0.743324	175	0.364658	0.747517	228	0.341023
32	1995	0.743324	175	0.366066	0.752002	227	0.335938
32	1996	0.743324	175	0.365784	0.752768	225	0.344367
32	1997	0.743324	175	0.366113	0.752516	226	0.335524
32	1998	0.743324	175	0.368254	0.755622	219	0.361057
32	1999	0.743324	175	0.366998	0.752161	230	0.355887
32	2000	0.743324	175	0.366755	0.752754	229	0.352377
32	2001	0.743324	175	0.367214	0.752904	231	0.351191
32	2002	0.743324	175	0.36716	0.76411	235	0.343963
32	2003	0.743324	175	0.367595	0.751056	229	0.358132
32	2004	0.743324	175	0.368306	0.753185	215	0.375902
32	2005	0.743324	175	0.366316	0.765003	228	0.354428
32	2006	0.743324	175	0.368012	0.754152	226	0.358256
32	2007	0.743324	175	0.368615	0.758821	231	0.351712
32	2008	0.743324	175	0.370888	0.76323	240	0.348011
32	2009	0.743324	175	0.372085	0.755376	227	0.367756
32	2010	0.743324	175	0.371112	0.753414	233	0.35604
33	1992	0.705831	92	0.532976	0.740713	273	0.438196
33	1993	0.70977	100	0.524198	0.740713	273	0.444195
33	1994	0.70977	100	0.527417	0.740713	273	0.443099
33	1995	0.70977	100	0.529074	0.740713	273	0.44376
33	1996	0.708721	101	0.531539	0.740713	273	0.446042
33	1997	0.708721	101	0.531402	0.740713	273	0.445886
33	1998	0.708721	101	0.530814	0.740364	274	0.446274
33	1999	0.708721	101	0.532738	0.740364	274	0.448189
33	2000	0.705777	106	0.522303	0.740751	273	0.447242
33	2001	0.702966	111	0.50755	0.740751	273	0.446162
33	2002	0.702394	123	0.469984	0.741103	272	0.449641
33	2003	0.702394	123	0.467202	0.741103	272	0.449997
33	2004	0.702394	123	0.466618	0.741103	272	0.449348
33	2005	0.702394	123	0.468112	0.741103	272	0.449352
33	2006	0.702394	123	0.469184	0.741103	272	0.450216
33	2007	0.702394	123	0.466772	0.741189	266	0.449566
33	2008	0.707305	122	0.46089	0.741189	266	0.453778
33	2009	0.707305	122	0.463513	0.741189	266	0.454897
33	2010	0.707305	122	0.463604	0.741189	266	0.454132
35	1992	0.648289	83	0.356898	0.744219	158	0.362036
35	1993	0.648289	83	0.364435	0.744219	158	0.363808
35	1994	0.648289	83	0.373218	0.735321	177	0.347171
35	1995	0.648289	83	0.371004	0.738005	178	0.353395
35	1996	0.648289	83	0.387516	0.736317	180	0.362522
35	1997	0.648289	83	0.389955	0.739847	179	0.371783
35	1998	0.648289	83	0.391275	0.739525	210	0.344597
35	1999	0.648289	83	0.382283	0.738916	206	0.36313
35	2000	0.648289	83	0.381625	0.735974	207	0.363206
35	2001	0.648289	83	0.384296	0.735974	207	0.360973
35	2002	0.648289	83	0.389861	0.735277	203	0.36264
35	2003	0.648289	83	0.387011	0.741406	206	0.350373
35	2004	0.648289	83	0.387893	0.732949	214	0.336822
35	2005	0.648289	83	0.387086	0.740778	212	0.366104
35	2006	0.648289	83	0.38635	0.745286	217	0.362673
35	2007	0.648289	83	0.385492	0.744846	218	0.359899
35	2008	0.648289	83	0.38268	0.747108	217	0.372051
35	2009	0.648289	83	0.381004	0.740756	231	0.36693
35	2010	0.648289	83	0.383951	0.736687	230	0.370025
36	1992	0.744315	49	0.421733	0.76371	95	0.372528
36	1993	0.744315	49	0.435922	0.76371	95	0.370079
36	1994	0.744315	49	0.434879	0.76371	95	0.375599
36	1995	0.744315	49	0.430897	0.76371	95	0.377599
36	1996	0.744315	49	0.420657	0.76371	95	0.371141
36	1997	0.744315	49	0.411144	0.76371	95	0.364056
36	1998	0.744315	49	0.426738	0.76371	95	0.37664
36	1999	0.744315	49	0.425028	0.76371	95	0.361679
36	2000	0.744315	49	0.444699	0.76371	95	0.364439
36	2001	0.744315	49	0.450656	0.76371	95	0.368959
36	2002	0.744315	49	0.450834	0.756332	106	0.3338
36	2003	0.744315	49	0.453481	0.758876	104	0.327058
36	2004	0.744315	49	0.459629	0.744367	112	0.286655
36	2005	0.744315	49	0.468408	0.747425	104	0.289911
36	2006	0.744315	49	0.450826	0.756332	106	0.335068
36	2007	0.744315	49	0.442719	0.747461	109	0.29214
36	2008	0.744315	49	0.460995	0.743824	112	0.291314
36	2009	0.744315	49	0.450481	0.743824	112	0.295256
36	2010	0.744315	49	0.441529	0.743824	112	0.306663
37	1992	0.734026	116	0.335059	0.74649	167	0.331722
37	1993	0.734026	116	0.336974	0.74567	164	0.336641
37	1994	0.734026	116	0.335842	0.741311	166	0.325362
37	1995	0.734026	116	0.334884	0.748322	159	0.321801
37	1996	0.734026	116	0.339574	0.730448	162	0.316579
37	1997	0.734026	116	0.337548	0.735735	151	0.331042
37	1998	0.734026	116	0.340535	0.732748	151	0.346662
37	1999	0.734026	116	0.342587	0.737605	166	0.310521
37	2000	0.734026	116	0.344125	0.741872	152	0.337087
37	2001	0.734026	116	0.344218	0.735429	155	0.34186
37	2002	0.734026	116	0.34777	0.740451	153	0.363291
37	2003	0.734026	116	0.356096	0.742112	163	0.342581
37	2004	0.734026	116	0.355067	0.736444	150	0.369329
37	2005	0.734026	116	0.355002	0.740207	155	0.362259
37	2006	0.734026	116	0.352305	0.741934	158	0.3497
37	2007	0.734026	116	0.355328	0.739916	161	0.34834
37	2008	0.734026	116	0.359423	0.756416	166	0.34899
37	2009	0.734026	116	0.357494	0.741013	154	0.360644
37	2010	0.734026	116	0.360997	0.743684	160	0.374361
38	1992	0.749768	117	0.450201	0.749734	216	0.397199
38	1993	0.749768	117	0.449777	0.744552	228	0.373737
38	1994	0.749768	117	0.447836	0.761117	230	0.367116
38	1995	0.749768	117	0.447885	0.75583	247	0.363365
38	1996	0.749768	117	0.447606	0.765322	241	0.380916
38	1997	0.749768	117	0.446273	0.742299	219	0.410997
38	1998	0.749768	117	0.446389	0.756325	242	0.38373
38	1999	0.749768	117	0.445902	0.758028	242	0.378002
38	2000	0.749768	117	0.444506	0.759607	234	0.380982
38	2001	0.749768	117	0.44345	0.758366	239	0.379844
38	2002	0.749768	117	0.446359	0.755142	233	0.393712
38	2003	0.749768	117	0.444799	0.75734	234	0.383975
38	2004	0.749768	117	0.44224	0.744663	221	0.412809
38	2005	0.749768	117	0.443976	0.753468	225	0.385914
38	2006	0.749768	117	0.441811	0.749949	232	0.377686
38	2007	0.749768	117	0.441864	0.754157	241	0.364574
38	2008	0.749768	117	0.442054	0.757893	227	0.389488
38	2009	0.749768	117	0.442745	0.758504	238	0.379733
38	2010	0.749768	117	0.444288	0.759328	245	0.364148
39	1992	0.740905	96	0.330451	0.742863	100	0.398029
39	1993	0.740905	96	0.331967	0.742417	101	0.399413
39	1994	0.740905	96	0.330279	0.74781	153	0.315211
39	1995	0.740905	96	0.327926	0.735018	152	0.323905
39	1996	0.740905	96	0.325697	0.74097	154	0.29472
39	1997	0.740905	96	0.324751	0.73502	147	0.297457
39	1998	0.740905	96	0.332939	0.73502	147	0.315004
39	1999	0.740905	96	0.328905	0.736286	150	0.295147
39	2000	0.740905	96	0.330207	0.741354	142	0.337222
39	2001	0.740905	96	0.330846	0.756669	133	0.312927
39	2002	0.740905	96	0.330748	0.746879	133	0.316181
39	2003	0.740905	96	0.334666	0.754488	133	0.360053
39	2004	0.73543	93	0.324684	0.739916	125	0.359805
39	2005	0.740905	96	0.331842	0.742979	125	0.369256
39	2006	0.740905	96	0.336071	0.748819	127	0.377342
39	2007	0.740905	96	0.341006	0.747728	129	0.381168
39	2008	0.740905	96	0.339854	0.753763	130	0.349306
39	2009	0.740905	96	0.345374	0.753763	130	0.353522
39	2010	0.740905	96	0.344523	0.755283	143	0.325354
40	1992	0.697604	121	0.498953	0.745528	203	0.437652
40	1993	0.697604	121	0.499057	0.744012	210	0.426743
40	1994	0.697604	121	0.498411	0.746459	203	0.44216
40	1995	0.697604	121	0.499494	0.742143	218	0.418969
40	1996	0.697604	121	0.499097	0.742167	220	0.413931
40	1997	0.697604	121	0.500951	0.73858	234	0.392739
40	1998	0.696424	129	0.468264	0.738782	242	0.380462
40	1999	0.696424	129	0.47229	0.758803	229	0.395687
40	2000	0.696424	129	0.472417	0.755341	240	0.38587
40	2001	0.696424	129	0.471734	0.741787	229	0.395373
40	2002	0.696424	129	0.469865	0.752781	248	0.372054
40	2003	0.696424	129	0.469848	0.754253	244	0.382293
40	2004	0.699504	130	0.473925	0.755726	256	0.368375
40	2005	0.699504	130	0.474783	0.758022	246	0.386423
40	2006	0.699504	130	0.474652	0.753026	240	0.392226
40	2007	0.699504	130	0.476308	0.753214	252	0.377469
40	2008	0.699504	130	0.476201	0.756295	242	0.401122
40	2009	0.699504	130	0.476084	0.754347	233	0.4077
40	2010	0.699504	130	0.476781	0.75417	247	0.39217
44	1992	0.749709	145	0.392399	0.758302	264	0.338364
44	1993	0.749709	145	0.393725	0.754864	252	0.349798
44	1994	0.750597	144	0.38916	0.753313	255	0.343123
44	1995	0.751674	143	0.389007	0.753477	262	0.340574
44	1996	0.751674	143	0.383255	0.753343	248	0.367915
44	1997	0.750589	144	0.395334	0.751941	251	0.371391
44	1998	0.750589	144	0.394557	0.746844	262	0.357333
44	1999	0.747295	175	0.403719	0.746527	258	0.365794
44	2000	0.747295	175	0.405772	0.747654	262	0.370322
44	2001	0.747295	175	0.406146	0.750872	263	0.366157
44	2002	0.747295	175	0.406141	0.753488	268	0.361294
44	2003	0.747295	175	0.40783	0.753907	262	0.373666
44	2004	0.747295	175	0.405773	0.75216	257	0.37925
44	2005	0.747295	175	0.40603	0.75035	257	0.38846
44	2006	0.747295	175	0.406396	0.761126	266	0.375241
44	2007	0.747295	175	0.406068	0.754965	258	0.378364
44	2008	0.747295	175	0.406367	0.74969	262	0.373655
44	2009	0.747295	175	0.407516	0.7629	264	0.36999
44	2010	0.747295	175	0.411498	0.751242	258	0.384786
45	1992	0.736248	89	0.308174	0.751958	101	0.362723
45	1993	0.736248	89	0.308344	0.745108	99	0.356292
45	1994	0.736248	89	0.308367	0.745374	98	0.353473
45	1995	0.745671	91	0.311226	0.763781	134	0.346093
45	1996	0.745671	91	0.311716	0.756115	147	0.331752
45	1997	0.745671	91	0.309431	0.755546	135	0.335453
45	1998	0.745671	91	0.311574	0.770137	161	0.30009
45	1999	0.745671	91	0.311004	0.751219	153	0.313674
45	2000	0.745671	91	0.311419	0.753986	139	0.331486
45	2001	0.745671	91	0.311568	0.751851	146	0.333738
45	2002	0.745671	91	0.306473	0.759173	149	0.341102
45	2003	0.745671	91	0.308728	0.767783	152	0.32286
45	2004	0.745671	91	0.305458	0.781761	148	0.325944
45	2005	0.745671	91	0.306908	0.762466	136	0.345666
45	2006	0.745671	91	0.308067	0.763073	141	0.34004
45	2007	0.745671	91	0.311154	0.762792	136	0.34893
45	2008	0.745671	91	0.307671	0.757815	134	0.34711
45	2009	0.745671	91	0.308557	0.758308	133	0.35028
45	2010	0.745671	91	0.308099	0.765533	126	0.360096
46	1992	0.752394	94	0.342751	0.746398	172	0.323688
46	1993	0.756177	98	0.344018	0.753831	163	0.358342
46	1994	0.756177	98	0.343835	0.754822	177	0.320043
46	1995	0.754227	101	0.351648	0.770955	156	0.357637
46	1996	0.741875	115	0.394611	0.736206	148	0.411699
46	1997	0.741875	115	0.394098	0.744545	153	0.401142
46	1998	0.741875	115	0.394116	0.744545	153	0.403355
46	1999	0.741875	115	0.395053	0.744835	146	0.422951
46	2000	0.741875	115	0.395429	0.745733	145	0.427561
46	2001	0.756173	122	0.389012	0.751174	155	0.408504
46	2002	0.756173	122	0.389873	0.75032	184	0.376862
46	2003	0.756173	122	0.39156	0.751003	177	0.388577
46	2004	0.756173	122	0.391314	0.751426	185	0.363182
46	2005	0.756173	122	0.390468	0.760741	197	0.3805
46	2006	0.756173	122	0.387559	0.7683	212	0.345863
46	2007	0.756173	122	0.385329	0.763424	224	0.321659
46	2008	0.756173	122	0.385812	0.770164	220	0.330567
46	2009	0.756173	122	0.387328	0.769671	219	0.338015
46	2010	0.756173	122	0.386594	0.767964	223	0.337099
47	1992	0.703024	71	0.344392	0.742963	146	0.346964
47	1993	0.703024	71	0.330091	0.742963	146	0.339522
47	1994	0.703024	71	0.330348	0.742141	147	0.34803
47	1995	0.703024	71	0.330627	0.742141	147	0.346801
47	1996	0.707285	69	0.311029	0.743986	145	0.336793
47	1997	0.707285	69	0.313453	0.740521	156	0.327187
47	1998	0.707285	69	0.316729	0.746575	133	0.373765
47	1999	0.691834	67	0.313237	0.731086	157	0.326817
47	2000	0.691834	67	0.314381	0.731086	157	0.327361
47	2001	0.691834	67	0.32127	0.734587	140	0.371852
47	2002	0.691834	67	0.326588	0.721536	154	0.330446
47	2003	0.691834	67	0.320415	0.711813	166	0.310054
47	2004	0.696665	64	0.324838	0.72032	168	0.307119
47	2005	0.696665	64	0.324096	0.716752	173	0.316929
47	2006	0.696665	64	0.317492	0.711263	172	0.314599
47	2007	0.696665	64	0.333768	0.715607	155	0.333767
47	2008	0.696665	64	0.339528	0.715607	155	0.330343
47	2009	0.696665	64	0.33772	0.715607	155	0.330046
47	2010	0.696665	64	0.336899	0.741693	161	0.335274
48	1992	0.741285	123	0.371902	0.769541	198	0.347407
48	1993	0.742733	122	0.370912	0.764897	194	0.349222
48	1994	0.742733	122	0.368488	0.755888	218	0.374026
48	1995	0.742733	122	0.368638	0.752697	230	0.358637
48	1996	0.742733	122	0.368285	0.758663	217	0.34999
48	1997	0.742733	122	0.363879	0.75026	237	0.353052
48	1998	0.746412	123	0.367694	0.751667	232	0.368706
48	1999	0.746412	123	0.370661	0.75274	234	0.366168
48	2000	0.746412	123	0.369004	0.74991	240	0.375677
48	2001	0.746412	123	0.366836	0.751701	236	0.375229
48	2002	0.746412	123	0.368377	0.752656	234	0.381521
48	2003	0.746412	123	0.371159	0.753651	232	0.391961
48	2004	0.746412	123	0.368519	0.754575	230	0.39678
48	2005	0.746412	123	0.366147	0.753053	235	0.386497
48	2006	0.746412	123	0.368222	0.752543	236	0.38552
48	2007	0.746412	123	0.367254	0.764869	244	0.377274
48	2008	0.746412	123	0.36468	0.766285	248	0.375568
48	2009	0.746412	123	0.364082	0.767549	235	0.383945
48	2010	0.746412	123	0.365775	0.756214	228	0.39698
49	1992	0.737299	130	0.412399	0.757034	175	0.439266
49	1993	0.737299	130	0.412118	0.758427	176	0.446406
49	1994	0.737299	130	0.411625	0.758812	175	0.44316
49	1995	0.737299	130	0.411896	0.75897	175	0.442713
49	1996	0.737299	130	0.409983	0.758812	175	0.437661
49	1997	0.737299	130	0.407809	0.758427	176	0.43788
49	1998	0.737299	130	0.412356	0.758427	176	0.444524
49	1999	0.73694	131	0.41561	0.757091	243	0.393087
49	2000	0.73694	131	0.417141	0.755448	246	0.388303
49	2001	0.73694	131	0.417635	0.764366	255	0.382425
49	2002	0.73694	131	0.419105	0.766308	258	0.368809
49	2003	0.73694	131	0.41861	0.758747	242	0.395651
49	2004	0.73694	131	0.419357	0.765007	253	0.383981
49	2005	0.73694	131	0.419788	0.762833	244	0.386587
49	2006	0.73694	131	0.418907	0.754065	204	0.416656
49	2007	0.73694	131	0.421222	0.761429	235	0.399027
49	2008	0.73694	131	0.419433	0.772039	227	0.380895
49	2009	0.73694	131	0.419649	0.765473	218	0.394006
49	2010	0.73694	131	0.42079	0.76607	224	0.395048
50	1992	0.664477	144	0.465326	0.729271	233	0.421237
50	1993	0.664477	144	0.464534	0.732178	231	0.421961
50	1994	0.664477	144	0.470067	0.726693	234	0.415053
50	1995	0.664477	144	0.46626	0.726883	240	0.410401
50	1996	0.664477	144	0.462511	0.730914	230	0.420606
50	1997	0.664477	144	0.465594	0.722393	233	0.415348
50	1998	0.664477	144	0.462348	0.727915	236	0.416629
50	1999	0.664477	144	0.460712	0.72812	238	0.426881
50	2000	0.664477	144	0.460463	0.726889	239	0.417887
50	2001	0.664477	144	0.460262	0.742412	250	0.407473
50	2002	0.664477	144	0.458108	0.728039	238	0.424854
50	2003	0.664477	144	0.455407	0.726577	237	0.418348
50	2004	0.664477	144	0.455779	0.755344	268	0.391704
50	2005	0.664477	144	0.45724	0.727606	245	0.420495
50	2006	0.664477	144	0.459887	0.731081	250	0.413714
50	2007	0.664477	144	0.462184	0.735935	254	0.411336
50	2008	0.664477	144	0.463406	0.734709	257	0.417675
50	2009	0.664477	144	0.464719	0.735423	262	0.410826
50	2010	0.664477	144	0.460103	0.735868	257	0.40833
51	1992	0.687955	137	0.43829	0.716682	182	0.461758
52	1992	0.664888	120	0.41182	0.668358	123	0.426063
52	1993	0.664888	120	0.420216	0.67669	127	0.459233
52	1994	0.664888	120	0.421356	0.705152	167	0.451127
52	1995	0.664888	120	0.421026	0.716345	153	0.431699
52	1996	0.693188	128	0.399975	0.718645	146	0.436501
52	1997	0.693188	128	0.408245	0.717428	147	0.440719
52	1998	0.684551	142	0.425421	0.713759	163	0.449698
52	1999	0.656371	135	0.44912	0.719862	187	0.460234
52	2000	0.658523	147	0.419764	0.711958	184	0.42774
52	2001	0.658523	147	0.418592	0.698786	196	0.422315
52	2002	0.659722	146	0.419158	0.738308	214	0.401155
52	2003	0.659393	147	0.420705	0.732757	213	0.38812
52	2004	0.68118	155	0.40785	0.73564	207	0.410422
52	2005	0.680817	156	0.405121	0.712769	204	0.419553
52	2006	0.683547	157	0.411696	0.710429	226	0.394798
52	2007	0.680817	156	0.412271	0.722612	225	0.413145
52	2008	0.683059	159	0.421926	0.73369	230	0.410199
52	2009	0.683059	159	0.419267	0.729769	219	0.441395
52	2010	0.683059	159	0.418525	0.727927	242	0.403065
53	1992	0.751701	119	0.355454	0.752118	169	0.37131
53	1993	0.751701	119	0.352455	0.752355	161	0.368718
53	1994	0.751701	119	0.354657	0.748678	168	0.35366
53	1995	0.750811	120	0.354035	0.753092	164	0.352329
53	1996	0.750811	120	0.352572	0.752656	161	0.365659
53	1997	0.746066	132	0.331397	0.748811	173	0.359096
53	1998	0.745308	133	0.333095	0.739199	178	0.345653
53	1999	0.745308	133	0.332741	0.754407	170	0.374989
53	2000	0.745308	133	0.330731	0.747305	166	0.361156
53	2001	0.745308	133	0.327839	0.740569	183	0.339349
53	2002	0.745308	133	0.327234	0.740415	183	0.345
53	2003	0.745308	133	0.326732	0.743555	186	0.348341
53	2004	0.745308	133	0.326985	0.755785	210	0.323737
53	2005	0.745308	133	0.328644	0.760452	198	0.339284
53	2006	0.745308	133	0.326309	0.75924	200	0.322614
53	2007	0.745308	133	0.328161	0.764126	199	0.338741
53	2008	0.745308	133	0.32906	0.761854	210	0.353547
53	2009	0.745308	133	0.325877	0.759737	214	0.339765
53	2010	0.747418	130	0.33005	0.746154	203	0.36212
54	1992	0.634436	74	0.366716	0.752786	286	0.379147
54	1993	0.63291	76	0.359449	0.744618	279	0.386248
54	1994	0.63291	76	0.363169	0.732535	271	0.403952
54	1995	0.63291	76	0.371781	0.74593	280	0.395408
54	1996	0.629463	75	0.364872	0.745875	280	0.399053
54	1997	0.636825	76	0.368775	0.73418	266	0.420528
54	1998	0.636825	76	0.369273	0.73354	268	0.416755
54	1999	0.636825	76	0.366719	0.732684	265	0.420755
54	2000	0.653285	78	0.376004	0.74634	274	0.414409
54	2001	0.653285	78	0.376477	0.754262	286	0.404624
54	2002	0.653285	78	0.379649	0.744613	279	0.419385
54	2003	0.653703	79	0.386663	0.744392	280	0.433772
54	2004	0.658757	86	0.381476	0.744817	279	0.427869
54	2005	0.658448	85	0.380982	0.74569	281	0.421061
54	2006	0.658757	86	0.386275	0.74569	281	0.421039
54	2007	0.658757	86	0.38538	0.754812	285	0.409579
54	2008	0.658757	86	0.385659	0.742628	276	0.425734
54	2009	0.658757	86	0.387428	0.742628	276	0.432598
54	2010	0.659399	89	0.395534	0.754499	284	0.414525
55	1992	0.746099	122	0.357189	0.761545	149	0.392574
55	1993	0.746099	122	0.356924	0.759143	145	0.407718
55	1994	0.746099	122	0.356067	0.756097	153	0.390093
55	1995	0.742714	130	0.339047	0.760584	175	0.369554
55	1996	0.742714	130	0.340413	0.753178	185	0.346237
55	1997	0.742714	130	0.338479	0.753493	180	0.362242
55	1998	0.742714	130	0.34124	0.753493	180	0.363312
55	1999	0.742714	130	0.345342	0.753493	180	0.363641
55	2000	0.742714	130	0.343214	0.75606	175	0.402358
55	2001	0.742714	130	0.343636	0.753292	176	0.395486
55	2002	0.742714	130	0.344389	0.754394	177	0.405528
55	2003	0.742714	130	0.345825	0.756642	175	0.406035
55	2004	0.742714	130	0.345118	0.75238	176	0.401155
55	2005	0.742714	130	0.347644	0.746622	191	0.384033
55	2006	0.742714	130	0.344405	0.752105	177	0.404825
55	2007	0.742714	130	0.344739	0.750507	179	0.409627
55	2008	0.742714	130	0.346038	0.752347	177	0.402728
55	2009	0.742714	130	0.347814	0.75503	177	0.417706
55	2010	0.742714	130	0.342365	0.759611	170	0.416771
56	1992	0.735671	135	0.410094	0.756245	171	0.43831
56	1993	0.735671	135	0.40936	0.754398	174	0.435688
56	1994	0.735671	135	0.409316	0.752763	180	0.423225
56	1995	0.738842	131	0.408257	0.755779	172	0.4401
56	1996	0.738842	131	0.411092	0.755779	172	0.447631
56	1997	0.738842	131	0.407985	0.753264	179	0.423246
56	1998	0.738842	131	0.408517	0.756765	170	0.442059
56	1999	0.738842	131	0.410184	0.756765	170	0.441104
56	2000	0.738842	131	0.408261	0.756765	170	0.440752
56	2001	0.738842	131	0.408817	0.756765	170	0.442027
56	2002	0.738842	131	0.40979	0.745808	197	0.401763
56	2003	0.738842	131	0.410354	0.743412	205	0.389044
56	2004	0.738842	131	0.409081	0.742332	207	0.384194
56	2005	0.738842	131	0.409002	0.750031	197	0.413122
56	2006	0.738842	131	0.407446	0.75882	217	0.378451
56	2007	0.738842	131	0.407384	0.755517	215	0.381782
56	2008	0.738842	131	0.40629	0.755517	215	0.382078
56	2009	0.737625	132	0.407048	0.75882	217	0.381962
56	2010	0.737625	132	0.40484	0.75882	217	0.381366
57	1992	0.677001	68	0.464248	0.68058	115	0.448796
57	1993	0.677001	68	0.465624	0.693814	125	0.423857
57	1994	0.677001	68	0.462586	0.707446	120	0.465798
57	1995	0.687434	72	0.456299	0.712568	124	0.471448
57	1996	0.687434	72	0.462578	0.712568	124	0.473395
57	1997	0.687434	72	0.468712	0.712568	124	0.477271
57	1998	0.687434	72	0.467646	0.730445	225	0.379846
57	1999	0.687434	72	0.468518	0.733827	226	0.374567
57	2000	0.687434	72	0.471595	0.733042	220	0.37834
57	2001	0.687434	72	0.470729	0.73072	245	0.357979
57	2002	0.687434	72	0.47089	0.731039	233	0.366401
57	2003	0.686338	78	0.483135	0.728944	231	0.377979
57	2004	0.686338	78	0.481142	0.742902	246	0.380062
57	2005	0.686338	78	0.4826	0.745271	250	0.364966
57	2006	0.686463	79	0.490387	0.731421	243	0.380368
57	2007	0.686463	79	0.488608	0.743271	244	0.372636
57	2008	0.686463	79	0.489827	0.739317	241	0.370319
57	2009	0.686463	79	0.490661	0.759287	258	0.355952
57	2010	0.686463	79	0.493222	0.749637	249	0.378642
58	1992	0.727977	180	0.424403	0.739111	214	0.404544
58	1993	0.72736	181	0.430079	0.734069	237	0.378768
58	1994	0.72736	181	0.429226	0.735162	227	0.388997
58	1995	0.726783	182	0.427291	0.730313	243	0.376934
58	1996	0.726783	182	0.433548	0.740509	256	0.36546
58	1997	0.726783	182	0.425396	0.733924	239	0.380715
58	1998	0.726783	182	0.428666	0.736295	243	0.380682
58	1999	0.731912	184	0.4379	0.74292	246	0.382133
58	2000	0.731912	184	0.436996	0.743612	247	0.380812
58	2001	0.731912	184	0.436273	0.74502	233	0.40162
58	2002	0.731912	184	0.438072	0.744964	250	0.386294
58	2003	0.731912	184	0.437764	0.746861	241	0.393484
58	2004	0.731912	184	0.437061	0.74036	253	0.382924
58	2005	0.731912	184	0.439977	0.76287	233	0.407289
58	2006	0.731912	184	0.437719	0.754637	254	0.377705
58	2007	0.731912	184	0.438279	0.74315	243	0.392084
58	2008	0.731912	184	0.43851	0.74813	258	0.379481
58	2009	0.731912	184	0.43858	0.756058	263	0.36812
58	2010	0.731912	184	0.440565	0.754144	251	0.385516
59	1992	0.670258	173	0.437733	0.721716	235	0.408424
59	1993	0.670258	173	0.43815	0.711968	231	0.40963
59	1994	0.670258	173	0.440172	0.711571	244	0.417306
59	1995	0.670258	173	0.440568	0.708268	239	0.412521
59	1996	0.670258	173	0.439513	0.712244	230	0.428937
59	1997	0.670258	173	0.437549	0.707461	242	0.409147
59	1998	0.670258	173	0.437754	0.717662	246	0.410497
59	1999	0.670258	173	0.438062	0.724023	252	0.406957
59	2000	0.670004	174	0.441348	0.726274	251	0.404166
59	2001	0.670004	174	0.441409	0.713035	246	0.416025
59	2002	0.670004	174	0.443106	0.717404	247	0.422192
59	2003	0.670004	174	0.442163	0.740142	261	0.395476
59	2004	0.670004	174	0.44109	0.722518	251	0.412791
59	2005	0.670004	174	0.44229	0.718968	250	0.415808
59	2006	0.670004	174	0.443029	0.727094	257	0.411055
59	2007	0.670004	174	0.443372	0.73402	247	0.420018
59	2008	0.670004	174	0.444937	0.731283	260	0.413212
59	2009	0.670004	174	0.445225	0.736324	261	0.414295
59	2010	0.670004	174	0.446156	0.734927	259	0.414458
60	1992	0.703391	114	0.401072	0.740656	185	0.393593
60	1993	0.703391	114	0.401023	0.730501	212	0.384142
60	1994	0.708112	115	0.41134	0.746106	223	0.377026
60	1995	0.711337	103	0.440056	0.721729	217	0.397429
60	1996	0.711337	103	0.453511	0.723961	225	0.377995
60	1997	0.717057	99	0.453738	0.731911	218	0.401306
60	1998	0.711337	103	0.446727	0.725497	227	0.385979
60	1999	0.706674	108	0.441815	0.736624	227	0.399073
60	2000	0.706674	108	0.441646	0.743901	244	0.407891
60	2001	0.706674	108	0.44746	0.733366	251	0.410356
60	2002	0.706674	108	0.449106	0.740828	260	0.405935
60	2003	0.706674	108	0.451463	0.743866	256	0.403484
60	2004	0.706674	108	0.442814	0.740521	261	0.384759
60	2005	0.706674	108	0.416458	0.752357	265	0.374277
60	2006	0.704011	110	0.423537	0.75265	264	0.384679
60	2007	0.704011	110	0.421655	0.750027	256	0.399396
60	2008	0.704011	110	0.422271	0.747113	254	0.39689
60	2009	0.704011	110	0.416987	0.748703	264	0.392664
60	2010	0.704011	110	0.418114	0.748706	264	0.387928
61	1992	0.78739	22	0.480634	0.705197	48	0.398521
61	1993	0.78739	22	0.477875	0.705197	48	0.393632
61	1994	0.78739	22	0.481855	0.783269	32	0.565484
61	1995	0.78739	22	0.48327	0.784835	33	0.578707
61	1996	0.78739	22	0.484413	0.783269	32	0.57824
61	1997	0.78739	22	0.483885	0.784835	33	0.591225
61	1998	0.78739	22	0.483431	0.783269	32	0.588332
61	1999	0.78739	22	0.48198	0.784835	33	0.588468
61	2000	0.78739	22	0.483915	0.783269	32	0.590658
61	2001	0.78739	22	0.483988	0.783269	32	0.593772
61	2002	0.78739	22	0.482562	0.748749	55	0.391108
61	2003	0.78739	22	0.481832	0.748749	55	0.411306
61	2004	0.78739	22	0.480855	0.748749	55	0.390881
61	2005	0.78739	22	0.481386	0.709513	72	0.31792
61	2006	0.78739	22	0.4811	0.709383	71	0.320342
61	2007	0.78739	22	0.48164	0.709383	71	0.317942
61	2008	0.78739	22	0.48033	0.709383	71	0.318349
61	2009	0.78739	22	0.481218	0.709383	71	0.322206
61	2010	0.78739	22	0.479776	0.748749	55	0.410395
62	1992	0.765064	185	0.393522	0.769718	215	0.400614
63	1992	0.669314	64	0.464172	0.708674	184	0.365274
63	1993	0.669314	64	0.466261	0.724866	212	0.357965
63	1994	0.669314	64	0.465425	0.723641	227	0.359162
63	1995	0.669314	64	0.464944	0.744036	234	0.351388
63	1996	0.669314	64	0.462204	0.73428	229	0.38432
63	1997	0.669314	64	0.472215	0.728338	232	0.388165
63	1998	0.669314	64	0.454743	0.741134	240	0.383622
63	1999	0.669314	64	0.448254	0.742119	242	0.371541
63	2000	0.669314	64	0.457196	0.729119	231	0.381114
63	2001	0.675909	65	0.469059	0.731155	231	0.380553
63	2002	0.675909	65	0.458621	0.730558	232	0.373419
63	2003	0.679347	63	0.445696	0.730254	233	0.376788
63	2004	0.692089	74	0.421319	0.732802	240	0.399956
63	2005	0.692089	74	0.412441	0.734794	239	0.406329
63	2006	0.692089	74	0.403595	0.744656	253	0.393856
63	2007	0.692089	74	0.401653	0.745666	250	0.402048
63	2008	0.674457	81	0.377662	0.742568	249	0.402583
63	2009	0.674457	81	0.374987	0.745519	247	0.410168
63	2010	0.674457	81	0.387084	0.743462	253	0.40347
64	1992	NA	1	NA	0.730224	205	0.305233
64	1993	NA	1	NA	0.726235	196	0.297427
64	1994	NA	1	NA	0.726147	202	0.290029
64	1995	NA	1	NA	0.729035	179	0.326687
64	1996	NA	1	NA	0.731376	208	0.294717
64	1997	NA	1	NA	0.723703	196	0.309978
64	1998	NA	1	NA	0.729436	202	0.30152
64	1999	NA	1	NA	0.725177	194	0.311979
64	2000	NA	1	NA	0.724681	195	0.306427
64	2001	NA	1	NA	0.722684	201	0.293111
64	2002	NA	1	NA	0.721693	205	0.304502
64	2003	NA	1	NA	0.719386	198	0.315769
64	2004	NA	1	NA	0.723686	201	0.323556
64	2005	NA	1	NA	0.71246	183	0.338802
64	2006	NA	1	NA	0.712449	177	0.340773
64	2007	NA	1	NA	0.718663	183	0.349476
64	2008	NA	1	NA	0.718663	183	0.350562
64	2009	NA	1	NA	0.724018	188	0.359073
64	2010	NA	1	NA	0.743922	159	0.399811
65	2003	NA	NA	NA	1	3	1
65	2004	NA	NA	NA	1	3	1
65	2005	NA	NA	NA	1	3	1
65	2006	NA	NA	NA	1	3	1
65	2007	NA	NA	NA	1	3	1
66	1992	0.728534	117	0.299214	0.741071	207	0.359858
66	1993	0.721878	124	0.317585	0.747782	239	0.357958
66	1994	0.721878	124	0.326274	0.751126	226	0.371423
66	1995	0.721878	124	0.323068	0.74076	213	0.384187
66	1996	0.721878	124	0.317793	0.74323	213	0.372754
66	1997	0.721878	124	0.322796	0.743965	212	0.377771
66	1998	0.721878	124	0.330697	0.743459	212	0.376008
66	1999	0.721878	124	0.321225	0.746352	216	0.371913
66	2000	0.721878	124	0.323649	0.735054	221	0.378916
66	2001	0.721878	124	0.32116	0.735916	228	0.375106
66	2002	0.721878	124	0.321872	0.727715	233	0.362226
66	2003	0.721878	124	0.330025	0.735561	244	0.380545
66	2004	0.72592	110	0.351471	0.744369	230	0.394431
66	2005	0.72592	110	0.351274	0.743677	229	0.397833
66	2006	0.72592	110	0.353635	0.740924	230	0.406812
66	2007	0.72592	110	0.351508	0.737589	227	0.405333
66	2008	0.72592	110	0.354522	0.736692	230	0.397206
66	2009	0.72592	110	0.353375	0.751755	226	0.399105
66	2010	0.72592	110	0.357334	0.740353	227	0.403673
67	1992	0.686747	59	0.420867	0.730936	234	0.401442
67	1993	0.686586	60	0.42132	0.730713	235	0.403335
67	1994	0.683019	67	0.41141	0.744291	249	0.386441
67	1995	0.678029	72	0.400185	0.74689	247	0.395262
67	1996	0.688687	76	0.399064	0.730502	248	0.401877
67	1997	0.688687	76	0.395514	0.746628	267	0.380309
67	1998	0.688687	76	0.39652	0.74464	273	0.373633
67	1999	0.688687	76	0.397507	0.74203	272	0.374719
67	2000	0.688687	76	0.401062	0.74489	276	0.376953
67	2001	0.688687	76	0.400945	0.743227	275	0.37748
67	2002	0.688687	76	0.399605	0.741142	271	0.385122
67	2003	0.688687	76	0.403043	0.744035	278	0.380856
67	2004	0.688687	76	0.402475	0.727762	266	0.391138
67	2005	0.695051	77	0.398941	0.741042	277	0.384818
67	2006	0.695051	77	0.400762	0.732412	263	0.399643
67	2007	0.695051	77	0.395164	0.74464	268	0.40035
67	2008	0.695051	77	0.391576	0.740268	271	0.394592
67	2009	0.695051	77	0.395029	0.755084	279	0.386393
67	2010	0.695051	77	0.399221	0.753049	283	0.380966
68	1992	0.679741	135	0.540506	0.754296	290	0.431121
68	1993	0.679741	135	0.539018	0.754296	290	0.432678
68	1994	0.679741	135	0.5374	0.75543	291	0.435643
68	1995	0.679741	135	0.535481	0.756113	289	0.432512
68	1996	0.679741	135	0.535817	0.755773	290	0.429469
68	1997	0.679741	135	0.535793	0.75543	291	0.431515
68	1998	0.679741	135	0.535529	0.75543	291	0.430278
68	1999	0.679741	135	0.5356	0.75543	291	0.436814
68	2000	0.679058	123	0.575837	0.755773	290	0.43619
68	2001	0.699826	132	0.549721	0.754279	290	0.435391
68	2002	0.699826	132	0.549818	0.754622	289	0.432113
68	2003	0.699826	132	0.549576	0.754622	289	0.437503
68	2004	0.699826	132	0.549247	0.754622	289	0.432852
68	2005	0.700364	130	0.551366	0.754622	289	0.434217
68	2006	0.700364	130	0.554061	0.754622	289	0.432727
68	2007	0.700364	130	0.553187	0.754532	285	0.438137
68	2008	0.701786	140	0.516542	0.754532	285	0.436559
68	2009	0.701786	140	0.517392	0.754532	285	0.438395
68	2010	0.701786	140	0.519833	0.754532	285	0.442809
69	1992	0.685273	62	0.363981	0.685273	62	0.363981
69	1993	0.692945	63	0.373336	0.692945	63	0.373336
69	1994	0.679698	92	0.354188	0.679698	92	0.354188
69	1995	0.679698	92	0.359287	0.679698	92	0.359287
69	1996	0.679698	92	0.364034	0.679698	92	0.364034
69	1997	0.679698	92	0.363632	0.679698	92	0.363632
69	1998	0.688294	86	0.351167	0.688294	86	0.351167
69	1999	0.688294	86	0.352367	0.688294	86	0.352367
69	2000	0.688294	86	0.352408	0.688294	86	0.352408
69	2001	0.688294	86	0.351877	0.688294	86	0.351877
69	2002	0.688294	86	0.351926	0.688294	86	0.351926
69	2003	0.688294	86	0.35051	0.688294	86	0.35051
69	2004	0.688294	86	0.3504	0.688294	86	0.3504
69	2005	0.688294	86	0.355762	0.688294	86	0.355762
69	2006	0.688294	86	0.34498	0.688294	86	0.34498
69	2007	0.688294	86	0.347884	0.688294	86	0.347884
69	2008	0.688294	86	0.348681	0.688294	86	0.348681
69	2009	0.688294	86	0.34824	0.688294	86	0.34824
69	2010	0.688294	86	0.350683	0.688294	86	0.350683
70	1992	0.701343	103	0.347669	0.730799	223	0.341364
70	1993	0.701343	103	0.353275	0.756682	228	0.33824
70	1994	0.701343	103	0.357814	0.742448	217	0.349945
70	1995	0.701343	103	0.359349	0.712119	203	0.37602
70	1996	0.701343	103	0.362383	0.71708	204	0.372281
70	1997	0.701343	103	0.365453	0.714108	214	0.358024
70	1998	0.701343	103	0.367419	0.715325	212	0.359772
70	1999	0.701343	103	0.368028	0.714582	213	0.362338
70	2000	0.701343	103	0.371352	0.714582	213	0.363678
70	2001	0.701343	103	0.372336	0.721017	224	0.368154
70	2002	0.701343	103	0.373517	0.715687	216	0.376891
70	2003	0.701343	103	0.372502	0.713363	222	0.370926
70	2004	0.701343	103	0.37421	0.730015	232	0.354987
70	2005	0.701343	103	0.372475	0.726358	229	0.363201
70	2006	0.701343	103	0.370536	0.731618	236	0.360802
70	2007	0.701343	103	0.372724	0.723414	230	0.370706
70	2008	0.701343	103	0.374697	0.72515	227	0.370159
70	2009	0.701343	103	0.376533	0.742107	244	0.353489
70	2010	0.701343	103	0.373707	0.747664	245	0.348104
72	1992	0.654679	78	0.473601	0.730119	159	0.399416
72	1993	0.654679	78	0.473775	0.730119	159	0.396784
72	1994	0.654679	78	0.469038	0.730119	159	0.387753
72	1995	0.654679	78	0.4734	0.730119	159	0.388752
72	1996	0.654679	78	0.47384	0.730119	159	0.393533
72	1997	0.654679	78	0.471333	0.730928	158	0.375903
72	1998	0.654679	78	0.470277	0.729532	160	0.382032
72	1999	0.654679	78	0.473592	0.727564	162	0.377518
72	2000	0.654679	78	0.472942	0.723483	163	0.367989
72	2001	0.654679	78	0.480632	0.726108	168	0.402498
72	2002	0.654679	78	0.475355	0.722573	186	0.392275
72	2003	0.654679	78	0.470742	0.722583	198	0.374526
72	2004	0.654679	78	0.463554	0.714502	183	0.362697
72	2005	0.654679	78	0.467756	0.719898	191	0.36224
72	2006	0.654679	78	0.46639	0.730533	192	0.350667
72	2007	0.654679	78	0.468584	0.724489	199	0.342419
72	2008	0.654679	78	0.467618	0.724131	200	0.353628
72	2009	0.654679	78	0.46978	0.724131	200	0.362575
72	2010	0.65487	77	0.466521	0.711979	185	0.371964
73	1992	0.65999	98	0.468396	0.668416	105	0.468897
73	1993	0.65999	98	0.465376	0.706271	135	0.446272
73	1994	0.675379	104	0.456661	0.70182	141	0.4416
73	1995	0.675379	104	0.457104	0.697368	140	0.4582
73	1996	0.675379	104	0.460252	0.694884	137	0.45824
73	1997	0.675379	104	0.448143	0.700363	144	0.448967
73	1998	0.670526	107	0.449412	0.710671	151	0.444999
73	1999	0.671272	106	0.455654	0.711616	149	0.438704
73	2000	0.671203	115	0.441676	0.711639	183	0.429781
73	2001	0.671203	115	0.443648	0.706944	183	0.419508
73	2002	0.671232	107	0.463427	0.724946	193	0.403418
73	2003	0.671203	115	0.437982	0.717239	194	0.417739
73	2004	0.675078	119	0.45066	0.722012	206	0.402545
73	2005	0.683104	123	0.447659	0.726373	197	0.419649
73	2006	0.683104	123	0.450625	0.726251	209	0.413293
73	2007	0.683104	123	0.448383	0.730815	208	0.420906
73	2008	0.683104	123	0.451661	0.731735	212	0.422191
73	2009	0.679124	122	0.445588	0.734156	207	0.408522
73	2010	0.679124	122	0.449091	0.733628	188	0.446753
74	1992	0.719053	84	0.266903	0.741987	153	0.345702
74	1993	0.717511	86	0.27727	0.747849	212	0.30025
74	1994	0.717511	86	0.278368	0.737171	217	0.275873
74	1995	0.717511	86	0.277275	0.756972	205	0.293849
74	1996	0.717511	86	0.280294	0.747991	197	0.319254
74	1997	0.717511	86	0.278697	0.750706	213	0.326283
74	1998	0.717511	86	0.280148	0.761763	214	0.323329
74	1999	0.717511	86	0.280434	0.75187	212	0.333894
74	2000	0.717511	86	0.28126	0.75187	216	0.339311
74	2001	0.717511	86	0.279494	0.751288	230	0.31619
74	2002	0.717511	86	0.281811	0.759039	195	0.328035
74	2003	0.717511	86	0.281303	0.759258	219	0.304767
74	2004	0.717511	86	0.280511	0.760225	205	0.343542
74	2005	0.717511	86	0.280762	0.761412	221	0.325365
74	2006	0.717511	86	0.281019	0.761543	207	0.337495
74	2007	0.717511	86	0.278585	0.762498	205	0.309632
74	2008	0.717511	86	0.279363	0.763292	204	0.310539
74	2009	0.717511	86	0.285859	0.763292	204	0.314119
74	2010	0.717511	86	0.289254	0.754513	188	0.334327
75	1992	0.690748	79	0.212792	0.728316	98	0.334341
75	1993	0.690748	79	0.212379	0.728751	95	0.328886
75	1994	0.690748	79	0.214328	0.728316	98	0.330115
75	1995	0.690748	79	0.21257	0.732234	117	0.304871
75	1996	0.690748	79	0.218237	0.734826	108	0.314581
75	1997	0.690748	79	0.219873	0.733488	109	0.315023
75	1998	0.690748	79	0.223065	0.732234	117	0.304505
75	1999	0.690748	79	0.220787	0.730787	160	0.318353
75	2000	0.690748	79	0.220584	0.751116	163	0.306476
75	2001	0.690748	79	0.221076	0.757074	164	0.310193
75	2002	0.690748	79	0.224439	0.754235	170	0.296267
75	2003	0.690748	79	0.224191	0.741439	152	0.314758
75	2004	0.690748	79	0.224672	0.733006	148	0.321032
75	2005	0.690748	79	0.225	0.74857	173	0.291845
75	2006	0.690748	79	0.224941	0.764141	171	0.284372
75	2007	0.690748	79	0.228055	0.75957	164	0.316368
75	2008	0.690748	79	0.227653	0.760218	169	0.292747
75	2009	0.690748	79	0.226041	0.754947	176	0.288815
75	2010	0.690748	79	0.224356	0.763895	174	0.299363
79	1992	0.661	89	0.538206	0.741852	282	0.452626
79	1993	0.661	89	0.531751	0.741852	282	0.452984
79	1994	0.661	89	0.527708	0.754996	292	0.436254
79	1995	0.664576	87	0.52144	0.742915	280	0.444825
79	1996	0.664576	87	0.522554	0.742915	280	0.446351
79	1997	0.680457	80	0.552331	0.742915	280	0.446634
79	1998	0.680457	80	0.554579	0.742915	280	0.448263
79	1999	0.680457	80	0.554789	0.757448	286	0.437869
79	2000	0.680457	80	0.558108	0.742577	281	0.449138
79	2001	0.680457	80	0.553368	0.744279	276	0.452921
79	2002	0.680457	80	0.555086	0.757448	286	0.440753
79	2003	0.665624	87	0.529665	0.743712	282	0.453537
79	2004	0.665624	87	0.529617	0.75555	291	0.441956
79	2005	0.664276	94	0.50984	0.756942	287	0.447393
79	2006	0.67006	104	0.506375	0.754416	290	0.445125
79	2007	0.67006	104	0.505331	0.755475	287	0.450648
79	2008	0.675462	105	0.509014	0.755475	287	0.439263
79	2009	0.675462	105	0.50951	0.755475	287	0.440017
79	2010	0.675462	105	0.510034	0.755475	287	0.438712
80	1992	0.651444	91	0.492561	0.698111	139	0.470593
80	1993	0.651367	87	0.511063	0.702374	138	0.49181
80	1994	0.651367	87	0.513457	0.709999	138	0.481627
80	1995	0.651367	87	0.511953	0.709367	139	0.481295
80	1996	0.651367	87	0.50721	0.709114	140	0.490168
80	1997	0.651367	87	0.490965	0.709114	140	0.487651
80	1998	0.651367	87	0.49038	0.710223	139	0.474276
80	1999	0.651367	87	0.487236	0.709114	140	0.472347
80	2000	0.651367	87	0.491107	0.709114	140	0.491071
80	2001	0.651367	87	0.490775	0.709114	140	0.489615
80	2002	0.651139	88	0.495289	0.708644	141	0.491968
80	2003	0.650766	89	0.501351	0.731199	219	0.404869
80	2004	0.649948	94	0.499068	0.732782	252	0.390666
80	2005	0.650821	102	0.495134	0.728106	234	0.411213
80	2006	0.650821	102	0.504376	0.728525	238	0.403617
80	2007	0.650821	102	0.499808	0.7291	229	0.416996
80	2008	0.650821	102	0.49909	0.733433	242	0.396816
80	2009	0.656012	103	0.500172	0.723703	239	0.408974
80	2010	0.656161	104	0.508499	0.727004	235	0.419804
81	1992	0.753973	118	0.32509	0.767058	147	0.343901
81	1993	0.753973	118	0.326686	0.767058	147	0.353241
81	1994	0.753973	118	0.326752	0.767058	147	0.3568
81	1995	0.753973	118	0.338012	0.767058	147	0.361229
81	1996	0.751474	146	0.313244	0.766439	215	0.295721
81	1997	0.751474	146	0.31644	0.767451	218	0.290334
81	1998	0.751474	146	0.319401	0.76647	219	0.309932
81	1999	0.751474	146	0.31905	0.764158	219	0.319916
81	2000	0.751474	146	0.319546	0.769585	224	0.320377
81	2001	0.751474	146	0.320816	0.765949	226	0.326848
81	2002	0.751474	146	0.323461	0.768053	229	0.334076
81	2003	0.751474	146	0.322686	0.75706	232	0.342093
81	2004	0.751474	146	0.322452	0.751666	220	0.335788
81	2005	0.751474	146	0.32327	0.765694	242	0.33876
81	2006	0.751474	146	0.323798	0.768386	234	0.327479
81	2007	0.751474	146	0.324597	0.752202	235	0.337706
81	2008	0.751474	146	0.325576	0.768487	238	0.325596
81	2009	0.751474	146	0.325272	0.762399	237	0.332306
81	2010	0.751474	146	0.325901	0.758871	251	0.313555
83	1992	0.703832	58	0.22723	0.741334	115	0.321946
83	1993	0.703832	58	0.229408	0.741334	115	0.314936
83	1994	0.703832	58	0.228424	0.732924	126	0.29873
83	1995	0.703832	58	0.226072	0.742948	140	0.313101
83	1996	0.703832	58	0.226309	0.721738	139	0.308265
83	1997	0.703832	58	0.22713	0.728392	145	0.300585
83	1998	0.703832	58	0.227706	0.740992	123	0.309703
83	1999	0.703832	58	0.227741	0.746615	125	0.328834
83	2000	0.703832	58	0.230133	0.744938	127	0.335393
83	2001	0.703832	58	0.229483	0.744938	127	0.323649
83	2002	0.703832	58	0.22951	0.736445	124	0.302222
83	2003	0.703832	58	0.229057	0.736999	123	0.315835
83	2004	0.703832	58	0.226508	0.736999	123	0.315741
83	2005	0.703832	58	0.224507	0.705178	165	0.328302
83	2006	0.703832	58	0.223806	0.724497	166	0.328604
83	2007	0.703832	58	0.223088	0.725691	164	0.322596
83	2008	0.703832	58	0.224547	0.726253	163	0.321878
83	2009	0.703832	58	0.224658	0.727142	143	0.357318
83	2010	0.703832	58	0.225777	0.733963	144	0.351797
84	1992	0.671321	150	0.516016	0.729426	231	0.441881
84	1993	0.680641	158	0.497647	0.726669	257	0.412564
84	1994	0.679571	160	0.49712	0.730647	263	0.407191
84	1995	0.679511	158	0.495102	0.744386	266	0.402576
84	1996	0.679511	158	0.496533	0.747228	270	0.401533
84	1997	0.679511	158	0.495667	0.731806	265	0.409198
84	1998	0.670447	154	0.506971	0.746014	274	0.407468
84	1999	0.670274	152	0.509644	0.732201	265	0.422771
84	2000	0.670274	152	0.508494	0.732335	265	0.416816
84	2001	0.670274	152	0.509129	0.745598	275	0.404804
84	2002	0.670274	152	0.509253	0.732916	263	0.425118
84	2003	0.670274	152	0.508329	0.746901	276	0.408571
84	2004	0.670274	152	0.506523	0.754669	279	0.402916
84	2005	0.670274	152	0.505018	0.742358	270	0.413858
84	2006	0.676803	158	0.505639	0.743718	271	0.41848
84	2007	0.676803	158	0.505329	0.744751	268	0.420942
84	2008	0.676803	158	0.506121	0.745028	267	0.433482
84	2009	0.676803	158	0.507073	0.755676	281	0.412825
84	2010	0.676803	158	0.507511	0.756623	278	0.417261
86	1992	0.733312	137	0.426311	0.748819	177	0.431002
86	1993	0.733312	137	0.425147	0.748819	177	0.430294
86	1994	0.733312	137	0.42466	0.746393	184	0.412269
86	1995	0.733312	137	0.422178	0.745111	186	0.40948
86	1996	0.734127	136	0.419545	0.747339	187	0.400649
86	1997	0.734127	136	0.416417	0.735877	183	0.39359
86	1998	0.734127	136	0.418476	0.744475	187	0.390317
86	1999	0.734127	136	0.420431	0.745587	185	0.408506
86	2000	0.734127	136	0.414716	0.745587	185	0.400148
86	2001	0.734127	136	0.416686	0.736968	181	0.397754
86	2002	0.734127	136	0.415065	0.751505	202	0.393259
86	2003	0.734127	136	0.417452	0.749366	214	0.376213
86	2004	0.734127	136	0.413953	0.742601	223	0.376315
86	2005	0.735306	139	0.428315	0.73858	211	0.396823
86	2006	0.735306	139	0.429801	0.736017	211	0.395802
86	2007	0.735306	139	0.430823	0.745581	212	0.38586
86	2008	0.735306	139	0.427984	0.740362	191	0.402867
86	2009	0.735306	139	0.43204	0.745086	217	0.389909
86	2010	0.735306	139	0.433943	0.74503	212	0.385413
87	1992	0.71139	122	0.382971	0.71139	122	0.382971
87	1993	0.711962	121	0.381872	0.711962	121	0.381872
87	1994	0.711962	121	0.377504	0.711962	121	0.377504
87	1995	0.711962	121	0.375795	0.711962	121	0.375795
87	1996	0.711962	121	0.38033	0.711962	121	0.38033
87	1997	0.711962	121	0.380622	0.711962	121	0.380622
87	1998	0.711962	121	0.384846	0.711962	121	0.384846
87	1999	0.711962	121	0.384391	0.711962	121	0.384391
87	2000	0.711962	121	0.378313	0.711962	121	0.378313
87	2001	0.711962	121	0.384175	0.711962	121	0.384175
87	2002	0.711962	121	0.384257	0.711962	121	0.384257
87	2003	0.711962	121	0.379283	0.711962	121	0.379283
87	2004	0.711962	121	0.370623	0.711962	121	0.370623
87	2005	0.711962	121	0.370707	0.711962	121	0.370707
87	2006	0.711962	121	0.373499	0.711962	121	0.373499
87	2007	0.711962	121	0.37231	0.711962	121	0.37231
87	2008	0.711962	121	0.372657	0.711962	121	0.372657
87	2009	0.711962	121	0.377197	0.711962	121	0.377197
87	2010	0.711962	121	0.375491	0.711962	121	0.375491
88	1992	0.685779	75	0.341988	0.707755	91	0.409043
88	1993	0.685779	75	0.343094	0.707755	91	0.395729
88	1994	0.685779	75	0.346214	0.707755	91	0.397935
88	1995	0.685779	75	0.340398	0.707755	91	0.391423
88	1996	0.685779	75	0.340709	0.707755	91	0.395531
88	1997	0.685779	75	0.33924	0.707755	91	0.390502
88	1998	0.685779	75	0.338251	0.707755	91	0.394479
88	1999	0.685779	75	0.341416	0.707755	91	0.39314
88	2000	0.685779	75	0.342608	0.707755	91	0.39662
88	2001	0.685779	75	0.342911	0.707755	91	0.399532
88	2002	0.685779	75	0.343415	0.707755	91	0.40518
88	2003	0.685779	75	0.338723	0.723054	112	0.365612
88	2004	0.685779	75	0.34489	0.727243	107	0.37006
88	2005	0.685779	75	0.348099	0.706342	118	0.327288
88	2006	0.685779	75	0.345632	0.706342	118	0.323915
88	2007	0.685779	75	0.352139	0.706342	118	0.327376
88	2008	0.685779	75	0.353174	0.711104	82	0.360793
88	2009	0.685779	75	0.350452	0.711104	82	0.36483
88	2010	0.685779	75	0.350728	0.685779	75	0.350728
89	1992	0.737737	150	0.38438	0.738964	177	0.376184
89	1993	0.733453	156	0.409771	0.754329	232	0.368452
89	1994	0.733453	156	0.41033	0.751363	238	0.366705
89	1995	0.733453	156	0.411063	0.740492	243	0.351556
89	1996	0.733453	156	0.410172	0.739862	247	0.347265
89	1997	0.733453	156	0.412228	0.751822	260	0.346701
89	1998	0.733453	156	0.411813	0.738744	250	0.364499
89	1999	0.733453	156	0.412782	0.738445	251	0.367783
89	2000	0.733453	156	0.413259	0.740194	241	0.379446
89	2001	0.733453	156	0.412372	0.744344	243	0.373763
89	2002	0.733453	156	0.411961	0.736823	251	0.36033
89	2003	0.733453	156	0.411444	0.731626	242	0.378136
89	2004	0.733453	156	0.410809	0.739942	247	0.366576
89	2005	0.733453	156	0.410371	0.735814	242	0.379942
89	2006	0.733453	156	0.409086	0.73436	246	0.372118
89	2007	0.733453	156	0.410044	0.738366	251	0.374441
89	2008	0.733453	156	0.407058	0.74008	249	0.374125
89	2009	0.733453	156	0.406033	0.752755	258	0.360815
89	2010	0.733453	156	0.405332	0.748725	262	0.354668
90	1992	0.751171	105	0.321723	0.756063	116	0.380955
90	1993	0.751171	105	0.319939	0.75543	117	0.386815
90	1994	0.751171	105	0.321083	0.75543	117	0.389845
90	1995	0.751171	105	0.320142	0.762466	184	0.313735
90	1996	0.751171	105	0.320304	0.762716	201	0.275106
90	1997	0.751171	105	0.319408	0.759526	190	0.29064
90	1998	0.751171	105	0.321085	0.764187	182	0.298925
90	1999	0.751171	105	0.319217	0.751521	200	0.293287
90	2000	0.751171	105	0.31805	0.741891	196	0.29334
90	2001	0.751171	105	0.318492	0.759793	182	0.307666
90	2002	0.751171	105	0.319709	0.749047	192	0.310688
90	2003	0.750341	106	0.325629	0.747284	195	0.292024
90	2004	0.750341	106	0.325416	0.743144	192	0.303536
90	2005	0.750341	106	0.325282	0.739971	184	0.309094
90	2006	0.750341	106	0.325497	0.755304	191	0.289137
90	2007	0.750341	106	0.3252	0.755304	191	0.291954
90	2008	0.750341	106	0.326549	0.755684	178	0.322453
90	2009	0.750341	106	0.326349	0.754482	180	0.321188
90	2010	0.750341	106	0.326249	0.748596	191	0.308366
91	1992	0.702276	85	0.365581	0.726729	107	0.429884
91	1993	0.702276	85	0.365257	0.726729	107	0.430342
91	1994	0.702276	85	0.36424	0.726729	107	0.431216
91	1995	0.702276	85	0.366563	0.735183	109	0.430834
91	1996	0.702276	85	0.362928	0.728417	124	0.385033
91	1997	0.731545	114	0.4176	0.750376	229	0.345697
91	1998	0.731545	114	0.419496	0.754726	216	0.372774
91	1999	0.723319	131	0.390625	0.746541	229	0.367145
91	2000	0.730643	141	0.394121	0.749549	216	0.395543
91	2001	0.730643	141	0.40382	0.746292	228	0.382406
91	2002	0.730643	141	0.400348	0.750115	220	0.385437
91	2003	0.730643	141	0.403886	0.757555	207	0.410619
91	2004	0.730643	141	0.403752	0.754655	205	0.416672
91	2005	0.730643	141	0.406923	0.756255	199	0.427356
91	2006	0.730643	141	0.404583	0.752626	210	0.406579
91	2007	0.730643	141	0.404841	0.748275	238	0.383231
91	2008	0.730643	141	0.407909	0.751287	224	0.394231
91	2009	0.730643	141	0.401266	0.751287	224	0.388835
91	2010	0.730643	141	0.400573	0.753045	230	0.387629
93	1992	0.72309	131	0.424115	0.7466	150	0.446264
93	1993	0.72309	131	0.424261	0.7466	150	0.450793
93	1994	0.72309	131	0.426154	0.7466	150	0.448356
93	1995	0.72309	131	0.425754	0.7466	150	0.44644
93	1996	0.72309	131	0.428589	0.742186	170	0.447114
93	1997	0.72309	131	0.429368	0.728325	186	0.416167
93	1998	0.72309	131	0.430118	0.733886	194	0.415375
93	1999	0.72309	131	0.430185	0.740511	191	0.413674
93	2000	0.72309	131	0.429809	0.739584	192	0.420458
93	2001	0.72309	131	0.430318	0.74144	189	0.423336
93	2002	0.72309	131	0.429914	0.741031	190	0.416732
93	2003	0.72309	131	0.43113	0.736261	182	0.411556
93	2004	0.72309	131	0.430611	0.740667	186	0.408121
93	2005	0.72309	131	0.431177	0.743001	184	0.414287
93	2006	0.72309	131	0.430915	0.746309	175	0.425686
93	2007	0.72309	131	0.431056	0.743152	186	0.401759
93	2008	0.72309	131	0.430442	0.741436	188	0.403821
93	2009	0.72309	131	0.430286	0.736272	187	0.410466
93	2010	0.72309	131	0.430158	0.741029	189	0.403119
95	1992	0.735243	123	0.392349	0.743245	166	0.380824
95	1993	0.730827	128	0.409498	0.739177	204	0.359614
95	1994	0.730827	128	0.410085	0.734147	200	0.359122
95	1995	0.730827	128	0.408399	0.730516	203	0.355817
95	1996	0.730827	128	0.41088	0.725005	222	0.331666
95	1997	0.730827	128	0.410324	0.731816	231	0.342385
95	1998	0.730827	128	0.408107	0.721941	228	0.336202
95	1999	0.730827	128	0.407934	0.723119	228	0.359806
95	2000	0.730827	128	0.411212	0.719217	227	0.3599
95	2001	0.730827	128	0.409182	0.722986	213	0.371055
95	2002	0.730827	128	0.409886	0.727194	219	0.368988
95	2003	0.730827	128	0.409825	0.726531	232	0.356403
95	2004	0.730827	128	0.410948	0.739446	241	0.350831
95	2005	0.730827	128	0.41049	0.732364	233	0.362735
95	2006	0.730827	128	0.408526	0.746663	244	0.34269
95	2007	0.730827	128	0.407665	0.738392	222	0.378245
95	2008	0.730827	128	0.408143	0.763484	231	0.363382
95	2009	0.730827	128	0.405011	0.748708	240	0.347341
95	2010	0.730827	128	0.40557	0.745663	248	0.343337
96	1992	NA	NA	NA	0.746395	257	0.433208
96	1993	NA	NA	NA	0.748398	252	0.429344
96	1994	NA	NA	NA	0.747934	253	0.423031
96	1995	NA	NA	NA	0.747557	252	0.430287
96	1996	NA	NA	NA	0.749969	251	0.426524
96	1997	NA	NA	NA	0.747123	251	0.423053
96	1998	NA	NA	NA	0.747151	255	0.414365
96	1999	NA	NA	NA	0.746886	256	0.416423
96	2000	NA	NA	NA	0.745787	255	0.42024
96	2001	NA	NA	NA	0.747158	255	0.416456
96	2002	NA	NA	NA	0.748562	256	0.427416
96	2003	NA	NA	NA	0.748508	254	0.429144
96	2004	NA	NA	NA	0.747524	254	0.431245
96	2005	NA	NA	NA	0.745049	257	0.422611
96	2006	NA	NA	NA	0.748314	253	0.420081
96	2007	NA	NA	NA	0.747374	255	0.416164
96	2008	NA	NA	NA	0.748165	249	0.427615
96	2009	NA	NA	NA	0.747828	250	0.425316
96	2010	NA	NA	NA	0.738123	241	0.433338
97	1992	0.707146	168	0.435936	0.727407	234	0.440481
97	1993	0.700365	160	0.44831	0.739124	232	0.442607
97	1994	0.699893	161	0.448394	0.750773	238	0.438886
97	1995	0.700957	160	0.44296	0.745012	243	0.42567
97	1996	0.696896	156	0.442812	0.732719	237	0.433551
97	1997	0.697423	155	0.439625	0.731171	237	0.430731
97	1998	0.697423	155	0.443652	0.722929	245	0.430273
97	1999	0.697423	155	0.444861	0.730289	239	0.437925
97	2000	0.697423	155	0.441715	0.730552	248	0.417763
97	2001	0.698502	154	0.437937	0.736261	231	0.445816
97	2002	0.698502	154	0.437374	0.742534	258	0.410141
97	2003	0.704769	164	0.437769	0.733028	242	0.438138
97	2004	0.704769	164	0.435901	0.730582	265	0.412252
97	2005	0.704769	164	0.43645	0.743304	268	0.418041
97	2006	0.704769	164	0.436447	0.726596	248	0.442108
97	2007	0.704769	164	0.433781	0.743943	266	0.41473
97	2008	0.704769	164	0.433613	0.741332	258	0.427428
97	2009	0.704769	164	0.434529	0.74439	250	0.437272
97	2010	0.704769	164	0.427938	0.753858	282	0.4002
98	1992	0.684389	102	0.562675	0.729012	236	0.385074
98	1993	0.684389	102	0.563983	0.735165	214	0.429266
98	1994	0.683964	102	0.559702	0.731736	240	0.402833
98	1995	0.68465	101	0.5586	0.732605	238	0.402458
98	1996	0.68465	101	0.563316	0.726849	242	0.411014
98	1997	0.68465	101	0.559135	0.7289	236	0.41971
98	1998	0.68465	101	0.56193	0.729179	235	0.404157
98	1999	0.684616	100	0.564605	0.728521	237	0.417623
98	2000	0.684616	100	0.566193	0.744231	231	0.438553
98	2001	0.684616	100	0.564941	0.742536	240	0.427034
98	2002	0.684616	100	0.56454	0.724645	236	0.427287
98	2003	0.684616	100	0.563754	0.728441	238	0.422872
98	2004	0.684616	100	0.560636	0.74535	262	0.404142
98	2005	0.684616	100	0.560064	0.741219	254	0.4172
98	2006	0.684616	100	0.561413	0.743931	256	0.414554
98	2007	0.684616	100	0.565167	0.74247	252	0.419138
98	2008	0.694299	102	0.560855	0.75636	262	0.405881
98	2009	0.694299	102	0.565516	0.741952	262	0.408379
98	2010	0.69717	103	0.569313	0.746756	252	0.428488
99	1992	0.890145	11	0.555929	0.730603	225	0.33738
99	1993	0.890145	11	0.571542	0.731942	222	0.341501
99	1994	0.890145	11	0.571614	0.730791	225	0.337585
99	1995	0.890145	11	0.571989	0.746046	236	0.330833
99	1996	0.890145	11	0.572735	0.744731	239	0.33467
99	1997	0.890145	11	0.574939	0.745168	238	0.338271
99	1998	0.890145	11	0.562619	0.746532	235	0.342897
99	1999	0.890145	11	0.568137	0.729142	229	0.354973
99	2000	0.890145	11	0.569954	0.729392	228	0.361169
99	2001	0.890145	11	0.574724	0.730503	226	0.367668
99	2002	0.890145	11	0.5804	0.744543	240	0.35896
99	2003	0.890145	11	0.582531	0.73329	235	0.366561
99	2004	0.890145	11	0.579761	0.729655	228	0.381116
99	2005	0.890145	11	0.576558	0.747825	244	0.364195
99	2006	0.890145	11	0.578775	0.730574	242	0.369444
99	2007	0.890145	11	0.585394	0.717761	222	0.398486
99	2008	0.890145	11	0.589217	0.735938	230	0.385959
99	2009	0.890145	11	0.596966	0.74564	237	0.380007
99	2010	0.890145	11	0.593647	0.742838	235	0.382594
100	1992	0.706024	204	0.443219	0.717992	236	0.432805
100	1993	0.706024	204	0.444516	0.729376	245	0.418006
100	1994	0.706024	204	0.443994	0.732513	248	0.417666
100	1995	0.706024	204	0.443413	0.724862	248	0.418191
100	1996	0.706024	204	0.443706	0.735816	261	0.404007
100	1997	0.706024	204	0.44346	0.735706	260	0.402351
100	1998	0.706024	204	0.4437	0.724585	254	0.417459
100	1999	0.706024	204	0.444538	0.73411	264	0.410533
100	2000	0.706024	204	0.445083	0.732601	264	0.410401
100	2001	0.706024	204	0.446144	0.731974	265	0.411644
100	2002	0.706024	204	0.44535	0.74807	277	0.4031
100	2003	0.706024	204	0.445533	0.747218	279	0.401675
100	2004	0.706024	204	0.444023	0.735121	263	0.407004
100	2005	0.706024	204	0.443528	0.735898	266	0.408393
100	2006	0.706024	204	0.444457	0.732795	259	0.419303
100	2007	0.706024	204	0.44381	0.736524	263	0.409163
100	2008	0.706024	204	0.444698	0.737775	264	0.410606
100	2009	0.706024	204	0.443701	0.73467	262	0.411139
100	2010	0.706024	204	0.444236	0.738061	263	0.409562
101	1992	0.739346	168	0.366641	0.756361	285	0.346826
101	1993	0.739346	168	0.365741	0.749027	272	0.365776
101	1994	0.739346	168	0.365558	0.756232	285	0.35473
101	1995	0.739346	168	0.365793	0.747013	278	0.363957
101	1996	0.739346	168	0.364064	0.74795	276	0.371559
101	1997	0.739346	168	0.362716	0.748121	276	0.365698
101	1998	0.739346	168	0.364263	0.748465	277	0.356765
101	1999	0.739346	168	0.363748	0.7492	273	0.37023
101	2000	0.739346	168	0.363837	0.747755	279	0.374729
101	2001	0.739346	168	0.36414	0.749967	273	0.377756
101	2002	0.739346	168	0.3652	0.748568	277	0.372921
101	2003	0.739346	168	0.364042	0.748061	276	0.384474
101	2004	0.739346	168	0.365815	0.748566	277	0.378655
101	2005	0.739346	168	0.36534	0.749559	274	0.384918
101	2006	0.739346	168	0.364761	0.748566	277	0.382401
101	2007	0.739346	168	0.365008	0.748475	275	0.380236
101	2008	0.739346	168	0.365336	0.748154	278	0.375181
101	2009	0.739346	168	0.364162	0.747935	276	0.368009
101	2010	0.739346	168	0.362614	0.758065	281	0.356218
102	1992	0.687823	185	0.460806	0.695226	192	0.468573
102	1993	0.687823	185	0.463947	0.695335	191	0.478147
102	1994	0.688492	183	0.467843	0.722435	207	0.451133
102	1995	0.688492	183	0.466484	0.700784	194	0.475559
102	1996	0.688492	183	0.467926	0.700784	194	0.471919
102	1997	0.688492	183	0.468476	0.712985	214	0.444539
102	1998	0.688492	183	0.467997	0.721205	209	0.459785
102	1999	0.688492	183	0.469863	0.716434	208	0.467334
102	2000	0.688492	183	0.469881	0.721657	208	0.470411
102	2001	0.688492	183	0.469337	0.727674	209	0.47214
102	2002	0.688492	183	0.468837	0.723095	229	0.43954
102	2003	0.688492	183	0.474668	0.728291	239	0.42602
102	2004	0.688492	183	0.475512	0.72671	226	0.464073
102	2005	0.687423	197	0.444223	0.725027	229	0.463209
102	2006	0.687423	197	0.444736	0.722726	234	0.442996
102	2007	0.687423	197	0.444366	0.736722	251	0.418094
102	2008	0.687423	197	0.445382	0.726215	229	0.453462
102	2009	0.687423	197	0.446434	0.724163	238	0.439332
102	2010	0.688492	183	0.480787	0.739399	244	0.432126
103	1992	0.69238	132	0.497059	0.726044	171	0.438393
103	1993	0.69238	132	0.492351	0.726812	164	0.449647
103	1994	0.69238	132	0.493488	0.732577	164	0.453311
103	1995	0.69238	132	0.495224	0.726757	156	0.459585
103	1996	0.69238	132	0.493542	0.726757	156	0.461918
103	1997	0.69238	132	0.492202	0.726757	156	0.45659
103	1998	0.69238	132	0.491166	0.724759	161	0.450418
103	1999	0.69238	132	0.488665	0.726757	156	0.463051
103	2000	0.69238	132	0.489431	0.726757	156	0.465573
103	2001	0.693728	130	0.489584	0.728924	160	0.452368
103	2002	0.693728	130	0.479726	0.738103	178	0.410749
103	2003	0.690935	129	0.483393	0.74038	183	0.428476
103	2004	0.689579	131	0.483707	0.731522	189	0.408251
103	2005	0.689579	131	0.483153	0.733117	192	0.441251
103	2006	0.689579	131	0.487757	0.741078	197	0.413414
103	2007	0.689579	131	0.486474	0.746778	201	0.419762
103	2008	0.69238	132	0.491682	0.746778	201	0.427336
103	2009	0.69238	132	0.488759	0.746778	201	0.420529
103	2010	0.69238	132	0.488059	0.746778	201	0.416412
104	1992	0.669683	81	0.384412	0.738122	273	0.385651
104	1993	0.671322	80	0.38022	0.753285	282	0.366008
104	1994	0.671322	80	0.380576	0.754419	279	0.366881
104	1995	0.671322	80	0.379947	0.742138	269	0.374636
104	1996	0.671322	80	0.38363	0.742979	272	0.383812
104	1997	0.671322	80	0.382505	0.742509	272	0.377774
104	1998	0.671322	80	0.379728	0.757734	281	0.371296
104	1999	0.671322	80	0.382875	0.755804	286	0.379687
104	2000	0.671322	80	0.38552	0.744613	279	0.389024
104	2001	0.671322	80	0.38616	0.7433	275	0.398532
104	2002	0.671322	80	0.383208	0.756967	280	0.394446
104	2003	0.671322	80	0.38116	0.744365	272	0.407813
104	2004	0.671322	80	0.379123	0.746155	276	0.409824
104	2005	0.671322	80	0.382768	0.745334	277	0.405052
104	2006	0.682126	84	0.386048	0.747318	277	0.415831
104	2007	0.682126	84	0.385285	0.746202	275	0.418538
104	2008	0.682126	84	0.384971	0.746202	275	0.417821
104	2009	0.682126	84	0.382288	0.746912	273	0.413983
104	2010	0.682126	84	0.38151	0.747641	272	0.418749
105	1992	0.670961	172	0.420015	0.720737	248	0.435247
105	1993	0.671318	171	0.42003	0.720737	248	0.44032
105	1994	0.671318	171	0.417074	0.72103	247	0.439764
105	1995	0.671318	171	0.417931	0.723039	242	0.441176
105	1996	0.67171	170	0.416486	0.722137	244	0.437796
105	1997	0.670006	175	0.41301	0.733902	255	0.421932
105	1998	0.670006	175	0.413479	0.722437	243	0.438911
105	1999	0.670006	175	0.417047	0.724029	251	0.439006
105	2000	0.670006	175	0.417415	0.724029	251	0.43878
105	2001	0.670006	175	0.418888	0.736742	258	0.428836
105	2002	0.670006	175	0.421472	0.724457	250	0.443227
105	2003	0.670006	175	0.421413	0.725109	248	0.441214
105	2004	0.670006	175	0.419992	0.724884	248	0.444338
105	2005	0.670006	175	0.422592	0.742258	257	0.430781
105	2006	0.670006	175	0.420289	0.74205	252	0.431698
105	2007	0.670006	175	0.420812	0.742682	251	0.436675
105	2008	0.670006	175	0.424091	0.741852	253	0.437454
105	2009	0.670006	175	0.425791	0.752238	262	0.424954
105	2010	0.670006	175	0.422537	0.737835	255	0.439771
106	1992	0.682631	170	0.497113	0.73992	282	0.42149
106	1993	0.681719	164	0.507937	0.751704	292	0.413809
106	1994	0.685916	162	0.518538	0.753196	292	0.418223
106	1995	0.683097	161	0.514134	0.752048	291	0.411272
106	1996	0.677143	158	0.517583	0.752852	293	0.412334
106	1997	0.677143	158	0.518518	0.753196	292	0.411552
106	1998	0.677143	158	0.518895	0.753196	292	0.415466
106	1999	0.676686	159	0.523139	0.753196	292	0.418208
106	2000	0.676686	159	0.522926	0.754597	293	0.421997
106	2001	0.676686	159	0.522902	0.752031	291	0.422932
106	2002	0.676351	160	0.52577	0.752031	291	0.427747
106	2003	0.674478	165	0.522066	0.753444	292	0.43106
106	2004	0.674478	165	0.521796	0.753444	292	0.431275
106	2005	0.674478	165	0.520385	0.753444	292	0.431408
106	2006	0.674478	165	0.52202	0.753444	292	0.43404
106	2007	0.674478	165	0.520704	0.752921	289	0.437235
106	2008	0.674478	165	0.521876	0.752921	289	0.440418
106	2009	0.674478	165	0.522099	0.752921	289	0.439284
106	2010	0.674478	165	0.522904	0.752921	289	0.438249
107	1992	0.750426	151	0.350857	0.740754	194	0.37874
107	1993	0.750426	151	0.350331	0.741458	193	0.374596
107	1994	0.750426	151	0.350527	0.741458	193	0.373649
107	1995	0.750426	151	0.351028	0.748786	217	0.349113
107	1996	0.746045	163	0.331737	0.750369	218	0.354816
107	1997	0.751661	172	0.334665	0.7467	253	0.370769
107	1998	0.750969	173	0.337471	0.753186	247	0.384335
107	1999	0.750969	173	0.336922	0.750816	256	0.375421
107	2000	0.750969	173	0.342059	0.755607	243	0.388885
107	2001	0.748058	181	0.337055	0.752878	257	0.381179
107	2002	0.748058	181	0.336073	0.752517	253	0.377087
107	2003	0.748058	181	0.335227	0.759977	254	0.368965
107	2004	0.748058	181	0.337505	0.763055	262	0.374308
107	2005	0.748058	181	0.336792	0.760419	270	0.364611
107	2006	0.748058	181	0.338696	0.752485	262	0.376333
107	2007	0.748058	181	0.339766	0.765109	264	0.376691
107	2008	0.748058	181	0.340048	0.7545	252	0.387781
107	2009	0.748058	181	0.339414	0.752593	252	0.373557
107	2010	0.748058	181	0.3397	0.754055	253	0.382876
108	1992	0.703748	106	0.500225	0.709099	132	0.465759
108	1993	0.703748	106	0.498312	0.704816	146	0.453713
108	1994	0.703748	106	0.494906	0.720555	151	0.447349
108	1995	0.697225	123	0.450235	0.750612	209	0.397851
108	1996	0.697225	123	0.452183	0.735942	216	0.384093
108	1997	0.697225	123	0.455721	0.730686	177	0.448655
108	1998	0.696945	131	0.440898	0.722747	195	0.418838
108	1999	0.696945	131	0.445563	0.742211	194	0.404347
108	2000	0.698335	137	0.453057	0.74588	243	0.391357
108	2001	0.702803	144	0.433104	0.750944	235	0.403207
108	2002	0.702803	144	0.432473	0.753519	242	0.393114
108	2003	0.702803	144	0.433781	0.731098	218	0.423328
108	2004	0.702803	144	0.43116	0.734401	249	0.383066
108	2005	0.702803	144	0.431724	0.73141	253	0.372074
108	2006	0.702803	144	0.426992	0.733349	238	0.390075
108	2007	0.702803	144	0.425769	0.729915	240	0.393428
108	2008	0.702803	144	0.423508	0.748699	245	0.393993
108	2009	0.702803	144	0.42573	0.746906	240	0.403633
108	2010	0.702803	144	0.426068	0.74725	239	0.397779
109	1992	0.756422	133	0.457139	0.757383	232	0.387881
109	1993	0.756422	133	0.454276	0.756352	234	0.37468
109	1994	0.756422	133	0.449674	0.756386	234	0.383057
109	1995	0.756422	133	0.453227	0.763859	233	0.387525
109	1996	0.756422	133	0.452175	0.75685	240	0.389889
109	1997	0.756422	133	0.452693	0.761427	226	0.410012
109	1998	0.756422	133	0.451076	0.767104	206	0.433869
109	1999	0.756422	133	0.454637	0.760768	236	0.399001
109	2000	0.756422	133	0.452503	0.769652	201	0.44462
109	2001	0.756422	133	0.453581	0.759575	262	0.400217
109	2002	0.756422	133	0.45054	0.754266	228	0.40123
109	2003	0.756422	133	0.451858	0.743936	222	0.404143
109	2004	0.756422	133	0.450593	0.753237	253	0.411537
109	2005	0.756422	133	0.451921	0.761673	258	0.407079
109	2006	0.756422	133	0.449829	0.759884	254	0.384781
109	2007	0.755514	134	0.455287	0.754376	252	0.406187
109	2008	0.755514	134	0.45422	0.752583	257	0.401109
109	2009	0.755514	134	0.455442	0.753199	257	0.404576
109	2010	0.755514	134	0.45608	0.761291	261	0.396061
110	1992	0.738015	140	0.49356	0.757636	283	0.436085
110	1993	0.738015	140	0.486199	0.757992	282	0.42953
110	1994	0.738644	139	0.486192	0.758402	281	0.433659
110	1995	0.738644	139	0.486443	0.758402	281	0.432101
110	1996	0.738644	139	0.487262	0.758402	281	0.431346
110	1997	0.741479	127	0.51678	0.758402	281	0.429007
110	1998	0.750057	121	0.535645	0.758839	280	0.433405
110	1999	0.74839	123	0.539028	0.758402	281	0.435025
110	2000	0.74839	123	0.539924	0.758402	281	0.438617
110	2001	0.74839	123	0.539156	0.758402	281	0.438832
110	2002	0.74839	123	0.539162	0.749212	273	0.45008
110	2003	0.744925	134	0.540192	0.747654	277	0.448836
110	2004	0.744925	134	0.540119	0.747654	277	0.450487
110	2005	0.744925	134	0.539514	0.747654	277	0.447535
110	2006	0.745522	133	0.538285	0.747654	277	0.446982
110	2007	0.745522	133	0.537474	0.749707	272	0.445531
110	2008	0.745522	133	0.537371	0.749707	272	0.446724
110	2009	0.745522	133	0.537584	0.749707	272	0.446919
110	2010	0.745522	133	0.537625	0.749707	272	0.445028
112	1992	0.659923	112	0.501704	0.738045	237	0.388021
112	1993	0.661725	128	0.455962	0.736378	226	0.406754
112	1994	0.690885	136	0.445725	0.720601	226	0.408639
112	1995	0.690885	136	0.441989	0.741965	245	0.392108
112	1996	0.695958	131	0.441951	0.730758	235	0.383074
112	1997	0.695958	131	0.446435	0.733833	228	0.418269
112	1998	0.695958	131	0.452194	0.72362	237	0.409319
112	1999	0.695958	131	0.446172	0.731431	235	0.41132
112	2000	0.695958	131	0.456338	0.731657	238	0.424207
112	2001	0.695958	131	0.454597	0.737998	228	0.426074
112	2002	0.695958	131	0.452756	0.727644	238	0.419029
112	2003	0.695958	131	0.451513	0.729373	228	0.42763
112	2004	0.695958	131	0.446657	0.728491	236	0.416038
112	2005	0.695958	131	0.448561	0.731441	239	0.415077
112	2006	0.695958	131	0.447184	0.728887	234	0.423263
112	2007	0.695958	131	0.442478	0.732933	236	0.429227
112	2008	0.670625	125	0.467031	0.735359	235	0.430019
112	2009	0.670625	125	0.465164	0.744621	250	0.408643
112	2010	0.670625	125	0.469609	0.732908	242	0.413962
113	1992	0.679419	141	0.401415	0.68288	142	0.40127
113	1993	0.678956	142	0.402871	0.688763	147	0.412788
113	1994	0.678956	142	0.405031	0.688115	149	0.421265
113	1995	0.678956	142	0.395084	0.688115	149	0.412106
113	1996	0.678956	142	0.391426	0.686518	153	0.414016
113	1997	0.678956	142	0.402813	0.686994	152	0.431953
113	1998	0.67791	143	0.407121	0.705777	213	0.374128
113	1999	0.704041	156	0.408128	0.711837	206	0.412632
113	2000	0.703089	157	0.413286	0.708844	203	0.426553
113	2001	0.703089	157	0.416175	0.721012	235	0.377474
113	2002	0.702253	158	0.425249	0.706299	223	0.409768
113	2003	0.696385	169	0.405588	0.706867	225	0.404101
113	2004	0.696385	169	0.402878	0.7073	226	0.39838
113	2005	0.694023	168	0.403654	0.715378	210	0.433803
113	2006	0.691554	167	0.406348	0.712707	212	0.428813
113	2007	0.694023	168	0.409579	0.70794	223	0.397803
113	2008	0.694023	168	0.404591	0.712249	210	0.412377
113	2009	0.694023	168	0.410348	0.712321	210	0.416079
113	2010	0.696385	169	0.408248	0.712478	209	0.39949
114	1992	0.753815	218	0.435	0.750289	244	0.427813
114	1993	0.753815	218	0.435331	0.753728	241	0.436921
114	1994	0.754634	220	0.440181	0.755334	242	0.438398
114	1995	0.754634	220	0.439477	0.753915	245	0.435607
114	1996	0.753857	221	0.438144	0.75414	245	0.423533
114	1997	0.753857	221	0.439715	0.753033	247	0.438444
114	1998	0.753857	221	0.441787	0.751988	250	0.430174
114	1999	0.753857	221	0.441538	0.752527	254	0.427791
114	2000	0.753857	221	0.442759	0.754515	249	0.436697
114	2001	0.753857	221	0.441593	0.765255	254	0.416114
114	2002	0.753857	221	0.443261	0.763324	258	0.419704
114	2003	0.753857	221	0.445716	0.764106	257	0.414265
114	2004	0.753857	221	0.44831	0.763864	262	0.419498
114	2005	0.753857	221	0.446515	0.760978	269	0.410555
114	2006	0.753857	221	0.444345	0.751253	258	0.41747
114	2007	0.753857	221	0.444454	0.75154	257	0.430727
114	2008	0.753857	221	0.448849	0.752812	254	0.436484
114	2009	0.753857	221	0.447909	0.752812	254	0.433326
114	2010	0.753857	221	0.446962	0.752033	256	0.43036
115	1992	0.719557	119	0.357104	0.742175	125	0.37012
115	1993	0.719557	119	0.359437	0.741187	126	0.382701
115	1994	0.719557	119	0.361133	0.73324	130	0.383486
115	1995	0.719557	119	0.358949	0.731607	128	0.390295
115	1996	0.719557	119	0.355513	0.747855	159	0.364843
115	1997	0.719557	119	0.357365	0.737759	142	0.389277
115	1998	0.719557	119	0.358105	0.738008	148	0.38787
115	1999	0.719557	119	0.353417	0.738797	141	0.389254
115	2000	0.719557	119	0.353832	0.757188	209	0.359874
115	2001	0.719557	119	0.353162	0.760186	197	0.350384
115	2002	0.719557	119	0.356216	0.741014	205	0.33725
115	2003	0.719557	119	0.350112	0.750312	191	0.34547
115	2004	0.719557	119	0.352205	0.740427	212	0.324344
115	2005	0.719557	119	0.348316	0.719088	190	0.346941
115	2006	0.719557	119	0.346707	0.726415	194	0.342159
115	2007	0.719557	119	0.344754	0.740358	206	0.339987
115	2008	0.719557	119	0.342817	0.740358	206	0.341093
115	2009	0.719557	119	0.342384	0.740358	206	0.347308
115	2010	0.719557	119	0.342893	0.730107	225	0.339997
116	1992	0.712192	102	0.419075	0.719378	119	0.461865
116	1993	0.712192	102	0.418498	0.717285	116	0.462905
116	1994	0.712192	102	0.418357	0.717285	116	0.460412
116	1995	0.712192	102	0.419929	0.725628	118	0.450573
116	1996	0.712192	102	0.417757	0.728445	120	0.470167
116	1997	0.712192	102	0.417675	0.728964	119	0.457839
116	1998	0.712192	102	0.416823	0.727453	121	0.462279
116	1999	0.712192	102	0.419341	0.716725	129	0.442167
116	2000	0.712192	102	0.419143	0.716725	129	0.44623
116	2001	0.712192	102	0.420219	0.716324	130	0.44428
116	2002	0.712192	102	0.421202	0.716324	130	0.443927
116	2003	0.712192	102	0.42156	0.716725	129	0.44172
116	2004	0.712192	102	0.421174	0.716725	129	0.441858
116	2005	0.712192	102	0.421149	0.716725	129	0.430313
116	2006	0.712192	102	0.421451	0.716725	129	0.424845
116	2007	0.712192	102	0.420228	0.716725	129	0.419866
116	2008	0.712192	102	0.420523	0.727453	121	0.449825
116	2009	0.712192	102	0.421363	0.727453	121	0.449141
116	2010	0.712192	102	0.421284	0.727453	121	0.452891
117	1992	0.696693	151	0.441309	0.748075	246	0.413342
117	1993	0.697963	147	0.440776	0.758576	252	0.404707
117	1994	0.698462	146	0.438729	0.761833	256	0.405975
117	1995	0.698462	146	0.438323	0.759853	253	0.402069
117	1996	0.699482	145	0.432574	0.752985	247	0.414124
117	1997	0.699482	145	0.434273	0.752023	249	0.42279
117	1998	0.699482	145	0.431503	0.752654	243	0.414527
117	1999	0.699482	145	0.431568	0.752304	244	0.424961
117	2000	0.700009	144	0.431382	0.749873	250	0.42443
117	2001	0.700009	144	0.431747	0.751061	251	0.421592
117	2002	0.700009	144	0.433412	0.749568	263	0.408492
117	2003	0.700009	144	0.432209	0.743238	273	0.40253
117	2004	0.697557	143	0.432744	0.74458	272	0.409259
117	2005	0.704051	145	0.439137	0.745573	270	0.408929
117	2006	0.704051	145	0.439386	0.747765	265	0.42133
117	2007	0.704051	145	0.43876	0.745776	265	0.406175
117	2008	0.704051	145	0.438154	0.756089	273	0.403346
117	2009	0.704051	145	0.439797	0.756089	273	0.405322
117	2010	0.704051	145	0.442451	0.753888	277	0.398571
118	1992	0.680356	89	0.366485	0.732833	206	0.437515
118	1993	0.680356	89	0.372573	0.728554	217	0.418482
118	1994	0.680356	89	0.374746	0.729173	220	0.418658
118	1995	0.680356	89	0.377767	0.729173	220	0.421997
118	1996	0.680356	89	0.374602	0.725796	218	0.418349
118	1997	0.680356	89	0.383942	0.727369	219	0.424235
118	1998	0.680356	89	0.3903	0.727369	219	0.423796
118	1999	0.680356	89	0.380807	0.725796	218	0.409568
118	2000	0.680356	89	0.379062	0.736135	226	0.449418
118	2001	0.680356	89	0.378346	0.718105	187	0.478597
118	2002	0.680356	89	0.378044	0.725616	222	0.407669
118	2003	0.680356	89	0.3802	0.725616	222	0.403194
118	2004	0.680356	89	0.382191	0.725616	222	0.410622
118	2005	0.680356	89	0.384149	0.743174	231	0.4015
118	2006	0.680356	89	0.38428	0.739093	230	0.404331
118	2007	0.680356	89	0.384081	0.742171	233	0.40233
118	2008	0.680356	89	0.387158	0.742171	233	0.398601
118	2009	0.680356	89	0.388046	0.740976	232	0.398843
118	2010	0.680356	89	0.392938	0.742171	233	0.399704
119	1992	0.677778	76	0.411676	0.704003	120	0.407749
119	1993	0.677778	76	0.425336	0.728911	226	0.377279
119	1994	0.677778	76	0.417002	0.736902	220	0.388143
119	1995	0.677778	76	0.419812	0.736848	217	0.388283
119	1996	0.677778	76	0.41995	0.735088	221	0.388433
119	1997	0.666599	86	0.42746	0.731244	228	0.395382
119	1998	0.66857	85	0.426304	0.73541	239	0.385029
119	1999	0.678186	91	0.416891	0.728053	238	0.385992
119	2000	0.678186	91	0.426829	0.726799	240	0.396279
119	2001	0.678186	91	0.434475	0.724567	246	0.39593
119	2002	0.678186	91	0.425921	0.722133	241	0.395307
119	2003	0.67696	92	0.430222	0.72169	242	0.400605
119	2004	0.675762	94	0.435481	0.722813	250	0.406257
119	2005	0.675762	94	0.441414	0.728398	245	0.421375
119	2006	0.670532	109	0.389283	0.724463	251	0.41424
119	2007	0.668576	111	0.394568	0.737396	260	0.403441
119	2008	0.6695	110	0.365167	0.738451	268	0.390392
119	2009	0.6695	110	0.365145	0.74227	268	0.397218
119	2010	0.6695	110	0.362879	0.740963	271	0.39255
120	1992	0.671121	94	0.38211	0.699003	102	0.385119
120	1993	0.671121	94	0.383699	0.700951	99	0.385711
120	1994	0.671121	94	0.384477	0.714299	130	0.343255
120	1995	0.671121	94	0.379566	0.710779	136	0.335584
120	1996	0.671121	94	0.379165	0.710417	137	0.35046
120	1997	0.671121	94	0.381153	0.70424	126	0.376837
120	1998	0.671121	94	0.383528	0.707375	134	0.340793
120	1999	0.671121	94	0.388677	0.710086	137	0.353153
120	2000	0.671121	94	0.390154	0.697656	130	0.365634
120	2001	0.671121	94	0.395133	0.697656	130	0.367045
120	2002	0.671121	94	0.394375	0.697351	131	0.369188
120	2003	0.671121	94	0.396601	0.706049	137	0.37054
120	2004	0.671121	94	0.394269	0.693519	129	0.380872
120	2005	0.671121	94	0.39546	0.697526	130	0.39133
120	2006	0.671121	94	0.392851	0.705661	151	0.352671
120	2007	0.671121	94	0.391381	0.701678	151	0.349223
120	2008	0.671121	94	0.391751	0.701678	151	0.348394
120	2009	0.671121	94	0.394075	0.701678	151	0.357513
120	2010	0.671121	94	0.393602	0.701678	151	0.360454
121	1992	0.665618	140	0.490718	0.707739	177	0.507674
121	1993	0.665618	140	0.491256	0.707739	177	0.506704
121	1994	0.665618	140	0.490304	0.720649	203	0.454734
121	1995	0.665618	140	0.49004	0.720649	203	0.461332
121	1996	0.665618	140	0.490825	0.720649	203	0.462074
121	1997	0.667769	138	0.486717	0.738158	229	0.451975
121	1998	0.671033	140	0.495461	0.732288	231	0.455426
121	1999	0.671033	140	0.49576	0.749357	232	0.453127
121	2000	0.671346	139	0.496691	0.736177	232	0.460567
121	2001	0.667482	138	0.495225	0.747793	240	0.443129
121	2002	0.667596	138	0.489719	0.759443	254	0.420365
121	2003	0.667596	138	0.487941	0.756977	251	0.431776
121	2004	0.667596	138	0.488374	0.742045	262	0.415803
121	2005	0.676916	131	0.504673	0.744468	264	0.415193
121	2006	0.667596	138	0.488615	0.733153	248	0.428909
121	2007	0.667596	138	0.487343	0.733239	246	0.422626
121	2008	0.667596	138	0.487359	0.734972	245	0.426994
121	2009	0.667596	138	0.492278	0.732557	250	0.428234
121	2010	0.667596	138	0.492589	0.733922	247	0.432541
122	1992	0.676513	54	0.275601	0.730806	103	0.376375
122	1993	0.676513	54	0.269502	0.731301	102	0.378201
122	1994	0.676513	54	0.270675	0.733655	100	0.375186
122	1995	0.676513	54	0.284875	0.734178	99	0.380027
122	1996	0.676513	54	0.275326	0.730806	103	0.380051
122	1997	0.676513	54	0.281927	0.730806	103	0.385343
122	1998	0.676513	54	0.277971	0.730806	103	0.385225
122	1999	0.676513	54	0.27436	0.726711	99	0.403268
122	2000	0.676513	54	0.277741	0.726711	99	0.404759
122	2001	0.676513	54	0.274921	0.726711	99	0.399949
122	2002	0.676513	54	0.279577	0.726711	99	0.396625
122	2003	0.676513	54	0.2822	0.72725	98	0.397021
122	2004	0.676513	54	0.283607	0.72725	98	0.392239
122	2005	0.676513	54	0.278403	0.72725	98	0.389888
122	2006	0.676513	54	0.269213	0.727777	97	0.389564
122	2007	0.676513	54	0.286214	0.727777	97	0.396477
122	2008	0.676513	54	0.280093	0.727777	97	0.393192
122	2009	0.676513	54	0.278387	0.727777	97	0.394727
122	2010	0.676513	54	0.281433	0.727777	97	0.395427
123	1992	0.725603	92	0.26805	0.752465	134	0.275457
123	1993	0.725603	92	0.267976	0.742106	137	0.283739
123	1994	0.725603	92	0.269137	0.751386	143	0.27644
123	1995	0.725603	92	0.27134	0.750829	144	0.280135
123	1996	0.725603	92	0.272344	0.753616	140	0.280984
123	1997	0.725603	92	0.269741	0.7516	143	0.278705
123	1998	0.725603	92	0.270635	0.755001	138	0.275964
123	1999	0.725603	92	0.270982	0.750829	144	0.274446
123	2000	0.725603	92	0.271216	0.753616	140	0.279963
123	2001	0.725603	92	0.270174	0.750829	144	0.279267
123	2002	0.725603	92	0.27035	0.7516	143	0.278
123	2003	0.725603	92	0.270232	0.750829	144	0.279731
123	2004	0.725603	92	0.270529	0.750829	144	0.288899
123	2005	0.725603	92	0.271482	0.749822	146	0.301075
123	2006	0.725603	92	0.26939	0.750348	145	0.29095
123	2007	0.725603	92	0.269265	0.750348	145	0.293187
123	2008	0.725603	92	0.269666	0.750348	145	0.287167
123	2009	0.725603	92	0.26789	0.750348	145	0.286111
123	2010	0.725603	92	0.267681	0.760546	166	0.264257
124	1992	0.696027	99	0.432993	0.750669	217	0.348099
124	1993	0.696027	99	0.433803	0.750669	217	0.337003
124	1994	0.696027	99	0.434277	0.747212	215	0.338968
124	1995	0.696027	99	0.434416	0.749329	220	0.331049
124	1996	0.696027	99	0.435244	0.751462	212	0.339709
124	1997	0.696027	99	0.436416	0.741242	205	0.341506
124	1998	0.696027	99	0.436767	0.73684	220	0.336717
124	1999	0.696027	99	0.436741	0.734255	215	0.343639
124	2000	0.696027	99	0.435168	0.731495	206	0.346211
124	2001	0.696027	99	0.43389	0.725892	216	0.372092
124	2002	0.696027	99	0.435869	0.728785	190	0.414782
124	2003	0.696027	99	0.436419	0.726417	216	0.379164
124	2004	0.696027	99	0.438002	0.731749	215	0.399057
124	2005	0.696027	99	0.438412	0.735231	223	0.383094
124	2006	0.696027	99	0.439519	0.734191	214	0.387071
124	2007	0.696027	99	0.439869	0.734896	224	0.379011
124	2008	0.696027	99	0.43962	0.734896	224	0.3756
124	2009	0.696027	99	0.438354	0.734896	224	0.37885
124	2010	0.696027	99	0.439261	0.747219	232	0.363248
125	1992	NA	1	NA	NA	1	NA
125	1993	NA	1	NA	NA	1	NA
125	1994	NA	1	NA	NA	1	NA
125	1995	NA	1	NA	NA	1	NA
125	1996	NA	1	NA	NA	1	NA
125	1997	NA	1	NA	NA	1	NA
125	1998	NA	1	NA	NA	1	NA
125	1999	NA	1	NA	NA	1	NA
125	2000	NA	1	NA	NA	1	NA
125	2001	NA	1	NA	NA	1	NA
125	2002	NA	1	NA	NA	1	NA
125	2003	NA	1	NA	NA	1	NA
125	2004	NA	1	NA	NA	1	NA
125	2005	NA	1	NA	NA	1	NA
125	2006	NA	1	NA	NA	1	NA
125	2007	NA	1	NA	NA	1	NA
125	2008	NA	1	NA	NA	1	NA
125	2009	NA	1	NA	NA	1	NA
125	2010	NA	1	NA	NA	1	NA
126	1992	0.639503	67	0.433061	0.676683	121	0.428592
126	1993	0.647873	69	0.45624	0.680684	128	0.434859
126	1994	0.647873	69	0.456333	0.724343	211	0.373072
126	1995	0.647873	69	0.458526	0.735689	223	0.367449
126	1996	0.647873	69	0.464398	0.732914	225	0.383945
126	1997	0.647873	69	0.468194	0.730464	231	0.385637
126	1998	0.647873	69	0.460293	0.721372	219	0.405735
126	1999	0.644099	74	0.462527	0.72628	229	0.394703
[truncated: 2,061 more rows]
